# Supplementary material for: Antimycobacterial cyclic peptide natural products bind and dysregulate stress response chaperones
Source: Research Square preprint supplement (doi:10.21203/rs.3.rs-5493888/v1), 2024-11-28
Supplement: Supplementary file 1 [file 2bac806952ce91ba4ff04a31.xlsx]

## Sheet: terminal DPR (%)
protein ID	Disorder promoting residues in first 15 residues (%)	Disorder promoting residues in last 15 residues (%)	Order promoting residues in first 15 residues (%)	Order promoting residues in last 15 residues (%)
A0A089QRB9	46.6667	60	20	26.6667
I6WXK4	46.6667	46.6667	33.3333	33.3333
I6WZG6	40	40	26.6667	40
I6X235	40	66.6667	20	20
I6X8D2	73.3333	66.6667	6.66667	20
I6XD65	26.6667	53.3333	46.6667	33.3333
I6XD69	53.3333	26.6667	20	26.6667
I6XFS7	60	46.6667	26.6667	33.3333
I6XHI4	53.3333	53.3333	33.3333	33.3333
I6XU97	33.3333	46.6667	33.3333	40
I6Y0R5	60	60	0	20
I6Y2J4	46.6667	53.3333	40	40
I6Y3Q0	40	73.3333	20	20
I6Y4D2	40	66.6667	46.6667	26.6667
I6Y4U9	60	80	33.3333	20
I6Y778	53.3333	46.6667	26.6667	33.3333
I6Y9J2	66.6667	53.3333	20	26.6667
I6Y9Q3	66.6667	53.3333	13.3333	33.3333
I6YCA3	66.6667	46.6667	20	33.3333
I6YFP0	53.3333	40	13.3333	40
I6YG32	40	60	20	6.66667
L0T905	53.3333	73.3333	26.6667	6.66667
L0T911	86.6667	60	0	26.6667
L0TC47	46.6667	66.6667	33.3333	26.6667
O05306	33.3333	46.6667	33.3333	33.3333
O05307	33.3333	80	33.3333	20
O05442	60	60	20	33.3333
O05461	20	73.3333	53.3333	26.6667
O05581	46.6667	53.3333	26.6667	33.3333
O05877	33.3333	26.6667	20	46.6667
O06218	53.3333	80	26.6667	6.66667
O06319	73.3333	60	13.3333	20
O06350	66.6667	86.6667	26.6667	13.3333
O06428	40	46.6667	26.6667	33.3333
O06543	60	33.3333	33.3333	33.3333
O06582	33.3333	53.3333	40	40
O06769	53.3333	33.3333	26.6667	33.3333
O07427	40	26.6667	13.3333	46.6667
O07431	46.6667	53.3333	13.3333	40
O07732	53.3333	33.3333	20	33.3333
O07783	40	26.6667	33.3333	33.3333
O33194	33.3333	46.6667	40	20
O33283	53.3333	46.6667	6.66667	46.6667
O33289	60	33.3333	20	46.6667
O33336	33.3333	40	40	53.3333
O33348	33.3333	33.3333	26.6667	46.6667
O33363	33.3333	46.6667	46.6667	40
O50406	46.6667	53.3333	26.6667	33.3333
O53166	40	46.6667	20	46.6667
O53168	86.6667	40	0	40
O53177	53.3333	73.3333	20	26.6667
O53181	46.6667	33.3333	13.3333	33.3333
O53289	33.3333	53.3333	33.3333	26.6667
O53353	73.3333	73.3333	20	26.6667
O53361	53.3333	40	33.3333	26.6667
O53423	60	80	20	13.3333
O53424	46.6667	66.6667	40	26.6667
O53493	53.3333	73.3333	26.6667	13.3333
O53512	26.6667	46.6667	40	40
O53547	46.6667	60	6.66667	13.3333
O53551	26.6667	60	33.3333	33.3333
O53561	60	73.3333	20	13.3333
O53580	40	53.3333	26.6667	26.6667
O53581	60	53.3333	20	20
O53585	53.3333	66.6667	40	13.3333
O53638	33.3333	33.3333	53.3333	46.6667
O53664	60	46.6667	20	26.6667
O53666	33.3333	33.3333	33.3333	26.6667
O53699	53.3333	60	33.3333	26.6667
O53873	33.3333	40	33.3333	40
O53896	60	66.6667	33.3333	20
O53901	46.6667	60	13.3333	13.3333
O65934	60	40	20	60
O69652	66.6667	60	26.6667	33.3333
O69711	66.6667	53.3333	13.3333	20
O69729	46.6667	66.6667	20	26.6667
P71590	66.6667	33.3333	26.6667	40
P71629	33.3333	53.3333	46.6667	33.3333
P71707	66.6667	86.6667	0	0
P71716	80	46.6667	0	26.6667
P71778	33.3333	80	20	13.3333
P71857	46.6667	53.3333	20	33.3333
P71858	53.3333	66.6667	26.6667	26.6667
P71875	46.6667	60	20	20
P95125	53.3333	46.6667	26.6667	33.3333
P95141	53.3333	46.6667	13.3333	26.6667
P95160	80	93.3333	0	6.66667
P95200	66.6667	93.3333	13.3333	0
P96202	53.3333	66.6667	13.3333	20
P96264	46.6667	46.6667	26.6667	26.6667
P96368	53.3333	53.3333	20	26.6667
P96379	33.3333	73.3333	46.6667	6.66667
P96890	66.6667	60	20	26.6667
P9WF09	33.3333	40	33.3333	26.6667
P9WF39	60	66.6667	6.66667	13.3333
P9WF41	60	60	20	13.3333
P9WF43	46.6667	66.6667	20	13.3333
P9WF97	26.6667	46.6667	46.6667	33.3333
P9WFD7	46.6667	53.3333	33.3333	33.3333
P9WFF1	66.6667	53.3333	26.6667	33.3333
P9WFF5	53.3333	66.6667	40	20
P9WFF7	66.6667	73.3333	6.66667	20
P9WFK7	33.3333	53.3333	26.6667	33.3333
P9WFR5	46.6667	53.3333	26.6667	40
P9WFR9	26.6667	53.3333	53.3333	26.6667
P9WFU7	46.6667	60	26.6667	26.6667
P9WFV7	20	53.3333	40	33.3333
P9WFX1	60	46.6667	20	40
P9WFZ5	46.6667	66.6667	20	20
P9WG25	46.6667	66.6667	20	13.3333
P9WG27	60	60	13.3333	20
P9WG29	26.6667	73.3333	66.6667	26.6667
P9WG35	40	73.3333	26.6667	20
P9WG39	53.3333	53.3333	0	26.6667
P9WG41	66.6667	46.6667	6.66667	26.6667
P9WG43	46.6667	60	26.6667	26.6667
P9WG45	80	33.3333	6.66667	40
P9WG47	26.6667	40	20	6.66667
P9WG49	73.3333	86.6667	0	6.66667
P9WG57	53.3333	60	26.6667	13.3333
P9WG59	46.6667	46.6667	20	46.6667
P9WG67	46.6667	40	13.3333	40
P9WGB7	66.6667	46.6667	6.66667	33.3333
P9WGD7	53.3333	53.3333	26.6667	33.3333
P9WGD9	40	53.3333	46.6667	40
P9WGE7	33.3333	60	33.3333	26.6667
P9WGE9	53.3333	66.6667	6.66667	26.6667
P9WGG1	40	60	33.3333	26.6667
P9WGG3	66.6667	60	26.6667	40
P9WGG7	60	46.6667	20	26.6667
P9WGH1	46.6667	46.6667	13.3333	20
P9WGH9	53.3333	80	20	13.3333
P9WGI1	60	46.6667	6.66667	33.3333
P9WGI3	80	60	0	33.3333
P9WGI5	53.3333	66.6667	6.66667	20
P9WGI7	20	53.3333	26.6667	33.3333
P9WGI9	53.3333	46.6667	6.66667	46.6667
P9WGJ9	53.3333	46.6667	26.6667	20
P9WGK1	53.3333	53.3333	6.66667	26.6667
P9WGK3	40	66.6667	13.3333	26.6667
P9WGK5	40	80	46.6667	13.3333
P9WGK9	73.3333	80	20	13.3333
P9WGL1	53.3333	60	26.6667	20
P9WGL3	20	46.6667	53.3333	33.3333
P9WGL5	33.3333	46.6667	33.3333	46.6667
P9WGL9	40	40	33.3333	46.6667
P9WGM1	26.6667	33.3333	33.3333	46.6667
P9WGM3	53.3333	40	6.66667	33.3333
P9WGM7	26.6667	53.3333	26.6667	40
P9WGM9	33.3333	46.6667	40	33.3333
P9WGP3	40	46.6667	33.3333	33.3333
P9WGP5	53.3333	93.3333	33.3333	6.66667
P9WGR1	40	40	40	33.3333
P9WGS9	26.6667	46.6667	46.6667	46.6667
P9WGT1	60	53.3333	33.3333	33.3333
P9WGT3	60	53.3333	13.3333	20
P9WGT7	53.3333	53.3333	33.3333	26.6667
P9WGU1	33.3333	46.6667	40	40
P9WGU9	60	66.6667	26.6667	20
P9WGV3	26.6667	46.6667	26.6667	33.3333
P9WGX7	46.6667	60	13.3333	26.6667
P9WGY9	53.3333	53.3333	26.6667	26.6667
P9WGZ9	53.3333	40	20	40
P9WH11	53.3333	60	26.6667	20
P9WH13	53.3333	46.6667	33.3333	40
P9WH69	60	60	13.3333	13.3333
P9WH71	40	26.6667	26.6667	40
P9WH75	60	46.6667	20	40
P9WHF1	46.6667	53.3333	26.6667	33.3333
P9WHF3	33.3333	46.6667	13.3333	20
P9WHG9	46.6667	40	20	40
P9WHH1	46.6667	60	13.3333	13.3333
P9WHH3	40	53.3333	26.6667	40
P9WHH7	46.6667	46.6667	40	26.6667
P9WHH9	40	26.6667	33.3333	46.6667
P9WHJ3	53.3333	40	20	26.6667
P9WHK7	46.6667	80	20	13.3333
P9WHN5	73.3333	60	0	26.6667
P9WHQ9	53.3333	40	13.3333	40
P9WHR3	53.3333	60	20	26.6667
P9WHR9	40	60	40	26.6667
P9WHS1	33.3333	46.6667	53.3333	33.3333
P9WHS3	20	26.6667	60	46.6667
P9WHT9	40	73.3333	33.3333	6.66667
P9WHU1	60	73.3333	26.6667	13.3333
P9WHV7	33.3333	53.3333	33.3333	40
P9WHW5	46.6667	80	33.3333	13.3333
P9WHY3	46.6667	53.3333	26.6667	26.6667
P9WI55	46.6667	66.6667	26.6667	20
P9WI63	53.3333	53.3333	26.6667	33.3333
P9WI65	33.3333	53.3333	20	40
P9WI67	60	40	26.6667	46.6667
P9WI69	40	60	40	6.66667
P9WI71	60	60	13.3333	26.6667
P9WI73	80	33.3333	0	26.6667
P9WI75	46.6667	73.3333	33.3333	20
P9WI77	66.6667	40	6.66667	46.6667
P9WI79	60	40	26.6667	33.3333
P9WI81	46.6667	40	20	33.3333
P9WI83	53.3333	66.6667	33.3333	20
P9WIA1	20	46.6667	40	26.6667
P9WIB3	53.3333	60	13.3333	20
P9WIB5	60	60	26.6667	20
P9WIB9	46.6667	53.3333	33.3333	26.6667
P9WIC1	66.6667	46.6667	6.66667	46.6667
P9WIC7	46.6667	40	20	40
P9WID3	60	46.6667	20	33.3333
P9WID5	26.6667	60	26.6667	33.3333
P9WID7	46.6667	53.3333	33.3333	33.3333
P9WIE3	33.3333	46.6667	26.6667	26.6667
P9WIE5	53.3333	33.3333	6.66667	33.3333
P9WIF5	46.6667	60	40	20
P9WIH3	40	53.3333	13.3333	26.6667
P9WIH9	53.3333	40	26.6667	40
P9WII3	46.6667	33.3333	40	40
P9WIK3	60	60	13.3333	26.6667
P9WIL3	40	60	26.6667	26.6667
P9WIL5	40	53.3333	33.3333	26.6667
P9WIL7	60	60	13.3333	26.6667
P9WIN5	60	40	26.6667	46.6667
P9WIP7	26.6667	46.6667	33.3333	26.6667
P9WIQ1	40	53.3333	33.3333	26.6667
P9WIQ3	60	53.3333	33.3333	46.6667
P9WIR7	46.6667	60	20	6.66667
P9WIS5	46.6667	53.3333	33.3333	33.3333
P9WIS7	53.3333	60	26.6667	26.6667
P9WIS9	33.3333	73.3333	13.3333	6.66667
P9WIU5	60	60	6.66667	26.6667
P9WIU7	33.3333	40	33.3333	40
P9WIV9	53.3333	53.3333	13.3333	40
P9WJ03	66.6667	53.3333	6.66667	33.3333
P9WJ61	33.3333	40	46.6667	46.6667
P9WJ63	66.6667	66.6667	20	20
P9WJ67	46.6667	46.6667	13.3333	40
P9WJ69	40	53.3333	6.66667	33.3333
P9WJ93	40	60	26.6667	20
P9WJA1	60	40	20	26.6667
P9WJA3	26.6667	53.3333	26.6667	40
P9WJA7	33.3333	46.6667	40	33.3333
P9WJA9	33.3333	73.3333	6.66667	0
P9WJB5	40	60	40	26.6667
P9WJB7	33.3333	53.3333	26.6667	26.6667
P9WJD9	40	73.3333	26.6667	13.3333
P9WJE1	40	53.3333	33.3333	33.3333
P9WJF1	40	46.6667	20	40
P9WJH7	40	73.3333	33.3333	26.6667
P9WJI5	26.6667	66.6667	40	20
P9WJJ3	40	53.3333	40	33.3333
P9WJK3	80	60	6.66667	26.6667
P9WJM7	46.6667	33.3333	20	26.6667
P9WJN1	40	73.3333	20	20
P9WJN3	40	46.6667	26.6667	26.6667
P9WJN5	46.6667	73.3333	40	0
P9WJQ1	46.6667	66.6667	26.6667	26.6667
P9WJQ3	40	53.3333	33.3333	33.3333
P9WJU7	60	53.3333	26.6667	26.6667
P9WJV5	33.3333	66.6667	53.3333	26.6667
P9WJW3	46.6667	60	26.6667	26.6667
P9WJY3	73.3333	66.6667	20	26.6667
P9WK09	33.3333	46.6667	33.3333	33.3333
P9WK17	40	80	33.3333	0
P9WK19	60	13.3333	20	53.3333
P9WK21	66.6667	33.3333	26.6667	33.3333
P9WK45	53.3333	66.6667	26.6667	26.6667
P9WK47	60	53.3333	20	26.6667
P9WK61	53.3333	46.6667	33.3333	33.3333
P9WK65	40	40	33.3333	33.3333
P9WK83	53.3333	60	26.6667	26.6667
P9WK87	40	66.6667	26.6667	20
P9WKC3	26.6667	66.6667	46.6667	0
P9WKC7	20	53.3333	33.3333	33.3333
P9WKC9	33.3333	60	26.6667	33.3333
P9WKD1	40	73.3333	33.3333	26.6667
P9WKD3	53.3333	53.3333	26.6667	40
P9WKD7	46.6667	73.3333	26.6667	13.3333
P9WKE1	53.3333	66.6667	26.6667	20
P9WKE3	20	40	26.6667	33.3333
P9WKE5	46.6667	26.6667	26.6667	33.3333
P9WKF5	60	53.3333	26.6667	26.6667
P9WKH1	60	46.6667	13.3333	33.3333
P9WKH3	53.3333	46.6667	33.3333	33.3333
P9WKI7	53.3333	40	20	26.6667
P9WKI9	60	53.3333	13.3333	33.3333
P9WKJ1	33.3333	53.3333	20	40
P9WKJ5	53.3333	53.3333	13.3333	46.6667
P9WKJ7	26.6667	40	33.3333	26.6667
P9WKK7	66.6667	53.3333	20	13.3333
P9WKL5	26.6667	53.3333	46.6667	40
P9WKQ1	53.3333	33.3333	33.3333	46.6667
P9WKY5	46.6667	53.3333	26.6667	26.6667
P9WKZ1	40	73.3333	33.3333	20
P9WKZ3	13.3333	60	40	40
P9WLH5	60	46.6667	20	33.3333
P9WLL7	26.6667	53.3333	20	33.3333
P9WLP9	46.6667	46.6667	26.6667	33.3333
P9WLZ7	53.3333	46.6667	13.3333	33.3333
P9WM39	46.6667	80	26.6667	13.3333
P9WM67	33.3333	66.6667	26.6667	26.6667
P9WMC1	73.3333	26.6667	6.66667	46.6667
P9WMF5	53.3333	86.6667	26.6667	13.3333
P9WMF9	26.6667	73.3333	46.6667	13.3333
P9WMH1	20	46.6667	33.3333	26.6667
P9WMH3	53.3333	66.6667	33.3333	26.6667
P9WMH7	46.6667	46.6667	40	46.6667
P9WMI9	53.3333	80	26.6667	6.66667
P9WMJ9	40	46.6667	26.6667	26.6667
P9WMK1	46.6667	60	26.6667	13.3333
P9WMK5	20	53.3333	26.6667	26.6667
P9WMK7	40	86.6667	26.6667	0
P9WMK9	40	60	0	20
P9WMN3	40	66.6667	33.3333	6.66667
P9WMN7	60	40	26.6667	33.3333
P9WMP9	46.6667	53.3333	26.6667	33.3333
P9WMQ1	66.6667	40	6.66667	26.6667
P9WMQ3	53.3333	46.6667	26.6667	40
P9WMR3	46.6667	46.6667	20	26.6667
P9WMS7	53.3333	46.6667	20	33.3333
P9WMT1	40	86.6667	33.3333	0
P9WMU1	40	53.3333	26.6667	13.3333
P9WMU9	26.6667	73.3333	13.3333	6.66667
P9WMW9	60	53.3333	20	26.6667
P9WMX3	40	86.6667	33.3333	13.3333
P9WMY3	33.3333	73.3333	40	20
P9WMZ1	46.6667	40	33.3333	46.6667
P9WMZ5	40	66.6667	40	26.6667
P9WN03	73.3333	66.6667	6.66667	33.3333
P9WN11	73.3333	66.6667	13.3333	20
P9WN21	73.3333	46.6667	6.66667	33.3333
P9WN23	53.3333	40	26.6667	33.3333
P9WN25	60	46.6667	33.3333	26.6667
P9WN29	66.6667	40	20	40
P9WN39	40	33.3333	20	46.6667
P9WN45	66.6667	40	13.3333	46.6667
P9WN69	46.6667	66.6667	20	20
P9WN83	46.6667	33.3333	33.3333	46.6667
P9WN85	73.3333	40	13.3333	33.3333
P9WN93	40	53.3333	20	26.6667
P9WN95	33.3333	40	40	20
P9WN99	46.6667	60	26.6667	26.6667
P9WNB1	46.6667	80	33.3333	20
P9WNB3	46.6667	60	13.3333	20
P9WNB9	46.6667	33.3333	20	53.3333
P9WNC1	40	46.6667	20	33.3333
P9WNC3	60	73.3333	33.3333	26.6667
P9WNC5	46.6667	73.3333	26.6667	26.6667
P9WND1	40	60	33.3333	26.6667
P9WNE1	66.6667	60	26.6667	33.3333
P9WNE5	46.6667	86.6667	20	6.66667
P9WNF9	33.3333	66.6667	40	26.6667
P9WNG3	53.3333	66.6667	20	26.6667
P9WNH5	46.6667	46.6667	20	33.3333
P9WNK5	60	73.3333	6.66667	13.3333
P9WNK7	60	53.3333	20	13.3333
P9WNL7	66.6667	66.6667	6.66667	26.6667
P9WNM5	33.3333	60	26.6667	26.6667
P9WNP3	60	60	20	40
P9WNP5	73.3333	60	13.3333	33.3333
P9WNP7	60	66.6667	26.6667	26.6667
P9WNR7	46.6667	86.6667	33.3333	6.66667
P9WNU7	46.6667	53.3333	26.6667	33.3333
P9WNU9	53.3333	60	33.3333	26.6667
P9WNV1	60	60	13.3333	20
P9WNV3	53.3333	73.3333	13.3333	20
P9WNV5	26.6667	46.6667	33.3333	26.6667
P9WNW5	53.3333	66.6667	20	20
P9WNW7	46.6667	46.6667	33.3333	33.3333
P9WNW9	46.6667	66.6667	26.6667	20
P9WNX1	40	60	33.3333	33.3333
P9WNX5	53.3333	33.3333	33.3333	40
P9WNZ1	40	40	40	46.6667
P9WNZ3	20	60	33.3333	13.3333
P9WP15	60	40	20	40
P9WP17	53.3333	60	26.6667	20
P9WP19	33.3333	40	33.3333	26.6667
P9WP21	46.6667	46.6667	26.6667	20
P9WP23	60	40	26.6667	40
P9WP25	33.3333	53.3333	33.3333	26.6667
P9WP31	53.3333	40	20	26.6667
P9WP43	40	60	46.6667	13.3333
P9WP49	66.6667	66.6667	13.3333	0
P9WP53	40	53.3333	26.6667	26.6667
P9WP55	46.6667	46.6667	26.6667	33.3333
P9WP65	53.3333	60	20	20
P9WP79	53.3333	46.6667	20	40
P9WPA3	60	53.3333	26.6667	33.3333
P9WPA5	40	46.6667	33.3333	20
P9WPA9	60	53.3333	26.6667	33.3333
P9WPB3	40	40	26.6667	33.3333
P9WPB5	53.3333	26.6667	6.66667	46.6667
P9WPB7	46.6667	33.3333	20	46.6667
P9WPE5	40	40	40	53.3333
P9WPE7	60	60	20	13.3333
P9WPE9	53.3333	46.6667	20	0
P9WPF1	80	40	6.66667	40
P9WPF3	53.3333	40	33.3333	46.6667
P9WPG7	60	66.6667	33.3333	13.3333
P9WPH3	33.3333	53.3333	20	26.6667
P9WPH9	46.6667	53.3333	26.6667	20
P9WPI9	93.3333	46.6667	0	26.6667
P9WPJ9	53.3333	46.6667	20	33.3333
P9WPL5	33.3333	53.3333	26.6667	33.3333
P9WPP1	46.6667	40	26.6667	33.3333
P9WPP3	40	40	20	40
P9WPP7	46.6667	53.3333	33.3333	40
P9WPP9	60	60	20	33.3333
P9WPQ5	33.3333	53.3333	33.3333	33.3333
P9WPQ9	40	66.6667	33.3333	26.6667
P9WPS3	33.3333	60	40	20
P9WPT5	46.6667	46.6667	26.6667	40
P9WPU1	46.6667	66.6667	13.3333	13.3333
P9WPX3	53.3333	60	33.3333	20
P9WPX5	33.3333	46.6667	26.6667	33.3333
P9WPX7	33.3333	40	40	46.6667
P9WPY1	53.3333	80	26.6667	13.3333
P9WPY3	66.6667	66.6667	26.6667	26.6667
P9WPY5	60	93.3333	13.3333	0
P9WPZ3	46.6667	53.3333	20	26.6667
P9WQ17	53.3333	60	26.6667	26.6667
P9WQ19	60	66.6667	13.3333	20
P9WQ35	73.3333	73.3333	13.3333	13.3333
P9WQ37	46.6667	53.3333	26.6667	33.3333
P9WQ41	60	60	20	26.6667
P9WQ43	53.3333	53.3333	26.6667	33.3333
P9WQ47	40	53.3333	40	26.6667
P9WQ51	40	53.3333	33.3333	13.3333
P9WQ55	66.6667	66.6667	13.3333	20
P9WQ59	66.6667	53.3333	26.6667	33.3333
P9WQ61	60	46.6667	20	33.3333
P9WQ63	46.6667	40	33.3333	26.6667
P9WQ73	40	33.3333	26.6667	53.3333
P9WQ75	40	46.6667	33.3333	20
P9WQ81	60	53.3333	20	33.3333
P9WQ87	60	46.6667	13.3333	40
P9WQA9	53.3333	66.6667	20	13.3333
P9WQB1	46.6667	46.6667	20	33.3333
P9WQB3	53.3333	66.6667	13.3333	26.6667
P9WQB5	66.6667	66.6667	26.6667	26.6667
P9WQB7	40	60	40	20
P9WQD1	73.3333	40	13.3333	33.3333
P9WQD5	60	40	20	26.6667
P9WQD7	33.3333	46.6667	46.6667	40
P9WQD9	60	46.6667	20	40
P9WQE1	53.3333	60	26.6667	20
P9WQE3	66.6667	86.6667	13.3333	6.66667
P9WQE5	53.3333	66.6667	13.3333	26.6667
P9WQE7	46.6667	73.3333	26.6667	20
P9WQE9	73.3333	73.3333	6.66667	13.3333
P9WQH3	60	66.6667	26.6667	26.6667
P9WQH5	53.3333	73.3333	20	13.3333
P9WQH7	60	60	6.66667	26.6667
P9WQI3	33.3333	46.6667	33.3333	20
P9WQI9	60	73.3333	26.6667	26.6667
P9WQJ7	33.3333	66.6667	33.3333	26.6667
P9WQJ9	60	73.3333	26.6667	13.3333
P9WQK7	46.6667	73.3333	26.6667	6.66667
P9WQL9	33.3333	53.3333	26.6667	20
P9WQN3	33.3333	66.6667	26.6667	6.66667
P9WQN5	73.3333	53.3333	13.3333	26.6667
P9WQN9	53.3333	80	26.6667	6.66667
P9WQP1	53.3333	60	26.6667	20
P9WQP3	46.6667	73.3333	26.6667	6.66667
P9WQP7	46.6667	73.3333	20	6.66667
Q50631	40	33.3333	26.6667	60
Q6MWZ7	40	60	33.3333	26.6667
Q6MX01	53.3333	80	26.6667	6.66667
Q79FC3	46.6667	60	33.3333	20
Q79FV4	60	33.3333	20	33.3333
Q79FW0	40	46.6667	33.3333	40
Q79FW5	53.3333	53.3333	33.3333	46.6667
Q79FX6	26.6667	33.3333	26.6667	46.6667
Q79FX8	60	46.6667	6.66667	40
I6WZK7	60	33.3333	13.3333	40
I6X8R5	46.6667	66.6667	20	26.6667
I6XEI5	53.3333	46.6667	26.6667	40
I6XHI0	40	40	46.6667	20
I6Y204	46.6667	53.3333	26.6667	33.3333
I6Y3T7	53.3333	46.6667	26.6667	33.3333
I6Y8I5	40	40	33.3333	33.3333
I6YBZ8	46.6667	46.6667	20	40
I6YEJ7	80	60	6.66667	13.3333
I6YF08	26.6667	66.6667	60	33.3333
I6YGF8	53.3333	40	26.6667	40
L0TCG5	53.3333	73.3333	26.6667	0
L7N697	46.6667	46.6667	33.3333	40
L7N6A5	40	46.6667	33.3333	40
L7N6B0	60	60	26.6667	20
O05572	46.6667	40	26.6667	33.3333
O05779	33.3333	53.3333	26.6667	26.6667
O05797	60	46.6667	20	33.3333
O05892	60	40	20	40
O06159	53.3333	40	26.6667	40
O06291	33.3333	40	13.3333	20
O06334	26.6667	46.6667	26.6667	33.3333
O06401	46.6667	46.6667	20	33.3333
O06417	53.3333	73.3333	20	26.6667
O06553	40	46.6667	40	33.3333
O06581	46.6667	66.6667	26.6667	20
O07434	46.6667	73.3333	13.3333	26.6667
O07436	60	40	13.3333	26.6667
O07747	53.3333	53.3333	13.3333	40
O07776	66.6667	66.6667	0	20
O07777	46.6667	60	40	20
O07778	46.6667	46.6667	33.3333	0
O07801	40	60	33.3333	26.6667
O33259	20	33.3333	26.6667	40
O33347	46.6667	66.6667	33.3333	20
O33361	40	60	20	33.3333
O50440	46.6667	73.3333	46.6667	26.6667
O50461	33.3333	73.3333	20	13.3333
O53165	66.6667	46.6667	13.3333	40
O53182	66.6667	73.3333	0	13.3333
O53203	46.6667	66.6667	20	13.3333
O53368	53.3333	40	6.66667	40
O53380	46.6667	53.3333	46.6667	20
O53478	60	40	20	26.6667
O53505	53.3333	66.6667	20	6.66667
O53507	46.6667	66.6667	26.6667	13.3333
O53509	73.3333	66.6667	13.3333	20
O53521	53.3333	60	26.6667	26.6667
O53554	40	40	26.6667	46.6667
O53578	33.3333	46.6667	26.6667	46.6667
O53590	60	40	33.3333	40
O53604	60	46.6667	26.6667	46.6667
O53605	40	33.3333	26.6667	33.3333
O53611	40	66.6667	26.6667	20
O53637	60	40	33.3333	40
O53645	33.3333	46.6667	40	40
O53780	40	33.3333	33.3333	20
O53838	46.6667	66.6667	20	20
O53907	46.6667	53.3333	33.3333	40
O69721	40	60	40	26.6667
O86312	60	73.3333	13.3333	20
O86331	33.3333	66.6667	33.3333	26.6667
O86372	66.6667	40	20	46.6667
P71592	40	60	33.3333	33.3333
P71650	46.6667	40	26.6667	40
P71658	60	73.3333	20	20
P71668	46.6667	40	13.3333	40
P71741	53.3333	66.6667	13.3333	6.66667
P71814	53.3333	46.6667	20	40
P71864	40	60	40	26.6667
P71905	73.3333	73.3333	6.66667	20
P95004	33.3333	60	40	26.6667
P95189	33.3333	33.3333	26.6667	33.3333
P95251	73.3333	53.3333	13.3333	33.3333
P96218	46.6667	46.6667	26.6667	20
P96285	73.3333	66.6667	13.3333	26.6667
P96402	60	60	20	26.6667
P96809	53.3333	33.3333	26.6667	40
P96855	53.3333	46.6667	20	46.6667
P96917	40	53.3333	26.6667	40
P9WF11	46.6667	66.6667	26.6667	26.6667
P9WF21	46.6667	33.3333	13.3333	26.6667
P9WF25	66.6667	66.6667	26.6667	13.3333
P9WF37	46.6667	60	26.6667	20
P9WFB9	40	66.6667	33.3333	6.66667
P9WFC7	46.6667	60	26.6667	20
P9WFS9	60	60	6.66667	20
P9WFU5	40	80	33.3333	20
P9WFV3	53.3333	53.3333	13.3333	33.3333
P9WFX5	86.6667	60	6.66667	40
P9WFZ1	60	80	26.6667	13.3333
P9WG23	53.3333	46.6667	20	46.6667
P9WG31	53.3333	46.6667	13.3333	33.3333
P9WG37	46.6667	60	20	33.3333
P9WG51	60	60	33.3333	13.3333
P9WG55	53.3333	73.3333	26.6667	0
P9WG69	46.6667	66.6667	26.6667	26.6667
P9WG75	46.6667	73.3333	33.3333	13.3333
P9WG77	53.3333	60	20	33.3333
P9WGC5	46.6667	66.6667	33.3333	6.66667
P9WGE1	33.3333	46.6667	20	26.6667
P9WGE5	66.6667	26.6667	6.66667	26.6667
P9WGG5	60	33.3333	20	40
P9WGG9	40	53.3333	40	33.3333
P9WGH5	73.3333	46.6667	13.3333	40
P9WGH7	46.6667	40	26.6667	33.3333
P9WGK7	46.6667	66.6667	33.3333	33.3333
P9WGM5	53.3333	66.6667	26.6667	20
P9WGN1	26.6667	53.3333	46.6667	26.6667
P9WGT9	66.6667	66.6667	26.6667	26.6667
P9WGV1	60	46.6667	20	33.3333
P9WGW3	46.6667	73.3333	40	26.6667
P9WGX5	33.3333	60	26.6667	26.6667
P9WGY7	26.6667	46.6667	46.6667	33.3333
P9WGZ1	40	60	33.3333	20
P9WH03	46.6667	53.3333	33.3333	20
P9WH09	66.6667	53.3333	20	13.3333
P9WH15	60	73.3333	20	26.6667
P9WH23	46.6667	46.6667	20	33.3333
P9WH43	46.6667	73.3333	20	20
P9WH77	73.3333	60	13.3333	26.6667
P9WHE9	60	53.3333	20	26.6667
P9WHJ1	40	66.6667	26.6667	20
P9WHJ5	60	66.6667	26.6667	33.3333
P9WHK5	73.3333	53.3333	6.66667	26.6667
P9WHL7	53.3333	60	20	33.3333
P9WHM5	73.3333	46.6667	20	26.6667
P9WHP5	40	73.3333	40	13.3333
P9WHQ7	46.6667	60	20	26.6667
P9WHR7	53.3333	33.3333	6.66667	46.6667
P9WHU5	33.3333	46.6667	33.3333	33.3333
P9WHV5	26.6667	80	40	0
P9WHV9	46.6667	60	13.3333	13.3333
P9WHW3	40	40	20	33.3333
P9WHW9	40	40	26.6667	13.3333
P9WI27	26.6667	73.3333	40	20
P9WI47	53.3333	40	20	13.3333
P9WI87	33.3333	93.3333	46.6667	0
P9WI95	60	60	20	33.3333
P9WIA9	46.6667	60	33.3333	13.3333
P9WIB1	66.6667	73.3333	20	26.6667
P9WIC3	46.6667	66.6667	33.3333	13.3333
P9WIC5	40	53.3333	33.3333	26.6667
P9WIC9	46.6667	93.3333	26.6667	6.66667
P9WIE1	53.3333	53.3333	6.66667	26.6667
P9WIG3	60	60	33.3333	20
P9WIG7	46.6667	53.3333	13.3333	26.6667
P9WII5	46.6667	46.6667	33.3333	33.3333
P9WII7	46.6667	40	33.3333	40
P9WII9	60	53.3333	6.66667	33.3333
P9WIJ1	33.3333	60	20	26.6667
P9WIK1	53.3333	66.6667	20	20
P9WIK5	26.6667	66.6667	40	26.6667
P9WIK7	33.3333	46.6667	26.6667	20
P9WIK9	46.6667	33.3333	33.3333	40
P9WIN1	60	46.6667	0	20
P9WIP3	66.6667	60	20	40
P9WIP9	40	86.6667	26.6667	6.66667
P9WIS1	53.3333	46.6667	13.3333	40
P9WIT3	53.3333	33.3333	33.3333	40
P9WIT9	40	46.6667	26.6667	46.6667
P9WIX5	40	53.3333	33.3333	46.6667
P9WIX9	66.6667	66.6667	20	26.6667
P9WIY1	40	53.3333	46.6667	20
P9WIY3	80	53.3333	6.66667	20
P9WIZ5	53.3333	13.3333	33.3333	60
P9WIZ7	53.3333	60	6.66667	40
P9WJ71	53.3333	73.3333	20	6.66667
P9WJ73	26.6667	60	33.3333	13.3333
P9WJ83	46.6667	46.6667	40	20
P9WJ87	40	33.3333	26.6667	33.3333
P9WJ99	53.3333	66.6667	33.3333	20
P9WJA5	53.3333	60	20	26.6667
P9WJC3	60	46.6667	20	13.3333
P9WJC5	46.6667	66.6667	20	20
P9WJD5	26.6667	46.6667	20	20
P9WJD7	40	53.3333	33.3333	26.6667
P9WJF5	26.6667	60	46.6667	33.3333
P9WJI7	33.3333	73.3333	40	13.3333
P9WJI9	86.6667	66.6667	0	20
P9WJJ7	60	26.6667	26.6667	40
P9WJL3	66.6667	73.3333	20	26.6667
P9WJM1	53.3333	46.6667	26.6667	46.6667
P9WJM5	46.6667	73.3333	33.3333	20
P9WJM9	53.3333	33.3333	40	46.6667
P9WJR9	33.3333	66.6667	26.6667	26.6667
P9WJS3	53.3333	46.6667	13.3333	13.3333
P9WJS7	33.3333	40	53.3333	40
P9WJU5	46.6667	20	26.6667	46.6667
P9WJV3	46.6667	73.3333	6.66667	13.3333
P9WJY7	46.6667	73.3333	33.3333	13.3333
P9WJZ7	53.3333	46.6667	0	40
P9WK15	53.3333	60	13.3333	20
P9WK41	33.3333	33.3333	53.3333	40
P9WK91	60	73.3333	33.3333	20
P9WKA5	60	53.3333	26.6667	33.3333
P9WKA7	53.3333	66.6667	20	20
P9WKA9	53.3333	80	26.6667	6.66667
P9WKB1	26.6667	73.3333	40	6.66667
P9WKB5	46.6667	60	26.6667	26.6667
P9WKB9	60	60	26.6667	6.66667
P9WKC5	46.6667	33.3333	33.3333	33.3333
P9WKD5	46.6667	53.3333	13.3333	26.6667
P9WKD9	40	66.6667	40	13.3333
P9WKE9	66.6667	60	6.66667	33.3333
P9WKF7	53.3333	60	26.6667	6.66667
P9WKG1	46.6667	60	26.6667	33.3333
P9WKG5	40	53.3333	26.6667	40
P9WKG7	46.6667	66.6667	20	26.6667
P9WKG9	60	40	33.3333	40
P9WKI1	73.3333	53.3333	6.66667	33.3333
P9WKI3	33.3333	73.3333	26.6667	20
P9WKJ3	40	66.6667	26.6667	20
P9WKK9	53.3333	60	33.3333	26.6667
P9WKL1	60	40	26.6667	33.3333
P9WKV3	33.3333	60	60	0
P9WKX3	33.3333	60	26.6667	20
P9WL45	33.3333	53.3333	33.3333	33.3333
P9WM25	60	33.3333	26.6667	53.3333
P9WM53	66.6667	53.3333	13.3333	33.3333
P9WMB5	60	73.3333	26.6667	20
P9WME9	40	66.6667	40	20
P9WMI1	53.3333	46.6667	26.6667	33.3333
P9WMJ3	40	66.6667	40	20
P9WMJ5	46.6667	73.3333	26.6667	0
P9WMM5	40	60	46.6667	26.6667
P9WMN1	60	53.3333	26.6667	40
P9WMQ5	60	66.6667	13.3333	6.66667
P9WMR7	46.6667	53.3333	33.3333	40
P9WMS9	33.3333	33.3333	46.6667	60
P9WMV9	40	53.3333	40	33.3333
P9WMW5	53.3333	33.3333	33.3333	33.3333
P9WMY7	53.3333	66.6667	20	20
P9WMZ3	40	60	33.3333	20
P9WN05	60	46.6667	20	40
P9WN27	53.3333	60	26.6667	33.3333
P9WN37	53.3333	40	26.6667	40
P9WN43	46.6667	53.3333	40	46.6667
P9WN49	46.6667	46.6667	46.6667	26.6667
P9WN65	40	73.3333	33.3333	13.3333
P9WN87	53.3333	46.6667	20	26.6667
P9WN97	40	73.3333	20	20
P9WNA5	73.3333	46.6667	13.3333	33.3333
P9WND9	53.3333	20	26.6667	40
P9WNE3	46.6667	80	40	20
P9WNE9	33.3333	40	20	40
P9WNF3	66.6667	33.3333	20	33.3333
P9WNF7	33.3333	60	40	20
P9WNG5	66.6667	53.3333	20	26.6667
P9WNK3	40	66.6667	26.6667	6.66667
P9WNL1	53.3333	53.3333	33.3333	33.3333
P9WNL5	66.6667	66.6667	20	26.6667
P9WNL9	53.3333	66.6667	13.3333	26.6667
P9WNN1	53.3333	60	20	26.6667
P9WNQ7	80	20	6.66667	53.3333
P9WNS1	46.6667	80	13.3333	6.66667
P9WNS3	53.3333	46.6667	26.6667	26.6667
P9WNS5	40	73.3333	33.3333	6.66667
P9WNT3	26.6667	60	40	13.3333
P9WNT5	33.3333	60	40	26.6667
P9WNT9	60	53.3333	33.3333	26.6667
P9WNU1	26.6667	33.3333	26.6667	46.6667
P9WNV7	46.6667	60	33.3333	26.6667
P9WNV9	53.3333	73.3333	33.3333	13.3333
P9WNW1	60	60	20	20
P9WNW3	33.3333	60	20	20
P9WNX3	46.6667	46.6667	40	40
P9WNY9	40	66.6667	33.3333	26.6667
P9WNZ5	53.3333	60	26.6667	33.3333
P9WNZ7	40	60	33.3333	13.3333
P9WP33	26.6667	53.3333	33.3333	26.6667
P9WP37	60	60	26.6667	6.66667
P9WP41	33.3333	53.3333	26.6667	26.6667
P9WP51	53.3333	60	26.6667	33.3333
P9WP69	66.6667	66.6667	20	20
P9WP77	73.3333	60	13.3333	20
P9WPB1	66.6667	40	26.6667	33.3333
P9WPB9	46.6667	86.6667	33.3333	6.66667
P9WPC3	60	46.6667	20	33.3333
P9WPC5	53.3333	40	13.3333	26.6667
P9WPC9	40	93.3333	40	0
P9WPF5	53.3333	40	40	46.6667
P9WPF7	53.3333	40	26.6667	53.3333
P9WPF9	53.3333	60	33.3333	13.3333
P9WPH1	46.6667	46.6667	26.6667	46.6667
P9WPI3	66.6667	60	13.3333	40
P9WPJ1	60	73.3333	20	26.6667
P9WPJ7	13.3333	33.3333	33.3333	40
P9WPK3	33.3333	60	33.3333	33.3333
P9WPK5	40	46.6667	40	40
P9WPN5	46.6667	53.3333	20	40
P9WPQ3	33.3333	53.3333	40	33.3333
P9WPQ7	53.3333	46.6667	0	33.3333
P9WPU7	46.6667	86.6667	26.6667	13.3333
P9WPV9	53.3333	60	33.3333	26.6667
P9WPW1	46.6667	60	20	20
P9WPX9	33.3333	46.6667	33.3333	40
P9WPZ5	40	66.6667	33.3333	26.6667
P9WPZ7	46.6667	60	6.66667	33.3333
P9WQ01	53.3333	46.6667	26.6667	26.6667
P9WQ09	53.3333	53.3333	20	26.6667
P9WQ11	60	46.6667	26.6667	33.3333
P9WQ23	60	66.6667	33.3333	33.3333
P9WQ71	40	93.3333	13.3333	6.66667
P9WQA3	53.3333	40	26.6667	26.6667
P9WQA5	66.6667	46.6667	13.3333	20
P9WQB9	53.3333	40	26.6667	33.3333
P9WQD3	33.3333	60	46.6667	20
P9WQF1	40	66.6667	26.6667	26.6667
P9WQF3	53.3333	66.6667	33.3333	20
P9WQG9	26.6667	40	20	33.3333
P9WQK3	46.6667	60	26.6667	13.3333
P9WQK9	66.6667	60	20	20
P9WQL1	26.6667	60	40	20
P9WQL7	53.3333	33.3333	20	40
P9WQM1	40	46.6667	33.3333	26.6667
Q10896	46.6667	13.3333	26.6667	60
Q6MWW2	46.6667	46.6667	33.3333	40
Q79FE1	46.6667	60	26.6667	13.3333
Q79FP0	46.6667	60	33.3333	26.6667
Q79FR5	46.6667	46.6667	20	26.6667
Q79FZ9	53.3333	40	20	33.3333
I6X486	40	46.6667	33.3333	20
I6X5C9	60	53.3333	26.6667	13.3333
I6X7F9	46.6667	60	33.3333	13.3333
I6X9S5	33.3333	73.3333	40	13.3333
I6XEK6	60	46.6667	13.3333	26.6667
I6XHJ3	40	46.6667	26.6667	33.3333
I6XI14	26.6667	60	46.6667	33.3333
I6Y3V5	53.3333	66.6667	33.3333	33.3333
I6Y4C7	60	60	20	33.3333
I6Y4V6	66.6667	73.3333	6.66667	20
I6Y8F7	46.6667	60	13.3333	13.3333
I6Y8S6	40	40	40	26.6667
I6YA32	40	53.3333	20	33.3333
I6YA50	66.6667	66.6667	26.6667	26.6667
I6YC03	40	40	33.3333	40
I6YC53	33.3333	66.6667	33.3333	13.3333
I6YC58	33.3333	73.3333	40	13.3333
I6YCF0	53.3333	46.6667	26.6667	40
I6YCF5	60	66.6667	13.3333	33.3333
I6YDK7	53.3333	46.6667	20	33.3333
I6YEE1	66.6667	86.6667	13.3333	13.3333
I6YEU0	46.6667	40	40	40
I6YGS0	46.6667	40	20	46.6667
L0T5T4	80	40	13.3333	33.3333
L0T864	66.6667	66.6667	13.3333	20
L0TDE1	53.3333	46.6667	26.6667	40
L7N653	66.6667	73.3333	13.3333	20
L7N675	53.3333	66.6667	26.6667	20
L7N680	53.3333	60	33.3333	33.3333
L7N689	60	46.6667	6.66667	33.3333
L7N695	60	66.6667	26.6667	20
O05458	73.3333	66.6667	13.3333	26.6667
O05598	46.6667	53.3333	13.3333	26.6667
O06136	60	40	20	53.3333
O06307	40	60	20	26.6667
O06335	46.6667	53.3333	20	26.6667
O06380	46.6667	26.6667	26.6667	40
O06560	33.3333	66.6667	20	26.6667
O06563	33.3333	93.3333	33.3333	0
O06825	46.6667	33.3333	46.6667	46.6667
O07177	40	53.3333	20	40
O07227	26.6667	60	40	26.6667
O07244	53.3333	46.6667	20	40
O07248	40	53.3333	33.3333	40
O07718	40	80	20	6.66667
O07802	26.6667	40	60	40
O08446	60	60	20	20
O33192	33.3333	53.3333	6.66667	33.3333
O33230	53.3333	73.3333	6.66667	20
O33285	33.3333	60	40	13.3333
O50393	46.6667	53.3333	33.3333	46.6667
O50394	40	60	40	33.3333
O50408	26.6667	60	26.6667	13.3333
O50410	40	46.6667	40	46.6667
O50411	46.6667	60	40	20
O50455	46.6667	13.3333	40	66.6667
O50462	53.3333	46.6667	33.3333	26.6667
O53193	53.3333	53.3333	33.3333	26.6667
O53370	33.3333	66.6667	46.6667	26.6667
O53388	46.6667	46.6667	26.6667	40
O53451	46.6667	33.3333	40	26.6667
O53501	20	60	46.6667	33.3333
O53508	46.6667	53.3333	13.3333	20
O53532	53.3333	40	20	40
O53582	33.3333	66.6667	53.3333	20
O53674	86.6667	66.6667	0	33.3333
O53676	53.3333	33.3333	26.6667	53.3333
O53692	46.6667	53.3333	33.3333	26.6667
O53695	40	73.3333	46.6667	13.3333
O53732	53.3333	40	13.3333	46.6667
O53779	33.3333	60	40	33.3333
O53789	93.3333	60	0	0
O53850	33.3333	53.3333	53.3333	33.3333
O53857	60	46.6667	20	33.3333
O53859	40	46.6667	46.6667	33.3333
O53871	60	46.6667	26.6667	40
O53900	46.6667	53.3333	26.6667	26.6667
O53937	53.3333	46.6667	26.6667	26.6667
O53943	26.6667	40	20	33.3333
O53945	66.6667	60	20	20
O53963	33.3333	40	46.6667	26.6667
O69622	66.6667	73.3333	13.3333	6.66667
O69623	33.3333	46.6667	53.3333	46.6667
O69671	60	46.6667	20	46.6667
O69689	53.3333	53.3333	26.6667	26.6667
O69690	46.6667	66.6667	40	20
O69704	46.6667	53.3333	13.3333	20
O69730	40	53.3333	33.3333	33.3333
O86311	46.6667	73.3333	26.6667	20
P0CH91	46.6667	33.3333	6.66667	40
P0CL61	33.3333	60	40	20
P0CL62	53.3333	60	33.3333	13.3333
P0DOA7	33.3333	53.3333	26.6667	13.3333
P63907	53.3333	60	20	26.6667
P71615	46.6667	60	20	26.6667
P71623	20	53.3333	46.6667	26.6667
P71635	40	40	33.3333	33.3333
P71725	66.6667	80	26.6667	13.3333
P71730	53.3333	66.6667	26.6667	26.6667
P71785	33.3333	40	33.3333	46.6667
P71790	53.3333	60	20	20
P71791	53.3333	53.3333	13.3333	26.6667
P71820	46.6667	60	26.6667	26.6667
P71847	40	40	33.3333	33.3333
P71889	53.3333	53.3333	20	33.3333
P71913	60	60	6.66667	13.3333
P95231	60	60	13.3333	26.6667
P95257	26.6667	73.3333	20	13.3333
P95272	46.6667	46.6667	33.3333	40
P95283	26.6667	66.6667	46.6667	26.6667
P96210	66.6667	53.3333	0	13.3333
P96374	40	46.6667	26.6667	33.3333
P96419	53.3333	66.6667	40	13.3333
P96825	46.6667	53.3333	33.3333	33.3333
P96843	33.3333	73.3333	33.3333	20
P96847	46.6667	66.6667	33.3333	33.3333
P96856	60	40	0	40
P96877	53.3333	60	20	20
P96878	46.6667	66.6667	13.3333	6.66667
P96886	60	46.6667	20	20
P9WF19	60	46.6667	13.3333	26.6667
P9WF31	53.3333	60	20	20
P9WF33	33.3333	66.6667	40	20
P9WF35	40	66.6667	40	20
P9WF45	33.3333	40	26.6667	26.6667
P9WF49	26.6667	60	40	33.3333
P9WF55	20	46.6667	53.3333	26.6667
P9WF59	20	53.3333	53.3333	40
P9WF61	40	40	33.3333	46.6667
P9WF63	20	60	53.3333	33.3333
P9WF67	33.3333	73.3333	53.3333	26.6667
P9WF69	13.3333	46.6667	60	33.3333
P9WF73	26.6667	73.3333	46.6667	26.6667
P9WF75	33.3333	53.3333	40	33.3333
P9WF77	33.3333	40	33.3333	26.6667
P9WF79	13.3333	26.6667	60	33.3333
P9WF81	33.3333	46.6667	40	20
P9WF83	46.6667	40	33.3333	40
P9WF85	26.6667	53.3333	46.6667	33.3333
P9WF91	46.6667	53.3333	26.6667	33.3333
P9WF93	26.6667	40	33.3333	33.3333
P9WFA5	33.3333	46.6667	46.6667	33.3333
P9WFB7	60	66.6667	20	20
P9WFC1	33.3333	60	40	40
P9WFC5	66.6667	66.6667	13.3333	13.3333
P9WFE1	60	33.3333	20	46.6667
P9WFE3	46.6667	46.6667	6.66667	40
P9WFE7	46.6667	40	33.3333	33.3333
P9WFE9	46.6667	53.3333	33.3333	26.6667
P9WFF3	40	66.6667	33.3333	20
P9WFF9	40	33.3333	40	33.3333
P9WFG7	53.3333	53.3333	26.6667	26.6667
P9WFG9	73.3333	53.3333	6.66667	40
P9WFJ5	26.6667	73.3333	53.3333	20
P9WFN3	40	73.3333	20	20
P9WFQ9	60	46.6667	26.6667	40
P9WFR1	66.6667	53.3333	6.66667	40
P9WFR3	60	66.6667	13.3333	20
P9WFR7	60	33.3333	20	46.6667
P9WFT1	40	73.3333	40	26.6667
P9WFT3	60	40	20	46.6667
P9WFT5	73.3333	60	6.66667	26.6667
P9WFT7	40	46.6667	33.3333	53.3333
P9WFT9	33.3333	60	33.3333	20
P9WFU1	46.6667	73.3333	46.6667	26.6667
P9WFU3	53.3333	53.3333	20	40
P9WFU9	60	40	13.3333	40
P9WFV1	73.3333	33.3333	6.66667	60
P9WFV9	46.6667	66.6667	26.6667	20
P9WFW1	46.6667	53.3333	13.3333	20
P9WFW3	60	80	20	13.3333
P9WFW7	33.3333	53.3333	33.3333	40
P9WFW9	53.3333	40	20	33.3333
P9WFX3	46.6667	73.3333	13.3333	13.3333
P9WFX7	46.6667	60	33.3333	20
P9WFX9	46.6667	40	13.3333	33.3333
P9WFY1	66.6667	60	26.6667	26.6667
P9WFY7	26.6667	60	46.6667	13.3333
P9WFY9	46.6667	53.3333	20	33.3333
P9WG01	40	66.6667	33.3333	26.6667
P9WG03	53.3333	86.6667	20	13.3333
P9WG05	40	66.6667	33.3333	20
P9WG11	60	53.3333	20	33.3333
P9WG21	46.6667	53.3333	20	33.3333
P9WG33	60	53.3333	13.3333	20
P9WG65	53.3333	60	33.3333	20
P9WG71	40	66.6667	13.3333	20
P9WG73	60	80	26.6667	20
P9WG79	40	46.6667	26.6667	33.3333
P9WG81	46.6667	46.6667	20	40
P9WG83	53.3333	46.6667	26.6667	26.6667
P9WG95	73.3333	60	20	40
P9WG97	60	46.6667	20	26.6667
P9WG99	20	60	53.3333	20
P9WGA1	40	86.6667	46.6667	0
P9WGB3	60	73.3333	26.6667	0
P9WGB5	53.3333	33.3333	13.3333	26.6667
P9WGB9	40	60	20	20
P9WGC7	26.6667	60	33.3333	33.3333
P9WGC9	53.3333	53.3333	13.3333	40
P9WGD5	26.6667	73.3333	26.6667	13.3333
P9WGE3	46.6667	46.6667	13.3333	26.6667
P9WGF1	20	26.6667	73.3333	53.3333
P9WGF3	46.6667	53.3333	40	20
P9WGF7	46.6667	46.6667	26.6667	33.3333
P9WGH3	60	66.6667	13.3333	20
P9WGJ3	53.3333	86.6667	13.3333	13.3333
P9WGN3	40	53.3333	40	33.3333
P9WGN7	53.3333	33.3333	13.3333	46.6667
P9WGN9	66.6667	73.3333	0	6.66667
P9WGP1	66.6667	80	20	6.66667
P9WGP9	60	60	26.6667	40
P9WGU3	40	73.3333	40	20
P9WGU5	73.3333	40	13.3333	33.3333
P9WGU7	46.6667	53.3333	40	33.3333
P9WGV5	53.3333	53.3333	33.3333	26.6667
P9WGV9	40	73.3333	33.3333	20
P9WGW1	46.6667	66.6667	20	20
P9WGW5	40	60	40	40
P9WGW9	73.3333	80	20	6.66667
P9WGY1	53.3333	46.6667	20	40
P9WGY3	33.3333	33.3333	33.3333	40
P9WGY5	66.6667	46.6667	20	26.6667
P9WGZ3	60	66.6667	13.3333	26.6667
P9WGZ5	40	46.6667	33.3333	26.6667
P9WGZ7	60	73.3333	13.3333	20
P9WH01	53.3333	66.6667	20	0
P9WH05	66.6667	73.3333	20	6.66667
P9WH07	33.3333	73.3333	46.6667	6.66667
P9WH29	66.6667	53.3333	13.3333	20
P9WH33	66.6667	60	0	26.6667
P9WH35	60	40	20	46.6667
P9WH37	46.6667	80	26.6667	6.66667
P9WH57	73.3333	66.6667	13.3333	20
P9WH61	46.6667	86.6667	26.6667	6.66667
P9WH63	60	93.3333	20	6.66667
P9WH67	53.3333	33.3333	26.6667	40
P9WH73	33.3333	20	33.3333	20
P9WH85	53.3333	53.3333	20	20
P9WHA5	66.6667	66.6667	13.3333	20
P9WHB5	53.3333	93.3333	20	6.66667
P9WHC1	60	86.6667	13.3333	0
P9WHC3	53.3333	46.6667	26.6667	33.3333
P9WHC7	73.3333	53.3333	13.3333	26.6667
P9WHD5	53.3333	60	20	33.3333
P9WHE1	53.3333	73.3333	13.3333	26.6667
P9WHE3	46.6667	66.6667	26.6667	20
P9WHE5	60	53.3333	33.3333	26.6667
P9WHF9	46.6667	60	33.3333	33.3333
P9WHH5	53.3333	40	33.3333	26.6667
P9WHI9	40	40	40	26.6667
P9WHJ9	60	60	20	13.3333
P9WHK9	66.6667	40	20	46.6667
P9WHL1	40	80	53.3333	13.3333
P9WHL3	60	60	33.3333	26.6667
P9WHL5	33.3333	40	33.3333	46.6667
P9WHL9	53.3333	80	20	13.3333
P9WHM3	60	20	0	46.6667
P9WHM7	53.3333	40	20	33.3333
P9WHM9	53.3333	66.6667	33.3333	26.6667
P9WHN3	53.3333	53.3333	33.3333	26.6667
P9WHN9	46.6667	60	13.3333	26.6667
P9WHP1	66.6667	46.6667	20	26.6667
P9WHP7	53.3333	53.3333	26.6667	20
P9WHP9	80	53.3333	6.66667	26.6667
P9WHQ5	66.6667	66.6667	13.3333	26.6667
P9WHR1	46.6667	53.3333	40	13.3333
P9WHS5	26.6667	66.6667	33.3333	20
P9WHS9	40	40	33.3333	40
P9WHT3	53.3333	40	26.6667	26.6667
P9WHT7	33.3333	60	26.6667	26.6667
P9WHU7	53.3333	80	33.3333	13.3333
P9WHU9	60	60	13.3333	26.6667
P9WHV1	53.3333	60	26.6667	20
P9WHV3	46.6667	73.3333	33.3333	13.3333
P9WHW1	53.3333	40	26.6667	33.3333
P9WI39	46.6667	40	26.6667	26.6667
P9WI43	60	73.3333	20	6.66667
P9WI51	60	66.6667	26.6667	26.6667
P9WI57	53.3333	53.3333	20	6.66667
P9WI99	60	40	20	33.3333
P9WIA7	13.3333	53.3333	66.6667	13.3333
P9WID1	46.6667	60	33.3333	33.3333
P9WID9	40	60	20	20
P9WIF1	40	46.6667	46.6667	26.6667
P9WIH1	60	66.6667	26.6667	26.6667
P9WII1	60	53.3333	20	26.6667
P9WIJ3	33.3333	53.3333	46.6667	26.6667
P9WIJ9	73.3333	40	13.3333	13.3333
P9WIL1	53.3333	53.3333	26.6667	33.3333
P9WIL9	33.3333	73.3333	40	13.3333
P9WIM1	40	60	40	26.6667
P9WIM5	46.6667	46.6667	40	33.3333
P9WIN3	60	46.6667	20	33.3333
P9WIN7	60	66.6667	20	20
P9WIN9	20	46.6667	60	33.3333
P9WIQ5	40	60	26.6667	40
P9WIQ7	66.6667	53.3333	6.66667	26.6667
P9WIR3	60	73.3333	20	26.6667
P9WIS3	66.6667	73.3333	13.3333	13.3333
P9WIT1	53.3333	40	20	33.3333
P9WIT5	13.3333	86.6667	66.6667	6.66667
P9WIT7	40	66.6667	20	20
P9WIU9	40	53.3333	13.3333	33.3333
P9WIV3	33.3333	73.3333	26.6667	6.66667
P9WIV5	60	66.6667	26.6667	0
P9WIV7	40	40	20	26.6667
P9WIW1	20	40	40	60
P9WIW5	20	73.3333	60	13.3333
P9WIW7	33.3333	40	53.3333	46.6667
P9WIW9	40	53.3333	46.6667	33.3333
P9WIX1	26.6667	66.6667	33.3333	13.3333
P9WIX3	20	53.3333	53.3333	20
P9WIX7	86.6667	73.3333	0	0
P9WIZ1	33.3333	60	33.3333	20
P9WIZ9	26.6667	46.6667	26.6667	26.6667
P9WJ79	60	66.6667	26.6667	20
P9WJC1	53.3333	46.6667	20	40
P9WJE5	53.3333	60	26.6667	13.3333
P9WJE9	46.6667	73.3333	26.6667	20
P9WJF3	60	86.6667	20	13.3333
P9WJF7	26.6667	66.6667	33.3333	33.3333
P9WJF9	33.3333	46.6667	26.6667	33.3333
P9WJG1	40	60	40	26.6667
P9WJG3	26.6667	60	40	26.6667
P9WJG5	26.6667	60	46.6667	20
P9WJG7	20	93.3333	66.6667	0
P9WJG9	53.3333	66.6667	13.3333	13.3333
P9WJH1	53.3333	53.3333	33.3333	33.3333
P9WJH3	73.3333	73.3333	0	13.3333
P9WJI1	33.3333	40	33.3333	46.6667
P9WJJ5	33.3333	66.6667	26.6667	13.3333
P9WJJ9	46.6667	33.3333	33.3333	46.6667
P9WJK1	13.3333	66.6667	33.3333	20
P9WJK5	46.6667	33.3333	26.6667	40
P9WJK7	53.3333	40	26.6667	40
P9WJK9	66.6667	60	6.66667	13.3333
P9WJL1	46.6667	46.6667	40	26.6667
P9WJL5	46.6667	60	33.3333	26.6667
P9WJL7	46.6667	73.3333	20	20
P9WJL9	60	40	26.6667	46.6667
P9WJM3	40	40	46.6667	53.3333
P9WJN7	46.6667	60	13.3333	20
P9WJP1	60	73.3333	20	6.66667
P9WJP3	40	46.6667	46.6667	46.6667
P9WJP5	40	60	33.3333	33.3333
P9WJQ7	80	46.6667	13.3333	33.3333
P9WJQ9	46.6667	66.6667	33.3333	13.3333
P9WJR1	40	40	33.3333	33.3333
P9WJR3	46.6667	66.6667	40	20
P9WJR5	26.6667	60	20	13.3333
P9WJR7	73.3333	60	13.3333	20
P9WJS1	46.6667	60	20	20
P9WJS5	53.3333	73.3333	26.6667	13.3333
P9WJS9	13.3333	40	66.6667	40
P9WJT9	40	60	40	33.3333
P9WJU1	33.3333	60	53.3333	20
P9WJV1	60	66.6667	20	26.6667
P9WJW1	66.6667	33.3333	20	40
P9WJW5	33.3333	53.3333	33.3333	26.6667
P9WJW9	46.6667	53.3333	26.6667	33.3333
P9WJX3	53.3333	60	20	20
P9WJX7	46.6667	53.3333	6.66667	20
P9WJX9	46.6667	66.6667	33.3333	20
P9WJY9	46.6667	66.6667	20	20
P9WK05	60	73.3333	20	26.6667
P9WK07	46.6667	60	20	20
P9WK11	40	66.6667	26.6667	26.6667
P9WK13	66.6667	53.3333	20	33.3333
P9WK25	66.6667	33.3333	20	40
P9WK27	60	73.3333	26.6667	13.3333
P9WK35	53.3333	53.3333	26.6667	33.3333
P9WK37	33.3333	60	46.6667	33.3333
P9WK55	53.3333	46.6667	26.6667	20
P9WK73	46.6667	66.6667	40	20
P9WK85	46.6667	66.6667	33.3333	20
P9WK93	60	80	26.6667	20
P9WK95	46.6667	66.6667	26.6667	26.6667
P9WK97	66.6667	66.6667	6.66667	13.3333
P9WK99	53.3333	60	6.66667	6.66667
P9WKA1	66.6667	66.6667	0	26.6667
P9WKA3	66.6667	80	20	13.3333
P9WKB3	73.3333	73.3333	13.3333	13.3333
P9WKB7	46.6667	53.3333	40	33.3333
P9WKC1	60	73.3333	26.6667	20
P9WKE7	53.3333	60	33.3333	33.3333
P9WKF3	46.6667	60	40	33.3333
P9WKF9	60	60	33.3333	26.6667
P9WKG3	53.3333	60	20	20
P9WKK1	66.6667	60	20	33.3333
P9WKK5	60	53.3333	26.6667	20
P9WKV1	60	60	13.3333	20
P9WKW5	53.3333	93.3333	13.3333	0
P9WKX7	40	80	26.6667	13.3333
P9WL37	53.3333	73.3333	33.3333	13.3333
P9WLG1	73.3333	73.3333	20	13.3333
P9WLJ1	60	73.3333	6.66667	20
P9WLM7	33.3333	53.3333	33.3333	20
P9WLN1	53.3333	53.3333	26.6667	40
P9WLP1	40	60	33.3333	33.3333
P9WLP7	46.6667	40	33.3333	46.6667
P9WLT1	66.6667	53.3333	26.6667	33.3333
P9WLU3	20	46.6667	33.3333	20
P9WM65	26.6667	53.3333	53.3333	40
P9WMA9	66.6667	46.6667	26.6667	26.6667
P9WMB9	60	46.6667	20	46.6667
P9WMC3	53.3333	46.6667	0	33.3333
P9WMC9	60	40	20	40
P9WME7	66.6667	40	13.3333	33.3333
P9WMF1	46.6667	53.3333	26.6667	26.6667
P9WMG5	60	53.3333	26.6667	26.6667
P9WMH5	46.6667	53.3333	26.6667	26.6667
P9WMI5	46.6667	40	13.3333	33.3333
P9WMJ7	60	60	20	33.3333
P9WML7	33.3333	53.3333	26.6667	26.6667
P9WML9	60	66.6667	6.66667	20
P9WMM1	40	53.3333	33.3333	33.3333
P9WMM3	53.3333	66.6667	26.6667	26.6667
P9WMM7	53.3333	33.3333	20	33.3333
P9WMM9	46.6667	40	33.3333	40
P9WMN9	73.3333	93.3333	6.66667	6.66667
P9WMP1	53.3333	53.3333	33.3333	33.3333
P9WMP3	46.6667	46.6667	26.6667	40
P9WMP5	73.3333	26.6667	13.3333	53.3333
P9WMP7	46.6667	80	40	0
P9WMQ7	46.6667	46.6667	26.6667	26.6667
P9WMQ9	20	40	46.6667	40
P9WMR1	46.6667	53.3333	26.6667	33.3333
P9WMR5	53.3333	73.3333	33.3333	13.3333
P9WMR9	53.3333	66.6667	33.3333	33.3333
P9WMS3	33.3333	60	33.3333	20
P9WMT5	60	86.6667	0	0
P9WMT9	26.6667	46.6667	20	33.3333
P9WMU3	33.3333	53.3333	40	13.3333
P9WMU5	40	60	33.3333	20
P9WMV3	40	66.6667	40	26.6667
P9WMW1	53.3333	46.6667	26.6667	33.3333
P9WMW7	40	53.3333	46.6667	46.6667
P9WMY5	46.6667	66.6667	46.6667	13.3333
P9WMY9	33.3333	60	53.3333	26.6667
P9WMZ7	46.6667	66.6667	26.6667	20
P9WMZ9	73.3333	66.6667	20	13.3333
P9WN01	46.6667	66.6667	33.3333	20
P9WN09	53.3333	53.3333	33.3333	26.6667
P9WN15	40	53.3333	33.3333	33.3333
P9WN19	46.6667	73.3333	26.6667	20
P9WN31	26.6667	46.6667	40	26.6667
P9WN33	60	60	33.3333	40
P9WN35	13.3333	73.3333	53.3333	0
P9WN41	46.6667	60	26.6667	20
P9WN47	46.6667	53.3333	20	26.6667
P9WN51	46.6667	46.6667	26.6667	46.6667
P9WN53	33.3333	46.6667	20	40
P9WN57	66.6667	60	20	26.6667
P9WN59	53.3333	53.3333	26.6667	33.3333
P9WN61	73.3333	66.6667	13.3333	33.3333
P9WN63	46.6667	73.3333	33.3333	20
P9WN67	53.3333	40	26.6667	26.6667
P9WN71	40	60	40	20
P9WN73	66.6667	66.6667	13.3333	20
P9WN75	60	53.3333	26.6667	33.3333
P9WN77	60	53.3333	20	26.6667
P9WN81	60	60	13.3333	33.3333
P9WN89	46.6667	53.3333	26.6667	33.3333
P9WN91	46.6667	53.3333	26.6667	33.3333
P9WNA1	46.6667	46.6667	13.3333	26.6667
P9WNA3	66.6667	66.6667	6.66667	20
P9WNA9	66.6667	86.6667	26.6667	6.66667
P9WNC7	40	60	33.3333	20
P9WNC9	80	60	0	26.6667
P9WND5	53.3333	53.3333	26.6667	26.6667
P9WND7	60	46.6667	26.6667	33.3333
P9WNE7	26.6667	46.6667	40	40
P9WNF5	53.3333	33.3333	20	33.3333
P9WNG9	46.6667	73.3333	40	20
P9WNI7	33.3333	53.3333	26.6667	13.3333
P9WNJ5	33.3333	53.3333	26.6667	13.3333
P9WNJ7	40	73.3333	6.66667	20
P9WNK9	40	60	40	26.6667
P9WNL3	33.3333	73.3333	26.6667	20
P9WNM7	40	66.6667	26.6667	20
P9WNP9	53.3333	33.3333	20	53.3333
P9WNQ3	40	26.6667	40	60
P9WNQ9	80	40	13.3333	26.6667
P9WNR3	26.6667	80	6.66667	13.3333
P9WNS7	73.3333	66.6667	20	13.3333
P9WNS9	53.3333	33.3333	40	40
P9WNT1	33.3333	46.6667	33.3333	46.6667
P9WNT7	53.3333	53.3333	20	33.3333
P9WNU5	66.6667	60	6.66667	26.6667
P9WNX7	53.3333	46.6667	26.6667	40
P9WNX9	46.6667	33.3333	20	46.6667
P9WP01	66.6667	46.6667	6.66667	33.3333
P9WP03	53.3333	53.3333	26.6667	33.3333
P9WP11	60	53.3333	26.6667	40
P9WP13	40	53.3333	40	33.3333
P9WP29	60	66.6667	20	26.6667
P9WP35	66.6667	53.3333	13.3333	40
P9WP39	53.3333	73.3333	20	6.66667
P9WP57	53.3333	20	20	46.6667
P9WP59	46.6667	53.3333	33.3333	20
P9WP61	33.3333	53.3333	40	46.6667
P9WP63	46.6667	40	26.6667	46.6667
P9WP71	66.6667	46.6667	20	13.3333
P9WP73	60	46.6667	33.3333	40
P9WP81	53.3333	53.3333	33.3333	33.3333
P9WP83	40	66.6667	26.6667	20
P9WP91	40	46.6667	33.3333	33.3333
P9WP97	73.3333	53.3333	20	26.6667
P9WP99	26.6667	53.3333	26.6667	20
P9WPA1	20	66.6667	40	20
P9WPA7	60	46.6667	26.6667	26.6667
P9WPD1	40	40	13.3333	40
P9WPD5	40	33.3333	13.3333	33.3333
P9WPE1	53.3333	66.6667	33.3333	6.66667
P9WPG3	66.6667	66.6667	20	20
P9WPG5	33.3333	86.6667	33.3333	0
P9WPI1	66.6667	73.3333	0	20
P9WPJ3	53.3333	53.3333	26.6667	46.6667
P9WPJ5	40	53.3333	46.6667	26.6667
P9WPK1	60	40	20	40
P9WPK7	46.6667	60	13.3333	13.3333
P9WPL1	66.6667	53.3333	20	46.6667
P9WPL3	46.6667	60	20	33.3333
P9WPN7	66.6667	53.3333	6.66667	33.3333
P9WPR5	60	46.6667	13.3333	20
P9WPS1	53.3333	33.3333	26.6667	46.6667
P9WPS5	40	53.3333	33.3333	20
P9WPS7	26.6667	66.6667	40	13.3333
P9WPS9	53.3333	53.3333	13.3333	26.6667
P9WPT1	60	53.3333	6.66667	40
P9WPT3	46.6667	66.6667	26.6667	20
P9WPT7	66.6667	60	20	13.3333
P9WPT9	53.3333	46.6667	26.6667	40
P9WPU3	60	33.3333	6.66667	60
P9WPU5	60	60	0	26.6667
P9WPU9	66.6667	66.6667	20	26.6667
P9WPV1	33.3333	73.3333	40	20
P9WPV3	33.3333	66.6667	53.3333	20
P9WPV5	66.6667	53.3333	26.6667	26.6667
P9WPW7	46.6667	60	33.3333	26.6667
P9WPW9	46.6667	53.3333	33.3333	33.3333
P9WPX1	53.3333	53.3333	33.3333	40
P9WPZ1	33.3333	46.6667	6.66667	33.3333
P9WPZ9	53.3333	53.3333	20	33.3333
P9WQ05	60	66.6667	26.6667	20
P9WQ07	46.6667	60	33.3333	33.3333
P9WQ13	46.6667	60	26.6667	20
P9WQ21	46.6667	26.6667	33.3333	53.3333
P9WQ27	40	60	33.3333	26.6667
P9WQ39	53.3333	66.6667	26.6667	20
P9WQ49	60	46.6667	26.6667	40
P9WQ57	40	60	20	26.6667
P9WQ67	46.6667	53.3333	33.3333	33.3333
P9WQ79	60	33.3333	26.6667	53.3333
P9WQ83	46.6667	66.6667	33.3333	26.6667
P9WQ85	40	60	33.3333	26.6667
P9WQ91	13.3333	53.3333	26.6667	40
P9WQC5	60	40	13.3333	46.6667
P9WQC7	46.6667	40	33.3333	26.6667
P9WQF5	60	53.3333	20	20
P9WQF7	66.6667	66.6667	13.3333	26.6667
P9WQF9	40	60	26.6667	20
P9WQG3	53.3333	46.6667	20	40
P9WQG7	33.3333	60	33.3333	33.3333
P9WQH1	46.6667	60	33.3333	33.3333
P9WQH9	33.3333	60	26.6667	26.6667
P9WQJ3	86.6667	53.3333	0	33.3333
P9WQK1	40	46.6667	33.3333	26.6667
P9WQK5	33.3333	46.6667	46.6667	26.6667
P9WQL3	53.3333	66.6667	33.3333	13.3333
P9WQL5	46.6667	46.6667	20	26.6667
P9WQM7	40	40	20	26.6667
P9WQN7	60	60	33.3333	26.6667
Q50703	33.3333	66.6667	40	26.6667
Q6MWV0	46.6667	40	33.3333	26.6667
Q6MX39	53.3333	46.6667	33.3333	33.3333
Q6MX43	33.3333	66.6667	40	26.6667
Q6MX50	60	60	26.6667	6.66667
Q79FA4	53.3333	60	26.6667	20
Q79FB3	53.3333	60	33.3333	26.6667
Q79FI9	40	60	33.3333	33.3333
Q79FJ2	73.3333	40	20	33.3333
Q79FL8	40	53.3333	40	33.3333
Q79FN7	73.3333	80	13.3333	13.3333
Q79FS8	53.3333	73.3333	20	13.3333
Q79FU0	46.6667	60	33.3333	33.3333
Q79FU2	46.6667	26.6667	33.3333	46.6667
Q79FU3	53.3333	33.3333	33.3333	33.3333
Q79G13	60	46.6667	13.3333	33.3333
E2FZM4	73.3333	46.6667	0	20
I6WX95	46.6667	73.3333	26.6667	13.3333
I6X4W0	53.3333	60	20	20
I6X4W4	46.6667	53.3333	20	33.3333
I6X5I7	46.6667	53.3333	33.3333	33.3333
I6XHX8	66.6667	40	6.66667	26.6667
I6XWA1	53.3333	60	26.6667	26.6667
I6XWG2	46.6667	53.3333	26.6667	26.6667
I6Y0L1	40	53.3333	33.3333	26.6667
I6Y0W5	33.3333	46.6667	20	40
I6Y120	73.3333	60	20	20
I6Y1Q2	66.6667	53.3333	13.3333	40
I6Y276	60	53.3333	26.6667	26.6667
I6Y3I6	26.6667	60	20	20
I6Y3P1	40	73.3333	40	13.3333
I6Y3U6	46.6667	60	26.6667	20
I6Y4E8	46.6667	73.3333	26.6667	6.66667
I6Y551	33.3333	66.6667	40	20
I6Y8K5	66.6667	86.6667	26.6667	6.66667
I6Y8R4	60	46.6667	20	40
I6Y9F7	60	86.6667	20	13.3333
I6YA00	53.3333	40	20	53.3333
I6YA03	33.3333	80	40	6.66667
I6YB06	33.3333	66.6667	40	20
I6YBX3	40	60	33.3333	33.3333
I6YCN3	40	40	13.3333	33.3333
I6YDI9	80	100	0	0
I6YEA3	60	73.3333	13.3333	20
I6YET7	40	26.6667	26.6667	6.66667
I6YEZ8	53.3333	60	26.6667	20
I6YFL7	33.3333	66.6667	46.6667	20
I6YG46	66.6667	53.3333	13.3333	20
I6YGX2	53.3333	66.6667	33.3333	26.6667
L0T2W6	33.3333	53.3333	53.3333	13.3333
L0T4W6	60	46.6667	33.3333	33.3333
L0T550	73.3333	53.3333	13.3333	46.6667
L0T5V6	33.3333	46.6667	46.6667	33.3333
L0TAD5	46.6667	40	20	46.6667
L0TBR2	80	46.6667	13.3333	33.3333
L7N650	53.3333	60	33.3333	33.3333
L7N655	53.3333	60	20	20
L7N662	26.6667	60	40	26.6667
L7N664	33.3333	80	20	0
L7N669	40	66.6667	20	20
L7N690	66.6667	80	20	13.3333
L7N6B4	40	60	46.6667	26.6667
O05318	60	46.6667	13.3333	33.3333
O05443	20	53.3333	40	33.3333
O05450	46.6667	60	26.6667	40
O05575	60	60	20	33.3333
O05576	46.6667	46.6667	33.3333	40
O05578	53.3333	60	40	26.6667
O05769	13.3333	66.6667	73.3333	26.6667
O05784	46.6667	46.6667	33.3333	40
O05819	60	53.3333	20	33.3333
O05841	46.6667	60	33.3333	33.3333
O05855	40	66.6667	20	6.66667
O05858	66.6667	53.3333	13.3333	33.3333
O05872	46.6667	66.6667	26.6667	33.3333
O05883	40	46.6667	46.6667	26.6667
O05884	40	53.3333	26.6667	20
O05886	60	40	26.6667	46.6667
O05894	33.3333	53.3333	46.6667	33.3333
O05895	73.3333	80	6.66667	20
O05897	40	80	26.6667	6.66667
O05898	53.3333	60	33.3333	26.6667
O06137	60	46.6667	20	0
O06138	60	53.3333	33.3333	26.6667
O06139	33.3333	80	60	13.3333
O06155	66.6667	53.3333	6.66667	40
O06169	80	53.3333	0	26.6667
O06179	53.3333	46.6667	33.3333	40
O06302	53.3333	53.3333	20	40
O06311	80	53.3333	0	26.6667
O06312	46.6667	20	20	53.3333
O06342	53.3333	60	40	26.6667
O06347	73.3333	53.3333	6.66667	26.6667
O06363	53.3333	46.6667	33.3333	33.3333
O06367	53.3333	60	33.3333	20
O06391	46.6667	46.6667	26.6667	40
O06546	33.3333	60	40	13.3333
O06562	33.3333	73.3333	46.6667	20
O06574	46.6667	73.3333	26.6667	6.66667
O06793	53.3333	66.6667	26.6667	26.6667
O06797	66.6667	46.6667	20	26.6667
O06817	33.3333	73.3333	33.3333	20
O07175	53.3333	60	33.3333	13.3333
O07179	33.3333	40	26.6667	20
O07226	60	53.3333	13.3333	40
O07239	26.6667	80	40	13.3333
O07257	40	73.3333	26.6667	20
O07414	33.3333	53.3333	46.6667	26.6667
O07416	33.3333	86.6667	40	13.3333
O07422	66.6667	26.6667	6.66667	26.6667
O07717	46.6667	53.3333	33.3333	26.6667
O07720	26.6667	73.3333	33.3333	13.3333
O07728	66.6667	60	13.3333	20
O07737	46.6667	53.3333	33.3333	20
O07750	20	26.6667	46.6667	40
O07779	53.3333	40	33.3333	40
O07806	66.6667	53.3333	26.6667	26.6667
O08343	33.3333	60	20	20
O33187	80	46.6667	0	33.3333
O33188	6.66667	53.3333	73.3333	33.3333
O33198	60	26.6667	13.3333	53.3333
O33203	46.6667	53.3333	6.66667	6.66667
O33206	53.3333	53.3333	40	20
O33298	80	66.6667	0	33.3333
O33317	60	60	20	33.3333
O33329	46.6667	46.6667	26.6667	26.6667
O33332	46.6667	66.6667	33.3333	26.6667
O33333	53.3333	80	33.3333	13.3333
O33340	40	40	26.6667	33.3333
O33341	60	93.3333	13.3333	6.66667
O33346	40	46.6667	26.6667	33.3333
O33364	53.3333	60	20	33.3333
O50402	60	60	0	40
O50419	33.3333	53.3333	40	46.6667
O50430	53.3333	40	33.3333	46.6667
O50433	33.3333	66.6667	33.3333	13.3333
O50434	60	53.3333	20	26.6667
O50435	53.3333	33.3333	13.3333	26.6667
O50443	46.6667	26.6667	26.6667	33.3333
O50444	46.6667	73.3333	26.6667	13.3333
O50456	13.3333	60	40	20
O50459	26.6667	66.6667	60	26.6667
O53146	46.6667	46.6667	26.6667	40
O53150	46.6667	60	26.6667	6.66667
O53164	46.6667	40	26.6667	40
O53176	40	60	33.3333	26.6667
O53198	66.6667	40	0	33.3333
O53213	66.6667	100	13.3333	0
O53219	26.6667	53.3333	46.6667	33.3333
O53281	46.6667	73.3333	40	20
O53291	53.3333	33.3333	33.3333	40
O53328	53.3333	53.3333	33.3333	40
O53332	40	66.6667	53.3333	13.3333
O53333	40	46.6667	20	33.3333
O53335	53.3333	73.3333	20	13.3333
O53337	66.6667	40	26.6667	33.3333
O53340	26.6667	53.3333	46.6667	13.3333
O53347	66.6667	40	13.3333	26.6667
O53348	60	73.3333	26.6667	20
O53371	46.6667	53.3333	26.6667	26.6667
O53379	80	33.3333	13.3333	40
O53382	33.3333	26.6667	40	40
O53390	46.6667	73.3333	0	20
O53405	60	66.6667	13.3333	33.3333
O53419	46.6667	33.3333	20	40
O53422	60	60	26.6667	26.6667
O53444	46.6667	60	20	6.66667
O53459	46.6667	26.6667	40	46.6667
O53467	33.3333	26.6667	20	40
O53533	66.6667	40	20	33.3333
O53620	40	53.3333	33.3333	33.3333
O53633	66.6667	46.6667	26.6667	46.6667
O53639	40	53.3333	20	13.3333
O53669	53.3333	46.6667	20	46.6667
O53673	33.3333	73.3333	40	13.3333
O53720	40	66.6667	40	20
O53778	40	60	26.6667	33.3333
O53811	46.6667	53.3333	26.6667	33.3333
O53816	40	53.3333	20	26.6667
O53830	33.3333	60	46.6667	20
O53872	33.3333	60	20	33.3333
O65933	26.6667	46.6667	26.6667	33.3333
O69668	73.3333	73.3333	6.66667	13.3333
O69670	46.6667	60	40	20
O69687	40	60	33.3333	26.6667
O69695	40	60	20	26.6667
O69719	40	66.6667	26.6667	33.3333
O69722	40	66.6667	40	20
O69723	33.3333	80	26.6667	13.3333
O69724	33.3333	80	40	6.66667
O69725	60	46.6667	20	26.6667
O69726	66.6667	73.3333	6.66667	13.3333
O69732	26.6667	33.3333	13.3333	26.6667
O86313	66.6667	86.6667	20	6.66667
O86318	46.6667	46.6667	20	26.6667
O86327	53.3333	60	13.3333	26.6667
O86332	53.3333	53.3333	26.6667	33.3333
O86335	40	46.6667	26.6667	33.3333
O86361	66.6667	66.6667	6.66667	33.3333
O86365	66.6667	40	26.6667	53.3333
O86374	53.3333	86.6667	33.3333	6.66667
P0CG95	60	53.3333	26.6667	26.6667
P0CL60	60	33.3333	26.6667	33.3333
P0CV93	26.6667	46.6667	33.3333	26.6667
P0CW33	40	53.3333	26.6667	33.3333
P0DOA6	33.3333	53.3333	26.6667	13.3333
P0DV54	53.3333	46.6667	33.3333	33.3333
P60230	33.3333	53.3333	26.6667	6.66667
P71622	40	26.6667	33.3333	33.3333
P71728	66.6667	53.3333	20	33.3333
P71745	66.6667	80	20	13.3333
P71750	46.6667	66.6667	40	6.66667
P71799	46.6667	53.3333	13.3333	46.6667
P71815	53.3333	46.6667	33.3333	33.3333
P71830	66.6667	40	13.3333	46.6667
P71838	40	80	20	13.3333
P71906	46.6667	66.6667	20	20
P71914	66.6667	66.6667	13.3333	33.3333
P71968	60	26.6667	13.3333	40
P71977	66.6667	46.6667	13.3333	26.6667
P72045	20	60	66.6667	20
P94982	46.6667	53.3333	26.6667	6.66667
P94996	53.3333	53.3333	20	33.3333
P95006	46.6667	53.3333	33.3333	33.3333
P95007	33.3333	46.6667	33.3333	33.3333
P95017	40	66.6667	26.6667	0
P95024	53.3333	66.6667	13.3333	26.6667
P95029	46.6667	60	13.3333	26.6667
P95034	40	66.6667	20	20
P95072	46.6667	53.3333	46.6667	40
P95073	40	60	20	20
P95149	40	46.6667	20	33.3333
P95164	40	40	46.6667	53.3333
P95172	33.3333	86.6667	33.3333	13.3333
P95186	46.6667	60	40	40
P95187	60	46.6667	0	46.6667
P95197	46.6667	66.6667	20	20
P95224	46.6667	40	26.6667	40
P95225	73.3333	46.6667	6.66667	40
P95279	53.3333	80	26.6667	20
P95280	60	60	20	40
P96217	46.6667	73.3333	26.6667	13.3333
P96229	40	60	46.6667	33.3333
P96271	53.3333	80	20	6.66667
P96273	60	46.6667	6.66667	26.6667
P96274	40	40	40	40
P96281	46.6667	60	13.3333	26.6667
P96284	60	80	13.3333	13.3333
P96394	40	66.6667	20	33.3333
P96404	60	66.6667	13.3333	20
P96819	33.3333	66.6667	46.6667	26.6667
P96824	60	60	13.3333	33.3333
P96831	46.6667	66.6667	20	20
P96832	46.6667	53.3333	20	26.6667
P96833	26.6667	73.3333	53.3333	13.3333
P96834	13.3333	66.6667	66.6667	26.6667
P96868	60	60	20	20
P96873	33.3333	46.6667	20	33.3333
P96937	33.3333	53.3333	13.3333	40
P9WF13	33.3333	60	20	26.6667
P9WF15	40	73.3333	20	13.3333
P9WF17	46.6667	60	20	20
P9WF23	53.3333	46.6667	33.3333	20
P9WF29	33.3333	60	13.3333	20
P9WF47	20	60	33.3333	33.3333
P9WF51	33.3333	66.6667	53.3333	20
P9WF53	20	46.6667	53.3333	26.6667
P9WF57	40	33.3333	40	20
P9WF65	40	46.6667	40	46.6667
P9WF71	26.6667	40	33.3333	40
P9WF87	26.6667	40	40	33.3333
P9WF89	20	46.6667	46.6667	26.6667
P9WF95	26.6667	66.6667	40	33.3333
P9WF99	20	46.6667	46.6667	46.6667
P9WFA1	26.6667	53.3333	46.6667	33.3333
P9WFA3	33.3333	53.3333	40	26.6667
P9WFA7	26.6667	73.3333	46.6667	20
P9WFA9	40	53.3333	40	26.6667
P9WFB1	40	46.6667	33.3333	33.3333
P9WFB3	26.6667	46.6667	46.6667	33.3333
P9WFB5	46.6667	40	13.3333	33.3333
P9WFC3	40	40	33.3333	26.6667
P9WFC9	40	33.3333	26.6667	40
P9WFD1	46.6667	46.6667	33.3333	46.6667
P9WFD3	53.3333	46.6667	26.6667	40
P9WFD5	53.3333	46.6667	20	46.6667
P9WFD9	46.6667	46.6667	26.6667	46.6667
P9WFE5	33.3333	53.3333	40	33.3333
P9WFG1	53.3333	66.6667	20	20
P9WFG3	73.3333	73.3333	6.66667	20
P9WFH1	60	46.6667	13.3333	40
P9WFH3	33.3333	40	20	40
P9WFH5	40	60	20	26.6667
P9WFH7	40	46.6667	13.3333	33.3333
P9WFH9	26.6667	60	20	13.3333
P9WFI1	33.3333	66.6667	20	20
P9WFI3	40	40	26.6667	26.6667
P9WFI5	53.3333	53.3333	13.3333	26.6667
P9WFI7	33.3333	66.6667	26.6667	6.66667
P9WFI9	40	53.3333	20	26.6667
P9WFJ1	60	53.3333	13.3333	26.6667
P9WFJ3	26.6667	46.6667	20	26.6667
P9WFJ7	40	46.6667	33.3333	40
P9WFJ9	40	60	33.3333	26.6667
P9WFK1	40	80	33.3333	6.66667
P9WFK3	46.6667	53.3333	26.6667	20
P9WFL3	66.6667	46.6667	6.66667	26.6667
P9WFL5	73.3333	66.6667	13.3333	13.3333
P9WFL7	60	40	20	46.6667
P9WFL9	53.3333	66.6667	33.3333	20
P9WFM1	33.3333	40	40	13.3333
P9WFM7	40	40	40	33.3333
P9WFN1	53.3333	53.3333	20	33.3333
P9WFP1	33.3333	66.6667	53.3333	0
P9WFP3	20	73.3333	40	6.66667
P9WFP7	66.6667	53.3333	13.3333	33.3333
P9WFQ3	60	60	6.66667	26.6667
P9WFS1	33.3333	46.6667	26.6667	40
P9WFS7	86.6667	53.3333	6.66667	20
P9WFV5	60	53.3333	20	33.3333
P9WFW5	53.3333	53.3333	20	26.6667
P9WFY3	46.6667	53.3333	20	20
P9WFY5	80	73.3333	6.66667	6.66667
P9WFZ3	66.6667	60	26.6667	26.6667
P9WFZ7	26.6667	46.6667	53.3333	40
P9WFZ9	46.6667	66.6667	33.3333	20
P9WG07	73.3333	60	20	33.3333
P9WG09	80	40	6.66667	46.6667
P9WG13	40	46.6667	33.3333	26.6667
P9WG15	53.3333	60	33.3333	33.3333
P9WG17	53.3333	60	26.6667	26.6667
P9WG19	33.3333	40	46.6667	46.6667
P9WG53	73.3333	60	13.3333	33.3333
P9WG61	73.3333	53.3333	6.66667	33.3333
P9WG63	80	53.3333	13.3333	40
P9WG85	60	53.3333	6.66667	20
P9WG87	60	66.6667	20	13.3333
P9WG89	53.3333	80	20	13.3333
P9WG91	33.3333	46.6667	33.3333	33.3333
P9WGA3	33.3333	66.6667	33.3333	26.6667
P9WGA7	46.6667	60	46.6667	20
P9WGA9	33.3333	53.3333	40	33.3333
P9WGB1	46.6667	53.3333	33.3333	33.3333
P9WGD1	80	73.3333	6.66667	13.3333
P9WGD3	73.3333	66.6667	13.3333	20
P9WGF5	40	66.6667	13.3333	13.3333
P9WGG7-2	53.3333	46.6667	6.66667	26.6667
P9WGG7-3	46.6667	46.6667	13.3333	26.6667
P9WGJ1	66.6667	53.3333	6.66667	40
P9WGJ5	46.6667	66.6667	26.6667	26.6667
P9WGJ7	60	73.3333	26.6667	26.6667
P9WGL7	40	46.6667	33.3333	40
P9WGN5	26.6667	33.3333	53.3333	66.6667
P9WGP7	53.3333	53.3333	33.3333	20
P9WGQ1	33.3333	46.6667	26.6667	26.6667
P9WGQ3	53.3333	33.3333	26.6667	40
P9WGQ5	20	33.3333	46.6667	40
P9WGQ7	53.3333	60	20	26.6667
P9WGQ9	53.3333	46.6667	26.6667	33.3333
P9WGR3	46.6667	53.3333	26.6667	40
P9WGR5	40	73.3333	26.6667	6.66667
P9WGR7	40	46.6667	33.3333	40
P9WGR9	46.6667	26.6667	26.6667	40
P9WGS1	33.3333	53.3333	33.3333	26.6667
P9WGS3	53.3333	53.3333	13.3333	40
P9WGS5	46.6667	40	33.3333	33.3333
P9WGS7	60	53.3333	26.6667	33.3333
P9WGT5	26.6667	40	46.6667	46.6667
P9WGV7	66.6667	73.3333	6.66667	6.66667
P9WGW7	60	80	26.6667	13.3333
P9WGX1	20	46.6667	40	26.6667
P9WGX3	73.3333	46.6667	6.66667	20
P9WGX9	53.3333	46.6667	26.6667	33.3333
P9WH17	46.6667	80	33.3333	6.66667
P9WH19	40	40	40	40
P9WH21	40	66.6667	33.3333	20
P9WH25	66.6667	80	0	20
P9WH27	26.6667	60	26.6667	40
P9WH31	26.6667	40	40	20
P9WH39	33.3333	60	26.6667	0
P9WH41	60	66.6667	6.66667	20
P9WH45	53.3333	60	26.6667	13.3333
P9WH47	86.6667	73.3333	0	20
P9WH49	86.6667	53.3333	6.66667	33.3333
P9WH51	80	60	6.66667	33.3333
P9WH53	46.6667	73.3333	33.3333	13.3333
P9WH55	60	60	26.6667	40
P9WH59	73.3333	53.3333	13.3333	26.6667
P9WH65	86.6667	73.3333	0	13.3333
P9WH79	26.6667	46.6667	40	40
P9WH81	66.6667	73.3333	26.6667	20
P9WH83	60	60	20	33.3333
P9WH87	53.3333	66.6667	20	26.6667
P9WH89	46.6667	53.3333	33.3333	26.6667
P9WH91	73.3333	40	6.66667	26.6667
P9WH93	60	73.3333	6.66667	20
P9WH95	46.6667	53.3333	26.6667	20
P9WH97	46.6667	46.6667	26.6667	33.3333
P9WH99	73.3333	46.6667	6.66667	40
P9WHA1	40	73.3333	26.6667	13.3333
P9WHA3	53.3333	60	26.6667	20
P9WHA7	53.3333	73.3333	26.6667	13.3333
P9WHA9	60	66.6667	20	33.3333
P9WHB1	53.3333	66.6667	26.6667	26.6667
P9WHB3	73.3333	60	0	20
P9WHB7	40	60	33.3333	20
P9WHB9	40	66.6667	33.3333	26.6667
P9WHC5	66.6667	73.3333	13.3333	13.3333
P9WHC9	33.3333	80	26.6667	20
P9WHD1	66.6667	60	20	26.6667
P9WHD3	80	86.6667	6.66667	0
P9WHD7	53.3333	73.3333	20	13.3333
P9WHD9	53.3333	53.3333	20	40
P9WHE7	60	80	13.3333	13.3333
P9WHF5	60	66.6667	26.6667	13.3333
P9WHF7	60	53.3333	20	46.6667
P9WHG1	40	46.6667	20	26.6667
P9WHG3	33.3333	73.3333	33.3333	13.3333
P9WHG5	33.3333	60	26.6667	20
P9WHG7	60	26.6667	26.6667	40
P9WHI1	66.6667	66.6667	13.3333	33.3333
P9WHI3	46.6667	60	33.3333	33.3333
P9WHI5	46.6667	73.3333	33.3333	20
P9WHI7	46.6667	46.6667	40	20
P9WHJ7	73.3333	46.6667	13.3333	13.3333
P9WHK1	53.3333	40	20	40
P9WHK3	80	53.3333	6.66667	26.6667
P9WHM1	60	60	20	20
P9WHN1	60	53.3333	20	33.3333
P9WHN7	53.3333	60	33.3333	20
P9WHP3	46.6667	60	26.6667	13.3333
P9WHQ1	80	53.3333	6.66667	40
P9WHQ3	53.3333	60	13.3333	26.6667
P9WHR5	60	46.6667	26.6667	33.3333
P9WHS7	60	33.3333	26.6667	46.6667
P9WHT1	46.6667	73.3333	26.6667	26.6667
P9WHT5	80	73.3333	6.66667	20
P9WHU3	40	53.3333	40	26.6667
P9WHX1	46.6667	73.3333	20	26.6667
P9WHX3	46.6667	66.6667	33.3333	26.6667
P9WHX5	46.6667	46.6667	26.6667	33.3333
P9WHX7	40	66.6667	33.3333	13.3333
P9WHY7	53.3333	46.6667	26.6667	40
P9WHY9	53.3333	46.6667	26.6667	40
P9WHZ1	46.6667	60	26.6667	33.3333
P9WHZ5	46.6667	60	33.3333	40
P9WI01	46.6667	53.3333	26.6667	26.6667
P9WI03	53.3333	53.3333	20	20
P9WI05	53.3333	33.3333	26.6667	33.3333
P9WI09	46.6667	33.3333	26.6667	33.3333
P9WI13	53.3333	66.6667	20	26.6667
P9WI21	40	53.3333	33.3333	26.6667
P9WI23	53.3333	40	26.6667	20
P9WI25	53.3333	66.6667	26.6667	20
P9WI29	40	53.3333	40	20
P9WI31	53.3333	46.6667	20	40
P9WI35	40	80	33.3333	6.66667
P9WI41	46.6667	80	26.6667	20
P9WI49	60	33.3333	26.6667	26.6667
P9WI53	66.6667	73.3333	20	20
P9WI59	53.3333	60	33.3333	20
P9WI61	60	60	13.3333	33.3333
P9WI85	53.3333	40	20	33.3333
P9WI93	33.3333	33.3333	26.6667	20
P9WI97	46.6667	33.3333	26.6667	33.3333
P9WIA3	73.3333	86.6667	0	6.66667
P9WIA5	40	46.6667	13.3333	53.3333
P9WIB7	40	53.3333	40	40
P9WIE7	46.6667	66.6667	33.3333	6.66667
P9WIF3	53.3333	73.3333	40	6.66667
P9WIF9	46.6667	80	26.6667	6.66667
P9WIG5	53.3333	53.3333	33.3333	26.6667
P9WIG9	60	33.3333	33.3333	33.3333
P9WIH7	60	73.3333	33.3333	13.3333
P9WIJ5	40	66.6667	40	26.6667
P9WIJ7	40	73.3333	26.6667	13.3333
P9WIM3	53.3333	66.6667	20	26.6667
P9WIM7	80	26.6667	6.66667	40
P9WIM9	46.6667	66.6667	33.3333	20
P9WIP1	33.3333	33.3333	33.3333	33.3333
P9WIQ9	66.6667	53.3333	13.3333	26.6667
P9WIR1	26.6667	60	53.3333	20
P9WIR5	40	60	33.3333	26.6667
P9WIR9	66.6667	93.3333	13.3333	6.66667
P9WIU1	26.6667	86.6667	40	0
P9WIU3	66.6667	60	20	26.6667
P9WIV1	73.3333	80	6.66667	13.3333
P9WIW3	53.3333	40	20	60
P9WIY5	33.3333	40	46.6667	26.6667
P9WIY7	66.6667	66.6667	0	20
P9WIY9	80	53.3333	13.3333	20
P9WIZ3	46.6667	53.3333	40	33.3333
P9WJ01	60	53.3333	20	20
P9WJ05	60	40	26.6667	40
P9WJ07	40	53.3333	33.3333	13.3333
P9WJ09	40	73.3333	33.3333	20
P9WJ11	60	73.3333	20	6.66667
P9WJ13	66.6667	53.3333	6.66667	20
P9WJ21	33.3333	53.3333	26.6667	20
P9WJ23	26.6667	33.3333	26.6667	33.3333
P9WJ33	33.3333	80	26.6667	0
P9WJ35	60	66.6667	20	26.6667
P9WJ39	46.6667	40	26.6667	33.3333
P9WJ43	40	40	40	20
P9WJ45	40	40	33.3333	33.3333
P9WJ59	26.6667	53.3333	46.6667	26.6667
P9WJ65	60	53.3333	0	26.6667
P9WJ75	40	46.6667	40	26.6667
P9WJ81	20	33.3333	20	46.6667
P9WJ85	40	53.3333	13.3333	20
P9WJ89	40	66.6667	33.3333	20
P9WJ91	46.6667	93.3333	46.6667	0
P9WJB1	40	53.3333	40	46.6667
P9WJB3	73.3333	46.6667	20	46.6667
P9WJB9	40	66.6667	20	6.66667
P9WJC7	33.3333	66.6667	20	20
P9WJC9	20	53.3333	46.6667	40
P9WJD1	33.3333	46.6667	53.3333	33.3333
P9WJD3	46.6667	73.3333	26.6667	13.3333
P9WJE3	66.6667	60	26.6667	26.6667
P9WJE7	66.6667	46.6667	13.3333	33.3333
P9WJH5	60	53.3333	13.3333	26.6667
P9WJI3	46.6667	46.6667	26.6667	26.6667
P9WJJ1	40	73.3333	46.6667	20
P9WJN9	40	53.3333	26.6667	26.6667
P9WJP7	53.3333	86.6667	20	6.66667
P9WJP9	66.6667	53.3333	26.6667	33.3333
P9WJQ5	53.3333	40	20	40
P9WJT1	80	46.6667	0	20
P9WJT3	40	66.6667	46.6667	20
P9WJT5	33.3333	40	53.3333	33.3333
P9WJT7	60	66.6667	13.3333	13.3333
P9WJU3	53.3333	66.6667	13.3333	13.3333
P9WJU9	46.6667	53.3333	33.3333	6.66667
P9WJV7	53.3333	66.6667	26.6667	13.3333
P9WJV9	73.3333	66.6667	13.3333	20
P9WJW7	53.3333	66.6667	20	13.3333
P9WJY5	33.3333	66.6667	20	20
P9WJZ1	46.6667	33.3333	26.6667	40
P9WK01	53.3333	33.3333	20	53.3333
P9WK03	26.6667	40	33.3333	53.3333
P9WK23	53.3333	60	33.3333	20
P9WK29	66.6667	73.3333	0	13.3333
P9WK31	26.6667	26.6667	53.3333	46.6667
P9WK33	40	40	33.3333	40
P9WK43	66.6667	73.3333	26.6667	20
P9WK49	53.3333	46.6667	26.6667	26.6667
P9WK51	53.3333	60	26.6667	6.66667
P9WK53	53.3333	60	33.3333	20
P9WK59	66.6667	53.3333	20	40
P9WK63	33.3333	53.3333	26.6667	26.6667
P9WK67	46.6667	40	33.3333	26.6667
P9WK71	40	40	20	33.3333
P9WK75	40	86.6667	33.3333	0
P9WK77	53.3333	26.6667	13.3333	20
P9WK79	60	60	26.6667	13.3333
P9WK81	60	53.3333	26.6667	20
P9WK89	60	66.6667	20	26.6667
P9WKF1	33.3333	33.3333	46.6667	46.6667
P9WKH7	40	60	40	13.3333
P9WKH9	40	80	26.6667	20
P9WKI5	53.3333	46.6667	20	40
P9WKJ9	53.3333	80	20	0
P9WKK3	60	53.3333	26.6667	40
P9WKR5	66.6667	80	0	6.66667
P9WKT3	80	66.6667	6.66667	26.6667
P9WKU3	66.6667	53.3333	0	40
P9WKV7	60	46.6667	6.66667	33.3333
P9WKX5	60	66.6667	20	33.3333
P9WL01	73.3333	60	13.3333	26.6667
P9WL07	46.6667	66.6667	40	13.3333
P9WL21	46.6667	66.6667	26.6667	20
P9WL29	46.6667	86.6667	33.3333	13.3333
P9WL31	53.3333	73.3333	26.6667	13.3333
P9WL35	40	86.6667	26.6667	6.66667
P9WL41	33.3333	46.6667	33.3333	26.6667
P9WL43	33.3333	53.3333	40	33.3333
P9WL63	66.6667	53.3333	26.6667	26.6667
P9WL75	26.6667	40	60	20
P9WL77	66.6667	53.3333	13.3333	26.6667
P9WL79	53.3333	53.3333	26.6667	33.3333
P9WL81	66.6667	40	6.66667	33.3333
P9WL85	33.3333	40	20	26.6667
P9WL89	60	73.3333	26.6667	20
P9WLA1	73.3333	80	0	20
P9WLC7	46.6667	46.6667	46.6667	33.3333
P9WLD7	53.3333	40	20	26.6667
P9WLE1	46.6667	53.3333	40	26.6667
P9WLF9	53.3333	40	20	46.6667
P9WLI5	60	73.3333	13.3333	20
P9WLI7	60	40	6.66667	53.3333
P9WLJ5	80	53.3333	6.66667	20
P9WLL1	46.6667	60	26.6667	26.6667
P9WLM1	53.3333	53.3333	13.3333	26.6667
P9WLN3	33.3333	60	13.3333	33.3333
P9WLN7	53.3333	53.3333	40	20
P9WLQ1	40	53.3333	40	33.3333
P9WLQ5	60	46.6667	13.3333	20
P9WLQ7	26.6667	33.3333	60	26.6667
P9WLQ9	53.3333	46.6667	6.66667	33.3333
P9WLS3	26.6667	40	33.3333	33.3333
P9WLS5	33.3333	53.3333	60	20
P9WLT5	40	66.6667	46.6667	13.3333
P9WLW9	33.3333	46.6667	46.6667	33.3333
P9WLX9	40	46.6667	53.3333	26.6667
P9WLZ1	46.6667	66.6667	20	20
P9WM07	46.6667	46.6667	33.3333	40
P9WM13	33.3333	53.3333	26.6667	26.6667
P9WM23	33.3333	53.3333	33.3333	26.6667
P9WM45	33.3333	33.3333	33.3333	40
P9WM55	60	46.6667	13.3333	20
P9WM59	53.3333	46.6667	33.3333	26.6667
P9WM61	26.6667	53.3333	40	20
P9WM79	33.3333	46.6667	33.3333	33.3333
P9WM83	46.6667	60	33.3333	26.6667
P9WM87	60	46.6667	26.6667	33.3333
P9WMB3	66.6667	60	13.3333	26.6667
P9WMB7	66.6667	46.6667	6.66667	33.3333
P9WMC5	46.6667	33.3333	13.3333	40
P9WMC7	73.3333	46.6667	6.66667	33.3333
P9WMD3	80	80	0	6.66667
P9WMD5	53.3333	93.3333	20	0
P9WMD9	53.3333	66.6667	20	26.6667
P9WME3	60	73.3333	20	0
P9WME5	60	66.6667	13.3333	13.3333
P9WMF3	46.6667	46.6667	33.3333	26.6667
P9WMF7	53.3333	40	33.3333	40
P9WMG1	40	73.3333	40	20
P9WMH9	73.3333	53.3333	13.3333	6.66667
P9WMI7	60	60	33.3333	26.6667
P9WMJ1	53.3333	73.3333	26.6667	26.6667
P9WMK3	60	46.6667	26.6667	46.6667
[truncated: 2,000 more rows]
