# Supplementary material for: Antimycobacterial cyclic peptide natural products bind and dysregulate stress response chaperones
Source: Research Square preprint supplement (doi:10.21203/rs.3.rs-5493888/v1), 2024-11-28
Supplement: Supplementary file 2 [file 3624d7592958966b1b28d97e.xlsx]

## Sheet: Proteomics_data_and_statistics 
Protein.Ids	Genes	First_Protein_Description	Ecu*_fold_change_log2	Ecu*_BH_pvalue_log10	Ila_E_fold_change_log2	Ila_E_BH_pvalue_log10	dCym_fold_change_log2	dCym_BH_pvalue_log10	DMSO_LFQ_intensity_rep_1	DMSO_LFQ_Intensity_rep_2	DMSO_LFQ_Intensity_rep_3	DMSO_LFQ_Intensity_rep_4	DMSO_LFQ_Intensity_rep_5	DMSO_LFQ_Intensity_rep_6	DMSO_LFQ_Intensity_rep_7	Ecu*_LFQ_Intensity_rep_1	Ecu*_LFQ_Intensity_rep_2	Ecu*_LFQ_Intensity_rep_3	Ecu*_LFQ_Intensity_rep_4	Ecu*_LFQ_Intensity_rep_5	Ecu*_LFQ_Intensity_rep_6	Ila_E_LFQ_Intensity_rep_1	Ila_E_LFQ_Intensity_rep_2	Ila_E_LFQ_Intensity_rep_3	Ila_E_LFQ_Intensity_rep_4	dCym_LFQ_Intensity_rep_1	dCym_LFQ_Intensity_rep_2	dCym_LFQ_Intensity_rep_3	dCym_LFQ_Intensity_rep_4
O53673	hsp	Heat shock protein Hsp (Heat-stress-induced ribosome-binding protein A)	6.58567	5.90136	5.02411	1.62662	2.78686	0.0725504	2304240	2471700	1858730	3428890	11705900	2196400	1860400	155128000	147316000	103105000	324302000	321337000	287503000	80767400	68009100	117482000	69188700	12346400	20421900	19458000	5182860
P9WKZ1	Rv3406	Alpha-ketoglutarate-dependent sulfate ester dioxygenase	3.92151	7.80843	0.850441	0.119558	1.25999	0.173998	747949	810376	1177090	986386	2988170	3337650	1348270	12548100	20741500	14582000	14930900	21492200	26181100	1910060	2334650	3241720	1505460	2160140	3313000	3634350	2325140
P9WMK1	hspX	Alpha-crystallin	3.17694	1.38936	2.7052	0.623415	3.36903	1.19004	4436460	8359870	46611500	1375040	17354400	28382200	129738000	67134700	180853000	133048000	8810620	335840000	259301000	47044700	117720000	152832000	108633000	47272400	253640000	125955000	232652000
I6Y4S7	Rv0771	Possible 4-carboxymuconolactone decarboxylase (CMD)	2.89144	3.38527	0.576818	0.0034932	1.15219	0.172963	1353030	1194660	923171	1338350	2124120	2185370	3533390	4877300	12403100	8176400	4515820	11902800	17103300	1001850	1651380	2384860	2392830	1011390	3080890	2933360	7636150
P9WL07	Rv3127	Uncharacterized protein Rv3127	2.60429	1.83446	1.1913	0.185538	0.832801	0.0425574	1161450	1726340	4006260	NA	1951340	2043310	4850160	3805000	12937200	11354000	954718	16279100	19562400	2982720	2299030	6139400	6438650	1063080	4276040	2838990	6409000
O06241	Rv2134c	Conserved protein	2.35951	7.33242	1.27049	2.91237	1.27915	1.65738	2615540	3799710	5628560	2708020	2886640	3753400	2998570	16118200	13524600	13886600	14658900	17390900	18223900	6691420	7608250	14618600	6859440	5913930	7903170	9528920	6651640
P95059	atsA	Possible arylsulfatase AtsA (Aryl-sulfate sulphohydrolase) (Arylsulphatase)	2.29738	4.98808	-0.874426	0.154963	-0.395033	0.0454874	2789820	2955950	2370950	2603860	NA	1768070	2753420	15804600	10529900	18670700	17209600	5634870	8677520	1461120	NA	1823040	1153200	1817650	2098130	2412840	1975930
O50430	TB8.4	Low molecular weight T-cell antigen TB8.4	2.23469	3.71498	0.999944	0.561178	0.588504	0.194782	4281920	8531780	8630510	6034930	10488000	7842410	11425900	23113300	63504100	47469600	32842000	29091500	79106600	10432700	22927500	24608100	11198300	8035140	17623100	20558500	7600230
P9WF59	vapC41	Ribonuclease VapC41	2.17313	4.09253	-0.336305	0.0526699	-0.102536	0.0186941	413917	380303	540023	408041	270599	428857	284669	1527080	1518400	1128510	2153460	3043670	3809690	418724	NA	323196	62710.2	177976	664289	582118	139583
P9WGQ9	Rv0769	Uncharacterized oxidoreductase Rv0769	2.07575	5.88035	-0.4058	0.290634	0.688903	0.309638	5848860	5628710	7066650	4987180	6313140	5854340	6512600	15927700	31604300	24498600	12995600	24860800	28802800	3889780	2764180	4948140	5135760	6280060	9569540	9305520	10014400
P9WGI5	sigB	RNA polymerase sigma factor SigB	1.95665	1.8066	2.72419	3.96746	1.63743	0.788393	1586400	1822430	2185470	2431350	5635150	2513450	2652330	7501440	8284440	4862680	10590600	17198200	15151000	11703400	20428700	22516000	6635700	4656540	10471900	10532300	3455190
O53907	impA	Probable inositol 1-monophosphatase ImpA	1.84735	0.0759118	0.945851	0.135332	1.26372	0.0348749	140532	227748	4368660	220092	860883	322986	363436	587139	1421740	902722	754177	1589100	1852860	459517	NA	NA	784835	NA	1119840	506567	775536
P9WQ63	mbtB	Phenyloxazoline synthase MbtB	1.81612	4.74617	0.736649	0.709185	-0.72291	0.253935	1787170	1654230	1017410	1440940	920562	1270350	896549	2907000	3663310	3306450	5481520	6440430	5283330	2490040	1043190	2987010	1743530	857297	833099	706245	559194
P9WJD3	espE	ESX-1 secretion-associated protein EspE	1.75039	1.12227	1.24174	0.502534	0.0699845	0.0121813	8126610	10766900	23064900	11109000	12152600	23338600	14929400	13208300	65319800	28241900	21273800	53532600	139856000	8117520	44124200	64843200	13353500	5353750	15031900	21198700	10481400
P9WFA1	vapC13	Ribonuclease VapC13	1.74457	0.757084	1.18687	0.532217	0.476016	0.0393406	884005	1127560	1108620	783114	2066550	3438270	2851110	1666120	7496530	2192960	949754	5363810	11060300	482957	8536070	4290590	843388	464002	1901840	1785180	1351460
O53530	Rv2256c	Uncharacterized protein	1.74144	0.221114	4.22137	4.41106	1.63955	0.116593	943193	351684	1319480	900498	2324500	1781370	NA	1383190	4052480	1742640	3513170	5955480	6544800	9290430	25776400	31067500	16430200	NA	3524880	3626410	2707520
P9WHW9	PPE68	PPE family immunomodulator PPE68	1.71659	1.78301	-0.223038	0.0641314	-0.615177	0.088089	5046830	6110350	10040400	6664480	14675000	14035300	17199500	16913800	65917800	26620000	12680800	39377300	107639000	2927420	8818300	10871600	8386110	2310830	6630110	6479640	7859110
P9WIZ9	acg	Putative NAD(P)H nitroreductase acg	1.70461	0.620632	-0.0139192	0.00335918	0.321969	0.577834	NA	542058	2115390	255921	1828210	1793040	3320950	1697340	6910290	4892870	630829	7810350	8871670	842073	1283950	2302530	2847630	13313500	1830520	1560750	2696170
P9WLP9	mbcT	NAD(+) phosphorylase MbcT	1.69876	2.72064	-0.694972	0.260004	-0.120043	0.0579797	2169370	1859460	1879210	1555430	1487540	1529730	1528500	5116340	5572830	6331700	4982190	1137170	1937760	1122340	NA	NA	799305	1729850	1548320	1314170	1243530
P9WPH7	eccA2	ESX-2 secretion system protein EccA2	1.65772	4.17321	0.945327	0.956127	-2.65883	0.418792	762046	882488	798860	927284	743273	880891	632811	3241750	1796010	2909940	4760240	1771150	2131160	1605380	1178260	1856350	1471230	205745	NA	NA	47250.3
P9WHQ7	purF	Amidophosphoribosyltransferase	1.65624	3.04082	0.992491	0.534581	-0.360511	0.0564426	3575190	3151350	3038560	3218180	2186730	2851540	2885300	11398500	5044310	6220190	22394900	8022510	11132200	8186540	2243800	5848470	6242670	3063740	1865820	1945880	2787520
P9WLQ5;P9WM55	Rv1148c;Rv1945	Uncharacterized protein Rv1945	1.64164	3.65865	3.21127	9.13193	-0.113755	0.0194509	380241	401945	398367	389975	NA	373616	204879	1192910	960370	1121450	1788790	1210320	1668110	3566740	NA	3133890	4233520	279392	NA	NA	432426
P9WMH7	clgR	Transcriptional regulator ClgR	1.63388	0.224306	3.67261	2.73442	1.86746	0.150902	NA	561900	NA	310309	755471	NA	517139	1157990	2170730	1052940	1370370	1978380	2932790	3155990	11589600	10216400	3543100	NA	2042210	1968650	1087350
P9WQ77	lat	Probable L-lysine-epsilon aminotransferase	1.62555	3.65532	0.119462	0.0519615	-0.735108	0.218844	1884520	2325820	2568530	2430180	5190490	3055010	2548200	5473240	12060100	6978690	5666930	13764200	8746740	2047820	3488550	4653010	1425670	1513020	2456790	1496330	1548760
P9WI05	PPE32	Uncharacterized PPE family protein PPE32	1.6045	1.11895	1.90834	1.2275	1.48536	0.294125	1666800	1258380	2913700	1718530	1551660	3022710	4097290	2015820	8054960	3377440	2484620	7074300	14410900	3461710	5976580	8313190	6925360	2127180	4506830	5116460	5177870
O53634	gca	Possible GDP-mannose 4,6-dehydratase Gca (GDP-D-mannose dehydratase)	1.56383	3.66964	-1.23234	0.427268	-2.0107	0.477544	2592230	2590300	2386920	2440800	2061730	1711510	1636650	8907370	8996590	10881800	5205880	2721110	3764720	1084370	NA	1015940	475575	1185830	666682	414692	517956
P9WQB7	ahpC	Alkyl hydroperoxide reductase C	1.51194	0.412058	3.82912	7.81197	0.924421	0.141215	1349510	2006350	1751900	4403970	1481410	1753290	1617710	3926470	6766640	3113690	4252300	5940100	5740300	20167300	29631500	37802700	18487100	2542720	5558680	4107220	2187190
I6YGX9;Q79FN7	moxR1;moxR2	Probable methanol dehydrogenase transcriptional regulatory protein MoxR2	1.48457	1.441	0.582505	0.260331	0.232125	0.0256548	16467500	21338300	30163900	18883100	13967200	27946900	18494700	32195200	73487400	27859400	24087000	83659800	164393000	14123400	58747200	42038800	14514100	12341300	28192600	34205200	16166200
P9WJC1	espK	ESX-1 secretion-associated protein EspK	1.47055	3.95162	1.1753	1.10607	-0.1349	0.0429678	4846610	3523020	5057580	5893900	2236840	4435290	4279110	12827500	11519500	17264600	17778800	8463380	11755400	11084600	1791030	8948660	13460700	4492290	3050240	3586440	4824400
I6Y778	fabG4	3-oxoacyl-[acyl-carrier-protein] reductase [NADH]	1.44884	3.04311	0.427317	0.207892	1.10365	1.03589	83774200	102161000	101535000	96982500	141246000	122480000	161173000	195364000	459719000	276185000	157070000	355968000	281592000	103583000	142538000	185716000	132220000	126272000	246870000	242879000	196203000
O53666	fadE5	Broad-specificity linear acyl-CoA dehydrogenase FadE5	1.41164	8.23688	-0.0697293	0.173938	0.285578	0.54593	11102100	12161100	12743200	14800600	8514880	12805000	9290350	36960200	28868900	37206400	35837700	27831500	26798000	14008200	4643820	12415800	10758800	16076200	14840900	14805400	12873300
P9WH75	nrdE	Ribonucleoside-diphosphate reductase subunit alpha	1.40296	3.6685	1.11007	1.15196	-0.188881	0.0374368	22716100	22100500	21279500	25964800	9511500	19384000	16282200	66723600	39383600	58031500	94975800	45960400	54512700	58055000	9460650	46206900	45659600	30292300	17247900	18198700	19137700
V5QRX7	Rv3098A	Putative toxin Rv3098A/RVBD_3098A	1.39108	2.32293	-0.556343	0.0545435	-0.144964	0.0553436	2066180	3091080	5487980	2053090	8359890	4419190	4929930	7063200	20943200	9149740	5210420	20005200	14031100	1889900	6636040	4120410	1451960	1326730	5012740	4714540	3278910
P9WNK5;B5TV88	esxB	ESAT-6-like protein EsxB	1.38535	0.623857	2.01402	1.4638	1.8896	0.895195	3892490	3278590	3486590	5910620	5084960	3936520	5457340	9533310	35605700	11033900	7118550	5954170	24918500	9944860	46319600	21842100	9957680	6447280	19335500	39113200	9836770
I6YF08	TB22.2	Esterase Rv3036c	1.38177	1.82576	1.73559	2.82433	1.12036	0.802274	303124	468321	540384	320064	NA	469018	998654	1571510	1361090	1081510	585738	191712	2069760	1153350	1575560	1784700	1545930	871607	1101630	947181	1090610
P9WF97	vapC15	Ribonuclease VapC15	1.36414	1.5594	0.693246	0.56175	-0.0243605	0.0186941	787139	1060000	1711030	1387390	1464500	1982060	818466	NA	3571450	963663	2139000	6143230	8384680	1083950	4631000	3402640	881097	NA	1364160	1922100	649173
P9WLZ7	Rv1364c	Multidomain regulatory protein Rv1364c	1.35629	3.95874	1.03964	1.00607	-0.73772	0.403853	1196730	1338460	1266680	1335290	2005740	867968	1391330	3592680	2833320	4245710	4680950	2512460	3244680	3009980	732684	2479960	3050000	800755	525942	NA	930777
P71740	lppR	Probable conserved lipoprotein LppR	1.34485	0.997622	-0.216577	0.0266941	-0.295957	0.0365352	1187480	994738	905421	1895840	NA	1374750	903341	2389120	3335980	1016680	1726340	3153810	11227100	1146590	NA	NA	731438	814905	962581	1175810	750958
P9WMK3	hrcA	Heat-inducible transcription repressor HrcA	1.33843	4.93343	0.414808	0.0869339	-1.39297	1.47029	6317460	4856300	6674320	5031630	4731080	6911730	4985250	12935000	10186600	12270300	12512500	21686500	13426300	7977590	2981030	7395650	6019900	1958010	1338310	2321860	1873890
P9WFJ1	Rv0145	Putative S-adenosyl-L-methionine-dependent methyltransferase Rv0145	1.32588	6.13081	0.123417	0.318159	-0.220371	0.177511	844299	720207	806353	647779	586814	815220	624761	2262250	1792100	1607020	1339860	2443650	1818820	1084750	NA	784530	632642	524452	618186	NA	658288
O53311	Rv3161c	Possible dioxygenase	1.32281	7.47008	-0.208163	0.0893791	-0.0779752	0.185921	18105900	18357500	18218100	18064700	6559860	14264600	8547040	50147800	40231200	50301400	57559600	37006800	39717600	17407300	5472870	16516000	14759000	15237300	22058400	18991200	9601270
P9WIS1	bkdB	3-methyl-2-oxobutanoate dehydrogenase subunit beta	1.31976	2.72741	1.84455	4.32371	-0.0858413	0.000585081	4261310	4934540	4535150	4326220	2875470	4259660	3557970	10338600	9187010	9895340	13510900	11355000	10936000	19489900	6447120	16573000	14035200	3918540	4542800	3908280	4111770
P9WNV7	dnaJ2	Chaperone protein DnaJ 2	1.31358	5.02976	0.23147	0.179131	-0.0386029	0.000585081	15785700	16910900	14207500	16417800	10885200	14265600	11236700	41010500	34719600	36196800	40628800	20575000	26297000	21973800	8150160	19872600	13623900	17384500	13833300	13944600	9265260
P9WPC9	clpC1	ATP-dependent Clp protease ATP-binding subunit ClpC1	1.29236	4.14889	-1.97767	1.8884	-0.5178	0.408007	79389200	90816400	93727400	91774900	96628200	125780000	137144000	178590000	305283000	173727000	156591000	345854000	280539000	20102800	27492000	31487100	19050800	50589300	86860600	75851800	55073400
P9WF61	vapC40	Ribonuclease VapC40	1.26366	1.26876	0.153307	0.000414107	0.702583	0.103612	1069450	881625	2259400	1143420	1630460	1631070	1082810	1732120	3316320	1730320	2174460	5065120	10095800	572390	1970840	2086250	448787	NA	1860820	2262280	1667870
P9WL63	Rv2629	Uncharacterized protein Rv2629	1.2445	3.48612	0.987368	2.61864	0.442313	0.363061	2109450	2076990	2675200	1875170	2280770	1982680	2975640	3557500	5865990	5199910	3531690	5288580	4796170	4291630	2774330	5695300	4072610	2673060	3059500	2640400	3635110
P9WJW1	miaA	tRNA dimethylallyltransferase	1.23298	2.98874	0.388256	0.321319	0.238826	0.125849	2956980	3875230	3869990	2448210	3473940	3049820	2852060	4721670	9926650	5287090	4420110	9583330	9050210	3061030	5003030	4922240	2403350	4461660	3136580	4061190	3051270
P9WLP1	Rv1996	Universal stress protein Rv1996	1.23288	2.15827	0.171141	0.199446	0.519918	0.332827	4069570	6421550	8055260	3292380	8386880	6450560	4579140	8684000	18811500	11374400	6060850	22759600	24868700	5745730	8714940	10002500	4688100	4939080	11518900	11834700	6896480
P9WII3	mazF6	Endoribonuclease MazF6	1.22714	0.628757	0.0266585	0.0534738	0.965748	0.339884	1685470	2568080	4693480	2754420	2706680	4644000	5865420	2547360	8618250	4278080	2223570	8807730	11716600	1055580	3335130	5649400	2276450	2317500	7305100	7905120	3454080
I6X9R9	aldA	Probable aldehyde dehydrogenase NAD dependent AldA (Aldehyde dehydrogenase [NAD+])	1.20929	2.78613	-0.802799	0.253024	-0.887639	0.303715	2014610	1771460	1676280	1970680	1139720	1692940	1341680	5734100	3047960	6035170	4781020	1178600	2284700	1337910	NA	970454	934376	1192430	906936	758161	923125
O05443	Rv3902c	Immunity factor for TNT	1.19752	1.59326	-0.224034	0.023044	0.0490092	0.0183416	2792150	2033930	5112140	2344590	3315230	4614580	3601580	3371760	9623760	5582830	3979160	11212600	10977900	1947450	3729340	4905520	1605160	1669490	4754980	4951230	2104590
O07432	Rv0188	Probable conserved transmembrane protein	1.19314	0.83894	1.7089	1.64462	0.935778	0.720541	5039470	5678320	3927440	5499340	NA	3372730	2082620	7739400	18805100	5367750	11846900	8655910	13203600	22634200	3333350	20796800	8517140	17723500	7618050	9534950	7608320
P9WKS7;P9WKR9	Rv0628c	Uncharacterized protein Rv0628c	1.19313	4.17572	0.603588	1.16376	-0.50578	0.0348749	458650	682720	584528	711851	520735	642401	296613	1328570	2464290	1344450	1216790	1607730	1155570	1054130	722240	1243830	655021	486522	336820	852341	301655
I6Y8F7	mmpR5	HTH-type transcriptional regulator MmpR5	1.19096	1.79067	0.894981	0.962621	0.375689	0.175973	14546900	19052200	21135400	12776300	38283500	23249200	15505600	36838900	44983800	32644500	42010200	67873800	80590200	19775400	51083000	62816000	14901000	16110600	33328300	45346700	10257200
P9WQH3	hsaG	Propanal dehydrogenase (CoA-propanoylating)	1.18362	6.2154	0.281294	1.08737	0.165929	0.135773	5060520	3143780	4349740	4372940	4863300	4346520	4811660	11239900	9262430	11352800	9967290	7262200	9898660	5309740	8640670	4440010	5318990	5087330	4724570	4674920	5347080
O53661	Rv0238	Possible transcriptional regulatory protein (Probably TetR-family)	1.18352	1.52149	0.305965	0.143589	-0.667427	0.0579797	NA	1149840	1663110	1000940	633116	1747100	1616900	1517240	4014150	2077970	2269970	7091680	9501320	1406520	2663440	2013850	710270	412783	820240	1610140	921779
O86361	fadA2	Probable acetyl-CoA acyltransferase FadA2 (3-ketoacyl-CoA thiolase) (Beta-ketothiolase)	1.17946	3.60791	0.0527971	0.00365391	0.522163	1.03322	116317000	111644000	106033000	115121000	86923900	111029000	96782500	293895000	219478000	283464000	296913000	117313000	156434000	156889000	41089900	121169000	109166000	205182000	160220000	158679000	144638000
P9WQ91	aspC	Alanine aminotransferase	1.16966	5.06134	1.02449	2.5719	0.843139	2.0105	10195700	8111560	9399800	7208110	3601630	7926340	6595580	24036400	17620600	18041300	18830600	14938100	17158800	17288500	8529520	18609800	14959700	15223900	12780000	13215000	15555500
I6Y0L1	mbtE	Mycobactin synthetase protein B	1.16393	5.68404	0.130535	0.120378	-0.869938	0.887995	3099760	3732910	2689420	4103780	1444110	2956090	2181060	5949020	7305140	5566850	7298200	7435580	5895440	4159560	1692570	3646280	2825780	1836540	2535100	1398430	1023120
Q79FN7	moxR1	Probable transcriptional regulatory protein MoxR1	1.16123	1.2743	0.709846	0.334007	0.150526	0.00840981	141610000	169031000	191984000	151890000	188112000	250203000	165205000	240516000	515554000	236614000	193427000	589323000	1327120000	159527000	446553000	393417000	157725000	100844000	248858000	234590000	140650000
P9WPC5	clpP1	ATP-dependent Clp protease proteolytic subunit 1	1.1608	2.92646	0.424244	0.903412	0.359719	0.173777	84385900	102882000	112414000	82974300	97849700	91043500	71963400	212486000	203616000	163334000	203497000	141484000	243929000	128802000	115535000	228183000	49169900	94811700	138838000	147746000	25808100
P9WGI1;P9WGI5	sigA;sigB	RNA polymerase sigma factor SigA	1.16003	2.32317	0.661463	1.17111	-0.695403	0.335123	8586040	6177550	10505100	5243870	2040140	7987410	4052170	16202200	5885750	7258190	14626600	17527700	12982300	10298800	9243080	14999100	6170620	4030310	2834650	5480970	3599420
P9WFX1	mbtI	Salicylate synthase	1.15969	2.71945	-0.453403	0.0203642	-0.815155	0.152978	442985	211705	597951	577673	758564	750958	149577	958091	463262	1102920	1755140	1607350	1478240	671584	NA	413062	421885	450529	328319	NA	233185
O53494	Rv2052c	Conserved protein	1.15364	2.75374	0.410709	0.267909	0.239742	0.28225	2311350	2225670	2138850	3187180	2073410	2264410	1563610	5329840	5116450	4786660	6292950	2783070	1933530	3584620	1483130	3157970	2759370	3649010	2414980	2841080	2407940
P9WF19	vapB5	Putative antitoxin VapB5	1.12991	0.627899	0.719959	0.236774	1.11354	0.884097	1704270	2005620	1574440	1476250	4265180	1857000	2620560	NA	674139	NA	7453790	NA	NA	2120280	3227050	3254420	2890410	2682930	4985600	4973540	3062650
P9WKU9	Rv0487	Uncharacterized protein Rv0487	1.12801	2.28751	0.108922	0.0946245	0.443032	0.123205	1523440	1095770	2858580	1198580	1990270	2383230	1602480	2293440	3762910	3241750	2925490	7454600	5563550	2027510	863825	1778680	1677620	2366030	2400280	1990980	1858870
P9WIN7	mtb12	Low molecular weight antigen MTB12	1.1257	1.16964	0.232474	0.00162464	0.886732	0.296052	6476480	5071080	5320270	4980300	10565000	9880180	13453000	11149400	19775200	7242310	4653730	17115000	31844300	5000200	10480600	9413510	5804250	7815720	14025200	12883800	11066000
I6YA29	Rv2714	Conserved alanine and leucine rich protein	1.12552	2.57458	0.681173	0.750718	0.694245	0.840996	7596860	5507840	5132080	6484770	5525220	8080820	9085050	15362200	11668100	13496100	14800800	6394020	22583900	12159900	4923970	14292900	8636010	13155200	9892500	11092700	8245400
P9WPB1;Q6MX39	mmaA1;umaA	Mycolic acid methyltransferase MmaA1	1.1227	2.04801	0.0358357	0.00162464	0.0749948	0.0411491	2425530	2838080	5834760	3961170	495240	3340690	5160430	4986180	6098340	8450670	5142610	11628800	10960200	2337700	2926850	3922570	5747820	1771120	3523020	3514860	8626710
P9WNC9	folP2	Inactive dihydropteroate synthase 2	1.11391	2.57643	1.09503	2.81224	0.542583	0.329976	1769960	2131590	2262780	1770610	2622730	2449850	2397350	3262700	6651300	3596090	2720360	6198640	7191190	4041180	5464860	5969160	4202500	1906520	3424170	3628080	3167660
O06538	Rv1138c	Possible oxidoreductase	1.11275	1.33634	0.595137	0.0683628	0.841515	0.0982183	507359	824806	323062	241148	NA	473306	667603	5561800	514550	NA	203435	1060380	1292510	535689	654810	927376	826598	547228	1187550	1049680	707604
P9WPC3	clpP2	ATP-dependent Clp protease proteolytic subunit 2	1.09333	3.44739	0.43186	1.00463	0.279103	0.142281	133274000	133373000	162014000	132256000	147032000	159031000	148622000	279990000	377856000	281454000	257179000	345978000	502591000	217004000	179680000	354957000	104687000	150977000	205852000	209589000	80196000
P9WN57	folE	GTP cyclohydrolase 1	1.08766	4.98808	-0.0161191	0.112329	0.229657	0.107891	7576040	7582470	8371060	7188080	4273460	7098450	6208500	16179600	12635300	12984100	15087700	18388500	15465800	9674320	4072660	10156100	4542110	8835280	8562170	8294680	2343540
O06592	Rv1598c	Conserved protein	1.07378	1.22405	0.48849	0.326477	0.262218	0.0792182	17868900	29698800	41498200	20196100	38948700	40063900	22394700	36332400	101970000	40526200	31773300	117062000	84502500	16482400	69780300	66851000	8196020	20661000	50575800	52760500	9766970
P9WNY3	Rv0770	Uncharacterized oxidoreductase Rv0770	1.07028	7.7381	-0.573446	1.0821	0.297652	0.523414	1382470	1454630	1428130	1405320	1330280	1786770	1706900	3309570	2901760	3095920	2519290	2631370	3521140	959717	NA	1455130	860823	1744840	1624830	1830830	1765910
O05884	Rv3239c	Probable conserved transmembrane transport protein	1.06734	0.752171	-0.300126	0.20422	0.927352	0.1443	18291500	20221900	NA	16564600	NA	8739520	136885	54611300	1708310	1331460	20131700	49292600	170327000	23614800	73343500	3292130	111302	38344100	32419400	30585100	495332
P95072	sppA	Possible protease IV SppA (Endopeptidase IV) (Signal peptide peptidase)	1.05874	1.94409	1.57533	5.0162	1.28675	2.6847	8182810	8519140	8884540	8915760	8213960	9135860	10178400	13587500	22093300	13056900	15262500	31097200	21752500	23296700	29579500	40451700	23373000	19014700	26318900	24018500	19334200
P9WM49	Rv1265	Uncharacterized protein Rv1265	1.05713	5.14979	0.748344	2.49356	0.560261	1.08862	9403470	8117480	9116210	7796920	14913200	11016100	10748700	23011000	19115900	16563200	19922200	23526900	19211000	16256900	15336200	20277900	11431100	11758900	15972600	16533300	9935920
P96415	Rv0232	Probable transcriptional regulatory protein (Probably TetR/AcrR-family)	1.05583	0.729793	1.25495	0.981212	1.6872	1.67291	5504520	7504080	9165160	4840410	13344300	10106300	9076160	12708900	24727900	13009300	11768700	37731100	30256900	9886010	33436200	37494900	5409920	15570200	42885900	48498500	9545520
P9WFD7	Rv2623	Universal stress protein Rv2623	1.05456	0.824201	-0.300391	0.00640125	0.581014	0.432786	15911000	25198200	33211000	7228880	52644400	41546300	34161800	21613400	88189000	49774700	7440480	118493000	111598000	17290900	36645900	45254900	16082600	20761000	87247100	66756900	32603800
O86318	accD2	Probable biotin-dependent acyl-coenzyme A carboxylase beta2 subunit	1.04595	3.65174	0.501152	0.409949	-0.15081	0.0183416	762673	618334	921410	956021	511267	857066	840517	2226790	1244090	2697910	2504830	1083050	1199700	1189620	NA	860015	1212660	838063	809546	643482	704636
P95186	fadE23	Probable acyl-CoA dehydrogenase FadE23	1.03528	2.85048	0.181052	0.0179951	0.934162	1.28422	24684000	17079100	22085900	25009100	14909000	16743900	12965600	42403000	22472000	28849000	61272700	35169600	34837900	27759400	9814890	22638500	16087000	32768500	32500300	34928600	21353400
P9WKE1	tmk	Thymidylate kinase	1.0072	1.47883	0.166814	0.15225	0.256628	0.0198293	1405490	2438630	3951780	1527850	3036220	3075580	2092230	3319380	6605290	3491630	2332600	7138260	6311710	1091980	4558550	3992040	1483060	1488340	3203990	3069170	2757610
P9WLN3	Rv2004c	Uncharacterized protein Rv2004c	1.00407	0.875469	-0.61251	0.0478622	-0.255086	0.0982183	506106	NA	767646	NA	NA	433710	141635	708658	487320	1046090	838857	1753370	1389320	267651	1107600	347043	227587	1293280	489709	219513	297798
P9WPD1;P9WPC9	clpB;clpC1	ATP-dependent Clp protease ATP-binding subunit ClpC1	1.00177	3.73495	-0.62495	1.49569	-0.305785	0.608383	23523300	20324800	21073900	21126300	27926800	26439400	39934800	39073800	60476100	41308200	31354200	60757700	52900700	12640000	10516800	18066300	17867000	15598400	21421600	17227100	20833700
O86374	pmmA	Probable phosphomannomutase PmmA (PMM) (Phosphomannose mutase)	1.00177	2.3622	0.989347	1.91897	-0.0558658	0.0198293	6284320	5285730	5832610	6634570	4779660	5224870	5401620	13317100	9682650	11950300	14016700	5546130	7557880	13850700	5735690	11879900	9567630	7040660	4264080	5121580	5271320
P9WIS3	bkdA	3-methyl-2-oxobutanoate dehydrogenase subunit alpha	0.995362	1.17423	1.9634	3.19868	-0.375326	0.0802953	2243450	2391170	2285490	2292450	2863450	2143250	2145220	4894840	4207350	4688410	6133280	4424210	4402060	10719600	2183930	9236190	8589730	2102780	1949280	1574630	1540320
P9WFI3	Rv0830	Putative S-adenosyl-L-methionine-dependent methyltransferase Rv0830	0.991468	4.53195	-0.205952	0.0567278	-2.17918	2.13775	3175640	5030650	5695170	4113690	5140120	4401640	2916440	7990740	14734000	8632090	7832530	8870650	9719840	3146190	4485960	5657970	2375650	913510	1640320	1030260	771400
P9WL83	Rv2576c	Uncharacterized protein Rv2576c	0.989524	0.46904	1.63327	0.990094	2.07954	1.39027	1754390	1613970	2995980	1682590	2429900	2769870	NA	3708590	NA	NA	2746090	4599440	6662530	1788500	6169920	7973160	6810410	1134480	8715750	9130170	8970150
P9WPP9	cyp51	Lanosterol 14-alpha demethylase	0.987489	3.06706	-0.748661	0.251263	-0.681564	0.167513	1032610	1043930	1107460	1171060	NA	860512	484769	2543320	1631480	2485740	3076620	1435260	1458890	786167	NA	NA	449698	957743	647350	NA	393374
P9WG65	mpt53	Soluble secreted antigen MPT53	0.986823	0.895596	-0.286395	0.0219389	0.542878	0.303715	10702800	21653800	24408700	13841900	21041400	28463400	28203400	18376900	68828300	38242500	13173100	47585200	61633600	8227590	23747200	39918600	11762800	13605500	44374700	44177700	18916100
P9WKV1	Rv0485	Transcriptional regulator Rv0485	0.985067	0.980861	0.847138	0.950517	0.259284	0.040972	901141	2044850	804603	1679310	NA	896434	368646	1587780	2659610	948906	2590530	1970350	1565190	2910460	1363510	1870200	829072	1250540	962000	1189490	360780
I6X7Z3	Rv3645	Probable conserved transmembrane protein	0.981854	2.4456	0.841614	1.39863	0.231715	0.344514	4413670	3822360	4923740	4401580	2411550	3527680	2502130	7141140	3622680	5630520	10247800	8199840	7957200	8162720	3318460	6634680	7065070	6180700	4249380	4509290	4467370
P9WMA9	Rv0079	Dormancy associated translation inhibitor	0.978811	0.96367	0.841604	1.0746	1.05039	0.477544	1099630	1900090	2725930	701414	491322	2557140	2247060	1709360	4175050	3314500	740618	8109340	6893840	2282990	3442510	6955260	3367570	1545860	4312270	3919460	3951070
P9WFJ3	Rv0146	Putative S-adenosyl-L-methionine-dependent methyltransferase Rv0146	0.978241	6.48514	-0.501475	0.87191	-0.762971	1.85057	5411580	4473500	5563540	6618530	3774220	5025290	4055920	9929740	8930990	9781590	10497000	12692100	9870520	5040870	2160900	4777510	2322060	2941860	3226110	2980760	1405870
O53846	lpqQ	Possible lipoprotein LpqQ	0.968489	1.7424	0.0829986	0.140067	-0.569847	0.111282	1618180	NA	1439240	1009840	NA	653446	660937	2979590	866598	1967350	2285020	1791840	1984740	1739820	NA	1069640	748090	1512660	699718	660917	301674
P9WMN7	moeZ	Probable adenylyltransferase/sulfurtransferase MoeZ	0.967895	6.64182	0.303382	0.322345	-0.82671	2.12443	17420600	13955600	16364900	17106000	13442500	14906600	15707100	31150300	31016800	33754100	30428900	30223700	27925400	22771000	9960770	17151500	21614700	10008800	7702950	7622410	11291900
O07738	Rv1894c	NMO domain-containing protein	0.954224	4.02288	-0.252803	0.0990201	-0.21656	0.0348749	5304410	4802140	5110010	5547410	2676020	4629600	4228150	11841800	8220220	9275490	11186100	5908080	9333160	6048480	2059570	5368860	2691670	5988700	4104460	4161130	2439220
O33291	Rv2749	Conserved protein	0.950045	0.822909	0.0727291	0.243886	0.0663949	0.0419183	2604320	5942760	5872050	7082880	3434860	10018400	5498550	5076090	14029100	8659710	6118380	14040800	33108500	2681970	9669350	17180500	2308320	2863920	10136600	9433290	2263160
O05819	mbtF	Mycobactin synthetase protein B	0.947425	5.40014	-0.0114963	0.745643	-1.11823	1.81067	1105500	1125420	946163	1236020	1073460	975386	711090	2128940	1664750	2321470	2148120	1846130	2011240	1708190	NA	976943	1064940	494499	611434	NA	339612
P9WIA3	Rv2368c	PhoH-like protein	0.946078	2.71917	1.01058	2.30845	-0.130581	0.0994422	2004720	2357150	3140350	2983600	2231620	3764830	2086960	4617630	3566150	4465070	4226880	7706200	5913530	4715810	4782200	6145300	2892160	1548990	3206510	2757350	1287460
I6WZD9	Rv0765c	Probable oxidoreductase	0.945667	3.7333	-0.341223	0.335931	0.360098	0.445629	4139400	3687990	4622930	2416900	6388100	4755710	3636000	8016640	8970350	8657960	4498770	7928980	7276630	2464670	4981560	3406190	3128860	4972680	5854710	5653270	3678990
P9WQA9	alr	Alanine racemase	0.929546	2.41897	0.427323	0.689038	0.454858	0.285874	4698880	5178980	6486020	4188010	4529810	5623710	5858390	6590700	11796400	7932170	6709910	16678500	11954600	6382620	7164450	8547710	6764270	4711340	6863400	7979270	7333720
O33259	metH	Methionine synthase	0.925446	2.22575	0.478375	0.461039	-0.88056	0.352849	4586070	5262970	4958740	5683080	2678480	4635550	3692100	12384500	7206340	10402000	11364000	3870350	6003060	9184130	2443260	7141170	5775080	3878980	1945540	2653750	2381910
P9WKR3	Rv0877	Uncharacterized protein Rv0877	0.922613	3.46959	0.0311663	0.183474	-0.260189	0.205092	3764330	4406990	4084790	3803010	3278590	3686180	3735580	7820320	6019450	6452400	7818520	NA	NA	6669670	2120050	4378170	3314900	3640870	2835700	3450570	2803940
O33282	Rv2739c	Possible alanine rich transferase	0.920444	1.3839	-0.205869	0.0128227	0.400187	0.035115	5097630	8738980	9335360	6956720	9707970	7247030	9966490	62131100	1444840	29655000	648057	114370000	3425500	5501070	7495040	8554130	7658640	7866900	12597900	11123300	11942000
O53219	vapC38	Ribonuclease VapC38	0.91781	1.50622	-0.754382	0.0896402	-0.440503	0.0930072	1614800	2174750	2807080	1821340	2723700	3453860	413119	2833980	7625790	2873110	2174930	7931750	5344160	676375	3576910	1902010	376559	822489	2440160	2382560	480027
O53737	Rv0452	Possible transcriptional regulatory protein	0.916525	2.29069	0.139059	0.194712	0.272507	0.152569	1588690	2362260	2656410	2619730	NA	1870010	1718400	4243620	NA	3799970	2397330	3994340	8305350	2131460	2529060	3422740	1839690	2022920	3211210	2765190	2346990
P9WGQ1	Rv1856c	Putative oxidoreductase Rv1856c	0.912484	6.18381	0.226985	0.623659	0.818409	4.32567	31350100	28958400	32627300	33648200	28219500	35837700	34237100	58435800	73619400	64391900	56215100	52599200	77814200	36810500	32100300	45225500	39562600	45569900	60435100	62946800	54638800
P72050	Rv3784	Possible dTDP-glucose 4,6-dehydratase	0.912147	0.280874	0.00939045	0.435463	-0.1691	0.403853	590610	641054	800175	411004	NA	472783	2431280	1380950	447664	1003110	1158900	1303430	NA	685366	360659	554341	877462	462381	435791	633058	683600
O53404	Rv1056	Conserved protein	0.911325	4.25254	0.388883	0.362917	0.493512	0.782491	7276570	7899500	9255600	7753250	7278040	9780070	7419720	13608700	15385900	13995700	14480500	18366800	14683700	12384100	4597290	11578300	8725590	11306700	10950000	10881100	7763700
P9WG53	tilS	tRNA(Ile)-lysidine synthase	0.906873	0.70725	0.830371	0.442777	0.25928	0.0103529	1394740	710501	1339080	696083	5242320	1547420	1316330	2182490	4081560	1733380	2107920	3669110	2839000	3387330	2142800	2619350	1012790	1336180	1869260	2133980	1242850
P9WQG3	fadE12	Acyl-CoA dehydrogenase fadE12	0.904764	5.05475	-0.270407	0.188464	-0.210506	0.114937	2613380	2195250	2062840	2199630	1741050	2205760	1725510	3872690	5105330	4491230	4347370	2477360	3299110	2290990	1667980	1972120	1571730	2125240	1757020	1973920	1820500
P9WQE5;P9WQE7	ppsA;ppsB	Phenolphthiocerol/phthiocerol polyketide synthase subunit B	0.893476	2.30283	1.24108	2.94365	0.550118	0.49099	3745840	3207100	1850570	2863820	1325610	2108600	2113470	4977180	3415200	4316770	4933640	3535390	2339730	5361700	NA	NA	4629750	2705030	3588900	3359770	2829340
P9WKF7	mbtG	L-lysine N6-monooxygenase MbtG	0.893225	2.78803	-0.266764	0.0991068	-0.573797	0.215984	2375570	1198460	2376910	1932830	2158210	2509820	1476960	2702580	7138350	3671860	3154200	6658680	4345130	1746690	1841040	2214850	802168	1339580	1749270	1560390	855728
P9WFP5	Rv1462	UPF0051 protein Rv1462	0.893196	2.92912	-0.103196	0.02061	-0.463349	0.178087	6155640	5774510	7054080	7047570	2700530	5159050	4247830	12859000	7056400	12789700	15650200	8551550	8660130	8969620	1412390	5570120	5181650	5400390	3291000	4258100	4118410
I6XFA6	lppU	Probable lipoprotein LppU	0.890104	4.98808	-0.757951	1.08765	-0.614062	0.459207	1780330	1515770	1794110	1766250	721488	1137930	1720630	3220640	3072900	3157080	3276320	2391050	3309460	1300790	NA	413554	1017470	1745300	921963	605059	1326400
P9WKM1	Rv0966c	Uncharacterized protein Rv0966c	0.888088	0.126126	-0.990645	0.426675	0.144436	0.00949773	11163100	10733800	13331100	8619710	8763150	14282000	9713420	762843	NA	NA	38967700	NA	NA	6264550	4539080	8317190	2215200	10709400	13183100	13018700	4881300
P9WPG7	pgsA1	Phosphatidylinositol phosphate synthase	0.885408	1.52508	0.745217	1.10344	0.920001	2.15133	4615320	2904360	2981040	2335430	2727250	NA	2194940	5336790	5273980	2547580	3370910	6956850	5129220	5527450	NA	NA	3912400	4827410	5828250	7019130	4343730
O86337	lprC	Possible lipoprotein LprC	0.883944	1.92428	0.918972	1.15196	0.86589	1.01362	13409800	7458010	14911400	8421500	9128250	8234740	16822100	17453100	17977100	16237700	15546000	16069900	23845600	14653100	11333700	20526700	19865700	12258200	14667000	18604800	22344800
P95160	ndh	Type II NADH:quinone oxidoreductase Ndh	0.88288	1.05263	2.19185	6.43928	1.12214	1.44951	4569590	3385450	4062460	6529720	4469750	4299070	3055950	6723940	7002560	5791340	10114900	12871600	8852860	22610300	14578700	26602900	16673700	7463980	12878000	11251600	6192790
O53641	Rv0158	Probable transcriptional regulatory protein (Possibly TetR-family)	0.880415	4.05835	-0.164775	0.0286939	-0.307952	0.050658	2459120	2871150	3319530	3232980	812700	3155700	2113500	4370080	4638160	6191020	5932870	4101830	7638670	2272060	NA	3061220	2561260	2066400	2911580	2289660	2348900
P9WMD1	Rv1556	Uncharacterized HTH-type transcriptional regulator Rv1556	0.880406	0.664129	1.23936	0.683609	0.461388	0.00584092	2554490	2386950	3265690	2747090	1876920	4237140	4828470	2520130	7415270	2698930	2218060	7521770	17937300	2323910	8804280	8980130	4167180	1739390	3770070	3843160	3794680
Q6MX39	umaA	S-adenosylmethionine-dependent methyltransferase UmaA	0.872731	1.58682	-0.691233	0.403016	-0.257818	0.0370214	14051900	17182900	23153700	19336100	12491600	21878200	11786700	17626500	32834700	30093400	17607100	46385800	42124000	8028880	13254700	17949000	5835380	10873600	17868300	23608400	8308610
P9WQB5	ahpD	Alkyl hydroperoxide reductase AhpD	0.87134	1.02552	0.467782	0.332574	0.0645694	0.0357536	4992570	5645680	7015980	8252610	8896390	9592950	10250200	8872310	28242000	8504090	8313000	21321700	59511200	4931410	24445100	17895000	4271400	4452310	11485800	13163200	5774910
O06242	Rv2133c	Uncharacterized protein	0.861248	0.733996	0.12139	0.0131742	0.118866	0.00840981	3490280	957213	1458470	883497	2107160	1536190	1386260	1439120	4030430	1563750	1184890	3735190	6208730	763952	2221230	2269950	951766	838457	2298490	2102510	1064940
O06315	Rv0365c	Conserved protein	0.860632	3.38527	0.26028	0.150499	0.426686	1.3428	2748250	3118320	2356770	3298120	2235520	2589240	3562900	4368030	3910300	5666970	5404230	5677690	4576500	2842040	NA	NA	3741180	3302610	3469210	5332260	3918870
P9WKI7	guaB	Inosine-5'-monophosphate dehydrogenase	0.860146	2.91268	0.32257	0.344343	-1.01605	0.678916	13346300	12847600	13348400	12865200	9406550	11549800	10997500	30250500	19056000	27586500	29264600	17746600	17913300	24468300	4463320	16159400	15973900	8070990	5070560	5498570	7206900
O33260	Rv2125	Uncharacterized protein	0.859658	1.73171	0.829409	2.60768	0.686378	1.7803	2482800	2574850	2809890	3395410	2851600	2831970	3195170	5497750	2792840	4985320	5292510	NA	NA	6582180	NA	5032290	4951800	6449140	3369800	5563840	3550790
P9WKW1	Rv0476	Uncharacterized protein Rv0476	0.857045	1.33634	0.573643	0.205543	0.432229	0.0819702	6059460	6362260	5059500	5891320	3860780	6879290	6621330	10939100	12237800	8250030	10293700	11012200	48200200	9870980	7735830	8165330	9905230	7511740	5909030	9335320	8840520
P9WMB3	Rv2659c	Putative prophage phiRv2 integrase	0.855889	0.922243	0.84105	1.39056	0.483245	0.121072	2547700	4051670	3487950	3254890	4017360	3427230	3373930	4706420	9804010	4811410	5015910	7389800	11844900	3081210	15155100	9031130	3247630	4342350	5406100	5239390	2229330
P9WML7	hisC	Histidinol-phosphate aminotransferase	0.855857	4.96305	0.0350452	0.217638	-1.7742	3.46695	7164990	8116200	7665040	7933740	6047900	7886670	7158680	11250900	15745400	11999500	11297900	18542000	16262500	8431710	6491160	10042700	7275320	2199660	2400020	2068980	2282190
P9WJN7	mrp	Iron-sulfur cluster carrier protein	0.847013	2.81382	0.25006	0.426013	0.0322302	0.000585081	16859700	15674700	19616400	18467300	17426200	19159000	17517500	24479600	38560400	26284500	23019700	50873500	36735500	21956700	15477700	29779200	19708900	17371100	18750900	17099900	18455400
P9WGL9	regX3	Sensory transduction protein RegX3	0.845345	1.52704	0.285079	0.307888	0.912992	1.63479	1918480	2514810	2533080	2480020	4092110	2827750	2604790	5042130	4060210	7073580	5208810	2720930	2437810	3636830	2441770	4400230	2536170	4270130	6139200	5269180	2492060
O53664	htdX	3-hydroxyacyl-thioester dehydratase X	0.844624	1.17628	-0.102409	0.03512	0.755667	0.530887	83920500	120246000	138879000	105519000	208735000	168726000	195499000	157876000	444753000	201791000	125766000	408239000	297006000	72954700	151542000	202639000	107183000	114789000	308673000	272522000	196448000
P9WFD9	Rv2028c	Universal stress protein Rv2028c	0.834084	1.35924	-0.287944	0.0185446	0.333679	0.367636	1066710	326295	920742	NA	NA	539738	1410420	1159170	2175360	1722710	560330	1560150	1743690	1146930	NA	669159	754151	1237760	1293930	1015710	1082920
O06279	Rv3603c	Conserved hypothetical alanine and leucine rich protein	0.827907	2.3977	-1.16225	1.60525	-1.8049	1.84138	1919860	1454590	2068860	1551600	2394010	2063350	2364720	2348300	4744110	3975430	2649060	3662670	NA	921935	738203	NA	1065230	420189	760875	NA	NA
P9WK23	malQ	4-alpha-glucanotransferase	0.823628	0.593841	0.192082	0.00761259	0.00228584	0.000771409	1115360	1367960	999223	1424250	992750	1065790	369841	1964000	NA	1886290	1423630	681292	36559500	1217570	NA	1771560	313130	1067480	NA	1254010	315577
P9WPF3	pks11	Methyl-branched alkylpyrone synthesis polyketide synthase-like Pks11	0.819909	5.42545	-1.65897	3.65246	-0.573599	1.07218	2321110	3478300	2890040	3190470	2696310	3462100	3163810	5258760	7860630	5660310	4114940	6396890	5509800	906876	1096860	1217330	588024	2279510	1972260	2479540	1105630
P9WFK5	Rv0038	UPF0301 protein Rv0038	0.819184	2.03894	0.620942	1.10041	0.946605	1.79472	6716480	7242630	7420620	6447440	12072800	8267540	5798610	11669800	13888100	9794250	10496500	18380800	15892400	13466700	8809870	13906900	7999430	12511500	15406400	15419400	6234170
P9WKK7	icl	Isocitrate lyase	0.819122	3.22532	-0.818027	0.376574	-0.19516	0.00889954	10077500	8010670	7982400	9411770	5561990	7615340	4454880	23227100	12858300	15308900	18810500	10726900	10265800	9169620	2726300	5065550	3989960	10364400	6834560	7110310	5355530
P9WLM1	Rv2030c	Uncharacterized protein Rv2030c	0.816243	0.0555134	0.256943	0.464811	-0.0667001	0.0897042	1748740	1245930	2525340	NA	8520490	1858630	2609900	3022600	3711750	4007610	558988	5765410	4851640	1960640	14569300	1987430	3251170	1227170	2805250	1380650	3437730
P96257	glnH	Probable glutamine-binding lipoprotein GlnH (GLNBP)	0.806182	3.20916	-0.600123	1.11707	-0.185417	0.195915	8116090	6030680	6288750	8494810	6808360	5456200	7818360	9698300	9493310	12794000	11015900	17213400	16817600	6248090	2361750	2734830	7017170	5821780	6152690	5424790	6657880
P71626	Rv2826c	Uncharacterized protein	0.802933	3.1515	-0.471839	0.14463	0.0750593	0.102063	3177830	2709550	2994770	2662690	2792040	2764100	2375650	4748830	4895910	3902320	4085770	5934320	4982350	2293410	1684220	4068870	1692670	2130940	3692490	3734500	2088840
L7N690	amiB1	Peptidase M20 domain-containing protein 2	0.802491	3.88537	0.64294	1.57734	-0.541277	0.49284	10683300	5075990	10912800	8977660	4683140	7633770	8779780	15301000	14381400	15324800	16956700	12461800	17150900	14373500	7051870	14261600	13157800	7679540	4148280	5821180	6245090
P9WND1	folP1	Dihydropteroate synthase	0.800388	1.80672	0.514202	0.321634	0.621857	0.262173	4378390	3880360	4371330	3976040	3259200	5333480	5181860	7109340	10195300	5982990	6317310	8116610	20197500	3109000	5926870	8593860	6559430	4137020	6504880	7301640	6948800
P9WFP7	Rv1461	UPF0051 protein Rv1461	0.797511	2.5633	0.326543	0.145033	-0.542999	0.205766	6761380	7680630	7539290	7693900	4654890	6465630	5338920	12975100	7654880	11773100	17990500	10674600	11730800	10772800	2222540	8822210	8135400	7154760	4502540	4201040	4778710
I6X9X6	Rv0839	Methyltranfer_dom domain-containing protein	0.795379	3.21023	-0.450024	0.745318	-0.434007	0.656415	1075320	1392140	1578240	1434650	1184270	1724610	1224680	1733430	2803710	2653230	1870940	2178980	3196840	952568	1179530	1085610	620423	1349810	917602	610029	1143330
O69731	Rv3766	Uncharacterized protein Rv3766	0.791173	1.15301	1.00364	2.67765	0.29585	0.138172	3128920	2921700	2520720	2766310	2532510	2225740	1747430	3821690	3814780	2704770	5387410	4943230	6642910	5803860	3853710	9686480	4351770	3491140	3785030	2726720	1988280
P9WKK1	infB	Translation initiation factor IF-2	0.788813	4.0297	-0.270187	0.457306	0.331501	0.578667	28549800	26417000	29444400	29836600	18453600	23646200	22892000	47914400	43364400	51216600	62878700	35177600	37180600	26256800	10023500	27323100	17553800	34617200	34227600	32254600	24172600
P96381	Rv1019	Probable transcriptional regulatory protein (Probably TetR-family)	0.788117	0.716015	0.417302	0.193882	0.235277	0.0343686	2632640	2892150	5624200	2290810	5586180	6059210	3502620	3673790	6794050	5302730	3776530	12248600	10290800	2528490	7785430	6826500	1553490	2098190	6331910	6147910	1561390
P96202;P9WQE5	ppsB;ppsC	Phenolphthiocerol/phthiocerol polyketide synthase subunit C	0.786859	1.41839	0.556616	0.544638	0.184997	0.0882239	1295970	404913	1264670	1239670	856529	770485	1798280	1701590	2148360	3880660	2129280	2256890	1757620	2073310	453298	1573340	3895820	710669	1400260	1418290	2121320
P71790	gmdA	GDP-mannose 4,6-dehydratase	0.786024	3.37533	-0.249551	0.212658	-0.634277	0.499361	10747900	9180370	8826700	11758100	4398610	9172190	7697100	18254000	13007900	17034100	17001900	12225100	14629600	12001600	3139050	8381790	7048740	8256140	5841760	5976860	4977630
P71650	mazF9	Endoribonuclease MazF9	0.779183	0.380031	0.805535	0.466461	0.562133	0.241917	2404160	4015100	6046370	4479130	6211590	6501700	3540250	2509380	10340400	5033400	3849030	11690300	18722300	2505490	13401200	13151700	1216520	2423230	10803200	12888500	2076140
P9WPT5	ctpC	Manganese-exporting P-type ATPase	0.778528	3.4403	-0.456656	1.64231	0.322413	0.34004	14890200	11969100	10854500	18663700	4604060	11180000	9573700	18195500	16247400	19162000	22613300	20113700	19193900	8876760	3672030	7416380	9081960	14291700	13830200	14129200	11322100
L7N692	Rv1489	Conserved protein	0.777873	0.546587	0.492779	0.500138	0.341043	0.167495	24194500	31774100	39606500	29954200	46972100	42119500	34235900	22725900	78700400	38701400	27625200	88677300	89839800	33142600	63207700	77356900	21575200	23792000	56290500	65028400	30440800
P9WQ67	Rv3778c	Uncharacterized protein Rv3778c	0.773946	1.33506	-0.477796	0.430103	-0.116879	0.189719	19388700	19148700	26818100	16571200	24314300	27433900	20168400	22724200	45550100	28921300	17381400	63888400	40052200	11374900	15602300	21528400	13362500	13395000	19652000	19117200	18080600
P71791	epiA	GDP-L-fucose synthase	0.773048	2.07609	0.224145	0.485306	0.463046	0.5512	10870500	11598000	12283400	10194400	9864590	13639800	13374000	15192500	25068300	14642000	11998600	24446600	27035700	11140500	15387900	18891400	11707000	11628200	17694900	17645700	14328800
I6YEN3	Rv2893	Possible oxidoreductase	0.77143	1.37053	0.355895	0.25983	0.437278	0.290361	2025700	2819960	3604870	2273840	4164270	3109670	4433830	3267390	6388820	4227350	3296020	8479410	7121940	2591270	4661420	4662450	3297960	2869970	4412130	5081170	4009150
P9WQN3	ftsH	ATP-dependent zinc metalloprotease FtsH	0.768888	1.93402	0.691405	0.623659	0.384424	0.472986	9494270	8574200	8209250	10500300	5430810	7519150	7896750	18610300	11025100	14580000	25148600	10469400	13396400	18532300	3834000	13367300	13146200	15680000	10952700	10479000	9923140
P9WMK5	hsaF	4-hydroxy-2-oxohexanoate aldolase	0.763591	3.34103	-0.211337	0.608019	-0.354174	0.278121	4489620	4407890	4598220	4353150	3178550	4308200	3726130	9178300	6158390	8653100	8622390	4080440	5946720	3787930	1219900	3732020	4011200	3382480	3051840	3428610	3816870
P9WNA5	eccC5	ESX-5 secretion system protein EccC5	0.762014	2.36939	0.478295	0.442034	0.0229934	0.189719	26708100	24862400	22277600	27680600	10202900	20391600	17027000	43796400	27579300	39520200	63483100	31383200	36039000	38881300	11979200	32164800	29904900	35700200	20990500	23711000	21560000
O06800	Rv1767	Conserved protein	0.75387	0.421992	0.981939	0.890789	0.0113096	0.0359863	3025430	4126430	3507300	2869140	8424490	5588910	3998090	3933150	9207740	2692900	4276300	9284300	21196200	4290100	19189300	11503300	1598540	2969270	5207430	5089840	627068
P9WFI7;P9WFJ3;P9WFH5	Rv0146;Rv0726c;Rv3767c	Putative S-adenosyl-L-methionine-dependent methyltransferase Rv3767c	0.752722	3.26168	0.547993	1.81573	-1.40549	2.43954	4191950	4036880	4849830	4147810	4415760	3431590	4512320	7454480	7117830	7050260	5924600	6576420	7076350	7227670	5030010	7693420	2950740	1582420	1672470	NA	1110230
P9WJ95	iniC	Isoniazid-induced protein IniC	0.752721	1.5085	-0.049856	0.0416373	0.203072	0.0937138	4583830	4875450	5001290	5439120	7281000	6002480	3806800	6083860	12193500	6913720	5615570	13409300	9940300	3921380	5741440	8037360	3319750	4323080	7191360	7565710	3388310
P9WKT9	Rv0499	Uncharacterized protein Rv0499	0.748722	0.948362	-0.300435	0.371678	-0.167155	0.188869	1321350	1343430	1257500	1233300	1858960	1644070	1398520	1330560	2296140	1741360	2257370	2627400	NA	1264340	454145	1911600	917411	1347770	1298340	1094570	1080950
P96202	ppsC	Phenolphthiocerol/phthiocerol polyketide synthase subunit C	0.747234	1.90099	0.387782	0.561366	0.134903	0.0876114	4981320	5073530	5469210	5778080	3613400	5017360	3680220	8305470	5965850	8538530	8837270	8695930	6737680	9843140	2245100	6537870	6591360	5474520	5616220	5543790	3776360
O06232	Rv2143	Pribosyltran domain-containing protein	0.742736	0.887334	1.33815	1.90725	0.00164046	0.0357536	254476	240363	520667	351138	563040	550561	301877	466863	697794	438088	477357	1145420	1155030	567799	1272280	1207740	344100	274900	428175	461898	213949
O53872	fadB	3-hydroxyacyl-CoA dehydrogenase	0.739078	3.46959	-0.581638	0.492866	-0.306233	0.0583859	64520800	56070700	55782700	70522900	22126500	50103200	38781600	105109000	76108300	106239000	124127000	78505900	81105800	60764500	14400100	43725100	30823400	61736300	43860500	46368100	29810100
P9WPV7	atpB	ATP synthase subunit a	0.738288	1.28887	-0.703784	0.534581	-0.399312	0.189719	2713040	2821840	2816130	6148830	722459	3032490	1151780	2810740	3231060	5273920	6266410	4121790	7831560	1980870	945023	2209330	1477110	2396520	1909130	2361360	1306040
P9WQ43;P9WQ45	fadD25;fadD26	Long-chain-fatty-acid--AMP ligase FadD26	0.736635	1.21595	0.864337	1.45928	0.349991	0.290063	1722430	1703360	1842770	1593230	2111450	1793460	1874060	2492550	2606830	3641860	2256110	3370000	3788840	1901330	NA	3265000	6222280	2083410	2488310	2911700	1672460
O53193	Rv2466c	Thioredoxin-like reductase Rv2466c	0.728016	1.53063	0.0290865	0.151575	0.176411	0.0172612	9604290	11222500	10765600	11671500	18805300	17512000	14290100	18217700	24856600	20446700	14876000	16756900	49012900	10600000	8721800	13218400	14466700	11254800	14784600	12520100	13859100
P9WI95	phoU2	Phosphate-specific transport system accessory protein PhoU homolog 2	0.7268	1.1768	0.113447	0.111573	-1.16751	0.329338	7269200	9537000	13696800	6251430	10856400	12425600	14056100	12970200	29251000	11340500	10486800	22963700	49663200	3951120	18413300	19542600	5075830	2234640	5795690	6110360	3870630
O07721	fadB5	Possible oxidoreductase FadB5	0.718271	1.72964	0.505765	0.589042	1.4671	7.00988	7705550	7609850	7767980	7931020	9146400	8531910	7493450	10625100	13723500	8443480	11836400	17999100	13929200	13086600	5862340	12197000	9862130	25872300	21757200	21194300	18412900
O07783	vapC4	Ribonuclease VapC4	0.715004	0.607092	0.122705	0.0875367	0.0508136	0.0769655	766078	1040510	1399860	811168	1086240	1343860	1614060	793404	2281150	1284950	623993	3062950	3076740	NA	969043	1696180	1182670	409863	1457830	890151	1360210
P9WH73;P9WH71	nrdF1;nrdF2	Ribonucleoside-diphosphate reductase subunit beta nrdF2	0.712006	0.934142	-1.19959	0.504953	-1.16658	0.381507	2451180	2365890	5457040	3620260	705119	2700080	955005	4015230	NA	5024890	4821720	3723280	2821930	NA	NA	1864020	270469	1131790	1052100	3363800	211904
P9WGK3	devS	Oxygen sensor histidine kinase response regulator DevS/DosS	0.70114	1.29254	-0.108688	0.00396355	-0.455083	0.606583	2340740	2831090	3568380	2401750	2435440	3658500	3218760	2891120	5054300	4151210	2391360	6923920	5213720	2497040	2601880	3852010	2649400	1473080	2399160	1843110	2287270
P96845	fadE32	Probable acyl-CoA dehydrogenase FadE32	0.699748	1.7292	0.42159	0.318159	0.855205	0.860206	1021770	1188420	1297570	879339	440338	984823	971310	1288530	2521200	1434830	1388310	1764310	4713230	1214970	1384500	1448130	1253650	1866590	1696530	1633190	2033290
P9WLW7	Rv1502	Uncharacterized protein Rv1502	0.698481	2.22608	-1.15684	1.53947	0.741484	1.08862	2693760	4224390	3260840	2385060	2335540	2544610	1666270	5876540	3367150	4891610	6259960	2877750	3108290	1806270	592454	1208220	1074260	4501230	4271390	4237250	2482860
I6Y8Z3	Rv0870c	Possible conserved integral membrane protein	0.697219	1.75945	-0.00680113	0.011745	-0.525703	0.200205	1158180	1123310	916990	1058610	NA	999610	649989	1851220	1378140	1763960	2836180	652927	1573190	791631	NA	1024270	1378450	1101830	574454	588955	840727
O86335	pks6	Probable membrane bound polyketide synthase Pks6	0.693259	1.543	-0.0738921	0.0776479	-0.0370628	0.0411491	2662770	1995050	2247400	2410570	793973	1941100	1343420	4768440	2277880	4173840	4784130	1429700	1627470	2480690	897061	1571140	2219740	2393340	1732290	1003840	2156610
O53871	fadA	Putative acyltransferase Rv0859	0.690926	2.34483	-0.264819	0.599504	-0.134489	0.0470506	66285400	54427200	60658600	65607800	32746400	54797300	56694800	102280000	80767000	121964000	107099000	49068900	70840900	57556300	14395500	49620600	44753900	59372300	50134000	53163100	46134900
P9WGC7	sucD	Succinate--CoA ligase [ADP-forming] subunit alpha	0.685901	2.81801	-0.312328	0.33954	0.182459	0.0921998	99989900	95616700	90104300	95397800	85369600	114285000	92129000	140512000	205623000	139390000	108704000	199746000	166422000	97689400	55966100	107511000	43005000	120997000	108933000	107585000	51304800
P9WLR5	Rv1829	Uncharacterized protein Rv1829	0.684345	1.89548	0.387208	0.615471	0.584273	0.854735	13404000	13458700	15302300	13891600	8866720	15445700	5407600	29997900	14838100	22495300	25605500	12280500	20760200	20826200	14378000	21661000	7186330	18485400	21871400	23495600	6935620
O50433	fdxC	Ferredoxin	0.683709	0.0410615	0.456909	0.164227	0.330581	0.0429678	2527590	8627840	3638170	2905040	980851	4077130	7364690	2308780	8288220	5843860	2075580	NA	6616190	2759600	8467500	3737610	6249880	1226110	4047230	5102910	6626750
P71875	kshA	3-ketosteroid-9-alpha-monooxygenase, oxygenase component	0.683683	1.50622	0.365755	1.16688	-0.741898	0.156419	2381130	2211800	2069680	2168070	972116	1674050	2726640	3482430	1971960	3853330	4538600	2650350	NA	2569170	NA	4134590	2793680	NA	2124800	NA	468005
P9WIJ5	pcp	Pyrrolidone-carboxylate peptidase	0.675176	0.987239	0.897871	0.223252	0.781683	0.10597	1591110	1663010	1816780	1595680	1645830	1880050	2709940	2195430	5672420	2712760	1804170	2598200	13747400	1822740	3214050	2983370	3746830	1441780	2706250	3011630	3784530
P9WKN1	Rv0959	Uncharacterized protein Rv0959	0.672273	2.15168	0.804711	2.17758	-0.404877	0.477544	3971280	1233440	1469690	1889310	2007290	1834170	1146250	3012590	2797370	2537060	3878580	2833210	3125620	3203580	NA	3222360	3203920	1470100	1653990	1300600	1223920
O33179	Rv1776c	Possible transcriptional regulatory protein	0.668889	0.707048	0.456735	0.30924	0.263728	0.0393406	497910	509385	1083650	394216	NA	779957	731065	624405	1264580	707547	644190	1919950	1981880	300608	1430290	1364600	337834	716850	920043	772406	320156
P9WIK9	papA1	2'-acyl-2-O-sulfo-trehalose (hydroxy)phthioceranyltransferase PapA1	0.665624	1.82049	-0.315674	0.584626	-1.40542	1.81067	6238070	5083510	4984550	5441600	2541100	4550520	4406110	8893660	7650770	8651340	8162760	3672470	5793890	5420230	1149680	2951860	5058070	2585310	1594390	1034660	2169020
P9WQ43	fadD26	Long-chain-fatty-acid--AMP ligase FadD26	0.664087	2.81382	-0.459707	0.235324	0.819315	3.90856	2733520	3763000	3678960	3756030	2866410	3609960	2401140	5682010	4956960	6006260	6419020	5758420	3739670	2945900	2120560	3696970	2303950	5417690	7405830	7322350	3961490
O53667	Rv0245	Possible oxidoreductase	0.662749	0.5866	0.302843	0.359147	-0.47828	0.129155	4931230	7897850	10095500	4678390	14372400	9578790	13033700	7716730	25286100	11840800	6426300	18487500	19405400	5415170	18217100	19022200	3730920	4845870	9117160	8906070	3743000
P96261	thiO	Possible thiamine biosynthesis oxidoreductase ThiO	0.662555	2.78613	0.155525	0.0137616	0.389134	0.718107	4107810	3047070	3557660	3236650	3946990	3322360	2784280	5553340	4590030	4964480	4414090	6063780	6164510	4903880	1605430	3321840	4079230	4317240	4384730	4166610	4693420
P9WH69	nrdB	R2-like ligand binding oxidase	0.65918	1.48579	0.233897	0.368959	-0.858773	0.656817	2694730	2787110	2541460	2693290	NA	2866380	2147790	4337860	3791840	5583950	5770690	942654	4170820	3184880	2249780	4361050	3151470	2093770	1131760	1461800	1509270
P9WQ59;P9WQ47	fadD23;fadD28	Long-chain-fatty-acid--AMP ligase FadD23	0.652024	1.52149	0.0241469	0.200351	-0.131398	0.0579797	7509100	8539290	11771100	10140200	2207990	7714090	5664830	13081600	11955400	12151400	16929100	12092000	10708100	10669400	5019180	14642500	2429780	9538960	5938500	8146600	1432780
P9WG39	ilvG	Acetolactate synthase large subunit IlvG	0.651408	3.48475	-0.0469169	0.113112	-0.715131	1.36428	15418900	14704400	18168800	14487900	13963200	15036100	11184900	21906600	28477400	21959600	19209400	31228400	24232800	17648300	10715100	20776500	10819500	10897900	8671780	9242580	6324520
P9WN81	glpD1	Glycerol-3-phosphate dehydrogenase 1	0.646698	2.37135	0.488382	0.745643	0.867862	3.02679	3822930	2584100	3332160	3621970	2485370	4557950	2629260	4372070	5828320	4673100	4797760	8802280	5635770	5340920	3213630	4008260	5393840	6429060	6980930	5436190	5733030
P9WNP1	echA6	Probable enoyl-CoA hydratase echA6	0.644528	1.29878	0.220713	0.182319	0.175815	0.0573003	30870700	37318000	37246300	36027300	38213800	45474400	42745300	44714800	83524000	42066000	41148800	71958300	156359000	35195400	51778600	60440900	31579100	32956700	46984700	51173900	37324300
O05317	Rv1216c	Probable conserved integral membrane protein	0.643908	2.22473	-0.6493	0.622186	-0.492682	0.465317	2203870	2411740	1583470	2483790	833976	1827690	NA	2565390	2617300	3818450	4294150	2255720	3682240	1049260	NA	NA	1521220	1066700	1434080	1565240	1431160
P71922	Rv2426c	AAA domain-containing protein	0.643554	1.441	0.835359	1.17717	1.06477	1.1142	5566780	6394820	6730980	5555130	7053100	6739090	7965910	10461100	16544800	8029890	8062150	10568800	28063100	8255290	14806900	16653200	9213290	8153730	14261500	16145400	13898700
P9WFC7	uvrB	UvrABC system protein B	0.640824	3.34103	0.940735	3.3324	-1.25979	1.31726	3216530	2712960	2853810	3296910	1652060	2999950	2074690	5663740	4273680	4391970	6053650	4507460	4357810	6252810	3197190	5972700	4983110	1792910	1148740	1031430	1234790
L7N6B1	Rv1322A	Conserved protein	0.638525	1.06447	0.000458186	0.00474551	-0.60961	0.365545	6569580	10533600	14113800	8986730	17375300	15538300	11506700	12025800	22889300	10562300	12936500	30785400	35237900	6568050	14918100	17129600	8102610	3874580	10344300	8161140	6921240
P9WL75	yajC	Sec translocon accessory complex subunit YajC	0.636993	1.47497	0.694862	1.66641	0.66033	1.18405	9315280	8596780	6411610	5921300	3859720	6311740	6054830	10107700	11984000	8324370	9522880	5102460	13248000	12197900	NA	10217000	8100570	11967300	9552210	7452900	10398500
P9WK59	lpqT	Putative lipoprotein LpqT	0.635812	0.5866	-0.946687	0.2584	-0.554225	0.102809	520152	953457	1014600	905090	627936	1216500	562159	296182	1062820	1427420	1426940	1385740	2855310	445624	NA	697215	469581	936247	981443	254683	296527
P71540	echA7	Probable enoyl-CoA hydratase EchA7 (Enoyl hydrase) (Unsaturated acyl-CoA hydratase) (Crotonase)	0.632084	1.7292	0.785813	0.882691	-0.0176661	0.0227726	1049320	1142510	1226520	1192830	921255	1172450	982369	2472750	1024220	2242700	2030120	1095460	1511210	1969760	NA	1089450	2079040	1426080	1130550	592736	1126660
P9WLN1	Rv2005c	Universal stress protein Rv2005c	0.631437	1.47497	-0.0246669	0.152385	0.496725	0.785032	13366800	16615300	19454300	9615750	9858480	13940000	8738940	16494300	22242800	19170400	13809200	28872500	25688100	15869400	10411000	20788700	8559500	15643800	22077500	22807500	10696300
P9WQ81	bioA	Adenosylmethionine-8-amino-7-oxononanoate aminotransferase	0.630407	3.4403	0.0439524	0.020151	0.234336	0.270664	2305470	1243510	1774530	1569130	797941	1283050	1977250	2987010	2525860	2332170	2239530	2322200	3270460	1548750	NA	NA	1686590	2087220	1583530	1604520	2134030
P9WNH5	hsaD	4,5:9,10-diseco-3-hydroxy-5,9,17-trioxoandrosta-1(10),2-diene-4-oate hydrolase	0.630045	1.05301	-0.267297	0.438653	0.244335	0.00949773	9614060	10652600	11889700	9786110	10024700	13759900	17437200	12065300	24852200	15580500	10167900	26223400	17391700	6492590	9753350	10975100	7948600	5986490	15550500	13665900	11571100
P9WGR7	Rv0945	Uncharacterized oxidoreductase Rv0945	0.625998	0.913995	0.530205	0.850731	1.02681	1.72573	2185120	2455070	2467950	2329080	1669190	3080150	2752200	6512240	NA	NA	NA	1065470	NA	2858210	4232690	6296430	2643690	4427610	7559450	5576880	3405010
P9WLD9	Rv2297	Uncharacterized protein Rv2297	0.621711	0.240462	-0.143572	0.558673	0.730242	0.866864	3867590	3842830	6625740	4257750	3811640	5625730	6210400	3005680	8054090	5792510	3379740	8292660	7310280	3442150	2814180	4266720	4395560	5214070	7565070	7639190	6561440
I6XVW9	atsD	Possible arylsulfatase AtsD (Aryl-sulfate sulphohydrolase) (Arylsulphatase)	0.621562	0.00761518	0.989414	0.153532	-0.0531789	0.204107	7160460	1291250	1288590	2132960	412028	1728750	934341	2105590	NA	1867690	3272370	1165990	NA	3832460	1190170	3122730	2004510	1244520	NA	1602290	758392
O06213	Rv2164c	Probable conserved proline rich membrane protein	0.619818	0.409068	2.24019	1.30354	1.80072	0.433567	4236310	8627280	5160360	5798400	3086390	6896300	6974150	NA	61707600	2130290	4323090	8910290	11596000	5963080	51419200	48827000	3512950	10908200	24996700	27095600	15405800
I6X552	Rv2698	Probable conserved alanine rich transmembrane protein	0.619625	0.639281	0.737135	0.69881	0.371729	0.337615	2617270	2594890	1840680	2574800	587717	1762950	1677180	3134100	1786730	2455520	3005970	2828160	NA	3650050	NA	1968460	3068160	4102410	1789820	1638730	2973500
P9WJC5	espI	ESX-1 secretion-associated protein EspI	0.617961	2.36388	-0.0134869	0.0112915	0.355949	0.337742	15582600	13538800	12976600	17448500	8411580	12507400	9926230	24159300	19110800	20719700	27298500	16669500	17726000	17917800	6611530	16698700	9013010	18432400	15775000	17440600	8086820
P9WHH1	trxB	Thioredoxin reductase	0.614644	1.51899	0.287802	0.0502582	-0.786859	0.891225	21582900	23196400	24071400	20930700	18573000	21368800	23836600	39854400	30228700	47237800	35865900	17517000	22500100	31477600	8708760	27276700	25419200	15169700	10658600	11199600	13819500
O06393	ccsA	Possible cytochrome C-type biogenesis protein CcsA	0.613971	0.148193	0.907598	0.992588	0.951061	0.912131	1059840	1042670	982148	1836040	NA	1143270	489230	762572	NA	2029880	1211780	2006040	NA	1972070	NA	2778130	1301220	2782630	876548	3136890	1282140
P9WMM3	hisF	Imidazole glycerol phosphate synthase subunit HisF	0.613158	2.38915	-0.0431023	0.00158351	0.207531	0.353307	5898180	5701650	6107270	5468290	6417280	5887170	5290970	8012840	9997230	7711110	7735100	10351500	16874800	5404320	4006060	7983620	6023450	6906670	6689280	8520310	6619600
P71792;I6Y242	Rv1513;Rv2956	Conserved protein	0.613123	0.664287	0.44454	0.342066	-0.483158	0.0522102	5912670	11138500	10810700	8311440	14695800	3749770	8073740	11018000	18455100	9964150	8803200	19168500	14407800	6195840	16425900	17051600	3573220	6289630	15288500	3844030	5602540
O53728	Rv0443	Conserved protein	0.608534	0.702945	0.667678	0.665985	0.0315144	0.0258614	10357200	16649700	17914700	12050600	14562200	18180200	22082300	15594600	52908400	18951500	12260000	31820400	59653300	7796740	48098900	44146600	8749970	8009630	24435800	22740600	11294200
I6Y9E8	Rv2475c	Conserved protein	0.607788	2.17548	0.0270059	0.0575985	-0.00625226	0.15159	5644770	6289750	2956120	8137930	2405660	6776940	2620120	6794350	8140100	8886300	8318060	13098900	10867600	5868350	1245250	5634510	7224270	5269260	6669240	5971460	5237040
P9WJC7	espG3	ESX-3 secretion-associated protein EspG3	0.607445	1.95472	-0.0952325	0.298524	-1.43133	2.09608	1894910	2578210	2531520	2942680	2258980	2598500	2275770	2643950	3887680	3609600	3826160	4490450	4720540	2864930	1874690	4175930	1846380	768127	1175850	1076000	801316
Q7ARS9	Rv0385	Flavohemoglobin	0.607404	1.20368	-0.571027	0.0656343	0.0203737	0.146229	1786300	1600240	1881190	1877810	1038160	1836060	1312640	1616610	3003370	2490360	1582830	2952550	3076130	1340220	1064630	2511220	868003	1910660	1712750	2203220	1285380
P9WFM3	Rv1101c	Putative transport protein Rv1101c	0.605069	1.6963	-0.371663	0.42841	-0.227172	0.0614866	1999670	1769060	1788260	3204830	800999	1870750	1212560	2665710	2447150	3294820	5515910	2042220	2774360	1382130	NA	859446	1687780	2026190	1477510	1577940	1342620
P9WQA3	fba	Fructose-bisphosphate aldolase	0.60453	3.62225	-0.0714814	0.251039	0.225526	0.785032	70071300	65901300	64170300	70116300	43377500	67307100	64170700	91265700	113076000	109138000	89750100	72672900	112330000	65981400	36453200	70560600	59449900	80640600	81396400	73463500	71985500
O06404	Rv0538	Possible conserved membrane protein	0.602313	0.336258	0.848372	0.607971	0.637239	0.216366	2226640	1990380	2889670	2959820	1220740	2913640	2220500	3380370	2874270	4283190	3558250	NA	803211	4985730	1315090	3292090	4725900	4133220	1370470	3203110	3723300
L7N677	oxyS	Oxidative stress response regulatory protein OxyS	0.602126	1.09964	-0.128209	0.00396355	0.509411	0.723434	2991890	3947150	4138730	3779660	3197450	4155500	4534940	3591760	8331840	4642430	2993500	7340740	8226840	3262330	3960690	4754170	2672790	3905770	6149130	6262430	5088160
O53448	Rv1100	Conserved protein	0.601684	1.07721	0.900402	1.15815	0.962782	1.90721	4369590	6042220	4103560	4300220	3815850	4033190	5554920	6461070	5991100	7623320	6589980	7173300	5970320	8927280	2777620	7126180	10137200	8592720	8428070	6502660	8334740
I6X5C9	ribF	Riboflavin biosynthesis protein	0.598702	1.2965	0.456476	0.200351	0.353708	0.135773	1826570	1534500	2187090	1668240	1037730	2115320	1555100	1997350	2526400	2811120	2042380	3790570	2526210	2204740	848465	2373530	2756590	1241640	1999010	2264480	2554540
O50434	Rv1178	Aminotransferase	0.597364	1.86154	-0.0388285	0.160134	0.25993	0.203786	6632110	5777370	8884070	6700460	5843490	6965010	5627920	7658130	9763700	10304400	8353050	14187000	11796100	8553090	2609260	6699610	6212380	8617300	6235570	7833500	8049350
P9WQE7	ppsA	Phenolphthiocerol/phthiocerol polyketide synthase subunit A	0.595715	1.81898	0.328274	0.435463	0.284573	0.335123	5647290	5157800	5102710	5861630	2979790	4481030	3627780	8646640	7040060	8068130	9036100	7354520	6598430	9795520	1657630	6284610	6528400	6360590	6493860	6070120	4422030
P9WIL3	panD	Aspartate 1-decarboxylase	0.595295	1.70093	-0.0295051	0.0197976	-0.453612	0.612507	1278690	1363860	1803110	898057	1798400	1624220	1383890	2135660	1853860	1220640	2172620	2045850	3222080	1548100	NA	NA	1163650	1261340	939487	1081580	746349
O33229	fadE20	Probable acyl-CoA dehydrogenase FadE20	0.591738	2.40709	-0.646091	0.839355	-0.806581	0.816944	5336680	5281810	5022650	5940180	1673550	4484530	3375950	8109800	7029080	9639340	9305890	4416950	4451840	3567910	2089900	2993100	3425940	3336150	2517030	2329760	3226220
I6X7D4	Rv3463	Conserved protein	0.590301	1.29035	-0.335468	0.196211	0.019376	0.00949773	9368220	11062300	10652900	12526300	14179800	13541800	11562400	12193300	24039400	15427500	10165200	24503800	19388300	9081200	9245830	14454700	7232720	9834170	13603300	14553000	8013440
P9WGR5	Rv0484c	Uncharacterized oxidoreductase Rv0484c	0.590031	0.91489	-0.492223	0.273197	-0.0587984	0.0194509	10547300	13740000	20518800	10898500	14635400	19731300	14633200	13998600	29744200	19074500	12107000	43060500	24979600	7767220	15530800	13039100	7621190	7486080	20374700	17423100	10674500
O06216	Rv2161c	Conserved protein	0.589132	2.42596	-1.05508	2.49356	-1.8556	3.90129	39429200	36236500	42696600	36369200	30030900	33569600	36471800	52313400	70460500	57110000	36714400	33007600	67333700	23511600	14871000	18847500	16159400	15684900	8426900	9872110	10226800
P9WJD9	espB	ESX-1 secretion-associated protein EspB	0.589126	0.874361	0.575781	0.519341	-0.601567	0.424678	17462200	15290700	17939700	20706400	10844500	17691000	20487100	31775600	21450800	38552800	32246300	3939080	16467900	29737300	13092100	22999000	30716400	14782900	7544260	8653870	14664200
P9WIR1	cfp6	Low molecular weight protein antigen 6	0.58908	0.571962	-0.405772	0.0388043	0.160343	0.243198	1636810	2509810	2559230	2647300	855648	3603330	2355550	1470620	3887250	3663700	2621600	4370940	4922450	1430720	2358250	4042410	1347120	1980860	3831070	3628830	1941800
P9WII9	pdxS	Pyridoxal 5'-phosphate synthase subunit PdxS	0.588198	1.10112	0.425219	0.392922	0.320861	0.170758	44673400	58592200	58988100	45665100	83333600	67971100	63360600	75773600	147473000	64405700	51169400	101588000	196317000	54724600	112087000	103691000	36161200	54256800	95384900	93104400	47525900
P9WNN9	echA8	Probable enoyl-CoA hydratase echA8	0.587468	2.04	-0.242833	0.64225	-0.310236	0.347813	53882200	42708900	56988400	46150700	83789400	66676400	63692800	71931200	90740900	80521500	66226300	144184000	135201000	50444500	22825100	45875500	54859200	40059400	48810900	45924700	45998700
I6Y293	lppZ	Probable conserved lipoprotein LppZ	0.582844	1.35361	0.807497	0.98062	0.136857	0.146428	8057290	7521300	8674160	8466600	4581610	6741870	9054530	12044500	12069200	14850700	14230600	7881400	12067200	15603200	3610090	12600100	16902200	9564970	8153130	7560740	12070400
P9WJL7	murC	UDP-N-acetylmuramate--L-alanine ligase	0.580933	1.42338	-0.39135	1.45831	-0.0468433	0.285041	7493130	5622700	6961080	7263560	5601200	5624640	5514400	8674040	6522210	9561480	9366810	8152820	6912980	6712920	1576960	4081010	4495620	6373320	4477840	5330410	5559480
P9WPA7	coaA	Pantothenate kinase	0.580433	1.28887	-0.205134	0.0336332	0.464885	0.432253	2828310	4009390	3389940	3939180	3136880	4475720	2206410	3653610	6062380	4075560	3785860	9396650	8524700	2582870	3298390	4654640	1857820	4111220	6236490	5246420	2094970
I6XHH5	hsaE	Probable hydratase	0.579591	0.375934	-0.16416	0.54182	0.0228016	0.10389	4229800	4019070	4240680	4109740	8929730	3140910	3859780	6312840	3998110	6816050	6141700	3378680	NA	4247580	NA	2496840	3667730	5024070	4052560	3502780	4297860
P9WQ79	gabT	4-aminobutyrate aminotransferase	0.578463	2.59779	0.0706508	0.00875225	-0.191134	0.173962	10142400	10115500	9853320	9580330	8904490	8710300	7511480	13755600	19993800	14856200	11662200	16525600	10253300	10982200	5322470	9140140	13439100	9323950	7693080	6984950	9090070
P9WPV5	atpF	ATP synthase subunit b	0.575001	1.50567	-0.297256	0.180554	-0.0736613	0.00561821	46763600	53891700	47827000	49302300	52894400	67452700	53568500	81663300	74814500	75928000	86932600	52209400	207365000	45944700	24169900	60648100	40146100	59434500	52680100	47842900	47167200
P9WMW9	gpgS	Glucosyl-3-phosphoglycerate synthase	0.574302	0.419182	0.68809	1.19983	0.129542	0.0146075	1347880	1137350	597936	1463650	2630850	1046920	991228	1438650	1859450	1581280	1428840	1805650	2512160	1832440	NA	3165430	1444530	NA	NA	NA	1244200
P9WF67	vapC35	Ribonuclease VapC35	0.572899	0.939145	-0.595914	0.20656	-0.872056	0.179759	1909880	3114430	2590750	2194430	3006630	2607020	1623470	2497810	5209720	2003760	1274780	6710680	9560090	1207700	2220510	2414350	651124	869394	2489700	1961610	802436
P95185	fadB4	Probable NADPH quinone oxidoreductase FadB4 (NADPH:quinone reductase) (Zeta-crystallin)	0.572639	2.46896	-0.217308	0.0117353	0.0592554	0.100908	11757100	9094320	12988600	12224300	8214080	11883600	7861120	13767100	17687400	17283900	15994300	32235300	25081600	11838400	6405700	15130300	8387780	12357500	12895900	12142600	8344510
P9WFQ5	Rv2851c	UPF0039 protein Rv2851c	0.572424	0.654841	0.361054	0.0362124	0.0668321	0.0146075	1462990	1321650	1371840	1001210	587763	1086290	1467920	2033660	21921800	1681970	2112490	1191700	1896980	1446160	NA	1796740	1697480	1483910	1284720	1195260	2009070
P9WQ59;P9WQ47;P9WQ45;O53903	fadD23;fadD25;fadD28	Putative fatty-acid--CoA ligase fadD25	0.56918	1.4953	-1.02911	0.210793	-1.08996	0.485094	NA	12946200	12303800	14000100	2216580	9110520	4520720	NA	13706300	17027500	27971500	15886000	9719640	4996730	5496520	12698700	4332840	6758960	4704700	5355220	1532890
P9WJM7	mshD	Mycothiol acetyltransferase	0.569099	1.43904	-0.375823	0.347533	0.356105	0.49284	5450280	5415350	6356570	6454070	7959310	8685560	8376210	7975130	12861400	9076470	7052860	15249400	10074000	5613480	4192000	7977400	4334380	7222440	11193300	9299530	6520840
O05458	mycP2	Mycosin-2	0.568709	1.7348	-0.148218	0.0543386	-0.396853	0.0521692	2988880	1607130	3046320	3394510	1315780	3350960	3699100	4518290	NA	5617030	4049490	10044500	2823640	3147990	1413230	2349790	4185240	2240560	2117300	2386880	4099020
P9WFN1	Rv2140c	UPF0098 protein Rv2140c	0.568674	1.38717	-0.700613	0.475493	-0.391242	0.207674	116894000	91473400	198334000	74021000	142788000	163195000	91306400	153066000	193545000	153200000	118404000	338358000	283210000	77697200	66155100	137151000	48852600	76759000	101498000	126926000	74764500
P9WGQ5	Rv0927c	Uncharacterized oxidoreductase Rv0927c	0.56721	0.728276	0.212682	0.13424	0.519544	0.157434	7048260	8351820	11306700	6499340	8216290	8572920	14413500	9088540	17210900	7595150	7359840	15660500	25156600	8110750	13312400	11246100	7358780	7463370	10644900	13299800	14328800
P96808	fadE1	Probable acyl-CoA dehydrogenase FadE1	0.566638	1.69318	-0.04553	0.027517	-0.45789	0.103627	12436200	10833800	11854100	12722800	5148870	10187000	7910170	17437400	14013700	16852500	19596200	15238700	11763100	16760000	3413880	11740400	9254070	12368500	7445100	8330000	6758030
P9WLQ7	Rv1841c	Uncharacterized protein Rv1841c	0.564928	0.661286	0.196828	0.0321771	0.0532818	0.0578433	2006270	1374920	2217410	1844650	1503130	1621100	1533630	2138660	2335010	1093980	2514160	4099680	2461220	2124980	1591150	878330	3396600	1890280	1473900	1410140	3626610
I6X548	Rv2693c	Probable conserved integral membrane alanine and leucine rich protein	0.562165	1.14741	-0.666103	0.368519	0.203601	0.0882239	1569880	1854230	1393860	2167150	601127	1703810	NA	1896740	3650320	3069600	2936810	1687440	1706850	1740640	611141	1451960	260774	2113310	1981290	1788590	419354
P9WLP7	mbcA	Mycobacterial cidal antitoxin MbcA	0.558252	0.57327	-0.151153	0.0239934	-0.364824	0.163018	6494070	12424400	13461100	7202710	24795200	14985200	18061700	11236500	39132200	15542800	7035460	24099700	39616400	4705070	25712300	16778300	7465960	4770760	13629700	11062200	9844600
P9WFA5	vapC11	Ribonuclease VapC11	0.558219	0.453385	0.696031	0.258005	0.637961	0.0429678	1582910	2602790	2713670	1631110	4837950	3300370	4633880	1952390	7928090	1849710	1666310	6039100	12799100	1234370	6777890	5653430	3139090	1238240	3824450	4740450	4621190
I6XG43	Rv3079c	Conserved protein	0.558186	1.92428	-0.0395003	0.355518	0.642317	1.54918	4384170	4372100	5767490	4489470	5657030	5520730	4711550	5721690	7567590	6307140	5251320	8310700	10618100	5088900	3000040	4592340	4576260	6044260	7452230	7255660	7677460
P71538	accA2	Biotin carboxylase	0.558043	2.03265	-0.289224	0.209648	-0.188993	0.0146075	1715890	1787950	1544230	1671090	1110590	1604060	1182990	3074010	1901530	3034700	2821690	1689970	1609480	1946110	566830	1484310	1141030	1898490	1619820	1194400	983530
P96210	espG1	ESX-1 secretion-associated protein EspG1	0.557958	3.73495	-0.455764	0.347533	-1.71556	2.93716	9209410	9501280	9297320	8196700	7061740	9255710	8355580	16482100	12637800	19542300	14478100	11830400	11325300	10147800	5056590	8373010	5024670	4788090	3274700	1847060	2333530
P95221	Rv0264c	AHS1 domain-containing protein	0.556482	1.10905	0.869152	1.37622	-0.0146798	0.00584092	1051460	430519	1609220	1097780	NA	934575	310937	1679350	561630	1395340	1492300	2019960	1428520	2022190	806906	1843280	1784390	709249	927349	1038580	1071280
O53873	ercc3	DNA helicase	0.556177	0.916863	0.329927	0.00905536	0.140685	0.103627	30669100	24723400	21859700	32153700	19826100	20629200	18659700	39030900	23028800	34544500	41500600	29739100	24622800	36390900	8093830	26377000	28576100	36414600	21580400	22957600	25239900
I6X658	Rv3066	Probable transcriptional regulatory protein (Probably DeoR-family)	0.554749	0.484471	0.114473	0.231839	0.00257246	0.0557474	840349	2944800	2260130	1598090	2800970	3048960	2487840	NA	3654420	2068110	1192770	4076150	6790880	777452	4333240	4891090	1053330	NA	3566360	2492280	1013050
P9WMQ5	mfd	Transcription-repair-coupling factor	0.550986	2.50801	0.207161	0.0228328	-0.0838861	0.0103529	5051630	4632020	4733130	5038250	4073740	4519490	4029240	8389250	5821220	7751400	9035840	5353030	5056620	5666820	2500730	5603280	5091260	5468510	4379780	4198980	4360960
P9WMP1	cgoX	Coproporphyrinogen III oxidase	0.550486	2.57086	0.505771	1.016	0.0381926	0.0545258	3316260	2953400	3379500	3758680	3219560	3209300	2918780	4363560	4805470	4979160	4575580	5586590	4625130	5024360	2356060	4791040	4351750	3840020	2983570	3403210	3208650
P9WMD9	Rv0472c	Uncharacterized HTH-type transcriptional regulator Rv0472c	0.550149	0.922243	-0.0151253	0.124432	-0.123931	0.000234532	4630750	6808020	8811270	7035950	7562010	8800540	5855740	7155820	13177200	8078090	7249750	15328500	12526500	4508670	9416470	11241500	4439830	4609790	8266800	9565160	4646750
O53547	Rv3502c	Probable short-chain type dehydrogenase/reductase. Possible 17-beta-hydroxysteroid dehydrogenase	0.548829	5.28586	0.135573	0.359147	-1.85954	7.00988	5043370	3354610	4543190	3720800	3275500	4455180	5089190	6508880	7030540	6435380	6618420	6526070	5908370	5038040	3525530	4750250	5391300	1241680	1213690	510326	1278480
P9WG59	thrC	Threonine synthase	0.545716	1.26478	0.475064	0.477308	0.252768	0.235191	7654680	6088960	7835970	7264450	2765920	5268590	6738590	10561700	9645840	10027400	11159500	7350910	8409090	12486900	2688030	7892310	10840700	9706890	6006700	6520130	9537810
P96202;P9WQE5;P9WQE7	ppsA;ppsB;ppsC	Phenolphthiocerol/phthiocerol polyketide synthase subunit C	0.543721	1.29878	0.665164	0.71772	0.1086	0.215984	3973650	4849230	4097590	4448440	3218470	3546110	2441280	6739080	4533830	5765560	7506160	5819440	4045160	7589410	1815930	5514550	7087870	5632380	4506440	4038760	4062190
O05572	grcC2	Dimethylallyltranstransferase	0.542632	0.774556	0.592853	0.64225	0.464962	0.205728	4538470	4211010	5790140	5061510	5009680	6294010	6348040	5709940	10495700	4846620	5209000	9035530	19939300	4453700	12292500	10664100	4603710	5108930	8581180	8688620	5391430
O05899	Rv3256c	Conserved protein	0.53906	1.68501	0.398474	0.187899	-0.62489	1.33262	5253920	5738230	4536160	5960040	4175130	4593340	3645000	7531170	5098630	8744850	9167680	4539870	5817310	6437540	NA	3956050	6054540	3722960	2562120	1929040	3395160
P9WPX9	aroB	3-dehydroquinate synthase	0.536239	2.73503	-0.2578	0.292228	-0.110296	0.110787	3137910	3295310	2854480	3358420	2006800	2939180	2484720	4821460	4173970	3020730	3473990	4350750	4572130	3241320	2139770	2776670	1638760	2710470	3054200	2735230	1698650
O07756	Rv1873	Uncharacterized protein	0.52975	0.317176	0.117338	0.197775	0.236413	0.0557474	NA	1734200	670913	413963	755307	951482	1479240	825992	1959240	876786	581035	1587270	2118990	NA	566501	957869	925704	490968	1203340	959870	1050830
O06597	Rv1593c	Conserved protein	0.528766	0.613874	-0.553809	0.319285	-0.153114	0.0229587	11690200	14998800	17359700	11979000	23032400	20648000	16046400	11994800	34787900	15789400	12661700	44595100	30510700	8556030	13306200	16558000	7480010	9415080	22206600	19446200	8828300
O86312	raaS	HTH-type transcriptional regulatory protein RaaS	0.527562	1.27755	-0.935107	0.595965	-0.672786	0.270765	1174680	2124880	2057210	1452970	2191020	2396770	2340520	2011660	3802220	2323770	2061610	4112990	7491250	512138	1147920	1448690	1074720	1061530	1340920	1454120	1324930
P9WFQ1	Rv1898	UPF0045 protein Rv1898	0.52746	0.179085	1.34934	1.30221	0.367808	0.0103529	4190870	8840770	11115900	6100760	8448410	13159700	15778200	5099240	18813100	6672880	4684510	21046600	29522700	5832500	32888400	37347900	12163500	3855430	14316500	11513300	11302800
P9WJK5;L7N6A8	mutB	Probable methylmalonyl-CoA mutase large subunit	0.527005	1.65187	-0.124697	0.000414107	-0.484085	0.454074	5895850	8080250	6913210	6572190	4318630	6781530	5622950	10066600	8873590	11575100	10683600	5948450	6144060	7441500	4614420	7725360	4614480	6544690	5314650	4082930	2151120
O53506	Rv2172c	Conserved protein	0.525785	1.49426	-0.263248	0.107102	0.130298	0.126715	31005200	39745800	40967900	39238000	42632400	42130300	34910500	46279200	93222800	53130800	39884000	61314600	102416000	23557700	42675500	46895600	16473300	32176600	58938100	54828500	21288700
P9WQE5	ppsB	Phenolphthiocerol/phthiocerol polyketide synthase subunit B	0.522314	1.41389	-0.10731	0.183474	-0.418932	0.198505	3857850	3078980	2934450	3554060	2067330	2899840	2046970	5714620	2853990	4816190	5288790	3613060	2844810	4977430	2403960	3044240	2271260	3285710	2686730	1703080	1384250
O06813	opcA	Putative OXPP cycle protein OpcA	0.522308	1.01959	0.124029	0.456686	-0.452754	0.588527	15938300	17240800	17991800	15109200	19572800	21933800	22970500	19556700	32423600	20836700	15228800	30844800	32728600	18043200	21170800	30096500	17154000	11936000	15861900	14355300	11919800
P9WMK9	Rv2613c	AP-4-A phosphorylase	0.520811	0.452903	0.23187	0.152385	0.266846	0.147329	24805500	36376400	39453200	27958700	47305200	49627200	50755600	29623900	80841900	36887300	24907800	76324600	100993000	22153700	62864400	62534500	30129700	25919500	67575500	57681000	37257200
L7N653	cwlM	N-acetylmuramoyl-L-alanine amidase CwlM	0.517703	2.01418	0.318314	0.957596	-0.545791	0.253842	5553010	5924770	6014890	5991580	3600840	5384180	4326110	10222600	6885600	7980400	10218400	6709590	7919800	10617500	4014660	8742040	5105750	5345400	3671640	3936160	3210050
P9WQ75	ilvE	Branched-chain-amino-acid aminotransferase	0.517441	3.07126	-0.394211	0.47001	-0.165552	0.110237	10989000	8561840	10389000	10210500	8899680	10248400	8628840	13312200	14495600	13213800	14735300	17269200	16042400	10296200	4695940	11243400	5242250	10186600	8413390	9793710	6382870
P9WLX5	Rv1480	Uncharacterized protein Rv1480	0.517098	0.76781	0.21634	0.464811	0.407897	0.318688	16646400	20633300	20733100	23064600	18875100	26722700	29684900	23110800	33590800	25750400	21404100	36675500	35417700	20767500	24928300	36981700	23246400	18071700	32900900	30282300	24733000
P9WMI1	ramB	HTH-type transcriptional regulator RamB	0.511431	0.445589	1.21157	1.63838	-0.693904	0.313174	1329270	973600	1027490	1404210	NA	933979	853307	1343640	1352940	893110	1988920	1851630	1499540	2776180	767673	2614220	2020110	1136340	385763	582614	654417
P71983	Rv1725c	HTH hxlR-type domain-containing protein	0.510529	1.00024	0.879127	1.98751	-0.0394479	0.0545258	700559	813740	797507	NA	249287	846490	718172	781152	1589070	859865	695400	1933790	1299330	845828	1636500	1982840	1151230	691268	848777	765829	708968
P9WPY1	aroC	Chorismate synthase	0.506291	1.53262	0.0412422	0.119558	-0.623611	0.457084	10106000	9813300	10590900	11860400	7270120	8623430	8281930	15152700	13382900	14494600	14760300	11047800	11553300	15530400	4498050	11270000	8925760	9357650	6372630	6365900	6122130
O69689	Rv3722c	Aspartate aminotransferase	0.501627	3.34374	-0.114718	0.255458	-0.220845	0.235236	43327600	41439100	43321100	45702600	27916500	40720100	37626700	54609900	70724700	53609800	47044900	77761800	62729800	39003400	24373400	45032700	37539800	35652300	35775800	35462400	35339400
P96855	fadE34	Acyl-CoA dehydrogenase FadE34	0.499612	0.487964	0.0625097	0.207481	0.15243	0.0924781	425613	81485.6	500133	254196	149850	399970	865885	532715	598267	1733860	649723	205366	238411	370441	NA	417681	1149040	317147	386433	502652	1004250
P9WNY5	mmsB	Probable 3-hydroxyisobutyrate dehydrogenase	0.495426	1.3271	-0.103843	0.0203642	0.172961	0.0578433	14218700	14951300	17419700	12914100	19322300	14469900	15423100	19020200	28759100	17308300	14269300	23134600	26547700	15429300	12396600	21679400	7992380	16638300	17073000	18265800	10485300
P95208	fadE7	Acyl-CoA dehydrogenase FadE7	0.494272	1.36604	-0.220181	0.00795039	0.165656	0.1443	10837300	12884200	16189300	14878200	7513970	12962700	12923700	12560900	26364900	15571600	14576600	31385300	20837300	11084100	10469600	16538100	11104800	10066100	17650500	17110600	11881800
P71615	nrnA	Bifunctional oligoribonuclease and PAP phosphatase NrnA	0.493419	1.87277	-0.543371	0.493677	-1.83992	2.0105	2861270	3274360	3007680	3335920	1247920	2669640	1364550	4598650	2027180	4295080	5268760	3760980	3220260	2780940	888947	2140210	1786400	1211120	651854	704471	894052
P9WGV3	ahcY	Adenosylhomocysteinase	0.493033	1.58682	-0.312466	0.442777	-0.348302	0.12418	90373300	79971100	93434200	96629000	42766200	74947400	68314200	157873000	88637700	136465000	144666000	73208600	78887400	90116200	20970900	64562900	64232800	85043700	59610100	63133700	62502200
O07718	aceAa	Putative isocitrate lyase subunit A	0.492812	0.15995	3.15864	9.14139	0.724299	0.345988	2710090	1771660	1854200	1522110	948312	1356910	976402	1628460	1357460	1235540	2655320	3411680	2697380	15068400	9603000	15856500	12116100	3482650	2161450	2831370	2197980
P9WPR9	Rv1488	Uncharacterized protein Rv1488	0.492544	1.66173	0.386202	0.247045	-0.124725	0.0632523	40772400	30433000	39497300	35636300	20842500	36639700	40881200	47242300	40971600	51079700	54459600	52018800	55753800	49783400	16469900	45989000	50247800	32976400	34233900	29952900	36331000
P9WKG3	ispG	4-hydroxy-3-methylbut-2-en-1-yl diphosphate synthase (flavodoxin)	0.49229	2.08328	-0.191876	0.0112915	-0.411969	0.104982	24804200	23939700	24353000	24311900	16453100	19440200	20245000	34211000	38011000	34375000	33139800	24972500	29133000	31842400	12038300	22405500	19511300	27644900	18398100	17587900	13451700
P9WFY1	trpA	Tryptophan synthase alpha chain	0.491649	0.859689	-0.134124	0.0203642	0.24096	0.169856	39148300	48758600	57335700	37127500	65072300	53012700	56003500	47455200	102336000	53649400	39408700	95427700	128316000	33256500	58968500	62576000	37644300	37639100	76553300	73210400	52088200
P9WNW9	hisD	Histidinol dehydrogenase	0.488806	1.11895	-0.226661	0.470718	0.151942	0.0484762	6472920	6723870	9728240	8450650	6926520	8613370	6571650	9481970	8266160	12256100	12043300	8973860	9957760	8304930	3534020	8534150	2647930	8543080	7669780	7721830	3282080
P9WKX3	bpa	Bacterial proteasome activator	0.488477	0.213512	0.45651	0.0252709	0.551899	0.127183	2568150	2055910	1694930	2013270	2273720	4333680	6238900	3291230	3578680	3088660	2438220	1660600	8872390	1957180	3847310	2392770	3851210	2009510	2568020	6341840	4098590
O06348	Rv3485c	Probable short-chain type dehydrogenase/reductase	0.487837	3.12246	-0.707094	2.62228	0.0062859	0.0186941	14793700	13643300	15411300	11868300	8750460	12882000	12793600	16527100	20122000	17925200	14979300	18204700	18317500	11392300	6359950	8400250	7381560	13403300	12473200	13562600	10354600
P9WQI7	Rv2326c	Uncharacterized ABC transporter ATP-binding protein Rv2326c	0.485152	1.02552	0.844524	1.45377	0.194598	0.205728	3604210	2700270	2666800	3443810	1009400	2525240	1893700	4152480	2742290	3073810	6244360	3313140	5232650	7240580	2183090	4186490	5390910	4122640	2728940	3042340	3061460
P9WPC1	clpS	ATP-dependent Clp protease adapter protein ClpS	0.483664	0.379489	1.61552	3.57625	1.50779	2.27503	999856	676052	462135	232507	711797	547225	663905	743484	NA	NA	706128	1113180	1558540	1531780	3270290	2536910	1121160	2200310	1914630	1861330	992190
P9WNS3	dxs	1-deoxy-D-xylulose-5-phosphate synthase	0.483664	1.33432	0.533316	0.829227	0.560229	1.47843	12373900	13192700	12504200	13455700	7743340	11863400	12366900	19753400	14643600	16500300	20274100	18104300	15091600	23256500	6402990	19734100	16082200	22256400	18473600	18017100	15438800
P9WLF5	Rv2272	Uncharacterized protein Rv2272	0.482627	0.0423004	-0.37618	0.0262823	-0.0180668	0.0838117	207801	39330.7	164680	91724.4	NA	146532	608146	73763.8	NA	278869	155983	NA	661787	100277	112530	127251	969221	106030	154963	152376	1288890
O06319	cut4	Phospholipase Culp4	0.482442	0.111199	1.16195	1.49682	0.438939	0.100908	500435	770043	751596	531143	988102	837559	267145	NA	1050060	490786	457471	1132460	1789510	722127	5586150	2641420	484301	669247	1368490	1399930	454092
P9WHS7	pepE	Probable dipeptidase PepE	0.481245	0.913995	1.02288	2.48163	0.179679	0.294125	860597	1167430	988154	1157690	465014	1145230	1075760	1200840	1670960	1615690	1479840	1261650	1523570	1807490	955269	2564330	2669080	1207040	1340610	1229840	1204800
P9WGS7	Rv0687	Uncharacterized NAD-dependent oxidoreductase Rv0687	0.480185	1.0945	-0.353216	1.52824	-0.169375	0.593588	5169360	5090300	7627710	5699100	4605390	4872990	4771180	7445490	6360630	8101180	8281300	6755660	4461220	4549300	1112990	3951170	4018580	5124310	3928560	2627150	5457290
P9WFD5	Rv2624c	Universal stress protein Rv2624c	0.479245	1.29878	0.07704	0.200799	0.705379	1.54918	1525390	765945	1855090	800904	1729920	1615090	1505990	1839510	2321040	1931790	852060	2710870	3187680	1675390	NA	1609060	1542210	1692410	2568270	2555320	2419200
O50460	Rv1245c	Probable short-chain type dehydrogenase/reductase	0.47628	0.628027	-0.273338	0.00915292	0.567357	0.61196	25422600	37866900	47375300	23980100	51772200	51583000	57109600	35494500	89555100	46851300	30876000	118239000	84961200	22094200	49606900	58757000	28790000	30896600	93470900	82049000	58353000
P9WP73	hemW	Heme chaperone HemW	0.476218	2.66889	-0.643863	1.20789	-0.181263	0.269355	1023620	1452780	1507360	1022550	1436440	1509130	1296850	1765310	2158980	1872080	1478550	2124360	2245010	733035	NA	NA	1105600	1420130	1198070	773307	1335610
P9WHR3	hip1	Serine protease Hip1	0.476168	1.30502	0.492888	0.71772	0.109945	0.148151	13048800	11977200	12469200	14705600	5128990	10621700	13044000	17400600	13201400	17289800	23078900	12535200	19025800	19247700	7449480	15847100	23475400	14971800	11209600	11941400	16771000
P9WIQ9	Rv1835c	Putative serine esterase Rv1835c	0.474513	0.932466	-0.549575	0.374317	-0.0118698	0.0425574	1151210	1105450	1019980	1477020	550169	1002690	597814	1266850	770615	1562140	1492080	1342340	1608760	1247130	452957	723666	670078	1352030	1100170	923075	485772
P9WNV9	dnaJ1	Chaperone protein DnaJ 1	0.470898	0.916863	0.595846	0.667203	0.0369692	0.0393406	27870100	28642400	27906400	36087200	28557600	33772700	30531000	38890200	40504900	42891200	45808600	37401300	35124900	48500200	15971200	51574900	38077700	30591500	32860000	28180200	21769400
P9WP83	fbiD	Phosphoenolpyruvate guanylyltransferase	0.47076	0.502696	0.72204	1.41183	0.812804	0.608383	1852970	2124100	1702560	1457690	3261460	NA	2365560	2726470	3200760	1808990	2052920	2785110	6422620	3103250	3456980	6663050	2773370	3254670	4129990	3731540	2142700
P95105	Rv3054c	FMN_red domain-containing protein	0.46992	0.300646	-0.294731	0.0866446	-0.206932	0.051433	2341070	4172330	4811430	2998270	10096300	6080160	4712280	2642300	8461040	4592280	3349830	8650190	16068300	1893960	6865460	5494790	2188340	2844630	6247230	5320600	2447710
P9WI91	Rv1501	Uncharacterized protein Rv1501	0.468548	1.46968	-0.178198	0.29293	-0.372755	0.515229	4488510	3781640	4347530	4376910	5052210	4557960	4239630	5094890	7907020	3979890	3931720	7017910	8808140	3686710	4049970	4395730	2662540	3104240	3656390	3708030	3077960
Q50662	Rv2303c	Probable antibiotic-resistance protein	0.466574	2.56906	-0.641995	2.64359	-0.0385844	0.0351757	2386870	2571740	2250350	1873000	1303980	1921750	1930640	3208350	2852060	2483550	2427580	2376840	3617420	1387660	698672	1156310	1318100	2407290	1680760	1978320	1781060
P9WMJ9	dnaK	Chaperone protein DnaK	0.466219	0.97774	0.626749	0.507925	-0.423545	0.179759	471231000	428799000	435950000	505069000	211383000	506232000	417320000	768467000	505878000	799756000	698638000	330462000	497418000	794845000	164108000	671709000	674576000	398604000	329551000	300009000	320529000
P9WID5	adoK	Adenosine kinase	0.464888	2.06011	-0.528558	0.79366	-0.336444	0.66286	67144000	66998100	89894900	65444600	38598000	70170400	67544700	91931700	110043000	93414000	75341600	83598700	103245000	56493400	36601400	71989900	33237400	49687600	56667300	60412300	27376100
I6X654	fadE22	Probable acyl-CoA dehydrogenase FadE22	0.464667	2.59779	-0.643897	2.12052	-0.70492	1.39907	3887480	3039140	3526840	3212410	1905620	3169730	2192940	4396800	3302510	4772120	4642440	4351650	3946270	2546080	856627	1937300	2119840	1951380	2370390	1937730	1813430
P9WIL9	pafC	Protein PafC	0.461675	2.55365	0.452637	1.59256	0.212697	0.241756	10769500	8971350	9680610	9930020	8998040	9378790	10229500	13740300	15076600	12922800	11560800	12788300	19251000	12623100	9657660	16651200	13873500	11416300	11020500	9399990	12734800
P9WJL9;B5AFK3	murB	UDP-N-acetylenolpyruvoylglucosamine reductase	0.461534	2.43046	-0.444196	0.529053	0.385613	1.48905	3874030	3109040	3936850	3923020	2322330	3399080	3668440	5057610	6922910	5574820	4705990	5045310	4044080	3107050	1896660	3645150	2285510	4344170	5895040	5240840	3170700
P9WKD9	mku	Non-homologous end joining protein Ku	0.460651	0.549183	0.258044	0.374317	-0.63703	0.232463	1269200	1138310	1544730	990558	510647	1274440	767778	1017600	NA	1737080	1373790	1566500	2093390	1633400	388201	2274030	1089110	732798	731149	954379	673645
P9WQ59;P9WQ45;O53903	fadD25;fadD28	Putative fatty-acid--CoA ligase fadD25	0.46039	1.41311	-0.143458	0.164227	-0.362102	0.0121813	19347300	17680800	16091800	21809200	4483910	18718100	8048440	27762300	18152300	25092700	28929700	15143100	23561800	22791900	12101700	19912800	10786400	23743100	12391800	15120600	5848290
P9WM23	Rv1333	Uncharacterized aminopeptidase Rv1333	0.460217	1.17167	0.219547	0.0864573	0.252842	0.202674	3723060	3960330	4101630	3526350	3776930	3929420	4339510	3584010	7382800	5925610	3982690	4886180	10188400	4431190	2729450	4719390	5547770	5065330	4200970	4447380	4916840
P9WNG9	etfA	Electron transfer flavoprotein subunit alpha	0.459978	2.15938	-0.818022	1.54917	-0.205944	0.148282	275718000	251110000	373703000	284906000	361395000	375354000	355145000	400923000	525314000	512925000	332202000	541479000	464094000	220713000	182177000	288513000	134964000	295974000	319827000	352717000	142512000
O53669	Rv0247c	Probable succinate dehydrogenase [iron-sulfur subunit] (Succinic dehydrogenase)	0.459818	1.91367	-0.405422	0.835477	0.0822984	0.269355	22154800	20102300	19500600	22284000	11918800	18534700	16785500	31508600	23654500	29986500	31483300	19348800	22665500	20355100	5506280	14365000	15081500	26014500	21580500	19710200	17385900
O07226	Rv0299	Toxin Rv0299	0.459036	0.0341725	1.40134	0.948718	-0.76325	0.12985	NA	1921030	1926570	757522	5590290	3179390	1039630	465337	3724160	1165190	2094640	3194360	7439500	1052180	8676830	9605760	1486500	415197	1709000	2253120	557881
P9WHV1	proA	Gamma-glutamyl phosphate reductase	0.458727	2.23592	0.138253	0.101228	0.0808236	0.0350279	27037900	30717100	28741300	29008200	23827400	34747000	35057500	38073400	44212700	37347500	29982100	52459000	41660200	32919500	19098300	32594500	31256700	30704800	30654600	29860200	31054900
I6X961	Rv0461	Probable transmembrane protein	0.457836	0.111555	0.280397	0.326376	-0.594078	0.182689	13791700	12079000	9465900	13692200	8590260	9846820	10223800	NA	27211200	873175	NA	NA	NA	15234500	30866500	4333960	9599700	12443500	3099230	5040650	8505220
P9WPW9	murI	Glutamate racemase	0.456287	0.300964	0.123085	0.0584441	0.284702	0.0503304	5675760	5781510	6356760	5712900	9564840	7737430	7899170	5243580	12164300	6503530	4795650	10939500	12330700	5108100	8344580	9396080	5501220	4705890	9032070	8694490	6792590
I6YGS0	ephA	Epoxide hydrolase A	0.455572	0.320055	-0.853931	1.61465	-0.931151	2.02781	2102400	2371070	2377930	2426370	3241390	2621080	3072630	2265610	3689790	3282550	1209460	3372140	4621850	1342450	NA	1158280	1801920	1129800	1415170	777451	1742310
P9WQE1	ppsE	Phenolphthiocerol/phthiocerol polyketide synthase subunit E	0.454513	1.63633	-0.278928	0.207819	-0.787007	0.530887	9065620	8465530	8439850	10913400	4174450	7699440	5522910	12503600	8944620	12295600	13945300	10835000	9635910	10647100	2369980	7560160	6352140	7382550	4929820	4852730	4519250
O53695	mycP3	Mycosin-3	0.454311	0.690317	-0.0465479	0.168153	-0.189533	0.152553	9157060	6266900	8536070	7105070	2799280	5482460	6618040	9237220	5140980	9425360	9754010	6362560	8897910	7677760	NA	3711470	6407920	6952870	4244000	4653710	8457360
P72007	fadD1	Possible fatty-acid-CoA ligase FadD1 (Fatty-acid-CoA synthetase) (Fatty-acid-CoA synthase)	0.4506	0.995596	0.239043	0.368519	0.25801	0.365556	1893640	1850950	1818410	1976510	1639510	1612320	1763790	2413870	3438180	2149960	2556240	NA	NA	3177350	1426380	1829740	2462470	3393850	1968190	1425330	2380820
P9WNY9	menJ	Menaquinone reductase	0.448388	3.06951	-0.403895	0.771172	-0.0191732	0.0607158	3518450	3385950	3377150	2899670	2999830	3911720	2392780	4893720	4893610	3463130	4322730	6161080	4092200	2589760	2515240	3122760	1807610	3798760	3286790	3378340	2438400
P71905	rne	Possible ribonuclease E Rne	0.448128	1.76117	-0.0278526	0.584626	-0.046223	0.0359863	23665100	23149100	24173800	28115100	17229400	23380100	23524100	36302000	28409700	35776700	42252000	22885000	28364500	24103500	6094340	22797600	23351000	23262700	23380300	21367400	22302000
P9WP49	csoR	Copper-sensing transcriptional repressor CsoR	0.447073	0.382221	1.40775	2.19029	-0.129753	0.00949773	2336750	3159530	4409170	1518030	3926720	3974940	4662120	2484920	8554840	4818980	2627160	5887390	10927700	3568180	14159600	14526800	6677410	1756960	4297680	3814810	3363140
P9WJI9	pncB1	Nicotinate phosphoribosyltransferase pncB1	0.447018	0.832051	1.46705	5.31455	0.0531379	0.0765813	2523520	2762830	2106530	2017860	3384450	2883590	2652650	4309310	3232300	3953590	3027730	3424680	3807610	5439050	5685800	9143280	8981040	2433580	2415150	3070770	4420010
P9WM39	Rv1288	Esterase Rv1288	0.446598	1.28829	-0.467868	0.60047	-0.00855299	0.0811136	7807210	7140990	6979930	7857090	3902360	7892380	4747260	6360340	9134410	10329400	8248090	17943000	11261000	5215800	1701860	5110530	7355150	8423860	6546130	6739020	7458540
P71988	Rv1730c	Possible penicillin-binding protein	0.443347	0.858624	0.41128	0.156171	0.201747	0.205454	1432480	1264400	1422780	1367280	NA	917918	943243	2132170	924325	2242870	1943310	1635130	1418650	1551490	286541	1948290	2224990	1649820	1376850	1278980	1917260
P9WGR9	fabG2	Uncharacterized oxidoreductase Rv1350	0.439734	0.796652	0.40189	0.261594	0.569428	1.03322	1932430	1784470	2306370	2034720	1731410	2346060	1875740	2017100	2853710	2388410	1939010	4181830	2930560	3148710	1080240	2593930	2512470	2842750	3046530	2892450	2407440
P9WGE7	sodB	Superoxide dismutase [Fe]	0.439341	0.671906	-0.749136	0.251212	-0.635988	0.204529	125707000	157758000	245727000	100317000	149169000	206300000	172572000	124097000	270953000	156882000	126826000	396574000	654407000	53565300	134154000	190590000	27122900	67591500	135443000	155143000	27502000
P9WPP5	cyp123	Putative cytochrome P450 123	0.438019	3.13212	-0.291998	0.37521	-0.489575	0.40147	1447360	1379030	1214710	1456030	1565240	1502980	1121280	2510950	1771310	2707130	2150290	1744840	1634980	1279540	NA	1182160	1001160	1196140	NA	NA	865581
P9WN53	gcvP	Probable glycine dehydrogenase (decarboxylating)	0.437846	1.34228	-0.603444	0.324084	-0.316391	0.0798263	8344770	6939690	7368510	9363670	3275940	6419880	5132830	13513300	7501030	11299700	14463400	6236660	6787670	9070910	1728880	5319310	3815830	8053490	5460450	5685750	3494950
P9WIH3	pckG	Phosphoenolpyruvate carboxykinase [GTP]	0.436555	0.934905	-0.210766	0.238405	0.129439	0.212744	25391500	18338500	18700700	27788400	7678820	15964700	15811600	35516000	21488900	28148600	33697000	14965000	17710100	25240900	4467490	14774800	16917000	29751300	21607000	18433800	18512800
P9WM37	Rv1289	Uncharacterized protein Rv1289	0.434997	0.692939	-0.412617	0.355518	0.102368	0.0489533	2729540	2101740	2898170	2925720	3601750	3527810	3796820	2894520	4930600	2980010	2440330	5109730	7650160	1698730	2357870	3250430	2038080	2291880	4124710	3989840	2166180
P9WLW5	Rv1507c	Uncharacterized protein Rv1507c	0.433421	0.308645	-0.49822	0.611228	0.517816	0.467059	7102940	6965090	11652500	7826090	10374200	10795000	7405620	7333390	16372700	9146000	6539620	16560300	11991200	4199790	6881640	8021720	1633790	6756320	15131200	16541200	7279380
I6Y1G8	Rv2675c	Methyltransf_25 domain-containing protein	0.432335	1.5085	0.243542	0.205819	0.132325	0.21804	3101300	5183430	3700960	4350960	1655930	4419330	2752190	5589950	3869090	5153500	5949530	4834770	4030130	4642270	2343800	4857170	4120830	4048930	4044280	4258260	4064010
O06539	Rv1139c	Conserved hypothetical membrane protein	0.431685	0.152367	-0.0160234	0.0430798	-0.363373	0.473937	444942	604113	414918	753636	NA	450426	NA	NA	395677	607727	759833	543859	607538	647762	NA	445451	388748	585303	312983	387290	244553
P9WHU1	prcA	Proteasome subunit alpha	0.429611	3.56539	-0.0360762	0.309348	0.109396	0.371498	25169700	24923000	26686400	23158500	15515600	26102600	24170200	34368100	32768000	32665100	32031000	35249800	38594500	24270500	12753000	26280600	24344500	25074900	27591200	27294400	26478300
P9WLZ3	Rv1367c	Uncharacterized protein Rv1367c	0.42376	1.95895	0.549843	1.89051	0.514032	1.58438	4564550	3927290	4121600	3921860	2851360	4020230	2982080	6393030	5908090	4975320	4523650	5217630	5318650	6656650	3549240	6941810	4841880	5800930	5904210	5415690	4251770
I6X486	PE25	PE-PGRS family protein PE25	0.423227	0.00566074	1.81991	1.21635	1.47676	0.216366	553417	1348250	909563	619261	5541910	1852020	1220450	NA	1636530	NA	NA	713740	2647730	811422	10667500	6627070	1990730	1864310	4164190	3488750	3304830
P9WL45	chdC	Coproheme decarboxylase	0.42222	1.57471	-0.143566	0.0864573	0.0985811	0.176513	17080500	19663500	20070300	22890000	13972300	21854600	12636500	20669200	29609900	21448300	24819300	27878400	31307900	20403200	10017200	22914400	15198700	20905300	22433000	21202900	13898300
P9WJY1	Rv0037c	Uncharacterized MFS-type transporter Rv0037c	0.421857	0.501101	-0.229108	0.10356	-0.526734	0.0411491	2181680	2078910	1758570	2257100	1282320	2019620	NA	2746600	NA	2745300	2988410	1306360	1997110	1703160	NA	NA	1793550	3025730	1294900	1367800	1477090
O06569	Rv1117	Conserved protein	0.420366	0.371516	-0.644293	0.312819	-0.217397	0.00404587	3917590	5156100	5045840	6249000	4591630	7582460	7413390	3461280	8628930	4558330	5171550	11723300	14773700	2731160	3111470	6848050	3486340	4633040	4236650	9363410	3133730
P9WJL3	murE	UDP-N-acetylmuramoyl-L-alanyl-D-glutamate--2,6-diaminopimelate ligase	0.42035	2.30336	-0.419285	1.06245	-0.15084	0.294125	18026800	17016400	18617900	16471200	17884000	20123000	18476800	23530500	29012900	24718300	17165900	33138900	21367300	16811800	10482600	16345700	10615000	17042800	15907300	16567100	12529600
P9WK65	lppX	Putative phthiocerol dimycocerosate transporter LppX	0.420276	1.87331	-0.281452	1.33252	0.0627603	0.147485	22700300	20702700	24790700	22481200	14691700	20758200	22005200	28036700	23539000	32985100	27244500	30857300	32341400	19217200	4181320	16992900	21209600	24148900	21818300	21117700	27164200
O06827	Rv1431	Conserved membrane protein	0.418885	0.620632	0.601513	0.991021	-0.0634	0.0874409	1217870	678915	757661	871202	NA	870012	607376	1530020	559122	1223700	1633450	952326	681417	1743670	NA	1000680	1234840	1489540	714664	667617	843029
P9WGS9	dprE2	Decaprenylphosphoryl-2-keto-beta-D-erythro-pentose reductase	0.416708	0.97774	-0.922331	1.22529	-0.0251982	0.147485	9626450	7346270	7646530	11969400	5336480	9718050	6183570	8188930	10462700	9951670	9535400	12686600	20161400	5215430	2803950	6294010	2854040	8258280	7676090	7352180	3322380
P9WIU7	lysA	Diaminopimelate decarboxylase	0.415153	1.21208	0.00159357	0.0137616	-0.130085	0.000771409	11252200	8697790	9843060	9385940	4452410	8736090	6911700	12557600	10740500	13508900	13479400	9320650	9199820	12808700	4341660	8252030	9239460	10610800	6844630	8280940	7684750
P9WPD1	clpB	Chaperone protein ClpB	0.415004	1.27666	0.514685	1.90725	-0.110806	0.142748	34223300	37416100	36628800	38615900	35913600	44791100	35419200	49671300	44301800	50520600	52714300	46075900	48003200	57007700	33977600	70888100	47654100	33178100	37318400	34663600	29101800
O53504	Rv2170	GCN5-related N-acetyltransferase	0.412888	0.727593	-0.0772501	0.00396355	0.0470889	0.0548653	3120170	4483540	4633630	2198280	7639360	4724950	4060970	5602010	6336300	3733690	3456530	7656460	10285700	2916240	5898800	5583320	1899130	4044540	6024540	5220050	2710820
P71552	Rv0958	Possible magnesium chelatase	0.412217	0.741401	1.71367	7.81197	-0.967338	1.30646	3533540	3443600	3382180	3093980	3782200	4270640	3298250	5193850	3707680	3867130	4057590	5107410	5108060	11418200	7144920	11460200	11171400	1703030	1618370	1819420	2179240
I6XY36	Rv1498A	Conserved protein	0.411574	0.0610202	0.265367	0.00490118	0.499989	0.0365352	20955000	19393000	20380100	10573500	59557500	30206000	16145800	24255500	29961100	10234400	8220590	49033100	44462100	15163500	33827900	34800300	7985100	31670800	31857900	25972400	10058800
P9WKP7	Rv0897c	Uncharacterized protein Rv0897c	0.411489	1.0058	-0.0207471	0.180554	-0.308263	0.093283	784759	772102	978092	1087100	136814	405550	717904	1306640	1038080	788271	1026940	515271	NA	716730	805426	1008460	462227	757083	593828	504960	653292
P9WJZ5	Rv2003c	Uncharacterized protein Rv2003c	0.411075	1.17868	-0.20739	0.0762745	-0.377836	0.111282	1182720	1101750	1292880	605169	1378820	1323870	1132400	1448080	1623270	1522000	825306	2987420	1712090	1121980	926734	1375030	653747	959310	1320990	861111	779707
O06428	grcC1	Nonaprenyl diphosphate synthase	0.410212	0.75623	0.193251	0.183474	0.403095	0.546447	26796900	30915100	33766800	30956600	36361900	43139300	42662700	35912600	52602700	37141400	33767900	54835600	79862200	30584100	46629600	50442200	22451000	32753900	59448100	56548600	32516600
I6YGE4	Rv3528c	Uncharacterized protein	0.410002	1.35755	-0.360319	0.151575	0.013439	0.103627	59167300	66590500	69003100	59212900	54742400	71392400	67318300	71016100	132948000	78219800	67199500	110170000	98736200	42751100	60995900	80046300	38470900	48930900	86160000	84222300	50205100
P9WH13	rmlA	Glucose-1-phosphate thymidylyltransferase	0.40822	0.678242	-0.504246	1.00894	-0.236592	0.318688	24983800	26125600	26618700	23271600	35387500	31903900	25855500	23860800	43390300	27418800	22345400	63132400	41921000	21386500	11398200	20398500	16440100	21544600	22803500	23051300	18646800
P71672	Rv1404	Probable transcriptional regulatory protein	0.407105	0.431623	0.297849	0.166974	-0.0960947	0.0489533	34202200	61071300	72017400	45655000	88510100	93497300	113649000	47793300	160899000	58326300	37549200	132667000	304256000	23980100	148306000	133924000	43139400	26728000	83773100	79882400	54871100
P96877	Rv3272	Probable fatty acyl-CoA transferase Rv3272	0.406917	1.23953	0.487915	0.47253	0.102168	0.0829987	8276130	5797820	7284960	7915500	5986300	6856350	9098820	8843790	10208600	9763600	9248720	10743400	9553920	10594100	4077750	10355400	10077700	8068750	7570390	7395800	8388210
P9WJA1	hsaA	Flavin-dependent monooxygenase, oxygenase subunit HsaA	0.405708	2.07983	-0.533117	1.47844	-0.608166	0.683868	12655500	10378100	11024200	10235500	4655530	10364800	9254790	16330400	12784200	15857400	14677100	10374600	11786700	8093760	2711410	7833810	6491590	9114600	7011130	6588110	6061940
P71947	Rv2650c	Possible PhiRv2 prophage protein	0.405184	0.453385	1.38743	2.26414	0.524727	0.421845	1144140	669091	722415	799619	537764	759192	855742	1364300	668552	1342180	1624780	634319	451734	2062010	728806	1910270	2160350	1075190	1232380	1066240	1109250
P9WGB1	cobM	Precorrin-4 C(11)-methyltransferase	0.403518	0.852576	-0.0222665	0.0576178	-0.0876702	0.0197819	2930540	2621550	3192540	2129920	3054760	3734150	3934360	3239760	4040620	3158450	NA	4877300	5180650	3301130	1897190	3828600	2714820	2199510	3549800	3837310	2010770
P9WQB3	leuA	2-isopropylmalate synthase	0.402535	1.05805	-0.267889	0.237985	-0.363189	0.0103529	18751000	15403100	15419600	18660000	8405680	13659800	12385200	26449700	17154700	23565800	28781700	11192600	15070300	19388200	3846870	13125600	12460000	20770400	11614900	12335200	11499300
P9WNV3	ligD	Multifunctional non-homologous end joining DNA repair protein LigD	0.401827	1.05263	1.23829	3.12371	0.376424	0.486179	1460710	1199500	1114460	1480720	1355160	1410540	1240000	1790410	NA	1305100	2343880	1661330	3999430	3849220	1979020	3670590	2723580	2417640	1738610	1779710	1563920
P9WMQ1	uvrD1	ATP-dependent DNA helicase UvrD1	0.400977	0.858624	-0.201228	0.0789995	-0.379648	0.107164	3171040	3260940	2679420	3937100	1813340	3001150	2198700	4619320	2328280	3411640	5045390	3400610	4513810	4476670	626827	3185620	2035240	3394890	1997050	2616470	1531290
O07754	Rv1875	Conserved protein	0.400642	0.32047	-0.162741	0.00158351	-0.00352605	0.0234625	21876700	34171000	43935400	22178100	60141000	52999700	63557100	32771200	85887000	48397500	22415900	80900500	67600300	23032900	49590600	62563900	28906700	21158000	53664400	49851600	37804700
P9WI03	PPE33	Uncharacterized PPE family protein PPE33	0.400129	0.752806	0.810261	0.69881	0.445612	0.304969	2684320	4368540	3752530	2204030	5261690	4465120	6615310	3891780	12970000	3843580	3757620	7637900	12571900	3661540	7082330	8238390	10662700	4902230	5949480	NA	9986820
O53462	Rv2016	Uncharacterized protein	0.399687	0.607092	0.732969	1.82707	-0.396379	0.0419721	2191330	4182130	4250190	2356940	4664150	4009640	3292820	3297280	5110120	2620060	5469090	9023510	8306320	4588440	8740050	10602900	3889980	2189810	4363440	3902940	1835950
I6X5G8;P71627	Rv2825c;Rv2828c	Uncharacterized protein	0.399463	0.214767	0.835501	1.04659	0.357618	0.337742	2951050	3708420	3394400	3539280	7038230	3782670	3831450	3882760	7377680	3118710	2463960	5900180	8029240	3112740	9985520	8909990	4325190	4288960	8406240	5214300	4055870
I6XFA9	fadE21	Probable acyl-CoA dehydrogenase FadE21	0.399212	0.765495	0.177167	0.007535	-0.503422	0.272561	4371410	4679370	4572790	6079770	2033200	3858000	3162600	4284310	5521090	6008830	7274230	6073150	4771820	5399950	1339270	4485220	6555100	4349840	2717710	2480490	3449750
P9WQ61	fadD22	p-hydroxybenzoic acid--AMP ligase FadD22	0.398851	0.792063	0.516956	0.264105	-0.128798	0.0921998	9594190	10496300	9011920	8934760	10557700	9074850	7330460	15584700	10323900	15443400	13605700	7925460	8797160	14798100	4603730	11416300	14554700	11761000	6618370	5830880	9981220
P95197	purT	Probable phosphoribosylglycinamide formyltransferase 2 PurT (GART 2) (Gar transformylase 2) (5'-phosphoribosylglycinamide transformylase 2) (Formate-dependent gar transformylase)	0.398466	0.588825	-0.0215982	0.0733476	-0.550287	0.176279	10691100	9086480	9373250	13201100	4639460	9136430	7166430	16178100	8776260	15309300	16614300	5547980	8293660	14922600	1641710	6927940	11073400	10790600	4804370	5677000	6801250
I6X630	Rv3032A	Conserved protein	0.398326	0.226657	-0.0584964	0.00490118	-0.0733517	0.0183416	3100510	3433530	5313100	3542930	4481810	6561680	4454070	2741320	9026570	3396230	2598630	8346390	8344500	1478370	5434370	7108130	3119800	2619660	5639910	4881150	3585390
P9WQK7	uvrA	UvrABC system protein A	0.397699	1.53681	-0.0611669	0.101228	-0.225445	0.0163012	11399800	9854550	9489880	11140200	7016760	9738390	7995080	14249000	12761600	12474200	14163100	12897200	11919900	13202700	3601780	10374100	8294170	12008800	8361760	8297340	8251330
P9WPX3	ask	Aspartokinase	0.396992	0.825423	0.262181	0.0835978	-0.0123574	0.00513212	30454800	20672300	28916400	29671100	13686100	23408600	19443800	34880800	22001100	31927900	39137400	24704600	29719100	33976300	10130300	31891500	24255900	28093000	20837200	23093400	23324500
O33181	Rv1778c	Uncharacterized protein	0.395619	1.98672	-0.150364	0.0203642	-0.120177	0.142009	3487400	3432970	3776630	3444460	1657460	3133910	1669140	4793950	3462750	4378340	4653850	3668560	5966980	3889770	1410200	3439600	2746770	4010690	3204440	3112740	2415790
P71858	fadE29	Acyl-CoA dehydrogenase FadE29	0.395588	0.858624	0.706675	0.607971	0.0585555	0.168658	1612150	3226870	3273690	2214010	1790500	3730160	4543970	3488830	15896100	3631310	2403650	4858450	13910600	2010660	10215400	8522090	1901680	3404970	3316100	8300340	2502090
P9WF87	vapC24	Ribonuclease VapC24	0.395393	0.210192	0.224723	0.111573	0.0172182	0.0869627	1268310	1223630	1406280	1470070	3827750	1971990	2423860	1283010	3972030	1311930	2100060	1767110	4433640	788935	2381560	2179970	1255740	1329630	2285530	1645810	1259010
P71733	Rv2410c	Conserved protein	0.395364	0.77673	-0.0557869	0.00754178	-0.329843	0.217559	9770710	11712000	14458600	11411000	14566400	14343600	12391900	13409000	22400600	13750800	10367000	18846700	26032700	8194440	15649300	17488400	5217100	6954860	12763700	13117800	6167510
I6Y120	aroE	Probable shikimate 5-dehydrogenase AroE (5-dehydroshikimate reductase)	0.395313	0.582202	-0.146319	0.0957548	-0.00262536	0.0343686	2878150	3074630	3384600	2286880	3560740	2692820	4283320	3586940	5591210	2541910	2161220	5515950	4500740	2198800	3357380	3823210	1922640	2086220	3493500	3800430	2644580
P9WF81	vapC28	Ribonuclease VapC28	0.394683	0.429068	-0.414355	0.179148	0.00196853	0.218844	531365	780785	532302	906895	485180	705071	624719	845286	1092330	959060	797292	469932	771261	362880	NA	769736	468761	466161	669092	1371630	582052
P9WN49	glmS	Glutamine--fructose-6-phosphate aminotransferase [isomerizing]	0.394468	1.28189	0.0530685	0.0329889	-0.327537	0.119051	12220300	10949000	12130400	12271400	3663370	9485910	8193570	17419000	10730400	17314300	17650300	11469700	10079500	13837800	2936540	10368900	12349600	10568200	7611260	6958850	9839160
P9WFE1	hemE	Uroporphyrinogen decarboxylase	0.394144	0.498025	-0.103933	0.0217	0.426328	0.226176	9740290	8863900	12433200	12215100	14461700	19062300	14190600	10182900	24586900	11376200	7738510	21302300	35260400	10641200	12480300	15711100	10657700	11545000	19908700	17802900	15612800
P9WFY5	Rv3579c	Uncharacterized tRNA/rRNA methyltransferase Rv3579c	0.393641	0.985546	-0.398468	1.01023	-0.0178766	0.0348749	5307320	4752470	4421340	3653260	6021520	4061780	4759130	5950640	7088070	4305830	4634520	6969030	6536040	4485470	1701310	4260580	2950470	5994360	4852860	4535030	3081340
P9WHF1	ribBA	Riboflavin biosynthesis protein RibBA	0.393379	1.46968	-0.2511	0.128608	-0.447024	0.139856	7771140	7422780	7802760	8724970	3387470	6413420	5038600	11274000	7484640	10941100	13465100	8558040	7305500	9389920	1874170	7112970	5361090	7259170	4925940	5964090	3876480
P9WK89	Rv1592c	Probable inactive lipase Rv1592c	0.386486	0.364566	-1.53726	1.51787	-0.424159	0.617932	1803490	1994430	2138310	1854680	3071140	2381800	867707	2607130	2834500	3122080	1695520	1353280	NA	687157	NA	1517550	478225	1497300	1475490	1700050	566903
P96379	mazG	Nucleoside triphosphate pyrophosphohydrolase	0.38638	2.03894	-0.201477	0.267909	0.0307463	0.0725504	8150200	8476540	7311700	9638810	9377830	8241470	7368820	10898100	10646900	12366600	10371100	8671840	12512100	8144610	6139510	9504400	6189940	8783450	8994220	8054540	4549530
P9WII5	mazF4	Endoribonuclease MazF4	0.385665	0.585049	-0.200333	0.00812635	0.224268	0.127235	1765660	3520370	2891470	1669800	2925000	3579060	2571840	2124550	7350960	2530370	1399000	5024820	10126400	765640	4414080	3945370	1087810	1700140	4784100	4682720	2072820
P9WQ69	csd	Probable cysteine desulfurase	0.382413	1.89043	-0.480094	1.93731	-0.549491	1.16458	11779400	12303200	10762700	12917500	5590190	9545250	10558100	14480900	13860000	14198800	14903100	11786900	11312400	8316950	4896930	8334340	7115270	9601430	7079950	7412350	7295120
O05861	Rv3205c	Conserved protein	0.380218	1.54904	0.107773	0.00396355	0.148358	0.149485	19117000	19386100	20993300	18056500	19090200	22508000	21329500	22177300	26511200	23952300	20339400	34863700	29460100	21709800	13837500	24831200	20069700	20369700	21986300	22768800	20985200
P9WFH5	Rv3767c	Putative S-adenosyl-L-methionine-dependent methyltransferase Rv3767c	0.379907	0.742402	0.850704	3.9427	-0.932637	1.5987	9222790	10102200	10002100	9421050	10013000	11559400	12319400	11020300	14570300	11488700	11426700	15055300	17512700	17090700	19023800	26435200	12704600	4405160	5632360	5391190	5100430
P9WKI5	guaB3	Uncharacterized oxidoreductase Rv3410c	0.379621	2.43334	-0.287236	0.771172	-0.248252	0.195821	16304000	14599900	17956500	15839800	9932610	16369900	16317900	20002200	26747400	22329300	18949200	25569800	20093700	15818300	5757120	14863200	11858100	15239900	13507200	13946000	10663100
O53203	gdh	NAD-specific glutamate dehydrogenase	0.37782	1.25233	0.00391561	0.0526137	-0.713911	0.410233	31151900	26460000	25259600	31488900	11406700	24758000	18885500	39239100	27318200	36039900	43527000	28125500	29603600	34596800	8106780	25884600	24771900	25868500	13515300	14983300	15816500
P9WMN9	hemL	Glutamate-1-semialdehyde 2,1-aminomutase	0.376333	1.72307	0.273272	0.349599	-0.269308	0.685537	15187200	12055800	14280800	17411200	15665000	14776600	13640600	16659800	20264000	20201900	18834500	19526700	18301400	18404100	10271400	19132400	17312300	12527200	11454700	12513100	12007700
P9WK53	lprB	Putative lipoprotein LprB	0.375984	0.585049	-0.144618	0.252489	0.361919	0.513926	18507300	17033200	21080900	15929400	13908200	21693700	16936000	22397400	18462900	27139000	21811400	15348900	25677400	17822400	7823020	22072000	12994700	17300100	26479800	27936800	13879000
O53676	cobU	Adenosylcobinamide kinase	0.374833	0.0944752	-0.101792	0.143614	-0.246074	0.110861	2622940	4159530	8542840	2739280	4664500	5341450	3784250	2167610	4548670	5393620	NA	5489080	10695700	1169110	5356130	5637370	2396190	1192370	5028210	5829360	1986320
O50442	Rv1186c	Conserved protein	0.37194	0.135112	1.31627	3.5728	-0.358344	0.151467	1304730	1304620	1532170	1198030	2073270	1787210	1004610	NA	698348	NA	1688440	2679810	NA	2865820	3632280	4361970	2152240	990584	1044950	1750000	724440
O53726	Rv0439c	Probable dehydrogenase/reductase	0.371045	2.07314	-0.561738	0.65671	0.155805	0.311992	26146600	24995300	29649400	25530600	16072600	24524900	17865300	31928700	32723600	29291500	31444100	50805900	37918200	24406100	9688500	22930000	10937900	26554200	29137500	31856700	19493700
P9WPA5	coaD	Phosphopantetheine adenylyltransferase	0.370381	0.142748	-0.35861	0.153532	-0.311394	0.0634669	6989060	12072500	18794000	8858580	17015700	16030900	12425600	6332200	21191900	10933100	6544780	22201300	33626800	4017940	16494200	15363900	3794010	5569360	14457300	17856800	5173530
P72040	Rv3773c	Conserved protein	0.369387	1.0543	-0.0205988	0.153532	-0.21581	0.0644488	6763010	5422890	5851130	6334050	4097670	8292520	7370650	7346320	8171460	8193240	7009450	9986190	18073200	5295770	5457030	10806900	7031480	3641350	8073490	5677830	5230200
O53310	Rv3160c	Possible transcriptional regulatory protein (Probably TetR-family)	0.368752	0.614301	0.332067	0.327265	-0.29399	0.0566971	2884580	5588470	4943190	3248920	4413920	5951710	6007990	4473830	8291810	2686840	3407910	11934700	17967500	2473340	10602200	8345580	4099550	3010800	5188580	3793010	4270750
P9WK45	lprG	Lipoarabinomannan carrier protein LprG	0.368478	0.733551	0.21986	0.149531	0.0990077	0.152569	30364900	22201200	32611900	29881800	13223300	27319700	47169300	36088500	35899300	47335200	37820100	39334100	45027600	31954800	11802000	37647100	65308300	29857000	32312400	31696600	49676500
I6YGH7	fadE31	Probable acyl-CoA dehydrogenase FadE31	0.366814	0.815093	-0.298466	0.407899	-0.202337	0.0275505	1496120	1493820	1634710	1278620	1614330	1683630	1185090	2033020	1069720	2043800	1825480	2708370	1316860	1357270	NA	1057400	1216520	2112580	1280130	1269220	1320550
P9WJT3	mmpS2	Probable transport accessory protein MmpS2	0.365144	0.754711	-0.274444	0.0502582	-0.119112	0.0558111	412206	805816	847005	879367	684094	751822	431646	446427	876600	990604	1184590	1762890	946105	775437	441889	829347	467729	705221	679266	929045	560715
P9WF79	vapC29	Ribonuclease VapC29	0.36371	0.516577	-1.00494	0.418207	-0.443441	0.000585081	1318410	568833	1623490	1265440	1644560	1117800	707158	1622800	1073400	1572150	1661060	1673640	1633760	954918	NA	NA	306196	495025	1366130	2078420	377434
P9WHK1	Rv0571c	Putative phosphoribosyl transferase Rv0571c	0.363559	1.17167	0.272595	0.501113	0.43525	1.44917	1449450	1547710	1628810	1301910	1361310	1702910	1491020	1461610	1853730	1982950	1577720	2341810	2896140	1862610	1301520	2141960	1739630	1903270	2340920	2128880	1791590
P9WMR5	dinG	Probable ATP-dependent helicase DinG homolog	0.36296	0.277804	0.475987	0.824417	0.320598	0.239895	1272480	776024	1794250	1162930	1540350	1438970	2472050	871670	2990990	1730200	1425810	2852210	1971010	1547910	2422490	2987700	1580350	1295600	2298510	2377360	1277910
P9WPX7	aroQ	3-dehydroquinate dehydratase	0.361724	0.80786	-0.0741564	0.060018	0.10991	0.0452448	6300190	7542620	10483400	6036540	3383740	8922920	12647600	9189740	19943200	9023030	6503880	10194200	27141200	4375640	14861100	9953790	2382420	6363090	12291700	9916310	3941440
O53716	Rv0381c	Uncharacterized protein	0.361339	0.132815	0.27022	0.0719113	0.0338316	0.0644488	1329110	715816	661815	1091620	463051	687349	664367	887398	NA	1231170	878563	490650	NA	846636	NA	626315	828937	1038280	570928	607395	799921
O33336	pptT	4'-phosphopantetheinyl transferase PptT	0.357126	0.09139	0.377356	0.0179951	0.862061	0.313775	1788000	1574170	4806100	2270430	2126930	2937180	2703590	1842580	3393270	4210700	1844540	4407790	2422990	3137710	1525580	2760680	3817030	3377360	4986090	1283490	4876260
P71839	Rv0786c	Conserved protein	0.354531	0.620379	0.867621	1.36143	0.220159	0.127183	2574830	3855090	4016900	3157590	3834220	3423840	3280400	3250220	8835840	4674450	3446520	4080790	9216710	3711030	8783600	9212350	3131510	2611420	5748280	5056110	2920490
P9WNN5	echA14	Probable enoyl-CoA hydratase echA14	0.350913	0.554464	0.270394	0.216595	-1.67608	2.38471	6516220	5246430	6029280	6381270	6363670	5972400	5524040	7771220	7025890	7607870	7904260	4484220	8887200	9827570	2606860	7781480	6762800	2833570	1779750	1437200	1993760
P9WL77	Rv2585c	Uncharacterized lipoprotein Rv2585c	0.346764	0.240507	0.455477	1.21635	0.0337262	0.0194509	1861950	1482990	1616490	2492420	1112490	1799380	2000460	2385010	1060470	2288280	2895500	1291980	NA	2432080	3864210	1701680	2502670	1972190	1538560	1711690	2241080
I6YDV4	Rv2609c	Probable conserved membrane protein	0.346638	0.97122	0.640957	0.770847	-0.0654698	0.0197819	4905570	3993810	4818040	5408290	3089600	4640050	3861950	6384460	4593190	6541290	8397750	5122920	5416060	7772190	2221470	7264600	7206450	5045980	3551970	3863370	5005010
P71814	phoP	Possible two component system response transcriptional positive regulator PhoP	0.339825	0.172104	-0.30594	0.11936	-0.370411	0.107411	28301300	44012000	46633400	35106500	75794000	57026400	45249500	27941500	71896300	42639500	32536500	102113000	84189000	13604800	59601200	64156200	13096600	17238500	52768100	59529200	16178700
P9WPJ1	cas6	CRISPR-associated endoribonuclease Cas6	0.338616	0.696655	-0.780794	1.59019	1.0741	5.21775	3161780	4774830	3950560	3864340	3394720	4285260	3325050	3121160	5645360	4127890	3564630	7753120	6133740	2771880	1086010	2246910	2251540	8824530	8065010	8207000	6898770
O53486	Rv2042c	Conserved protein	0.337734	0.449949	0.193476	0.219518	0.65911	0.651022	5838950	7051430	7819100	5591660	6391130	9715320	5374780	6387680	9487430	5324980	6666410	17420000	10800800	6445490	8171220	11906700	4078740	8120670	12063900	12630400	5016980
P96874	Rv3269	Conserved protein	0.336906	0.128984	-0.382868	0.216595	0.311897	0.193264	106061000	122151000	147439000	109749000	218540000	152436000	134059000	88088000	244967000	107431000	63946900	231214000	311124000	53356800	152266000	161128000	29061700	96742200	266635000	236083000	62201200
P9WN93	fumC	Fumarate hydratase class II	0.335181	0.486005	-0.047086	0.0992424	0.485701	0.918659	82263200	82553600	97306000	71462800	64220800	95905700	117842000	94823600	114852000	89666200	75654700	113465000	118235000	65492900	86124600	102819000	73680900	81241500	117278000	130706000	113916000
P95206	Rv0398c	Possible secreted protein	0.335047	1.44474	0.143354	0.0887554	0.789873	0.232463	475769	723819	783987	285861	809174	624396	635983	3747000	636911	967571	539668	NA	NA	702424	NA	1148140	317503	1001040	1198090	1365860	433060
P9WIL5	panC	Pantothenate synthetase	0.332085	0.136827	-0.99063	1.59019	-0.641367	0.742395	4287780	6653230	6115500	4538450	11500700	7017480	8565540	5185660	9354990	7395600	4156700	12446700	9428110	1245110	4581140	4264470	2432110	2651080	5750880	5424850	3105990
P9WIM7	pra	Proline-rich antigen homolog	0.327059	1.47497	-0.439478	0.257189	-0.364716	0.135773	32343800	30417400	26436000	32731600	13416100	29594000	18526700	26237700	31752100	37850600	36398000	67644300	62805200	15075400	19487500	24157800	31789800	17437200	20844600	25122100	29197700
O53240	Rv2991	Conserved protein	0.326777	0.566603	-0.360083	0.0703233	-1.99467	1.33262	4682210	4489540	4416020	3457980	3394180	5896870	5294570	5748280	7707040	5630820	4736430	5190910	NA	2158760	4837020	7132320	1488710	891884	3044220	NA	1126540
O53581	cut6	Carboxylesterase/lipase Culp6	0.325908	0.658462	-0.141027	0.0810898	0.0146694	0.025334	7146210	7970490	6938400	7938020	3451890	5419320	5858930	9432100	7961820	11418400	11482000	6273780	4658380	7160270	1851720	5424230	12287900	7967870	6050750	4171280	10009100
P9WFA7	vapC10	Ribonuclease VapC10	0.325423	0.0840751	-0.134075	0.0129461	-0.243769	0.0436092	20367100	32665100	66522000	24828900	33288100	59776800	20249300	14775600	53020900	28839900	20823600	93746400	65748400	9319880	68884800	49187300	10345100	10440100	44469500	54804000	10704200
P9WI97	phoU1	Phosphate-specific transport system accessory protein PhoU homolog 1	0.324305	0.278079	0.327072	0.240038	-0.203359	0.0708432	9675490	18656200	26595600	11601700	16327300	24840900	22237900	9674950	36227500	14566800	9643010	32150600	65555300	7138780	38871100	36483900	10323200	5704580	20556000	20975900	11850800
O53701	Rv0366c	Zeta_toxin domain-containing protein	0.323845	0.441013	-0.627475	1.0638	0.171289	0.229561	1603990	2108750	1407050	1340280	2328720	1660900	1847630	1955910	2796800	1473350	1262980	3261380	2201860	937009	854505	1213220	1335430	1324860	2888250	2415700	1273190
P9WJE9	eccE1	ESX-1 secretion system protein EccE1	0.321473	1.3205	-0.257682	0.415415	-0.233695	0.00404587	10948200	9240880	8790970	10681400	5439250	7974540	6921950	10991700	9530380	10978800	14724500	10964000	12112200	10007800	3813970	7739990	6966090	11471000	7409930	7542700	6888540
P9WNH1	bpoC	Putative non-heme bromoperoxidase BpoC	0.320059	0.658462	-0.550661	1.30452	0.219713	0.66286	25005100	26053600	28951500	26847800	37593900	28455600	29707700	28615900	44961500	29515100	22065900	42462300	41531800	19362900	17330500	25646300	19490800	31325200	41310000	34948000	30513500
P9WPD3	citA	Putative citrate synthase 2	0.3198	1.21208	-0.452473	0.731617	0.111239	0.290361	25972800	26874100	28185000	23431300	29323800	27931700	26769700	28804400	41223800	29037400	25110900	47185800	38048800	19038900	18192500	28091700	20239700	25653400	32403000	36264600	24885700
P96825	Rv0148	Putative short-chain type dehydrogenase/reductase Rv0148	0.318424	0.658757	-0.162866	0.902373	-0.185058	0.42888	73231900	78828500	102425000	72421400	55328700	95820900	98640300	79803200	94456200	102137000	84404400	142427000	104319000	68047100	33394800	72779800	84116700	55212800	70074800	68602500	83777100
O53874	Rv0862c	Conserved protein	0.317632	1.67859	0.24746	0.623659	0.0215929	0.0353437	2917670	3680800	4017630	2966520	3959510	4181270	3216740	3944220	5648960	4127930	3713950	6537120	5046710	4412750	3240350	4844480	4326320	3822010	3776800	3319580	3695810
P9WPH9	eccA1	ESX-1 secretion system protein EccA1	0.31629	1.18071	-0.150177	0.0935441	-0.563558	0.186328	17169200	15325700	15470800	16436400	6921330	13259300	11792800	23968000	15702100	22462700	24703700	12655300	13760300	18683200	4620650	15203200	12418000	14550100	10087800	10651900	10014800
P9WNN7	echA12	Probable enoyl-CoA hydratase echA12	0.316229	1.33432	-0.063273	0.119647	-1.8703	2.35852	3221300	3569220	3520260	3023080	3100110	3277850	2229460	4996460	3715400	2754080	4209610	3811890	6193400	4073400	1301910	3378990	2787160	881081	923322	NA	746671
P9WG67	trxA	Thioredoxin	0.315594	0.0755612	0.341112	0.180554	-0.0145766	0.0301518	200590000	300017000	331697000	232755000	575553000	461163000	508974000	197526000	611330000	319502000	161756000	506108000	871747000	208360000	634913000	631983000	193792000	170519000	521510000	419786000	236939000
P9WFZ1	trmI	tRNA (adenine(58)-N(1))-methyltransferase TrmI	0.315298	1.24365	-0.0281935	0.144355	0.246382	0.544206	5796390	5532140	5680720	5694540	5177250	5581690	5237270	6118970	7604430	6166530	6285810	9752500	8276010	7364640	2562930	5198850	5748490	7164590	6442320	6800000	6239350
O06194	Rv2619c	Conserved protein	0.313387	0.340898	-0.151192	0.0937611	-0.20132	0.135773	1754380	1460830	1854990	1170220	1926820	1654680	2635780	1865730	2804670	2362660	1997400	1023890	2871990	1985150	1073210	1174510	3073580	1478720	1573040	1099170	2525430
P9WPI3	eccA3	ESX-3 secretion system protein EccA3	0.312781	1.6334	-0.409306	1.59554	-0.197393	0.130963	26320200	24005400	28309600	28133900	13726100	24108700	19222600	31135800	24709400	29504400	37383300	30386400	26819700	20097100	9595390	19086400	17220600	24228600	20259300	21577900	20473700
P9WFL3	Rv3193c	UPF0182 protein Rv3193c	0.31271	0.55783	0.0720328	0.0683896	-0.0477582	0.0607158	23245100	21435500	20938800	26627000	13156000	19783800	20036700	26056000	21746600	28569900	29622400	20987800	25957600	30278700	5573940	22143600	21878000	27621300	19602900	20911100	18190300
P9WMM1	hisH	Imidazole glycerol phosphate synthase subunit HisH	0.312661	0.648986	-1.02169	0.025631	-0.0741249	0.00167311	3239540	3517740	2918350	2548030	1739230	2341310	1304360	3909050	NA	859947	2420240	51889200	NA	2003250	NA	NA	506757	2987770	2622290	2218550	1069810
P9WIK1	cysD	Sulfate adenylyltransferase subunit 2	0.31235	1.47497	-0.719767	1.88922	-0.515922	1.09248	5056510	4279260	5059090	5286240	4784320	6196120	4511850	5315430	7139150	5257170	5418480	10258900	7339650	3495420	2840060	3300520	2299040	3167380	3917290	3905120	2882020
O50431	fadH	Probable NADPH dependent 2,4-dienoyl-CoA reductase FadH (2,4-dienoyl coenzyme A reductase) (4-enoyl-CoA reductase)	0.310941	1.068	-0.18342	0.353475	0.110431	0.152085	13424600	12439900	11948800	13596600	11219700	12908700	8657160	12605800	17245200	12476900	13618600	21040500	17254500	12508100	5858090	13335200	9401380	14580800	13042200	13816800	9452910
P9WPU9	atpG	ATP synthase gamma chain	0.310797	0.973743	-0.316173	0.390358	0.160012	0.260608	53310200	53802300	59807300	50620100	58851900	61942200	61027100	65443400	88991600	57688200	54424600	97387500	80555500	41944000	52595400	60213100	26115600	53007000	78503000	80471400	35510500
P9WML9	hisB	Imidazoleglycerol-phosphate dehydratase	0.310046	1.0281	-0.316077	0.501113	-0.87846	0.799799	4561640	2266250	3717480	4468660	2646250	3070330	3743250	6070240	1972570	4176640	7669350	3930740	5040830	3906780	468800	2869070	3103070	2148550	2092120	1952110	1486420
O05781	Rv3104c	Possible conserved transmembrane protein	0.309107	1.59883	0.0816516	0.28496	0.0802839	0.200205	5683710	3947610	4915700	4711010	2534950	4362960	3523080	4811410	4839780	5971120	6921570	4758000	8496150	4996950	4237070	5447610	3899570	5439930	4585640	4639630	3919310
P9WP01	punA	Purine nucleoside phosphorylase	0.308714	0.296294	0.266414	0.251611	0.218766	0.0684128	1869070	2421170	3503750	1254020	4317090	2729390	2897980	1547360	5062140	2114400	1162550	4646860	8584450	2740770	3825130	4619680	1985420	2028370	3830070	3562760	2789830
O33272	Rv2969c	Possible conserved membrane or secreted protein	0.300515	1.31438	0.0918592	0.0602256	0.108127	0.205766	25116900	22147800	27905800	28191200	8515410	20846600	24471900	27172500	31203500	42921700	40616400	24788200	29074900	27315500	8104330	24846000	29408400	26292600	24964300	26746800	26460400
P9WF49	vapC47	Ribonuclease VapC47	0.299309	0.175122	1.09171	1.44549	-0.465634	0.0798263	4193320	8742590	9412890	4762790	18232700	9175750	7347770	6438940	9680470	4399600	11836000	19321500	22222700	8128180	29137400	32370400	6387070	3744380	9385800	8816090	3845850
P9WJQ3;P9WJQ1	narG;narX	Nitrate reductase-like protein NarX	0.299041	0.79198	-0.0204419	0.0612831	-0.36196	0.305875	1105610	610908	1223930	976301	NA	557292	609945	959486	993299	903119	2615800	NA	NA	904474	NA	651169	782439	630740	604278	393678	727244
P9WFH1	Rv3399	Putative S-adenosyl-L-methionine-dependent methyltransferase Rv3399	0.298814	0.427034	0.932899	2.06895	-0.569552	0.983253	9827530	10027200	11937800	10646400	10794200	13726200	17016000	10986200	14653200	10710400	11903400	21681800	19317600	18860500	13200300	23417600	22354100	5524950	7810960	6735870	10652200
P95159	Rv1855c	Possible oxidoreductase	0.298812	0.454484	0.190899	0.391407	-0.0856307	0.00632963	15051700	28475600	39332600	19567100	36794900	34838400	36188800	20877000	58275700	27435900	18548300	69291000	93626700	16855700	67779000	55552000	23982300	12433600	36698700	39552700	28962800
O53298	Rv3081	DUF6036 domain-containing protein	0.298054	0.221766	-0.709215	0.61189	-0.543353	0.171439	2060200	2665820	2627820	2380070	NA	2768390	2839130	1869650	4624830	1572430	3224450	3284000	3961100	1460110	NA	NA	1777760	3272810	2201630	1318780	1430730
P9WFH3	Rv3787c	Putative S-adenosyl-L-methionine-dependent methyltransferase Rv3787c	0.297769	0.231685	0.0427074	0.132992	-0.779485	0.476614	680272	955650	1029340	857268	1985040	942499	1021540	NA	NA	831576	1300460	1917270	1048990	818455	1100760	1803370	867965	NA	NA	643001	470474
P9WN83	gap	Glyceraldehyde-3-phosphate dehydrogenase	0.297708	1.86453	-0.169407	0.784839	0.176282	0.68988	112104000	106466000	110862000	118044000	83240400	112652000	105482000	138617000	137775000	153161000	133405000	115292000	134766000	110509000	52534600	105431000	91727800	131478000	135441000	119063000	104016000
P9WPA1	coaX	Type III pantothenate kinase	0.29641	0.863307	-0.553523	1.37753	0.167122	0.389156	4775150	5406800	6295590	5552920	2627400	6276850	6240330	5351420	6787400	6983850	5097550	9280210	6851510	4428460	2108310	4224240	3342770	5960130	6789820	6509690	5091390
P9WLQ9	Rv1836c	Uncharacterized protein Rv1836c	0.295723	0.405779	0.00482474	0.321028	0.103488	0.0861965	24934700	19150100	18854200	24346700	13821100	20769100	18719100	27217400	19796100	27916200	28629900	13711700	19106100	24160400	7049970	19162000	19266500	24803400	21312300	19836200	18756200
O06553	Rv1155	F420H(2)-dependent reductase Rv1155	0.295653	0.0503658	-0.025572	0.00632459	0.0993754	0.0200138	9423620	15647100	14689200	11476500	28974500	19588500	15246200	11915200	25667200	14824000	6554190	28101400	22603600	8814680	21142000	24970300	4011850	10558500	23305900	22108300	7291720
P9WFW7	alaS	Alanine--tRNA ligase	0.292926	0.839815	0.204228	0.134891	-0.047591	0.140196	13652100	11999900	11987900	12674300	6701400	11418400	10148300	18496300	11785500	17587800	20078400	10348700	11020000	17795300	4790430	14042800	13579000	17836400	10291500	10577300	12620500
P72043	Rv3777	Probable oxidoreductase	0.292735	0.910484	-0.0501885	0.111055	-0.0322348	0.0546921	6161450	7347600	8967660	7150950	6468330	7738990	5428420	7176230	10713400	7285860	5979600	15619000	10233400	7040570	4512250	7966330	6772350	5487800	7134730	7264080	6851160
P9WGT7	pstS3	Phosphate-binding protein PstS 3	0.292717	0.200211	0.558729	0.228753	0.534638	0.348092	18738400	15755200	15641800	21002600	9268840	15130700	21096800	18850300	18037500	26481900	23279400	15494700	19748200	24114000	2588590	22299900	46840800	27809200	17130000	17836100	38325100
P9WID1	pgk	Phosphoglycerate kinase	0.292093	1.40796	-0.104789	0.239092	0.278339	0.880101	66489800	60973100	63948700	61419400	54602400	66498800	60952000	72576300	83145600	74052400	68622300	84705400	76353300	68242900	39691500	71148200	45989900	80194200	81432300	68784400	58111200
Q79FJ2	gnd1	6-phosphogluconate dehydrogenase, decarboxylating	0.291744	1.18634	0.32922	1.92181	-1.44571	3.07845	1691350	1919430	2329490	2204360	1742080	2556990	2196060	2547660	2626200	2360570	2945160	2750280	3133780	3105460	2412510	4004870	1871630	703082	940662	909313	389337
P96265	lpqM	Possible lipoprotein peptidase LpqM	0.291221	1.07792	0.335911	0.0983768	-0.117473	0.0669385	4201160	3007890	3509920	3850190	2024810	2778290	1922920	5137610	3755360	3606000	5407310	2514500	3482150	3796480	NA	2337190	4081260	3795090	2108710	2474160	3071190
P9WIM1	pafB	Protein PafB	0.290545	0.488665	0.498472	0.541199	-0.0112057	0.051433	5741220	5948250	6238750	6053210	7018130	7779270	6938110	7048540	7630230	8483300	7659720	7631030	6805270	9282950	4123050	8712800	8914370	6737470	6510960	5853160	5870000
O53222	Rv2517c	Uncharacterized protein	0.289128	0.26847	-0.21127	0.00477983	-0.381218	0.0839878	1068480	1906790	2206700	2216750	3502890	2447800	1551170	1179320	5272830	1229940	1214410	4990490	4162800	679694	2755200	3409350	1056990	656349	2285150	2699690	1103410
P9WPV3	atpFH	ATP synthase subunit b-delta	0.287182	1.14505	-0.364492	1.22343	0.291198	1.43026	72921300	63793100	63303500	67855200	59849400	75176100	73848200	78606300	87607300	80470700	69102900	88513800	85130500	57567900	39668300	66573900	47844100	73098400	100037000	92964400	65158900
P9WH05	deaD	ATP-dependent RNA helicase DeaD	0.285825	0.689638	0.639079	1.77071	0.766691	1.51307	3846980	4690230	5122090	4314930	5620090	4594600	5087770	5418590	8940310	4652530	4664120	9798330	6017200	5751200	8811260	10749100	5797260	5548730	9859900	8779670	7179900
P9WHK5	pyrH	Uridylate kinase	0.285313	0.5866	0.234506	0.176649	0.632123	0.499167	18290400	17664300	22078000	13653700	24520900	23811100	24618700	21945100	33560400	17337500	13771500	31866700	63515300	14937100	30593000	27997900	23951800	17191400	33396800	35038100	40024700
O53432	Rv1084	Conserved protein	0.284336	0.42217	0.17394	0.0703163	-0.770418	0.482345	2665770	2720290	2453350	2363600	1503010	2096920	2021370	3668290	2133740	2878510	3204680	1417770	NA	3772340	831004	2307620	3025300	2245320	1036790	1243000	1528310
Q79FX8;P9WPB7	cmaA1;mmaA4	Cyclopropane mycolic acid synthase 1	0.283674	0.885608	-0.277621	0.126688	-0.484548	0.102063	8138770	4608100	8786920	7218070	509979	6765470	7335230	8844900	5656710	6306060	8728080	10262800	12575200	3921440	3200540	8255330	7987660	5568520	4115370	4749290	9181420
I6X7F9	Rv3488	Transcriptional regulator Rv3488	0.283329	0.0172459	0.301072	0.0463604	0.285707	0.0418767	6062320	9228780	12347500	7061700	8154150	15379800	18583500	6291660	18919200	7686250	5078360	19549500	14776600	4225910	15164400	17583100	7576420	3711080	14761700	11645900	10854000
P9WQH5	accD6	Biotin-dependent acetyl-/propionyl-coenzyme A carboxylase beta6 subunit	0.282257	0.707048	-0.715443	0.65671	-1.11582	0.760859	51740300	43049600	39397100	47889400	24893700	35089300	35239200	68356300	34577300	59477300	65861600	31279000	36344000	46340600	9616790	29692000	18295100	39139700	16951500	19103600	17254200
I6Y4R2	fadE9	Probable acyl-CoA dehydrogenase FadE9	0.281981	1.15863	-0.184653	0.321634	-0.330833	0.337615	5055000	3532590	4438120	4538970	3361370	4265830	3894180	5741060	4134990	4967470	5405860	4556760	5487740	4808010	2224620	4408720	3097950	3556670	3226660	4328330	2893290
P9WFB7	vapC3	Ribonuclease VapC3	0.281651	0.412954	0.271333	0.317192	-0.226452	0.0330009	955398	1851380	2134400	972953	4264990	2341880	2463670	1759550	3325620	1267740	1863470	4800040	6596640	1330580	4551850	3821530	1169260	1752150	1896540	2670740	1233020
I6XF25	ceoB	Trk system potassium uptake protein TrkA	0.281523	0.351007	-0.293671	0.140246	0.225858	0.207674	30280700	41389800	47796600	29883100	60288100	53279400	59617600	37733000	82782500	46983300	26552700	84210500	69208100	29814600	45756500	53118400	32230700	38352100	66045300	60937900	50855700
P9WPZ3	argJ	Arginine biosynthesis bifunctional protein ArgJ	0.280314	0.786534	-0.55989	0.955068	0.66565	3.7779	9596260	6633550	11285200	8097030	9411060	10549200	8367770	8508730	11116600	11742100	8195440	13737800	14872300	9082550	5590870	6478950	6289110	15813700	14043500	16042900	13112000
P0CL62	mazF7	Probable endoribonuclease MazF7	0.278644	0.292208	-0.26953	0.177415	0.0628587	0.0461702	2857900	4106350	3513540	3377820	5977850	4995000	6585610	9437210	5245670	2759240	1617790	4716780	5620290	2556250	5394180	4256920	1606710	2736540	7110260	5841900	2475000
P9WG57	thyX	Flavin-dependent thymidylate synthase	0.27829	1.02913	-0.17682	0.180554	0.25391	1.1059	5901650	5363240	6376330	6370150	3489420	5783350	3935710	6081170	7656320	6670830	5407790	7356760	7530180	6034090	2883140	6097080	4198400	7065900	6726630	8005060	5233960
I6X5I7	cysG	Uroporphyrinogen-III C-methyltransferase	0.278227	0.49521	0.0258359	0.0493773	-0.446	0.662026	1276370	1143190	1074280	1613610	NA	1366500	704042	1554740	799188	1519520	1414690	1213680	1654840	1317860	NA	1231640	699819	1019460	851451	924688	807595
O05453	esxD	ESAT-6-like protein EsxD	0.277971	0.262715	1.06507	0.555746	-1.01718	0.2908	1590230	6508910	6931940	4089670	27095300	14319700	15343000	971723	8404900	4025230	NA	10833900	8538380	1745810	43160200	20032900	8974090	NA	2114590	3424930	3866580
O06178	Rv1532c	4HBT domain-containing protein	0.277744	0.614775	-0.167693	0.0131742	-0.0807323	0.0167296	3868570	3680380	5051590	3780080	5793750	6504950	6613920	5180080	7067980	4271300	5082370	11976200	8478240	3007100	5987410	7015340	2656790	2820290	6436090	6327750	3225590
O53336	Rv3190c	Uncharacterized protein	0.27749	0.389091	1.12853	4.21516	-0.556259	0.365556	740532	1070940	1421630	1097900	655021	941407	648602	1003530	909978	856827	1689700	1278600	1466710	2328630	1787880	2939100	1398620	603787	676646	852909	277090
P95075	fucA	Possible L-fuculose phosphate aldolase FucA (L-fuculose-1-phosphate aldolase)	0.276901	0.202007	-1.5271	1.65128	-0.616329	0.67522	1934740	1433480	2239120	1488350	3262220	1630230	1905880	NA	3476890	1046030	NA	1680000	2938290	487172	NA	661293	1099900	642293	NA	1671500	1243260
O53830	Rv0818	Transcriptional regulatory protein	0.276303	1.26591	-0.551464	0.725649	-0.800868	1.1059	19382500	22313700	31161400	19706700	32595100	29624500	29048600	35364100	39013700	27031300	25309300	40837500	34996700	16226900	23414400	26676800	11732200	12948400	24156600	20399600	11525900
P9WJK7	mutA	Probable methylmalonyl-CoA mutase small subunit	0.275238	1.23111	-0.703855	1.0812	-0.443911	0.221569	4978420	4452770	4607980	5079460	3977430	4629440	3555410	7048900	4872060	6382250	6281040	4250680	4619550	4693110	2150830	2976270	2681680	5393520	3318410	3456600	3005740
P9WKV3	lprQ	L,D-transpeptidase 5	0.275203	0.856815	0.604465	3.42873	0.413302	2.24895	3115930	1509520	2815840	2946970	2473780	2781640	3048290	2694420	4032100	3580930	3276380	3538880	2653880	3806390	3541920	4756100	4870150	3640300	3704240	3795640	4472420
I6Y8I5	Rv0712	Formylglycine-generating enzyme	0.275202	0.107541	-0.240431	0.364622	0.128388	0.170445	4757380	3546150	3322560	4339950	2523480	3401050	4098240	4326240	4291420	5556410	4164220	NA	1582740	5086180	1145690	1680510	4323070	5963520	3268800	4169970	3582420
P9WIZ1	nrdR	Transcriptional repressor NrdR	0.274682	0.229	0.512184	0.945351	0.0535903	0.0987505	9205030	9424970	14074700	10508100	18128500	17080000	16432800	10647300	20338900	13714200	11218600	25669300	25970300	11543500	28603400	35596800	8973100	8670420	20248400	22626700	8966300
O53671	Rv0249c	Probable succinate dehydrogenase [membrane anchor subunit] (Succinic dehydrogenase)	0.274562	0.12977	0.153901	0.00490118	0.0956002	0.0454874	4431420	2145700	2678320	4258780	NA	1551840	3037940	3468000	NA	5043000	3457270	2542200	2469000	3179880	NA	1655950	5282040	3862230	1059050	2245650	5220010
O06237	lppL	Probable conserved lipoprotein LppL	0.274558	0.688915	0.228384	0.914727	0.0885721	0.130963	3706180	1632490	2770020	2239620	2777780	2049520	3244370	4013790	1588550	4227970	3350680	2944440	NA	3547060	4494790	2820850	2943220	3702980	2216280	2757980	3132840
P9WMS5	Rv3376	Phosphatase Rv3376	0.274417	0.156848	0.370006	0.507925	0.707118	1.19969	11291500	12422300	12629900	12695400	17861300	14164700	16602500	15959100	19945300	12511500	10863900	14751200	19674700	12761600	20052400	24678000	12366500	12570900	31810900	24553300	16898200
I6X4S7	tesB2	Probable acyl-CoA thioesterase II TesB2 (TEII)	0.274404	0.884625	-0.12341	0.264105	0.139638	0.670358	13933500	17404500	18921600	14399700	20771400	18593400	17098500	20172000	23480900	17117300	16323200	21929300	23716800	14706500	17248700	18542100	9925920	17801700	20544900	24676700	17238800
P9WML1	Rv1262c	Uncharacterized HIT-like protein Rv1262c	0.27343	0.0947869	1.3286	1.46853	0.123287	0.0558111	1704650	3669550	3499830	1569320	7320990	3768740	3953110	2010830	6582240	2288370	1944540	7096830	9889130	2883060	15549700	16581700	2464630	2193430	5800420	6980960	1349800
P9WQ99	amiA2	Putative amidase AmiA2	0.273179	1.47611	-0.475009	2.04448	0.294347	1.13425	12449600	10171700	10737000	11220200	8674320	10699000	10618300	11277800	15322500	11240100	10508700	16102500	14581000	8389240	6188440	8841350	7005810	13100700	13216100	13140300	10931400
P9WJ99	iniA	Isoniazid-induced protein IniA	0.273052	1.62237	-0.332799	0.327889	-0.236125	0.294125	7554300	6819250	7369040	8174830	5991180	7094500	3933160	7537530	10576200	8152540	8187100	11917500	8958340	6744560	4325560	7269320	4521430	6064140	6460310	5982640	3297950
I6YF40	Rv3075c	Conserved protein	0.272734	0.686281	-0.345914	1.41204	-2.25998	5.73686	27335500	27544600	28445600	26740300	27461000	29980600	28561800	36198000	26648900	39304700	34446700	22645000	32106300	26655300	9772760	25978700	17366000	5863820	6176500	5637420	5219790
P9WHN3	purA	Adenylosuccinate synthetase	0.271924	1.03162	-0.265181	0.280909	0.292183	0.477544	12268500	10972100	10587700	10343100	12265200	11602700	10948700	12640600	18175400	13622400	11084500	14563100	12873400	9277110	8982530	14092000	7012220	13497600	13372900	14175100	9380960
O07178	Rv0457c	Probable peptidase	0.27006	0.680732	0.00336242	0.205543	0.0233147	0.0839878	5342010	4307070	4553140	6118510	2557450	3915770	3712250	7185940	3744970	6284970	7755100	3782560	4102460	6879260	NA	4317120	2788880	6491900	4484360	4270120	2913780
P9WPX1	hom	Homoserine dehydrogenase	0.269287	0.575924	0.271589	0.0678318	0.238962	0.349768	31171400	25540800	31325300	29978300	16416600	26958500	24703500	35921300	26675900	32847700	35438100	32133700	27220700	38919700	10733300	30191600	34893600	35919100	31198700	28373400	32431100
P9WF11	nnr	Bifunctional NAD(P)H-hydrate repair enzyme Nnr	0.267888	2.10509	0.306463	0.881472	-0.269191	0.597201	3034970	2697480	2836200	2946310	1929550	2870930	2674390	3214070	4072670	3931080	3006630	3488800	3341020	3511700	NA	2724190	3507450	2628420	1981450	2078450	2847260
P9WP19	dapF	Diaminopimelate epimerase	0.267446	0.320064	0.268753	0.0612831	-0.0918589	0.107164	5621870	4652680	5797070	4396870	3903030	3933290	5721190	6591680	5242330	6683840	5958300	3510930	3569240	5623360	3084200	5587420	6643920	4355060	4216880	4376280	5558780
P72062	Rv3796	Conserved protein	0.267242	0.560321	-0.0383223	0.153532	0.00518837	0.0474331	2496190	2575040	3576900	2594080	NA	2576540	1761850	2597740	2740300	5043780	3132920	3067030	3230030	2000770	NA	2508270	2603500	1331620	3500090	2444000	2726140
P9WKD5	Rv2149c	Purine nucleoside phosphorylase Rv2149c	0.267014	1.26033	0.21116	0.251263	0.121447	0.173962	4538670	3871810	3969320	4610880	4674370	4057630	5018070	5391150	7074070	5531750	5017350	4661800	7032840	5658760	2856110	4849340	7335670	5029160	4845400	4289240	5716020
P9WIV3	nusA	Transcription termination/antitermination protein NusA	0.263628	1.26033	0.0362515	0.0416373	-0.145111	0.00915545	13272300	11267100	13539600	12294600	8712570	12102100	9731380	16397700	12827500	14428400	16616800	14039500	14628600	15547700	5663730	11625700	13194400	14239900	10212700	9824070	11675400
P9WKU1	Rv0498	Uncharacterized protein Rv0498	0.263461	0.357707	-0.411253	1.72095	0.159413	0.0256548	1210530	1352680	1246740	1370870	2075200	1122320	1102850	1554980	1513370	1111640	1173530	1479690	2260070	937511	509749	NA	1078700	1345540	1395270	1389530	1408230
P9WQ59	fadD28	Long-chain-fatty-acid--AMP ligase FadD28	0.262753	0.647686	0.810875	1.21094	0.264227	0.437193	37176800	34355500	35771000	36281500	16257300	30029800	30524800	51364600	30912500	43819800	61535200	38617300	35367400	77703700	19465800	53620700	66917300	60559800	35680500	35553300	46840900
P71923	Rv2425c	Uncharacterized protein	0.262739	0.354597	0.228457	0.779162	0.11611	0.102354	1399920	2149650	1474870	1699240	1229800	412931	581382	1600020	NA	1679560	1717840	1249410	1987270	2261370	1018870	2941240	873556	1438400	1596090	1735820	750270
O53670	Rv0248c	Probable succinate dehydrogenase [iron-sulfur subunit] (Succinic dehydrogenase)	0.262671	0.953232	-0.878787	0.952051	-0.522268	0.138466	40113600	40490200	36099600	44031900	18677600	30065800	25188600	60226300	35999200	50618000	60539000	25121300	32023700	32408600	6108970	22778800	16484900	42164800	23941900	26328700	17529000
O06159	bkdC	Dihydrolipoyllysine-residue acyltransferase component of branched-chain alpha-ketoacid dehydrogenase complex	0.260175	0.796652	0.554872	1.10344	0.446787	1.13425	15183500	13019900	15128300	14926100	11156600	14482300	11276400	17423000	15822800	17265700	20857300	21735800	16087700	27010700	8203220	23384200	19165900	22793200	18518700	20960100	16540800
O53565	Rv3520c	Putative coenzyme F420-dependent oxidoreductase Rv3520c	0.258318	0.777598	-0.466313	0.841893	-0.0500754	0.103985	11470900	9421900	11030200	11373600	6702650	9870090	7894660	15364700	8294240	13511300	14638700	8449100	10099600	10018200	3140480	7137400	7150780	13943000	9545210	8613270	9521550
I6Y6S3	Rv0052	Conserved protein	0.25814	0.628754	-0.117976	0.0406536	-0.566383	0.104982	6332790	9786950	11971600	8520970	11718000	13240000	13206100	9156040	23462200	9431950	7935590	18596000	39851900	4148440	16533100	16963300	5062700	3671680	9080780	13039400	6745730
P9WFL7	Rv2295	UPF0167 protein Rv2295	0.258057	0.032772	-0.499153	0.157279	-0.980593	0.2455	1104650	1511050	1413180	1981580	NA	1184090	1027540	1299540	689208	2054770	1806450	NA	NA	2331590	256761	1035800	801826	1526900	NA	658111	326386
I6YGW2	Rv3668c	Possible protease	0.257044	0.0145314	-0.0437232	0.00615733	-0.171482	0.0167119	1997890	2096610	4422470	2079090	2932240	2581740	3222340	3085250	NA	3394690	1299510	NA	NA	2014600	2994740	3611360	1940230	1905260	4674220	2679550	1264460
P9WJ85	mazE7	Antitoxin MazE7	0.256678	0.126478	-0.285806	0.018565	-0.176678	0.0996694	2008600	3286690	3801990	2991360	2758180	4318570	1683840	NA	NA	2311610	NA	NA	4836090	730289	4143950	4879200	763576	2253720	3412520	3039420	196835
P9WI71	pknH	Serine/threonine-protein kinase PknH	0.256269	0.410707	0.219384	0.243512	-0.0546266	0.0197819	8354690	7970340	9552570	8119470	5897700	9630230	5988660	9025560	6338950	10404200	10634300	7576180	10370000	10849500	5312130	10011300	8894670	9298930	6530390	7304700	8330860
I6Y9U6	Rv2620c	Probable conserved transmembrane protein	0.255553	0.0675203	0.637351	0.15421	0.0459719	0.148151	1283170	655604	713549	1443760	NA	873243	743451	1249680	833179	1096820	1516620	694076	443440	1512830	NA	577733	1257360	1100800	759290	454011	909750
P71787	Rv1508c	Probable membrane protein	0.254689	0.490104	0.197748	0.0341651	0.103265	0.0425574	14082700	19961400	14901900	18635900	5468070	14739600	8527340	9776450	19373600	21285900	6087310	15797400	121334000	7397800	18939100	21522000	14870800	21862500	12799500	17827300	13839300
P9WQ71	iscS	IscS-like cysteine desulfurase	0.253866	0.399654	0.287154	0.267909	-0.81747	1.08185	2511120	2742890	2593870	2492530	1504260	2469540	2665070	3431870	2772110	3312750	3216400	2192330	2088990	4281880	1087210	2892240	3236050	1809700	1287010	713226	1562790
P9WFC7;P9WPL7	cyp141;uvrB	UvrABC system protein B	0.253803	0.899527	1.10348	8.74426	-0.925161	4.58194	3332940	2906150	3439290	3266040	3018410	2809350	2953500	3616590	2779680	3581390	4429390	2991900	3642500	6485750	NA	5600610	6500450	1490270	1509690	1669430	2081960
O06417	fadD8	Medium/long-chain-fatty-acid--CoA ligase FadD8	0.253717	0.388936	-0.51727	0.827562	0.118411	0.0748799	4143570	2505830	5381670	4191920	2555090	3274300	2282330	5271600	3003820	4202080	4738290	2534780	3605650	2849430	NA	1742140	2287730	4660040	2683360	4295260	2813500
P9WQ01	argB	Acetylglutamate kinase	0.253057	0.285383	-0.262174	0.0756098	0.89347	2.48516	12174700	11603100	16166700	9879830	13700300	14128000	16978500	10747100	23703900	11205400	9891030	21448700	24646400	9325060	13522400	17954900	6330230	22211800	28688600	31413000	16443600
P9WFJ7	Rv1481	UPF0353 protein Rv1481	0.250958	0.811809	-0.126714	0.390686	-0.202627	0.00406924	4643200	4254370	4465200	4372190	1426800	4734160	4880380	4652540	4294990	7474480	6010140	5974610	4346470	3879680	1006540	4299810	4797200	3644940	5084060	3522350	4115280
P9WH03	rnc	Ribonuclease 3	0.250456	0.566807	0.72189	1.14844	-0.271179	0.149841	4603460	6205210	6810080	5163100	6862200	7678380	9584130	6771310	16791100	7396070	5382390	8806240	15338300	5468360	16361800	15069000	7395290	3127880	6453720	4832520	7080540
O06614;P71947	Rv1576c;Rv2650c	Probable PhiRv1 phage protein	0.249761	0.471717	0.57393	0.29293	1.36318	4.34195	3839830	1489520	2653910	2780330	2173150	2870490	3809890	3832350	2399740	4760350	5215280	2493640	2779330	3844890	1279940	4432560	4801990	5528060	7375490	6929410	8381280
O05838	Rv2360c	Uncharacterized protein	0.249337	0.0664563	0.133206	0.0361224	0.0654619	0.0607158	4184660	6947330	7490750	5031830	14621400	8711380	12155200	4207830	12600800	5869420	2910680	11938500	13177800	3110600	11579100	10566200	5864430	3563600	10647600	9257680	6419260
P9WL47	Rv2658c	Uncharacterized protein Rv2658c	0.249275	0.0569457	-1.05187	1.77693	-1.02167	1.81067	6494910	6597090	7456630	5564830	8409070	8923290	8566200	4924960	9768430	8560190	6018780	10382100	9165850	3227940	3965380	6205770	1983040	2123030	5620880	5222450	1092980
O06576	ephC	Probable epoxide hydrolase EphC (Epoxide hydratase)	0.247472	0.371516	-0.146679	0.0943188	0.631887	1.73138	6340680	5817950	5293030	5991730	5864500	5807220	5736720	6636940	7390590	5173990	5378220	8190250	7176330	6723020	3788010	7197360	3301280	9059280	8971600	9206090	4503390
P9WNS1	dxr	1-deoxy-D-xylulose 5-phosphate reductoisomerase	0.247382	0.333835	0.431695	0.512462	-1.15681	1.45581	2727850	2790500	2846590	3493070	2135140	2798100	2563900	3740750	3340680	3284250	4350040	2320190	2107590	5193880	1444080	3595140	3932610	1247030	1256070	873369	1805230
O05592	Rv1006	Uncharacterized protein	0.246398	0.645832	-0.218851	0.585091	0.251101	0.294125	17872300	13380500	15755200	16272000	7157010	12704800	14599600	19740300	14897000	24806700	21308700	10903000	13558300	14927100	2362290	10162300	15887400	20588000	13957300	14815400	19935000
O53612	Rv0067c	Possible transcriptional regulatory protein (Possibly TetR-family)	0.245539	0.107839	0.497434	0.674549	0.0561151	0.000234532	2418230	3357370	5320850	2223560	3828940	4931780	5465050	2374730	6151470	2927220	1495780	7421120	9324530	2255530	8054980	11104900	2755650	2007360	5242520	5099000	2862610
O53390	metC	Probable O-acetylhomoserine sulfhydrylase MetC (Homocysteine synthase) (O-acetylhomoserine (Thiol)-lyase) (OAH sulfhydrylase) (O-acetyl-L-homoserine sulfhydrylase)	0.244064	0.486514	-0.130207	0.807113	-0.615017	2.79122	6604950	5356380	6167490	5270140	5551390	5172540	4315650	6257730	6673960	6429650	4260080	5996240	6651480	5816280	3179760	4647270	5140980	3489880	3504720	2881070	3936300
O33268	Rv0338c	Probable iron-sulfur-binding reductase	0.243849	0.93799	-0.227108	0.313825	-0.307355	0.0353437	20719900	17878300	19124500	21229700	6269050	15060100	14756300	27561100	17562800	24778300	33353500	13240400	16081300	19311300	3972060	15140200	15408300	20398400	13291100	13840500	15055200
I6X4K0	Rv2531c	Probable amino acid decarboxylase	0.242831	1.02834	-0.162449	0.134734	-0.947188	0.927889	6772400	5228520	5734510	6845320	3743040	5781490	3893850	8768300	5099650	8004660	8898780	4700130	5566770	6242950	3275520	5798290	4449360	5144350	2830510	3117810	2823740
P9WNR9	Rv3716c	Nucleoid-associated protein Rv3716c	0.242699	0.307906	0.633604	0.240038	0.772052	0.163945	19741100	39847000	46144100	33031600	30084800	58938100	72412000	21159000	121937000	32838400	14243900	61455900	163040000	17270000	91173700	79547700	44092400	23250600	82289400	71938900	64154300
O69663	Rv3695	Possible conserved membrane protein	0.241078	0.20386	0.08107	0.15421	-0.0797353	0.0371455	6501560	4529860	4084200	5505000	4632430	4635070	3888250	4641640	6132820	4789020	5051010	6929460	5898900	8736810	2582950	5017080	4783310	6982030	3881640	4885060	3737340
P9WK11	menD	2-succinyl-5-enolpyruvyl-6-hydroxy-3-cyclohexene-1-carboxylate synthase	0.240332	0.743594	-0.0269961	0.0760621	-0.877493	2.15408	8936950	6624660	8057050	8286120	3512710	6573200	5105510	9438380	6302640	7575160	9012510	6886310	8075790	8132210	NA	4698590	6501850	4207540	3163220	3060470	4048550
P9WGP7	Rv2216	Epimerase family protein Rv2216	0.23824	0.321328	-0.12974	0.371017	0.348266	0.224421	22958000	21147300	22025800	19204400	34533200	23081900	20667500	24612900	29293800	22481600	22313400	37490700	27348300	20667800	19595200	23663200	6934420	22870600	33760300	33208400	9971850
P9WHT9	prcB	Proteasome subunit beta	0.237854	1.07469	-0.0671943	0.50017	0.053944	0.068099	10715800	9580690	13220400	11383500	10880500	11962400	11933100	13379200	12109200	19817100	15400500	13468500	12726400	9829330	4318220	11901600	14420200	11601200	12531500	11761300	11873100
P9WG47	gyrA	DNA gyrase subunit A	0.237807	0.5866	-0.401836	0.64225	-0.467753	0.278121	44310900	39752300	34600400	48635900	18313300	34108900	25695900	49587300	34298700	46679400	55556900	34922100	34458400	41280500	8167550	27207100	25170600	39374400	24034800	26003600	19446500
I6YA21	Rv2704	Conserved protein	0.237094	0.424976	-0.205089	0.136079	-1.49341	1.75853	1751070	1959330	2440930	1660210	3116040	3323680	2988570	2143000	3610840	1963290	1463280	5104700	4851240	1564260	2114960	2975810	2119980	465529	724774	1067870	1009130
O53468	higB2	Putative toxin HigB2	0.237009	0.418784	-0.590817	0.305698	-0.260392	0.0607158	4248150	6750280	7714870	4041650	7740890	9018720	7033520	5372630	14804000	6196160	3883620	15223300	10382500	1739460	7622070	6072710	3267340	2222190	9167530	7191690	4552330
O53910	chaA	Probable ionic transporter integral membrane protein ChaA	0.234015	0.13469	0.54947	0.046951	0.0934807	0.00448033	1238090	1359330	1083050	1371590	NA	997987	947255	1364950	714973	1594260	2129750	778706	NA	1698550	NA	475795	1845810	1786460	888710	576037	1587810
P9WMC1	ethR	HTH-type transcriptional regulator EthR	0.231762	0.111732	-0.056022	0.00324307	-0.296551	0.195821	3258650	5196760	4209420	3319000	9518920	6956740	7218810	3079370	6542010	5662770	3413340	6758780	16959400	1395780	7400430	9836930	2597230	1742530	4003350	5707480	4459020
P9WNB3	eccCa1	ESX-1 secretion system protein EccCa1	0.231343	0.937621	-0.29385	0.0557894	-0.12733	0.0751638	6322640	5265280	5162350	5696680	2515270	4311690	3536190	7064190	5362010	6424810	8920780	5496600	5695640	7383550	1429210	5053680	3368410	6954660	4567590	4884920	3013660
O53161	trxA	Probable thioredoxin TrxA	0.229053	0.354597	0.570349	1.02721	0.630399	0.489734	748278	948083	1620510	1080800	1495330	1945760	1620590	848307	2246000	1259250	1071880	2555910	4094470	1444250	2417600	3605120	2023180	1153110	2712050	2538080	2091440
P9WHT5	Rv2782c	Uncharacterized zinc protease Rv2782c	0.225864	0.673822	-0.822071	1.38611	0.10339	0.329976	5890950	5529120	5886170	5948320	4309490	6254010	4914000	4590360	8290300	6287510	5406010	9723890	7479980	3278320	3380460	4694590	2976690	5484760	7162200	7322270	4930370
I6Y4G1	Rv0690c	Uncharacterized protein	0.225847	0.356363	0.10977	0.145033	0.460439	1.28607	2021230	1450400	1508510	2189040	1782090	1597660	2054540	1757200	2017020	2936970	1706440	2151160	2184170	2010940	710032	1835010	2463450	3067280	2227040	2271600	2632570
P9WID7	pfkA	ATP-dependent 6-phosphofructokinase	0.225397	0.491805	-0.031162	0.0643454	-0.0711293	0.0198293	12107900	12592600	11951500	10469900	6402150	10546500	8767910	13693100	11664200	12995600	13457900	10431300	8898240	13489800	5390830	11744200	8898080	11620800	9783270	10295000	8181260
P9WGS5	Rv2750	Uncharacterized oxidoreductase Rv2750	0.225175	1.21797	-0.280415	0.305024	-0.0214054	0.00448033	8766030	11524900	12247700	8966130	10663700	10782000	10496400	11875800	19102800	12144600	9318650	12785400	14824800	8936930	8199150	11437000	8623070	8469290	10803300	12484100	10210000
P71980	Rv1722	Possible carboxylase	0.225012	0.319505	0.0806318	0.246578	-0.687242	0.727664	9744510	8070310	8558980	8311050	6062690	7225770	6200170	10951500	8607140	10257800	11032500	4685170	6830930	9127870	1010600	8772450	8295950	6338300	3732050	4587850	5436120
P9WGT1	fabG3	3-alpha-(or 20-beta)-hydroxysteroid dehydrogenase	0.224993	1.08629	-0.194238	0.066267	-2.18192	5.04224	11908200	17000200	17034400	16302000	16547800	19003600	15891200	15990000	24229100	19510500	16062800	28859600	19170700	14075500	13913400	19645900	14851200	3233160	5388880	3806400	3487290
O53531	Rv2257c	Conserved protein	0.224581	0.289912	-0.216545	0.151393	0.306753	0.586415	5662350	5447880	6905910	5992200	5571890	6384190	6432300	4708160	10710200	6927740	4814730	9281290	7075290	5302190	5011870	7175860	3654170	5852590	9450010	8971160	5524340
P9WI65	pknK	Serine/threonine-protein kinase PknK	0.224016	1.2367	-0.0469685	0.0381681	-0.538343	0.367636	1920690	1742620	1863790	1965530	1919030	1960350	1631080	3130840	1983320	2499460	3252490	1761290	1934800	2579870	905409	1942710	1772410	1901500	1207140	1435600	1200500
P9WNM5	cysNC	Bifunctional enzyme CysN/CysC	0.220969	0.918766	-0.742445	2.75871	-0.774017	2.02781	7990370	7099040	6765840	7986300	4543740	5942600	6479850	7395550	7189780	8688570	9421470	7309120	8375840	5604510	1820300	3727650	4360580	5505310	3578490	3652940	4260210
P9WPZ1	Rv1496	Probable GTPase Rv1496	0.218818	1.29878	-0.420174	0.0491188	-0.371412	0.21804	2387280	1963030	2423610	2306450	1473220	2328290	1879650	2539790	2106410	2828610	2503790	4152930	2964350	2728070	NA	1506050	1723690	1742950	1822940	2189660	1286110
O53789	Rv0681	Uncharacterized HTH-type transcriptional regulator Rv0681	0.216541	0.0451446	-0.314434	0.119648	-0.338868	0.167495	5179720	7223220	8680230	7215060	6112250	11033600	9397400	4440710	11163300	5697560	3844640	11633500	11088400	3517030	8100310	11795500	2042550	3616750	9167600	7805490	3275530
P9WKK9	leuB	3-isopropylmalate dehydrogenase	0.215978	0.545816	-0.017565	0.183474	0.147682	0.273326	14004200	9776200	12738900	13024900	7174770	11118600	9596990	12590100	11096300	13873100	13238200	10885400	18000300	14174700	4367560	11199300	10768800	14435200	11732100	12705800	11928300
O05877	ppk2	GDP-polyphosphate phosphotransferase	0.214635	0.179645	-0.200094	0.130241	-0.0815926	0.0393406	14722500	16303200	18677000	14738500	15283800	22749900	17199500	13688300	27090000	14132700	11951900	30533800	23704100	8112890	19809300	21548800	8574370	9430160	21697900	20598900	10214600
P9WPU7	atpA	ATP synthase subunit alpha	0.214569	0.859689	-0.429013	0.743141	-0.324649	0.0489533	193491000	161560000	160679000	185334000	66387300	137561000	136019000	230520000	150836000	222054000	240277000	136467000	148097000	159748000	32005700	114838000	123857000	178125000	125255000	125431000	131171000
I6Y7V6	fadD31	Probable acyl-CoA ligase FadD31 (Acyl-CoA synthetase) (Acyl-CoA synthase)	0.214384	0.547298	0.0397459	0.00396355	-0.140047	0.0579797	114055000	104346000	96821800	128814000	58395300	90956000	72670400	133350000	92505400	121878000	154043000	95222100	102789000	145381000	36017200	101465000	97587600	138050000	84861700	88464800	87264700
P9WGI9	glyA1	Serine hydroxymethyltransferase 1	0.213731	0.46253	0.170743	0.113676	-0.0869387	0.0646017	39517600	38621900	41916800	43499700	31810700	39613800	36208900	42658700	41061300	50037600	46405700	51081200	45250100	58410100	17849100	47304800	41660200	52103700	38215300	36197800	33754300
P72041	lipE	Probable lipase LipE	0.213379	0.292094	-0.309151	0.374317	0.399747	0.66442	16280300	16598600	17779400	20821500	16739900	19261200	15409200	15875900	25039000	15185100	15926300	25950500	22890200	13772200	13249900	20392600	10507600	20013300	25595600	24155800	13183000
P9WQG7	Rv0802c	Putative succinyl-CoA transferase Rv0802c	0.212969	0.043732	-0.939644	0.760829	0.16696	0.358633	1817700	2225730	2619660	2236150	2721880	2183950	1370700	2169480	NA	2579780	2739430	2911190	848912	2091620	NA	1071110	1160410	3361570	2342170	2655440	1649090
P9WFU3	pheS	Phenylalanine--tRNA ligase alpha subunit	0.212914	0.15995	-0.520725	0.88172	-0.199887	0.175973	16662300	20261200	22217900	19470400	28355000	25155100	21873000	18114300	29710700	21287100	16518400	29415700	32197500	13977100	16514800	21704600	9917460	15627900	24231400	22458200	12377100
P96883	Rv3278c	Probable conserved transmembrane protein	0.212532	0.451559	0.381005	0.143427	0.222594	0.0103529	4104410	4501580	5499620	4863530	7074540	7430910	6988650	3984210	7162490	5582550	4987080	16694400	14149500	2537230	9672650	8930890	5392860	2754890	6595750	8309550	6238490
P9WIR9	Rv0954	34 kDa antigenic protein homolog	0.211545	0.211368	-0.284711	0.355518	-0.63941	0.396563	112522000	105733000	81454400	119370000	32861600	83690800	68352100	129600000	36461800	68001800	125814000	41790800	176093000	101353000	21880700	61128300	76276300	92049500	26248100	50972400	56482500
P71888	Rv2324	Probable transcriptional regulatory protein (Probably AsnC-family)	0.211406	0.157922	0.581327	0.682796	-0.367577	0.0579797	3152070	5131630	7114440	3986490	11375900	6888200	6337280	3086580	10803900	3870910	3372480	11910100	21289800	2680490	21869200	16283500	2366890	2128860	7235370	6819580	3004260
P9WHU7	proC	Pyrroline-5-carboxylate reductase	0.210273	0.445589	-0.230122	0.17672	-0.0630663	0.107411	10526900	5950200	11186800	9881970	3966660	9465540	8033200	9735840	7851690	13568300	10591900	12367400	11309600	10206200	1554890	5933740	14974300	10405700	7141710	7715650	16500800
O05581	Rv0998	Acetyltransferase Pat	0.210064	0.254618	0.447041	0.607971	0.589563	0.635087	1276960	2485490	2430530	1593970	3145450	2957720	2136950	1611430	5019810	2024260	1149290	5094910	3598720	1850770	4738060	4153500	2473300	2079740	4764300	4427570	2887310
O53379	Rv3329	Probable aminotransferase Rv3329	0.20928	0.452253	-0.265634	0.249529	-0.205419	0.0963478	5990490	7258380	5388690	4685410	3590570	6114850	4329990	6607950	9635070	5851900	3836730	7235210	4183350	5441600	3523380	5985930	2873740	5812150	4588550	4758530	4110300
P71792	Rv1513	Conserved protein	0.208841	0.101145	0.18927	0.0877547	0.398404	0.118146	17192100	25313900	32982800	19862700	26909100	35726700	40925700	21626100	45851700	23387100	16993400	49172600	38813800	15137800	42187200	40119200	21243600	16804500	43950700	36123600	34811400
I6X5M3;O53830	Rv0818;Rv2884	Probable transcriptional regulatory protein	0.208719	0.0153261	-0.512025	1.22124	-0.130648	0.669295	4126190	3785710	5873270	3523980	7383880	6084580	3465500	4101710	NA	4372390	5164570	6453960	NA	2893440	NA	3806340	1644300	NA	3768950	4017320	1670130
O06418	Rv0552	Conserved protein	0.208131	0.421563	0.125492	0.0526398	-0.374425	0.295326	5363460	4729770	5194210	5082240	3183620	4586900	3218720	5603730	5407780	5902420	5519790	3905280	4602880	6447110	2152880	4923300	5395920	4667740	2954140	3474370	3822840
P9WGX3	Rv1407	Putative methyltransferase Rv1407	0.207597	0.478497	0.192921	0.18774	0.353677	0.657313	2344260	2787480	2591720	2733720	3475370	3346300	3298560	2906660	4706370	2697170	2412220	4195020	3531100	2823980	2808090	3626070	3548620	3035100	3758130	3891780	3365630
P9WKI3	guaB1	Uncharacterized oxidoreductase Rv1843c	0.207573	0.473636	-0.291842	0.632264	0.248317	0.243778	25646200	26447200	30476100	25699500	23589300	24352200	27649700	27035500	38194200	32603300	26616900	32317200	26753200	28104100	12207300	27181300	14804400	31567000	29485800	33146600	17952400
P9WKG9	ispD	2-C-methyl-D-erythritol 4-phosphate cytidylyltransferase	0.206309	0.175496	-0.786687	1.08251	0.25438	0.0892404	17117600	21195400	22031100	17280500	37831000	28969100	31760400	15674800	30356900	22085100	12094700	32871200	28750900	12527500	12802200	21462000	12739500	16337900	37144700	32193500	20364900
P9WPI1	eccA5	ESX-5 secretion system protein EccA5	0.203211	0.516893	-0.332636	0.415415	-0.513581	0.212434	6932650	6924920	7540070	8250780	3615100	6585250	4586530	9182640	6762100	9694310	9626100	4860920	5069780	7515400	1824060	5746720	5251220	6840170	5023800	4677760	4107780
I6YB11	Rv3057c	Probable short chain alcohol dehydrogenase/reductase	0.200881	0.58756	-0.898858	0.911068	0.0613774	0.0297544	3744880	4260550	4588930	4884470	3902540	4956380	2982660	4262200	6623440	5078550	4715600	6836550	4557400	2794070	882068	5141960	1775890	4379710	4511730	5160100	2105590
I6X4D6	Rv2474c	Uncharacterized protein	0.2007	0.175558	-0.348253	0.51966	-0.229979	0.386472	18547300	18489200	27624900	15416600	24641300	23137100	18336500	18342900	24131400	18499800	15613200	40664200	24505900	10183100	17143700	23726900	11995400	13628600	16764600	19384000	14864000
I6Y498	Rv3680	Probable anion transporter ATPase	0.199909	0.404429	-0.201344	0.119647	0.0272747	0.107411	8914770	11201200	12336600	10768300	6805710	11475100	8914490	8154930	14140000	10597500	9353100	18894200	14873400	8172340	9487110	15811300	9244130	8158740	13231700	12972700	8974930
P9WII7	pdxT	Pyridoxal 5'-phosphate synthase subunit PdxT	0.198753	0.0196116	0.0926338	0.132562	0.369529	0.39265	4254750	6933400	7986340	5487920	13075900	8751910	10107600	5073710	12708200	7018440	4180020	11313500	12712400	4631480	11482400	13355300	5549510	6189520	15815900	13862400	6773200
I6Y8X0	pip	Probable proline iminopeptidase Pip (Prolyl aminopeptidase) (Pap)	0.198612	0.394812	0.139128	0.167766	0.296991	0.142748	1119230	807011	1207800	680403	777998	957647	1185550	1296050	1323810	1114950	730738	1083030	980008	836037	862477	1351140	1246720	649715	1121120	1231970	1451100
P9WNZ3	desA3	NADPH-dependent stearoyl-CoA 9-desaturase	0.197859	0.325404	0.0615544	0.151575	-0.503983	0.2908	2826880	3530570	3619830	2713470	3330960	4505650	2447880	2442040	4311060	3330130	2411860	5268160	6718780	3447640	3504670	4490240	2446670	2013540	3510470	2684160	1734740
P9WNQ9	eccB5	ESX-5 secretion system ATPase EccB5	0.196829	0.206688	0.0927344	0.118716	-0.158185	0.0516537	27199600	22548600	18837400	25617200	12742900	17990800	19612300	30937700	16957500	28000800	30146000	13107600	16275400	30999800	4566730	16879500	24949200	28229100	13346500	16084400	19066800
P96832	pntAa	Probable NAD(P) transhydrogenase (Subunit alpha) PntAa [first part catalytic part] (Pyridine nucleotide transhydrogenase subunit alpha) (Nicotinamide nucleotide transhydrogenase subunit alpha)	0.196013	0.395716	-0.303364	0.825365	0.051274	0.329976	58118300	49350400	55298600	59481000	43674000	53401700	46822800	62966200	49505500	65031600	65252100	50361800	59380100	59882500	14991800	44538000	42011300	73337800	55258100	55409400	54735100
O53260	Rv3013	Conserved protein	0.195195	0.00153659	-0.0304786	0.206642	0.390718	0.0607158	4536270	5336430	6590910	5203960	12231700	7387940	8100540	4372690	9364870	5726720	4351100	9432130	11821000	3982530	6620890	7494440	6285370	4650430	8709430	8572540	9101550
I6YFP0	birA	Biotin--[acetyl-CoA-carboxylase] ligase	0.193486	0.0823971	-0.197028	0.484457	-0.0692337	0.11347	4055130	3148830	4041750	2774970	1858260	3202480	3558780	3791530	2715190	3764400	3559820	3859630	2428990	4051100	883768	2113460	3473880	3536890	2567960	1912550	4246900
P9WIV7	nuoF	NADH-quinone oxidoreductase subunit F	0.193295	0.202794	-0.507673	1.20585	-0.560158	0.497512	14598000	11173700	14538200	14507600	5944570	12447800	12931400	15022700	9843200	17802500	16225800	6458200	14548100	9072750	2787330	10837600	9118000	11734800	7367870	10173000	6754060
P9WPN9	cyp126	Putative cytochrome P450 126	0.192798	0.323996	0.70034	1.4497	-0.00492046	0.00949773	4403550	4175230	3427540	3876890	2290900	3743750	4421370	4766190	3770650	4500590	4589420	3623710	4361810	6982320	2887740	5725990	6873030	4588350	3137440	3456290	4271090
O53505	lppM	Protein LppM	0.192266	0.0759118	-0.0392057	0.100485	-0.00325216	0.171439	3661840	2637570	2797900	3551130	1691460	2771890	3002000	3631360	1910170	3196760	4001210	1916640	NA	4117630	NA	2722890	1894590	4938150	2654070	2929130	2172890
P71833	Rv0779c	Possible conserved transmembrane protein	0.190664	0.193665	-0.549779	0.554004	0.230594	0.154297	3620920	5109630	4758240	4079550	5069260	4447240	4092950	3441680	8101270	2718400	3255730	6709490	7735750	4135940	3854900	2221140	1338810	4525640	6816680	5910410	1662210
I6YDN6	pepQ	Probable cytoplasmic peptidase PepQ	0.190559	0.212842	-0.212581	0.0637829	-0.0232482	0.0393406	25879200	27575400	31742800	24365600	23269300	31628800	33436100	23559700	47740700	33521600	22461700	38213600	29416800	23012000	24582700	38862300	16635400	22918800	31350400	32706500	16810400
P9WKG1	ispH2	4-hydroxy-3-methylbut-2-enyl diphosphate reductase 2	0.190465	0.622213	0.154032	0.361586	-0.794964	1.32144	7407910	6519330	6247240	6287520	3784160	6240260	5379070	6973370	6102710	6195240	8294040	7674790	7284470	8257400	4285960	8354980	5644890	5071790	3061410	4097500	3103790
P9WIU3	pyrF	Orotidine 5'-phosphate decarboxylase	0.190461	0.297553	-0.695295	0.201708	-0.192744	0.0370214	7046830	13674100	17145000	9332520	18930500	13036700	9165150	8314200	24401000	10719200	7898120	19033900	33302400	4309190	11793300	16780300	3770850	7408660	15404000	15796700	5125790
O06614	Rv1576c	Probable PhiRv1 phage protein	0.189186	0.421992	-0.648639	1.10607	1.09502	6.4908	2793400	2008780	2592670	2328850	1249300	2452140	2490070	2945730	2004480	3249190	3018070	1763310	2645740	2275450	805956	1295620	1832730	4944910	5594700	5531400	3935900
O07431	Rv0187	Catechol O-methyltransferase	0.189091	0.755293	-0.14028	0.368519	-0.176858	0.23857	7590300	8693530	10590400	6684710	12841300	9326310	7604120	10044300	9469750	9777740	9214900	13825400	13242100	7824790	7951240	9386160	5003930	7658000	7723070	10044100	4961010
P9WI85	Rv0181c	Putative quercetin 2,3-dioxygenase Rv0181c	0.188695	0.0755612	0.176794	0.183474	-0.861194	1.75442	1509280	1669350	1540090	1584470	1464450	1354340	1568910	1755290	1106810	1856100	1934470	379964	NA	1740870	NA	1532490	1788440	1009200	1148500	543438	686429
P9WM91	Rv0036c	Uncharacterized protein Rv0036c	0.187783	0.350023	-0.0725458	0.0193478	0.14524	0.119051	25002500	30946800	34975800	27241900	32948600	39087300	43008100	29685600	54558600	32065800	22965700	42991900	87061900	18599800	44065700	51046200	12445500	24149400	55040700	48727300	19092800
P9WIS5	kgd	Multifunctional 2-oxoglutarate metabolism enzyme	0.186673	0.78694	-0.196097	0.480774	-0.535568	0.389112	34673700	31194900	32808100	38642200	14375800	28936400	24826300	42117400	28914400	41771300	47336500	28573700	29236800	30060900	8740340	30898400	24399700	28624700	20897500	22144400	18404100
P9WMH1	ideR	Iron-dependent repressor IdeR	0.186649	0.299946	-0.421154	0.884349	0.282978	0.344607	101444000	97093600	103018000	89943800	101526000	119714000	123511000	117934000	132588000	101016000	113163000	69964000	172085000	75665900	75978800	92205800	53271800	98016200	149894000	149038000	70226600
P9WQL1	pstB1	Phosphate import ATP-binding protein PstB 1	0.186529	0.233306	-0.248534	1.15261	0.220411	0.656817	7185460	6499900	6779370	7428990	5981620	7517370	7037910	5981280	8817400	7811040	5509400	10130500	8207560	5782660	2520080	6065680	7061090	7514610	8640180	9197400	7759070
P9WGL1	mprB	Signal transduction histidine-protein kinase/phosphatase MprB	0.186077	0.286041	0.334131	0.520974	0.0471433	0.0223024	6882470	5121490	5428240	6904040	4983230	6140040	5403660	5211750	5692370	6269130	7829240	8976220	6081920	8783760	4660210	7414610	6271260	7146940	5428400	5788700	4878050
P9WH71	nrdF2	Ribonucleoside-diphosphate reductase subunit beta nrdF2	0.185964	1.01807	-1.02158	3.97526	-0.16178	0.297536	6680400	8246740	7804730	7158200	4172050	7919820	7052740	7813890	8472110	7724850	6816130	9118290	9461040	3612580	2850770	5076780	3439340	6937460	5485140	6659970	6137770
O05773	Rv3094c	Uncharacterized protein	0.185252	0.564756	-0.497063	0.183474	-0.859254	0.109492	1712620	1238240	1337770	1922910	NA	1408850	898525	2294350	1562030	1281140	2969120	1560920	1258550	1474370	NA	NA	471742	1869490	757020	NA	749611
P95146	Rv1869c	Probable reductase	0.184982	0.380031	-0.323573	0.309387	-0.123577	0.0982183	13100900	11879500	13053900	12406000	7066880	11340900	10440600	14468000	12541300	16784100	15291000	11134400	9822550	13787900	3391690	11983200	7002340	18428500	10954400	10854200	6565800
I6X4W4	arsC	Probable arsenic-transport integral membrane protein ArsC	0.184356	0.380031	-0.0335217	0.0321771	0.129103	0.0282833	1052090	494583	1379930	1464020	703313	1383020	1034750	NA	NA	2022080	842838	1195500	NA	769522	1113270	1516170	942582	NA	1150580	1230540	800360
P9WJJ5	nadD	Probable nicotinate-nucleotide adenylyltransferase	0.184116	0.0525409	-0.122382	0.443811	-0.230283	0.525483	2886360	3485680	4106230	2545110	3598360	4326530	7333600	3414860	6198750	3590170	2728730	5328990	4586170	2864840	3809040	3746570	1890890	2795440	3409740	3339530	1867440
O06817	bisC	Probable biotin sulfoxide reductase BisC (BDS reductase) (BSO reductase)	0.18406	0.485058	-0.191459	0.0034932	-0.854399	0.00610285	1759160	2150430	1898930	2499520	708934	1882770	1913580	2157330	1500840	1815990	2446320	NA	94877700	2642850	NA	1662930	1586490	1245760	NA	NA	854820
O06543	mcr	Alpha-methylacyl-CoA racemase	0.182885	0.619495	-0.7038	1.15936	-0.425049	0.220127	9268850	8356390	8945260	8582960	2793250	7791770	8147450	10607700	9380510	9591030	10374400	6144780	7237850	7302990	4000800	4926740	5334120	8515480	5748580	6202730	6245170
P9WG01	sugB	Trehalose transport system permease protein SugB	0.182725	0.228509	0.154988	0.016534	-0.253424	0.175973	4360470	5174920	3755950	3061000	656753	3342400	2387400	2603450	5518040	4159150	4240740	3428270	3346770	3721470	NA	2093870	4310190	3037750	2116480	2570150	3666480
I6XVZ6	Rv0686	Probable membrane protein	0.182585	0.740352	-0.0860696	0.146326	-0.307075	0.0921998	10762800	6675890	8883750	8863720	3291430	9184340	8943690	10572900	8779000	12537500	12750800	7758430	9591710	10532000	2600620	8311750	8426760	9332740	6176950	6292130	8068960
P9WJM9	mshC	L-cysteine:1D-myo-inositol 2-amino-2-deoxy-alpha-D-glucopyranoside ligase	0.182547	0.277804	0.104376	0.303693	-0.0117191	0.0439639	9768430	8381420	7657570	6680460	5336880	5999710	6836680	9085380	6755500	11153900	7615160	5737510	7902540	8458850	2443070	6240410	8821410	9045890	6259780	5275600	7302960
P9WMH3	crp	CRP-like cAMP-activated global transcriptional regulator	0.182317	0.00379055	-0.162751	0.0592317	-0.116384	0.0578433	104101000	181864000	204919000	134381000	162165000	271733000	297758000	107997000	304966000	167684000	86432400	329639000	245040000	67841900	240685000	279911000	84240400	73000400	262070000	221988000	113550000
P9WQN5	mpa	Proteasome-associated ATPase	0.181955	0.297553	0.247388	0.0153374	-0.217259	0.114065	11997000	12084000	10014100	13055800	7167330	9156800	9132340	12929000	9097610	11139700	15183500	11580700	10279400	14585100	3510290	11625200	12149400	12076600	8473590	7709860	8754630
O06311	Rv0361	Probable conserved membrane protein	0.180727	0.0236329	-0.282675	0.195869	-0.262459	0.0921998	8228220	6584060	7862470	9905350	3882360	6939130	5693580	8845810	5421480	9214410	7682030	2263110	8048350	9998130	1019980	8098860	3309980	8504260	5603640	5966190	3348710
O53410	Rv1062	PNPLA domain-containing protein	0.180284	0.0727143	-0.391988	0.435463	-0.525982	0.0909772	2848230	3556870	2758590	2491310	1957310	1878270	1683390	3165740	1937010	2822920	3196110	1302410	NA	1726050	2295190	2071100	965420	3847780	1617100	1843260	901767
P9WJ01	Rv0480c	Hydrolase Rv0480c	0.180144	0.348327	0.435564	0.0612831	-0.0601857	0.0198293	3604930	3110790	4456550	4744210	1701860	3372020	4698710	4137200	4031550	6626270	5900380	3585760	3391200	5209900	825675	4541000	6226570	4027250	2369770	2888020	6295450
P9WPS3	ctpV	Probable copper-exporting P-type ATPase V	0.180126	0.385381	0.0320161	0.0203642	-0.143824	0.00949773	5485060	4689400	4980480	5092020	2344630	4273240	4037830	5537930	4984510	5231120	5815910	5394900	4431940	7119290	1682970	3106630	6482630	5369580	3990960	4114220	4374690
P9WN79	glpD2	Glycerol-3-phosphate dehydrogenase 2	0.179812	0.336421	-0.154004	0.288967	-0.364744	0.119051	9747080	7529710	7178220	10702200	2617910	7850180	3345290	7537990	6272310	9212980	10064900	9332420	7845370	7937800	2006830	7152020	6382670	8314980	4448470	5999460	5695790
P9WGT9	pstS2	Phosphate-binding protein PstS 2	0.179596	0.379364	0.0863715	0.119302	0.324566	0.367636	21846400	13422700	17092600	20241800	7450230	14538000	16623300	19954000	15928900	23424500	24658800	14150700	17700000	23369400	2034450	14369500	20928300	24240000	17275900	17894400	23739900
P96811	ephF	Possible epoxide hydrolase EphF (Epoxide hydratase) (Arene-oxide hydratase)	0.179246	0.431623	-0.182123	0.152385	0.390978	1.86278	8192190	9982740	8728180	7844420	7362860	9344090	9614570	9246400	10519300	8374240	7805300	11677700	11002300	7557490	7828630	9889660	7177270	9976710	13510000	12913500	8527860
P9WNR7	eccB1	ESX-1 secretion system ATPase EccB1	0.178766	0.428387	0.0380801	0.31712	0.221084	0.167972	8335110	6383750	7434790	9253950	5542430	7727500	7317270	8988530	6706340	10968000	11190600	6770980	7842570	9255240	1568070	7015830	8251460	8641070	7252880	9091730	8691050
P9WNR3	eccB3	ESX-3 secretion system ATPase EccB3	0.178538	0.609176	-0.36209	1.21763	-0.183551	0.0578433	30376000	29863100	27539000	33295700	15379400	26339200	24234800	34906900	24417400	37170800	39595000	24957800	27426900	25275000	6047890	20713800	22138900	29865800	23218500	25279500	21457600
P9WHF5	sseB	Putative thiosulfate sulfurtransferase SseB	0.17794	0.235976	-0.259128	0.0361224	-0.218985	0.0568287	5992770	5603980	5394220	4996890	4974070	4582720	2874550	7120350	NA	5011530	6294110	2959580	NA	8290110	4503010	3847720	2331240	5876700	3212110	5325110	3261240
P9WJE3	eccE5	ESX-5 secretion system protein EccE5	0.176083	0.333835	-0.0810021	0.207481	-0.212893	0.0140843	10879200	9867690	8669530	10193000	4846920	8049870	8037150	12890900	7992980	11596900	13087100	7032820	6475300	12065000	2006040	7434170	8958190	11517800	7106320	7152400	7807830
P95160;P95200	ndh;ndhA	Type II NADH:quinone oxidoreductase Ndh	0.175853	0.266395	1.43324	4.88357	0.469327	0.5512	4058740	2953650	3964060	5893320	2072400	4846440	2009890	2754000	4938570	2606180	4017290	8708980	5893840	12100800	9873430	11536700	6371350	6032140	6482500	4944050	3028990
I6YGJ4	lppH	Possible conserved lipoprotein LppH	0.175382	0.0518849	0.0658542	0.153532	-0.0444371	0.0770392	2609810	2570530	4306920	2387560	NA	2752200	2989140	3027560	2234170	3674040	3448370	1502160	NA	1833680	NA	2806220	3789510	1840360	2875980	2323390	4845080
P9WGC5	sucC	Succinate--CoA ligase [ADP-forming] subunit beta	0.175277	0.413992	-0.324954	0.751944	-0.0401921	0.0921998	80140000	69828800	74424200	80645900	42758700	66575100	71813800	98141700	74283900	88286900	87897700	51773700	55871300	72514200	30615800	58193300	56468000	85963100	68283500	71398000	65961700
P9WFP9	Rv2556c	UPF0047 protein Rv2556c	0.174755	0.392747	0.91751	1.54851	0.659285	0.31958	NA	3409800	2818720	4169840	5851170	1832390	5178120	4866380	8837000	3689310	3247900	1973010	10638700	6074650	11449400	NA	7158410	3590580	7793690	4897470	7073050
I6Y2I9	Rv3092c	Probable conserved integral membrane protein	0.17404	0.282372	0.549752	1.64745	0.139112	0.311992	1050550	1543660	1080890	1188370	NA	1188970	564893	914587	NA	1239670	2040100	1320540	NA	2073660	NA	1660910	1327140	1655220	1158460	1273490	1225480
P9WIT7	pyrB	Aspartate carbamoyltransferase	0.172221	0.288635	-0.863585	1.86088	-0.162566	0.269355	4999690	4675630	3766540	3338440	2273290	3457880	3114840	4521330	3516910	3885840	3906780	4741330	3134090	2620840	NA	1743860	1900400	3945250	3728340	2450440	2092470
P9WND3	fmt	Methionyl-tRNA formyltransferase	0.171871	0.0341725	-0.0800599	0.0401727	0.337935	0.142748	6619190	8823140	10107700	7841830	17470500	14426800	12536800	7077600	17263300	9201220	6358770	20027500	13571800	8245840	10878300	14619300	6893960	7002230	17488600	16137400	9413780
P9WIC3	pheA	Prephenate dehydratase	0.168595	0.119152	0.506909	0.101228	0.121827	0.0854733	8992530	7283350	6552670	9308120	3764880	6511330	7212460	9200120	4043860	9663000	12913600	4261470	7012960	13932300	350315	6765050	13732800	11147900	5934530	6998300	8697630
P9WKG5	ispF	2-C-methyl-D-erythritol 2,4-cyclodiphosphate synthase	0.16784	0.133384	0.104171	0.0952637	-0.0599831	0.0425574	2539880	4078860	4884270	2697790	6010520	5168700	3757340	3903200	6655550	2014950	1897950	5260980	9563330	1526990	7607010	5359810	3408730	2282480	4905550	4720680	3104820
I6Y4U4	Rv0794c	Probable oxidoreductase	0.167292	0.388936	0.633357	0.501414	-0.0826494	0.00694542	7298460	6460170	7279130	6946800	4125850	5933050	4786040	10606700	5567080	8941800	10189900	4430520	4350070	11977400	2643600	8505350	11536300	8177420	4304300	5095560	7105400
L7N6A2	Rv0275c	Possible transcriptional regulatory protein (Possibly TetR-family)	0.167239	0.152692	0.819515	1.37197	-0.602173	0.141067	4162350	6031080	4951350	5594700	10401200	5766470	2305980	3991020	6547640	2734020	6017020	14915300	7431300	8286890	11460300	12743000	5452450	2344860	6898650	5026280	2274430
P9WPU5	atpD	ATP synthase subunit beta	0.165638	0.5866	-0.0721627	0.423115	0.0241253	0.0530915	193151000	149166000	167567000	193363000	86203500	165273000	151422000	219383000	164554000	228069000	206207000	133596000	156427000	162748000	51730800	151671000	186149000	178385000	157735000	150590000	183332000
L0T2Z1	Rv0197	Possible oxidoreductase	0.165391	0.100372	-2.03907	0.823227	-0.129806	0.0461702	10514300	16174100	9493320	12560600	19938100	NA	5874800	20414300	11986100	13891700	15760500	5850500	8774830	1171100	4387320	12719600	1227280	NA	NA	20259800	829611
O69714	Rv3747	Conserved protein	0.164959	0.332301	-0.621723	0.351705	0.0415091	0.0109809	25474400	34815200	43961800	29685500	45895700	59194100	22442100	25636800	49774200	28290800	27884300	83879400	99139900	16748300	28504100	39242200	5618330	24906800	58839900	46756100	7509540
P9WQ73	serC	Phosphoserine aminotransferase	0.16384	0.642862	-0.00124259	0.0535016	0.125347	0.110787	38138200	36472700	38505000	38792600	36412300	39896700	40740200	43931300	52652200	53553600	40734600	37676600	42340300	47834000	24252200	51516100	29109700	42028100	41972100	44340500	30601600
P71590	fhaA	FHA domain-containing protein FhaA	0.163561	0.257912	-0.0604381	0.0863589	-0.0471549	0.0709601	49907800	39748700	43124700	51618500	25981200	43110500	39447700	61289800	40247600	59327100	56324100	19542700	36440000	56493200	16386100	45875000	36808600	54824100	40850100	42598300	38433900
P96284	pks15	Putative inactive phenolphthiocerol synthesis polyketide synthase type I Pks15	0.163415	0.202028	-0.28574	0.816679	-0.843865	2.1591	2285400	2641600	3474840	2762230	2121170	3041840	2081630	3082140	2409140	3811910	2958420	1691750	NA	2710130	1388280	1940520	2393400	1274560	1734510	1397040	1546490
P9WLJ5	Rv2091c	Uncharacterized protein Rv2091c	0.163393	0.657955	0.0710525	0.00335918	-0.0987308	0.0452448	6955110	5716380	8373890	6862340	2008390	4891080	7213810	5429500	7479300	9450390	10448100	7516560	7853950	7627730	2688150	6863780	7553760	7227860	5407430	5588990	7700480
P9WFX9	trpB	Tryptophan synthase beta chain	0.162782	0.700418	-0.283306	0.556825	-0.25436	0.142748	14530100	11645200	12384900	14460600	5219410	10196300	9009780	18501800	10706200	15366100	18295200	10479000	10259500	10780100	1663360	8357760	13397400	12612600	6694590	6913120	13897300
P9WNX3	serA	D-3-phosphoglycerate dehydrogenase	0.162217	0.237111	-0.212834	0.599504	-0.295741	0.0937998	75207000	62823900	78291300	80026400	35180800	64877800	52210800	75700600	62023400	73844200	71353000	77459300	59033700	68355200	21393300	63017600	48940800	78518500	48639000	57066900	47896300
P95228	fadE6	Probable acyl-CoA dehydrogenase FadE6	0.161725	0.475069	-0.376158	1.59386	-0.53705	1.14064	16116800	12785400	14917600	13920600	8852980	11784800	10383400	15814500	12672900	16704200	17159200	12789600	11357600	10886200	2739980	8815760	11972500	10616300	7299370	7403750	10219100
P9WGI1	sigA	RNA polymerase sigma factor SigA	0.16165	0.270589	0.44171	0.415415	-0.184616	0.138172	39629700	32631700	34625500	42112100	22125100	37165200	33583000	45236600	34114100	40978500	42142700	33036200	36483300	53755100	14521800	57873900	40302500	31234200	31117400	28785000	29815400
I6X9T8	Rv0791c	Conserved protein	0.15973	1.19763	-0.763002	1.82799	-0.233786	0.0812918	4257820	3926130	3605570	4067110	2719850	3911110	2613150	5510060	3731820	4695250	4795780	3619180	4042780	2832260	1211910	2819560	1789830	4194900	3374270	3277750	2008530
P9WNW7	hsaC	Iron-dependent extradiol dioxygenase	0.158842	0.471717	-0.328976	0.244089	-0.912914	0.895484	6007360	5989670	6114000	5421370	3678300	4976070	4717440	9308590	4966760	7449720	7137970	3706270	3298020	6670900	2209680	5038630	3593290	4118450	2784550	2974150	2265610
O53842	Rv0831c	Conserved protein	0.158241	1.17694	-0.948203	1.30354	-0.174534	0.135773	79887100	77376700	89165100	86327800	48139900	84583100	50022100	84392200	88734000	89562100	81017300	160723000	116065000	55512500	20796300	60487400	27294900	71408500	72669000	70160000	29309800
P9WPE9	groEL1	Chaperonin GroEL 1	0.158233	0.506736	0.00682178	0.425294	0.447477	1.46625	226386000	218451000	239438000	224746000	205577000	257381000	239082000	275191000	243531000	321077000	261726000	237321000	220838000	261005000	94382200	236202000	218716000	316284000	318317000	301140000	252241000
P9WIM5	Rv2959c	Rhamnosyl O-methyltransferase	0.158107	0.38796	-0.771502	1.91233	-0.00649528	0.0425574	4724440	5528030	4748370	6563180	2728410	5015200	4130220	4519850	5000880	5470240	5442560	5154110	7923960	3147480	1781680	3499400	2415780	4731360	5541620	4722720	2305630
P9WI79	pknD	Serine/threonine-protein kinase PknD	0.156593	0.530002	-0.161014	0.435463	-0.00570488	0.163018	71854100	65423700	69243700	67439300	42654900	74287900	57976300	74362200	61289700	75980500	86817300	62183800	79295500	67667000	29595000	70441600	52967900	79467100	67282500	67063800	60360400
I6Y0Y0	Rv2514c	Uncharacterized protein	0.156592	0.0257534	0.690791	0.342337	0.633272	0.546447	738463	459641	732665	709455	1543470	948665	688228	594720	1018680	614651	517452	1102920	1584130	625465	1375540	1261920	1103370	639852	1829780	1632990	546686
O53176	Rv2449c	Putative trans-acting enoyl reductase Rv2449c	0.156409	0.552261	-0.141426	0.0244208	0.238905	0.493884	9810470	9516680	8453980	10203100	7154050	9457020	7112380	9397280	11906500	8423040	9859680	12525900	11220200	10979100	5884350	11411000	6168800	11970800	11253300	11067100	5958390
O33222	Rv1226c	Probable transmembrane protein	0.156373	0.134328	0.219813	0.118716	0.247675	0.119051	512263	542298	403500	357571	839642	292972	152328	208348	NA	376380	523007	642974	NA	599514	NA	392308	469909	625727	388893	533848	424297
I6Y3V5	ipdE1	Acyl-CoA dehydrogenase IpdE1	0.156257	0.450049	0.097345	0.0193478	-0.242255	0.00108349	1765180	1397650	1269380	1634850	814980	1191840	1571300	1791940	802511	1323120	1996670	683117	17170600	1890860	NA	NA	1099560	2293280	1225590	844899	1137620
P9WF83	vapC27	Ribonuclease VapC27	0.15577	0.17782	0.0245946	0.00396355	-0.333679	0.146385	8155990	10615800	12395000	8226160	18492300	13198900	10629700	6985610	16731300	6459820	6879870	16697700	36024300	7953330	13671600	15089100	7764760	6124160	10416600	12042800	6452960
P9WFV5	hisS	Histidine--tRNA ligase	0.151957	0.122659	-0.109183	0.745318	0.0229794	0.00949773	12626800	8701420	9589570	10905000	9017070	8727500	8757930	11946200	7920300	10741600	12111700	9295690	8308050	10436900	3424930	8696910	8022770	12708100	8006380	9164230	9159460
P71925	Rv2423	Methyltransf_25 domain-containing protein	0.151671	0.0558138	0.0760534	0.0293749	-1.48228	2.5272	2147760	1871550	3566810	2025200	1300910	2939900	1823520	2479960	1758730	2767850	2019450	1137320	2485660	2878820	1388990	2517650	1752000	1100000	742642	634145	707084
I6WZ30	Rv0679c	Conserved threonine rich protein	0.15156	0.00364829	-0.686021	0.146326	-0.558494	0.0393406	5078660	7272380	7049960	6432600	4131050	4644190	5906380	4430990	4688640	8031750	6560630	6741780	NA	4257680	1217500	10382100	3084730	3728080	4292910	9263710	3379930
P9WNP9	eccD5	ESX-5 secretion system protein EccD5	0.150398	0.922704	0.047093	0.0146052	-0.517421	0.140196	21694000	19627200	19738500	21702100	3991100	16750100	12980000	23211600	18418200	28987000	33564400	14765000	20355900	21513500	5666010	19583900	20973000	17545400	11068700	14850600	12573300
P9WPB1	mmaA1	Mycolic acid methyltransferase MmaA1	0.149682	0.121421	-0.406679	0.840235	-0.0411543	0.0994422	7741050	7658270	10931700	7165720	8257680	8611720	8043600	8790350	8955570	9094550	7293130	8890360	9526210	5242560	6892950	8548860	4674470	6632470	8854030	12093100	6780750
P9WPR3	Rv2850c	Uncharacterized protein Rv2850c	0.149544	0.191267	0.50423	0.292053	0.104188	0.0454874	2843060	1777650	3540880	3502690	2095690	2407830	2019600	3798170	2188090	3035280	3845990	2306340	1591570	4070450	1293710	4055150	2775220	3487500	2490060	2296670	2686240
O50443	rocA	L-glutamate gamma-semialdehyde dehydrogenase	0.149287	0.0196116	0.145889	0.0428423	-1.66693	2.36253	2006860	1507880	1915340	1402820	1166810	1489020	1399000	1925050	1593600	1857280	1709110	849206	1209060	2527990	594612	1736470	1558470	604677	338837	336317	599013
P9WL31	Rv2895c	Uncharacterized protein Rv2895c	0.148737	0.193665	-0.882989	2.17815	0.0264279	0.0882239	20260500	19078200	21550000	20789500	27240100	30205400	23779800	17233800	26865800	22732800	15567400	26274900	25047800	13456500	9914160	20133400	9471580	18693100	25880500	25203700	14219400
O53289	serB2	Phosphoserine phosphatase SerB2	0.148279	0.473115	-0.386696	0.784298	-0.552157	0.343865	16401100	12899800	12349600	15914300	5758020	10724600	8505940	15984100	11755200	14863800	16342100	12509000	11665100	12639600	3296320	7468710	11423200	13468500	8046170	6733550	8798680
P9WF95	vapC17	Ribonuclease VapC17	0.148196	0.0269942	-0.358866	0.229563	-0.172796	0.0726875	4241160	5983840	6581680	4983690	10724500	8636620	6920380	4435820	9766020	4293570	4821390	11873400	10015700	2396030	7868460	8421570	743635	2973710	8703790	9069140	1063150
P72047	rfbE	Probable O-antigen/lipopolysaccharide transport ATP-binding protein ABC transporter RfbE	0.147874	0.15995	-0.0208883	0.0284588	0.138549	0.0764184	8679280	12066700	15513900	9261580	16553300	14200000	12713600	10017700	17353500	10818200	9328130	22371800	18905000	8320500	17431300	14933300	10128400	8024140	17258900	17739900	10731300
P9WJL5	murD	UDP-N-acetylmuramoylalanine--D-glutamate ligase	0.147787	0.452253	-0.613492	1.04441	-0.569388	0.371541	9329830	6932440	8644370	7583970	3370570	6782120	4716070	10080600	5154080	8552190	9515000	6730860	6808280	6432270	1773000	4305270	4756990	8010240	3338290	4480430	4863150
P9WGG3	cobB	NAD-dependent protein deacylase	0.146302	0.0280639	0.215899	0.0248584	-0.0628835	0.218844	2405160	3002100	2341430	2134510	NA	2421660	5403170	3932920	2292880	3671570	2456570	2670990	NA	2803000	NA	2194750	3669710	11168500	1962390	1285080	2658560
P9WI57	pnp	Polyribonucleotide nucleotidyltransferase	0.145163	0.450049	-0.656015	1.27744	-0.281728	0.103612	107088000	86422400	88193500	99214700	40559300	81882400	75343700	121252000	81869400	109272000	112996000	69362500	65882500	80145300	18942800	52861700	56830600	94568200	68824600	64908500	73358400
P9WND5	lldD	Putative L-lactate dehydrogenase	0.14363	0.210584	-0.963624	1.45643	-0.216233	0.127183	306731000	371444000	359552000	320945000	344360000	406147000	306515000	264170000	607995000	312663000	233464000	549851000	448153000	164836000	188317000	267047000	122046000	226833000	399412000	366024000	178621000
P9WHV5	ppx1	Exopolyphosphatase 1	0.141475	0.0954262	-0.0788238	0.844089	-0.111454	0.0663214	7707380	5300560	6655870	7183130	4855930	5902310	5431210	6282670	5445940	6738210	7429770	7149000	5669970	6468310	1752200	5423460	5753500	7123320	5112120	5538270	5388730
O53611	icd2	Isocitrate dehydrogenase [NADP]	0.141246	0.395468	-0.252775	0.214473	-0.289578	0.0381255	44934300	40457200	41132900	51003700	14582600	34440600	32974500	53607700	36905900	52331100	61909100	27165000	33393900	50094900	7283970	36190600	31719300	54428500	31485800	34223300	31976100
Q6MWW2	Rv3538	Probable dehydrogenase. Possible 2-enoyl acyl-CoA hydratase	0.14083	0.365301	-0.942981	1.01487	-0.330775	0.218844	1320470	1233630	1166240	911028	1689630	955081	923084	1713080	NA	1265100	1306550	854778	NA	797711	NA	NA	415545	1181780	1312280	662701	672797
P9WQ97	amiB2	Putative amidase AmiB2	0.135746	0.699677	-0.250175	0.368519	0.194933	0.606583	3375350	3568200	3630650	3573760	2901070	3234390	3219110	3511650	3289320	3786700	3630030	4974510	4219880	3767150	2314600	3361350	2266830	4073530	3653800	4424080	3024360
P9WN67	galE1	UDP-glucose 4-epimerase	0.134898	0.232474	-0.233093	0.142862	0.393631	0.983253	7260760	7404490	8801910	7882240	6361110	8664930	6953590	6966750	11273000	7583120	5857250	8677370	11056100	6980840	5618770	9591650	5317590	7957080	11072800	11430100	8381690
P95291	Rv1922	Probable conserved lipoprotein	0.134716	0.108844	0.275903	0.902305	0.365372	0.652582	1945520	1358200	1683240	1409580	NA	1679410	1128960	1381250	2207780	1295190	2010080	NA	NA	2518260	NA	1870000	1836780	2536730	1509860	2469420	1216330
P95220	Rv0263c	AHS2 domain-containing protein	0.134676	0.00153659	1.15874	5.18283	0.232594	0.183496	2971950	4207050	3142210	3291190	4735360	3490740	5204190	3935340	4754170	4338430	3729250	3311780	3062320	8310280	6683200	7276740	10645700	4078770	4124090	3782000	6526320
O53314	moxR3	Probable methanol dehydrogenase transcriptional regulatory protein MoxR3	0.134074	0.607092	-0.255847	0.239981	-0.409742	0.281638	2098440	2839950	2974290	2079840	2683180	3454070	1870720	2710800	5025970	2338080	2212060	3178180	4418740	1845590	2648710	2743800	983424	1703500	2336070	2777930	791964
P9WQ17	glgE	Alpha-1,4-glucan:maltose-1-phosphate maltosyltransferase	0.134063	0.454235	-0.175464	0.207819	-0.885504	0.338643	7753870	6847790	6272540	7283630	3075490	6055650	4813140	9289810	5509610	8257110	10628700	4359690	5454110	7976530	1291920	5998810	5109640	7042290	3498950	3291680	3059920
Q6MX51	Rv0296c	Probable sulfatase	0.133903	0.13989	-0.496505	0.991186	-0.579784	0.359158	15249400	12472100	10997200	13578500	10078800	11320900	8726180	15458500	10668000	14948700	14175900	7564720	10317200	11203000	4193400	9786070	6262930	14482400	7261410	7887400	7072360
P9WF63	vapC39	Ribonuclease VapC39	0.132267	0.0507106	-0.588908	0.496117	-0.400799	0.305831	1621170	2403390	3355010	1776570	3124040	2847290	2327690	1601660	4104620	1354920	1502150	3666640	4435870	838188	2558080	2357580	836603	1036450	2425100	2332300	1308540
Q11061	Rv1257c	Probable oxidoreductase	0.130924	0.260654	-0.0627012	0.0879732	-0.216993	0.143979	4729040	4302430	4417200	5042270	3901510	4360070	2939940	4663490	4682790	5419490	4865720	3952810	4876620	5627100	1681930	5163900	3185370	4419790	3093890	4408540	2755940
I6Y1V6	cobO	Probable cob(I)alamin adenosyltransferase CobO (Corrinoid adenosyltransferase) (Corrinoid adotransferase activity)	0.130713	0.152692	0.091081	0.129745	0.118367	0.0989949	2984940	4754700	6539340	3459470	7337550	6705570	5018260	3956390	8972480	3618360	2564740	12614800	7031940	3131160	8871340	7559420	3053980	3803950	8741940	7090750	3437280
O33177	Rv1774	Probable oxidoreductase	0.129474	0.908949	-0.947682	0.144355	-0.303617	0.00719354	8311890	3411780	7163580	6502140	5750880	6702690	7525510	5248730	3579940	8409900	6254180	48464700	51571800	4769240	585953	3870320	3079900	4815730	6045560	8572800	4114750
I6X8S7	Rv0223c	Probable aldehyde dehydrogenase	0.128969	0.203264	-0.492518	0.859624	-0.341951	0.371217	3564990	3824450	3724010	3162990	2003460	3170400	3483620	3705130	3913630	5282170	4143850	1963220	2452790	2476100	NA	1604170	3183590	3412190	2084780	1955130	3540730
P9WHW3	ppiA	Peptidyl-prolyl cis-trans isomerase A	0.128933	0.0194497	-0.271267	0.189053	0.376601	0.142748	179375000	245077000	323846000	235430000	314281000	422665000	452546000	155799000	414557000	292591000	155542000	394732000	655756000	122074000	300229000	367610000	220592000	172663000	469625000	469765000	346424000
P9WJJ3	nadE	Glutamine-dependent NAD(+) synthetase	0.128829	0.55657	-0.401646	0.30924	-0.341794	0.00694542	8322690	6481570	6659010	7760490	3433940	5876700	4789390	9267450	5367900	7249160	9776280	6786580	6924810	8270040	1740660	5511410	4301610	9025210	5081760	5146930	4384730
O53816	mmsA	Probable methylmalonate-semialdehyde dehydrogenase MmsA (Methylmalonic acid semialdehyde dehydrogenase) (MMSDH)	0.12863	0.0626932	-0.445841	1.55286	-0.730778	1.92512	21173700	19675600	15777700	20531800	14146400	14479600	14259900	18926400	15571700	21865800	22776900	10411900	15216800	15633500	5393080	13592800	9573790	11871600	9021340	9993280	7722530
P9WFW3	aspS	Aspartate--tRNA(Asp/Asn) ligase	0.128606	0.560705	-0.813878	1.05333	-0.577719	0.207674	12350400	11712400	10752700	11839000	4728130	8650320	6448030	13549600	8274800	12431800	12697300	8756880	11078700	8974510	3515450	7039750	5193610	11509700	6775330	7633770	5196230
O05575	Rv0992c	5-formyltetrahydrofolate cyclo-ligase	0.128103	0.0797843	0.0280984	0.0102931	0.158005	0.09325	15305000	18438600	16146800	14740000	32208100	18228300	20044800	16220700	34386500	16784700	10561100	25967900	23057100	14522000	23939200	22651600	11367200	15448200	26150300	24259700	16416500
O50455	corA	Magnesium transport protein CorA	0.127105	0.45887	0.10477	0.198551	-0.159807	0.148151	2743260	2843090	3027620	3528490	790565	2237540	1634080	3149620	1671120	3130990	5130660	2781490	2860840	4103450	1129700	3358360	2541420	4108940	2573680	2337550	1876560
P9WIS7	dlaT	Dihydrolipoyllysine-residue acetyltransferase component of pyruvate dehydrogenase complex	0.125408	0.226657	0.0751704	0.101228	-0.0523743	0.0979195	121514000	90873200	94370500	103983000	67542900	97323300	74216900	115048000	90833800	148692000	123047000	66985300	78907200	131528000	21464300	94645900	104190000	131186000	90007600	90647800	91364200
P9WI81	pknB	Serine/threonine-protein kinase PknB	0.124469	0.122933	-0.307684	1.02004	-0.125096	0.0606657	7890120	6730960	6666840	8697410	3817310	7604080	6191830	8041840	5745320	8259270	8090390	5508040	6633090	6712470	2695160	4979750	5896640	8392460	5445070	5404440	6898740
P9WMT5	grpE	Protein GrpE	0.123306	0.0617697	0.214805	0.411209	-0.333513	0.135773	19738800	18896700	20643900	24642900	17525500	20385300	14182900	23262500	20940300	22059800	20244000	9448660	22450000	33070800	12871300	24952000	20863600	16582500	14747000	23470200	11002600
P9WNA9	eccC3	ESX-3 secretion system protein EccC3	0.121999	0.412793	-0.344774	0.872054	-0.38695	0.148151	31706200	30620900	28632300	33071300	18098600	28637800	22748500	34439400	26506000	33762000	38657500	27250700	28567700	29850900	6303490	23753700	21346900	32561800	21879800	21921400	20844800
P9WMC9	Rv1816	Uncharacterized HTH-type transcriptional regulator Rv1816	0.118457	0.349355	-0.342094	0.17904	-0.822545	1.18127	1493810	1383880	2218050	1592650	807872	1631920	1052010	1558240	NA	1313560	1621640	2213770	1650170	1178460	NA	1555920	1132820	844665	1123110	NA	555429
P9WK35	ribE	Riboflavin synthase	0.118127	0.131867	0.0031815	0.239589	-0.230317	0.0263226	13483700	17300100	24192300	14158500	32642700	22195200	24198000	17618100	33606200	23460900	14345600	33668200	24717100	15813500	28674900	38688800	9958830	12770100	25070400	28186900	10205800
O53578	accD4	Biotin-dependent long chain acyl-coenzyme A carboxylase beta4 subunit	0.117984	0.284275	-0.38374	0.914727	-0.756861	1.66022	47233400	45479200	49483400	51345900	30746200	45195300	32099800	50252100	38809900	50365100	53933300	38235800	48457500	44339600	17245600	41050100	28664800	33298300	27124400	26703200	20115100
O53931	Rv1780	Conserved protein	0.117859	0.147309	0.0615292	0.154963	0.0245258	0.297596	12258300	15077000	23731600	11268400	13193100	25885800	28894900	9403530	21403600	11317200	7759250	30522000	24662500	7766840	22145400	21694500	9773350	5372880	18589400	16354600	14316400
O53943	espG5	ESX-5 secretion-associated protein EspG5	0.116691	0.427072	-0.195892	0.770847	-0.412148	0.868619	41915300	45470400	44166400	40998900	30516400	40668900	41930500	48219700	57553200	54391700	42673200	29838500	37418100	39681300	22212000	37665200	35521700	37993600	27696400	29374900	33624100
Q79FG7	Rv2219A	Probable conserved membrane protein	0.116642	0.365301	0.165232	0.504953	0.0164944	0.0606657	1535100	1687260	1760970	2113610	NA	1985250	581334	NA	NA	1863080	1752490	1875520	2102170	1711100	NA	1933330	2559930	2144920	1635480	1243070	1852400
P9WHT7	tsaD	tRNA N6-adenosine threonylcarbamoyltransferase	0.116238	0.103376	-0.0266043	0.0683896	0.102295	0.0126319	3770590	3795760	4654280	4173910	3819020	4600750	3315870	4013600	3502920	4467960	4265310	3515970	5492920	4111450	4944370	3387030	2391430	4468360	4264080	3935200	2524970
I6WZ83	Rv0743c	Uncharacterized protein	0.115173	0.0173855	-0.250335	1.47694	-0.142714	0.499361	3072890	3357490	3991480	3090140	3294050	4334620	3681630	3397250	2391890	4173070	3533070	3739960	4013720	2813430	1708410	3482220	2831860	2810350	3292450	3089580	2992940
P9WNP7	fadB2	3-hydroxybutyryl-CoA dehydrogenase	0.114856	0.286041	-0.217415	0.595112	0.261661	0.818694	37664000	36112800	31228700	30486200	52783800	40584400	40020000	38509200	42061100	39509100	34043300	48140700	48835100	39429200	25918700	36922300	27867700	40866800	48140100	49758800	42167500
P9WMX3	glfT1	Galactofuranosyltransferase GlfT1	0.114469	0.497379	0.0459561	0.194712	0.0948975	0.0474331	3830430	4214620	4631150	3841510	3883560	5096840	4748450	4148730	6496280	3856830	3748170	7442920	4976570	4195220	4194720	5705870	4506850	3762150	5075800	4620240	4382100
P9WI83	pknA	Serine/threonine-protein kinase PknA	0.113477	0.13469	-0.51233	0.574394	0.0505961	0.0859268	9490940	10140900	10916600	10720100	9673680	13704300	11458600	11028800	12165900	10778500	10190200	12721800	12286800	6888070	8143420	13501700	6737180	9865460	13787200	12340000	8127760
P9WLD1	Rv2305	Uncharacterized protein Rv2305	0.113136	0.205648	-0.230524	0.0756098	0.0364243	0.0861965	10424100	11105800	10707500	8953540	12394600	13110300	11084400	9565160	14211500	9765750	8909890	16402900	15929300	8693530	10201500	14297100	8251490	9748250	13696300	12840900	9894730
P9WJE7	eccE2	ESX-2 secretion system protein EccE2	0.112525	0.375934	0.137935	0.0592317	-0.172916	0.0365352	2856640	2180620	2171010	2573720	834210	2042500	1971180	2812830	1511850	2499190	4123350	2195050	1988830	3001300	586572	1844330	2933320	2624980	1500370	1830130	2021450
O53154	Rv1463	Probable conserved ATP-binding protein ABC transporter	0.110993	0.283274	-0.192388	1.05464	-0.0513458	0.0411491	17309100	17113600	20284800	19343400	20019000	23957300	21122000	23240800	19567200	23414500	25763200	16538300	19999100	20368800	6427900	17833400	17206100	19606300	20315500	19031800	17482700
P96356	Rv1045	Uncharacterized protein	0.110834	0.296804	-0.460086	0.925608	-0.180483	0.296052	1884350	1242850	1920300	1691550	2600920	1954800	1606390	1796600	2374740	2132190	1937450	2386420	1721620	952114	1587770	1907220	1151860	1275800	1619080	1877320	1706450
O06302	hspR	Probable heat shock protein transcriptional repressor HspR (MerR family)	0.109703	0.0669117	0.711897	0.968251	-0.493984	0.0425574	3227560	7160810	7867630	4685000	5791920	8263960	7406340	3506370	11248000	4205110	3899600	12666900	11575400	3247090	20211100	21560800	1704100	2605790	8096460	7563440	1887250
O07742	Rv1890c	YceI domain-containing protein	0.108511	0.428171	0.071645	0.277652	-0.0289244	0.0411491	2358540	2646550	4041730	2151980	4689050	3649760	3687110	3269860	5190040	2646880	3083770	7435370	4599860	2794590	4850690	5000170	2820480	1555710	4016520	5162590	3138110
P9WJK1	nadA	Quinolinate synthase	0.108261	0.298305	0.210253	0.0247992	-0.458202	0.430495	34241900	31352600	36941000	40029800	26894500	32766700	25424300	34548100	28607800	35217400	45375700	35422900	41193200	42215900	15262000	40759600	35055400	32734000	22440200	24820100	22881200
P9WGB3	cobIJ	Cobalamin biosynthesis protein CobIJ	0.105466	0.325404	-0.353169	0.418182	-0.897268	0.499167	3714540	3642850	3675810	4025720	1852260	3030680	2692110	3938310	2836860	3899950	4506610	2547090	4715300	3399980	666847	3736390	2303720	3576490	1722220	1800530	2111180
P9WMP5	hemB	Delta-aminolevulinic acid dehydratase	0.102416	0.229	-0.193715	0.73588	-0.0603014	0.0314445	11586300	10131800	12103300	11834100	9328320	12165400	10453300	14707300	7715780	14200200	12251200	10532200	12626200	9924880	NA	21220100	10130500	12248200	9163540	10237900	11986100
P9WQP5	pgl	6-phosphogluconolactonase	0.102377	0.740361	-0.445197	0.920921	-0.59754	0.57395	11121100	9470390	9460360	10124900	5651310	9893940	8270310	13217100	9061040	10090100	10243600	7437860	16477000	9070750	2395050	7868140	6043560	8421150	6489810	6027770	5716730
P9WJD1	espF	ESX-1 secretion-associated protein EspF	0.102369	0.403643	0.754474	0.780432	-0.418833	0.062121	19440300	32554000	40746600	27626000	47748700	44378300	49710400	26794400	103650000	32473500	18870400	55012300	157327000	21740300	119626000	102204000	35276400	12631900	41813600	37544700	23414600
O08446	Rv0324	Thiosulfate sulfurtransferase	0.101567	0.0940238	-0.164006	0.239258	0.294001	0.0411491	4434590	5741880	7123410	5205260	12853600	8710640	11444800	4142550	8055830	7230130	3851140	8964070	14550500	3938090	6327530	9326280	6388370	4626160	10064400	10942600	7402710
O53620	Rv0075	Probable aminotransferase	0.100737	0.0176218	-0.435503	2.64359	0.338676	1.10092	6706220	5549140	6162730	5781420	5700770	5810180	5579780	6184830	5946060	6214250	3941220	6678720	6432660	4470360	2040310	4079620	5623240	6486250	7222580	7399740	7762750
P9WNX9	gabD1	Succinate-semialdehyde dehydrogenase [NADP(+)] 1	0.10038	0.214767	0.560569	0.344343	0.199192	0.151467	17168200	13386900	14085700	13666500	6079770	11964300	13801400	16241200	13061300	20370000	20278600	8915270	10839000	23512700	4207970	16799400	24582200	19231200	12023100	12148600	20353100
O06624	Rv1566c	Possible Inv protein	0.0994698	0.0675203	-1.28752	1.63838	-0.0797234	0.104982	11325600	22323800	23202700	17369500	42421100	27228400	28815600	12071500	29850800	18602500	19867000	39016100	31810600	5931110	14187800	13079100	5299920	12217000	28805600	27351500	16559100
P96277	Rv0431	Putative tuberculin related peptide	0.0979357	0.101371	-0.188131	0.337741	0.18682	0.0545291	9733920	5308720	6955340	9382360	4019170	6507440	7419400	6861900	6010980	10779600	8025880	NA	NA	7551590	889205	4658400	12097100	8920510	6913350	5496980	10222400
O53680	Rv0274	Conserved protein	0.0978948	0.232474	0.696232	1.48074	-0.479373	0.662026	1909910	3310550	2534800	2505890	3378900	2235860	3515240	2823530	4999300	2602010	2381490	1847050	4700890	3060510	5153600	5326830	2775170	1229570	2110600	2018300	1618070
O53905	Rv1531	Conserved protein	0.09684	0.0257534	0.624726	1.92356	-0.485327	0.329976	2533010	2282780	2596580	2200870	2369750	1944400	2002890	3025130	1489450	2441270	2928980	NA	973734	3519860	NA	3550550	3146170	2058100	NA	NA	1203240
O53537	Rv2263	Possible oxidoreductase	0.0966135	0.0804734	-0.338922	0.535065	-0.00853961	0.00636624	8097820	10749400	9921930	6786230	18241600	13115700	11983800	9590520	16672800	8892540	7767260	17204000	13397300	7364960	9632680	10924300	4777590	8808920	14204600	12563000	8365870
O65935	Rv1749c	Possible integral membrane protein	0.096124	0.13469	0.375113	0.343625	-0.0154471	0.0110604	16066200	10891600	9984490	9811900	2995480	8859490	11818100	12619500	8849070	11259200	15694400	6120810	10085600	15253700	NA	9065940	12949300	14296700	6349360	8178110	11578200
I6XWA1	purB	Adenylosuccinate lyase	0.0950043	0.780757	-0.21667	0.288766	-0.258357	0.202674	5812170	6521660	6636420	7390570	3904770	6778760	5113920	7172230	6748670	6880290	7050870	10234700	6204000	6848070	2780220	6685690	4538730	5775710	5496110	5408620	3824910
O86315	Rv1232c	Conserved protein	0.0941211	1.0281	0.0247047	0.449276	-0.00276688	0.246499	6195050	6822140	6422170	6491150	4145590	6709420	4320060	6584870	6862900	6845820	6847340	8572150	7352000	7917710	5008420	7391340	5674840	7427300	6468410	6351320	4966100
L7N672	pcnA	Probable poly(A) polymerase PcnA (Polynucleotide adenylyltransferase) (NTP polymerase) (RNA adenylating enzyme) (Poly(A) polymerase)	0.0940868	0.198198	0.102389	0.02061	-0.167249	0.0717463	14012600	12348800	11979600	13376800	10111400	11754700	9197980	13211700	12358000	13138200	14397500	12435600	10608200	16298800	6023850	13511900	12209500	12961700	10408700	10438400	10898200
O06392	Rv0526	Possible thioredoxin protein (Thiol-disulfide interchange protein)	0.0912312	0.691708	-0.327264	0.590692	0.174296	0.221382	7478120	6058050	6864010	7494380	7637790	7875750	8475790	6959760	8535210	6303990	7432000	13175100	14475800	6772580	3950520	6918300	5174160	8237790	9282930	8675730	6954610
P9WJ19	vapB42	Putative antitoxin VapB42	0.0901159	0.101371	0.0634169	0.0976508	-0.121767	0.132991	10558200	24039100	12740600	10690800	47455700	18091500	19370600	5848520	24658000	7363920	NA	19257600	39683400	2822920	44914100	32076900	5732080	5465050	13990400	23376800	19264000
P9WJP3	menC	o-succinylbenzoate synthase	0.0900406	0.0823971	-0.149393	0.0703233	0.125106	0.56468	1432140	1406800	1497020	1655520	1336450	1314720	1482440	1555060	1611560	1337150	1493680	1292440	1863350	2154250	771286	1153510	1429010	2751050	1434170	1689580	1380010
O53897	moaB2	MoCF_biosynth domain-containing protein	0.0900078	0.647203	-0.417368	0.0916833	-0.485294	0.340374	50553900	49360400	72522700	43900800	69550800	77877000	75723800	65550000	85373500	66567700	55509200	115937000	81488700	48150800	56007000	79547600	48110500	35250300	64295600	59355900	40011500
P96374	ppx2	Exopolyphosphatase 2	0.0891761	0.0923091	-0.260904	0.183474	0.148769	0.104982	5072570	6042420	7187740	5424880	9339110	6848150	7038420	5247220	9645570	6472890	4377530	10754900	8096720	3808790	6116980	8297580	5313470	4642850	8185360	9408400	6998670
P95115	Rv2980	Possible conserved secreted protein	0.0890127	0.0789201	0.296716	0.0034932	0.236391	0.0583859	1118960	834700	774076	960724	626473	638917	1073090	1274990	751351	1223830	962204	170988	813440	1025300	NA	404795	1427240	1101160	556943	865464	1483290
P71864	kstD	3-oxosteroid 1-dehydrogenase	0.0884997	0.0186197	-0.118223	0.311525	-0.025559	0.000234532	1931710	1685160	1519350	1952320	1094140	1476740	1274840	1615470	NA	960800	2559390	1740850	745486	1417160	1399810	NA	889604	1707470	1147940	1970350	1277870
P9WPE3	cinA	CinA-like protein	0.0883255	0.134225	-0.288891	0.615471	-0.130393	0.00171549	9691660	7596320	11294500	9150970	3996700	8061470	6083200	8836840	6089920	10953000	10501400	6635290	8304030	8612390	2391580	7085920	6111210	10310500	7205230	7524410	5984840
P9WQE3	ppsD	Phenolphthiocerol/phthiocerol polyketide synthase subunit D	0.0882336	0.278201	-0.152606	0.170879	-0.526099	0.425767	3155310	2654830	2579050	3107790	1583450	2382040	1838510	3401020	2381480	3101930	3451040	2146760	1722430	3352350	1123650	2024130	2616220	2313820	2012270	1556230	1569670
P9WJB9	espL	ESX-1 secretion-associated protein EspL	0.0871732	0.46952	0.0809785	0.193714	-0.80665	0.0882239	1920780	3927290	3047360	2497080	4028040	3026680	4194840	2960220	9405930	3514120	2169800	2687170	12319000	1335680	8330860	4274730	2171870	NA	3443560	1742200	1593510
O33252	Rv2117	Uncharacterized protein	0.0864433	0.0423004	-0.100467	0.00751134	-0.150352	0.0679119	1834650	2741910	2895900	1516120	4930920	2968660	4988200	1737700	4894600	1889040	1240800	4997640	4260400	1195380	4206810	4856190	1099250	1957210	3888120	3261380	1187770
I6YAW3	Rv3015c	Meth_synt_2 domain-containing protein	0.084759	0.0196116	0.223295	0.391123	0.424711	0.777494	5954150	7355740	6764770	5627080	9905490	7548450	7456940	5131200	11111600	5974270	4209170	9627410	10440300	7011530	10162600	12122700	4224240	7826570	13360400	11920700	6193960
O53146	qor	Probable quinone reductase Qor (NADPH:quinone reductase) (Zeta-crystallin homolog protein)	0.0847327	0.0804734	-0.60009	1.12827	-0.66107	0.676366	13199100	11423100	13365000	10543700	8555250	11085900	9068370	12355000	9652330	11435900	12077100	12380100	10325000	11945400	3212560	8627600	5999420	12166900	6463620	7558030	5371400
P9WGR1	inhA	Enoyl-[acyl-carrier-protein] reductase [NADH]	0.0845961	0.170243	0.203022	0.260331	0.342479	0.142748	69625800	90450200	109852000	66204600	127799000	114453000	128732000	67554800	183819000	76527100	52448900	156445000	222425000	59470900	176291000	157456000	95446800	57497400	155996000	147878000	130692000
O06829	Rv1429	Conserved protein	0.0827978	0.0839842	-0.188027	0.188464	-0.153077	0.432253	6999110	9057510	7213310	7592050	10301000	8991430	7911900	6500810	13503700	6429490	5434680	12116100	10257700	6756010	7077560	9132040	6812660	4426380	7995720	7365700	6865120
P9WGY3	rraA	Putative 4-hydroxy-4-methyl-2-oxoglutarate aldolase	0.0821245	0.128022	0.468813	0.351548	0.265733	0.0381255	19603800	27674700	32014100	20382400	51640700	41203200	45205300	23091800	56105500	22834800	18100000	44686900	85333900	19554900	60474600	64590900	28138500	19793600	46531800	45679200	31298500
P9WMG7	Rv0494	Uncharacterized HTH-type transcriptional regulator Rv0494	0.0802067	0.0163792	-1.33928	0.991093	-0.491546	0.0197819	572866	NA	540542	469805	1636170	414534	408916	224071	NA	534054	264371	843039	894648	199654	NA	14679400	197822	NA	570080	145468	359311
P9WN45	glgB	1,4-alpha-glucan branching enzyme GlgB	0.0792132	0.253102	0.43031	1.52793	-0.0430268	0.0256548	4091550	3371260	3517770	3951520	1672770	3374900	3401560	4848790	3074780	4112320	5375810	2979500	2711640	5153720	9131740	4013640	3215080	4323030	3647970	2718440	2955250
P71969	Rv2672	Possible secreted protease	0.0788312	0.0617697	0.676264	0.2584	0.0454778	0.0407326	3018430	3389600	4052470	5121760	5836820	3391210	4385990	4204290	2175600	4355840	4432840	2498360	5611790	7153190	923885	5939740	7011920	4841440	2796830	3523060	5152270
P9WGL3	kdpD	Sensor protein KdpD	0.0781776	0.0341725	0.36344	0.915821	-0.335488	0.0607158	527548	682622	463118	641124	239914	758709	532562	508337	NA	682860	560468	563966	NA	926004	715405	654866	557612	803412	451225	392903	309637
P9WQ45	fadD25	Putative fatty-acid--CoA ligase fadD25	0.0779892	0.438212	-0.601799	0.774171	-0.569712	0.168841	13825700	12605000	12568900	13761400	7792710	10535700	9203560	15251500	10639500	14934800	16092200	11599300	10654800	13291200	3305580	8745420	7818670	14213700	8607870	8328760	8139460
P9WKJ1	cysQ	3'-phosphoadenosine 5'-phosphate phosphatase	0.0768691	0.201121	0.0416864	0.143589	0.483898	1.33435	8498320	10717200	10163800	10034600	8684030	10852400	10721000	8283730	13582200	14738700	9995760	11444300	9761910	9975630	8429090	13542200	10947900	9424180	16655300	15972000	12456500
P9WKF5	adk	Adenylate kinase	0.0759351	0.0931071	-0.214676	0.151575	0.383515	0.112139	87802700	129379000	132827000	112564000	207417000	193492000	215638000	105442000	234919000	128919000	91166900	151092000	375956000	53592600	198587000	175332000	48648700	100207000	242292000	237486000	109064000
P9WPQ5	bioD	Dethiobiotin synthetase BioD	0.0758	0.0438495	0.0364145	0.375623	0.0642524	0.0419721	2394000	2338460	2747190	2915380	1848330	2491660	2027920	2287790	2011840	2758500	2926270	1525800	3482750	2878900	451619	2192470	2717920	2676870	2254290	2329190	2948050
P9WKP3	Rv0906	Uncharacterized protein Rv0906	0.0750411	0.832051	-0.458828	0.623659	0.016358	0.28225	7606600	5540520	6532370	7268470	3901880	6496970	4573300	7921340	6533470	7687740	6861870	6825830	6675230	6972070	3083610	4924660	4529430	7811470	6756320	6385790	5393330
P9WG43	tpiA	Triosephosphate isomerase	0.0734596	0.371487	-0.25526	0.871018	0.336308	1.3428	18121600	19070800	22441100	18059500	19871200	17598800	22878400	21707900	29010700	20950000	18660200	18880700	19184000	17626600	14329800	19477900	12535400	21931200	27010900	26223400	20268500
P9WQK3	ettA	Energy-dependent translational throttle protein EttA	0.0730482	0.219591	-0.10364	0.287243	-0.226377	0.142748	52991800	42307200	45496200	47837400	31924900	44279700	44246700	56258700	40877800	52281100	61144500	36259000	37623300	52736400	15546200	49369400	33051200	49049000	38322900	37375800	27592800
P96901	lhr	Probable ATP-dependent helicase Lhr (Large helicase-related protein)	0.0730225	0.449949	0.314672	0.13368	-0.410986	0.216366	2830490	2400410	2011540	2434110	2539450	2396460	1694930	2673240	2240420	2376830	2217470	2812690	4469250	3035490	1169630	3152200	2935430	2491940	1738300	1702000	1872440
I6WZK7	mmcO	Multicopper oxidase MmcO	0.0726997	0.084866	1.02636	0.379011	0.176535	0.175973	1222430	1408270	1532950	1274800	4783610	1444000	1623540	1869030	1438970	2697730	1489050	1548210	1137250	2941250	NA	1484650	3843170	1631960	997669	NA	1848730
O06798;O53461	Rv1765c;Rv2015c	HNHc domain-containing protein	0.0721448	0.0374629	1.04379	1.7529	1.14081	0.824281	1496290	753202	2114340	1245130	2254880	2860890	4291470	1262830	3506240	2081610	1796890	2363910	3628200	3029620	5036000	5908150	3682030	1253220	5094630	4229840	5187660
P9WNC5	folB	Dihydroneopterin aldolase	0.0719323	0.207763	-0.13442	0.00644914	0.046268	0.00694542	8961910	9642760	13751000	6880280	21163400	16935500	18112900	9942740	29067100	11994100	5652600	30578200	16913900	8027070	15855900	19780000	9199410	6644390	19287000	16630100	11768200
P9WGK7	prrB	Sensor-type histidine kinase PrrB	0.0708832	0.177467	-0.268459	0.342825	-0.343458	0.0637906	9085260	8331730	7522110	9558840	4819730	6751840	6380990	9163950	6291530	8690860	10963100	6617400	7110980	10042200	2341440	5718960	6770840	10202100	5274800	6083840	5773260
P9WIN5	papA5	Phthiocerol/phthiodiolone dimycocerosyl transferase	0.0703494	0.350453	0.0143123	0.0734306	0.0845965	0.00894254	1067790	801157	1444440	1412390	NA	1152900	599951	1165830	NA	1834200	1547390	914256	1025620	1224460	NA	NA	1018370	1297840	1272010	625868	1082790
P9WH93	rpmH	50S ribosomal protein L34	0.0685435	0.0431615	1.29892	0.788581	1.71365	0.851705	7093730	6877230	24634500	7772190	66011700	21779400	35389300	4909270	38527000	7907460	5803990	38702700	37770800	6696580	126109000	95250200	11923600	11587900	126588000	102807000	40061100
P9WFB9	vapC2	Ribonuclease VapC2	0.0684995	0.0681289	-0.161422	0.0346676	-0.275057	0.0251776	3882820	6375520	8604650	4012420	9153690	7041160	7202540	4506340	12135000	5503850	3575390	9263230	10280500	3193210	9398400	10242100	2725020	3887920	10924700	6989820	4648060
P71734	Rv2409c	Conserved protein	0.0684526	0.180578	-0.79113	0.718439	-0.82318	0.402471	4971670	4596600	5107870	5957420	1342520	4315310	2327500	5626560	4698730	4941180	5070390	3021960	2893270	4606030	1007070	3068660	2244010	4144050	2625900	2533060	2570050
P9WKE7	thrB	Homoserine kinase	0.0682375	0.0970401	0.220747	0.0346676	0.0272758	0.0393406	7692680	6123120	7488910	8072110	5354460	6764110	5970150	7276530	6897590	8282310	8391900	4980030	6906930	9341810	3041220	8085760	7679170	8510060	6616520	5834280	7169900
I6X4W0	Rv2638	Putative anti-anti-sigma factor Rv2638	0.066689	0.038762	0.301221	0.118171	0.798472	0.294125	2410460	1392900	1328860	1553390	3640340	NA	1267750	1069930	1666800	2985920	1012970	1418880	3603100	1815190	3353910	NA	763656	3444720	2469710	2654650	1116360
P9WFU5	metG	Methionine--tRNA ligase	0.0649646	0.0535504	-0.39314	1.86573	-0.169682	0.150692	8736970	7903290	7393080	7035500	6251910	6938670	6621060	8656980	6662760	8545620	8056340	6552210	5032500	6461330	2009910	4616200	6098450	8454830	5741630	5707060	6768030
P9WKZ7	Rv3400	Uncharacterized protein Rv3400	0.0647283	0.0646849	-0.066585	0.0287946	0.336795	0.472709	19964900	21075200	22076600	18124000	27427500	26561400	24073800	19830400	32962300	21449600	16545500	24729700	30345700	17940500	24221200	31369100	15785400	22357800	34285700	33405400	16477200
P9WFF5	Rv1086	(2Z,6E)-farnesyl diphosphate synthase	0.0639693	0.0024224	0.528043	1.15861	0.190424	0.424481	3801770	3563990	3502920	3358560	2657280	3320780	3099500	3738460	3874810	3415400	3606260	2356390	2539130	5333010	2490190	5267370	4418530	4408880	3831590	3740150	3833310
P9WQI9	bacA	Hydrophilic compounds import ATP-binding/permease protein BacA	0.0637301	0.259691	-0.38082	0.71058	-0.39093	0.263326	11288100	9335080	7847420	10487300	5619280	8103700	7196670	11185300	7729240	8593740	13264700	7198960	8345660	9982950	2371720	6588320	5858980	9807270	5895910	6464470	5240240
O05769	Rv3090	PHB domain-containing protein	0.0635388	0.119152	-0.138539	0.217638	0.303133	0.318688	17148300	10904600	12748200	13452400	7217360	10193800	13214000	12082900	11881500	15126200	14561500	11447200	15088000	14890200	3794230	8271720	18432900	19762900	11695100	10821500	20769800
P9WP03	deoC	Deoxyribose-phosphate aldolase	0.0633132	0.0143125	-0.141166	0.510967	-0.0757745	0.0590313	3430840	3436280	3158760	2695710	2626300	3291940	3888650	2515160	3550580	3843580	1807730	3328670	4795110	2691840	1798060	3323780	3278330	2911550	3335450	2850990	3368160
I6Y276	Rv2993c	Possible 2-hydroxyhepta-2,4-diene-1,7-dioate isomerase (HHDD isomerase)	0.0630558	0.0186197	-0.105745	0.2584	0.296382	0.577834	21838800	23564200	22604900	26137400	14187200	21484900	26616600	17135900	20963800	35771200	26796300	9769730	26265800	17572500	7035380	24442100	33653300	27538100	27472000	27982300	40443900
P71853	Rv3548c	Probable short-chain type dehydrogenase/reductase	0.0628619	0.288614	0.0771742	0.0386584	-0.433706	1.63847	3097560	2293430	3728210	3208010	2223400	2621490	2403150	2738240	1492010	3023900	3277480	NA	1913680	2765540	NA	3281130	2190870	1948060	1933620	1959220	1256220
I6X8R5	Rv0203	Heme-binding protein Rv0203	0.0627257	0.0182676	0.154608	0.066267	0.531377	0.0530726	438005	1666660	1548590	1472400	2023400	1375240	3618380	374538	5195700	2012120	1222690	487362	2086940	729041	2090650	1769490	1678040	832587	2463460	2482600	2012920
P9WMM5	priA	Phosphoribosyl isomerase A	0.0626057	0.132815	0.0456655	0.176902	0.430668	1.54383	29394400	25874100	31976900	28862000	25469800	31275400	33857800	32577900	34500200	34148100	28818200	16284800	17408500	27447000	28631400	38067700	32048000	32976100	42975800	41262800	37976100
O50451	Rv1234	Probable transmembrane protein	0.059619	0.343858	0.042435	0.025168	0.244607	0.142281	14848300	12461600	16131600	15026800	12960900	14436900	12040300	11441100	14674900	15705500	13952100	15417100	35972300	14709500	7305690	15026200	21118800	18581700	12214900	15627100	20116100
P9WFF7	uppS	Decaprenyl diphosphate synthase	0.0585055	0.363143	-0.764817	2.34051	-0.528057	0.884586	3482180	3541500	3566100	3849700	1852420	3007670	2963830	3515010	2886820	3479890	3737580	3743530	3811880	2565300	744113	2537780	1560940	2774810	2373530	2456170	1828880
P9WFK7	eis	N-acetyltransferase Eis	0.0584854	0.521677	-0.84872	1.64455	-0.169633	0.0798263	9519380	8032630	8652260	9252800	4671590	6584960	5438000	8473720	8076380	10691300	9208740	7889980	8256190	7605500	1471500	4869120	4051550	7359670	6923450	7408560	5651790
P9WKK3	infA	Translation initiation factor IF-1	0.0578069	0.0550523	-0.0590483	0.132812	-0.178223	0.00459002	100624000	233837000	254059000	140580000	303019000	257854000	311124000	96732600	475233000	181558000	92978000	347333000	434031000	82351700	422725000	375031000	112710000	101136000	322844000	284607000	164463000
P9WPQ3	accA1	Biotin-dependent 3-methylcrotonyl-coenzyme A carboxylase alpha1 subunit	0.0577747	0.0120748	0.279885	0.18774	-0.147932	0.126715	4510490	3027450	3821930	4269600	1720130	3614680	3634080	3561170	3078850	4003960	4117900	2366390	4086870	4412130	NA	2771380	4998060	4016140	2543690	2517130	4193650
I6YAE2	Rv2843	Probable conserved transmembrane alanine rich protein	0.057572	0.427107	-0.0989003	0.173938	-0.166453	0.120176	2934840	3155020	2669060	3049830	1452590	1922190	1997600	2891050	2662070	2664400	2894070	1874730	3693420	2483010	1545170	2501430	2823970	2245340	1885920	2511090	2573900
P9WNG7	etfB	Electron transfer flavoprotein subunit beta	0.0574476	0.163073	-0.697208	0.517393	0.0335723	0.138172	89196900	103125000	97870100	108405000	37388500	73454000	87839700	137821000	84627700	101013000	125306000	21215500	65233200	103914000	15277700	64860300	45166700	130056000	92622100	89971700	63796400
P96281	Rv0435c	Putative conserved ATPase	0.0565299	0.3724	-0.00570558	0.403665	-0.21137	0.215984	4130990	3398760	4343400	4600730	2553350	4168710	3918650	4246220	4345920	5372190	4005560	4644050	4120280	4110450	989841	4118920	4346120	3793830	3342180	2634060	3985780
I6Y9Q3	prpC	2-methylcitrate synthase	0.0554884	0.0221594	-0.913343	0.633637	-0.564173	0.383469	29301400	9328240	6721700	13358800	12631700	8700410	15427800	19865900	NA	6131280	13127000	13987300	10873500	8539520	NA	NA	4874170	13022300	9451540	7635180	5575340
P9WFT5	thrS	Threonine--tRNA ligase	0.0552994	0.465171	-0.250809	0.292228	-0.360835	0.000905296	7116640	6879250	7045130	7138690	4668000	5766580	4654380	8630550	5982830	8313280	10188800	5135950	5747810	7409330	1586150	6593490	4969500	8640840	4944770	5769160	4672910
O05856	Rv3210c	Conserved protein	0.0547738	0.0675561	0.110189	0.0783625	-0.289946	0.104982	5324180	7729040	11559800	6082300	3538460	11628600	12463000	4492040	10294700	5761550	4124770	14038300	20560400	3849580	12835400	14581500	2336000	3065390	9341400	9496590	3302270
Q79FX6;P0CH91;P9WPB3	mmaA2;mmaA3;pcaA	Methoxy mycolic acid synthase MmaA3	0.0547317	0.026851	0.169204	0.143614	0.224513	0.420397	11921200	10075200	18138200	11827800	2071910	11855400	16198000	6882810	13359000	11268600	10944800	13836200	15702400	9947730	8586230	16713600	25735300	12878600	14168300	13535000	38887500
P9WPB7	cmaA1	Cyclopropane mycolic acid synthase 1	0.0542905	0.321146	-0.221487	0.146326	0.204363	0.296052	4129910	3517550	5603280	3901720	3412310	4104430	4043200	4207410	3738140	3521530	4189090	6344000	5950960	3243370	2997770	5259570	3692180	3946650	4385790	5720100	4931180
P9WF73	vapC32	Ribonuclease VapC32	0.0532074	0.134805	0.448022	0.170975	0.516221	0.0383827	2149810	2213170	2844630	1513170	6165610	3163090	2286320	1857590	3305280	1586580	1084060	2886840	4926280	1681300	4865030	4541050	1696800	1537120	3922700	4076600	2617110
P9WFQ3	Rv1421	Nucleotide-binding protein Rv1421	0.053159	0.091228	0.0968941	0.143614	0.070024	0.148151	7936120	8773000	11226800	8111090	16913500	12040400	11399700	9773820	14061300	9937380	7751630	17855400	13359000	8575720	16397000	15437700	4769880	7757210	15813100	17794700	6329420
I6Y3U6	echA20	(7aS)-7a-methyl-1,5-dioxo-2,3,5,6,7,7a-hexahydro-1H-indene-carboxyl-CoA hydrolase	0.0529329	0.013026	-0.277888	0.287449	-0.693384	1.28607	3813130	3862280	4288680	2951000	3774870	5330410	4452320	4300700	3958580	3500030	3500770	4054660	5071260	3817180	5315080	2080150	2554020	3694680	2279440	2497440	1117170
P9WFD1	Rv2026c	Universal stress protein Rv2026c	0.0521062	0.284463	-0.714697	0.792439	-0.168184	0.107121	3685040	3115210	5464110	3392570	1654310	4852700	2508870	2951590	2839030	5121040	3004820	4029860	8403440	2706580	1295520	2653840	1480570	2344070	3694450	3855130	1757290
P9WH77	nrdZ	Vitamin B12-dependent ribonucleoside-diphosphate reductase	0.0509437	0.153836	-0.893797	0.804382	-0.455752	0.366991	813765	1122660	1202890	814901	NA	1010200	1285780	1104760	NA	1884180	766071	1117800	879689	903918	NA	573948	439147	1027950	527182	1082530	328037
O06291	htrA1	Probable serine protease HtrA1	0.0498591	0.111555	0.484816	0.322361	-0.00360972	0.0256548	23392300	21409000	21308000	23096600	17681500	22669600	26612600	27834900	19218600	33756100	27714900	14845400	16431500	31567300	10423000	31880700	35471500	24144800	21207800	18500200	24018100
I6YCF5	ipdE2	Acyl-CoA dehydrogenase IpdE2	0.04945	0.169448	0.109291	0.0193478	0.124776	0.566529	1101190	999217	1204740	1043950	563429	853582	704701	1034060	1241470	922182	1144860	NA	729312	1326980	442589	884727	1270980	1463190	1042740	1136230	1014560
I6X579	Rv2728c	Conserved alanine rich protein	0.048832	0.163573	-0.0897432	0.00785979	-0.104417	0.0709601	2757540	3014240	3355580	3673270	5763470	4009660	3898000	3481330	5228490	4118130	3207610	3030440	6113310	3562870	3340600	4955650	2570290	2903760	3929850	4285210	2612420
P9WM25	Rv1332	Uncharacterized protein Rv1332	0.0473762	0.394812	-0.330561	0.355518	0.200129	0.356658	2333230	1615980	1492870	2248070	2636830	2145130	2192530	2887980	1637890	1643470	3230770	1290720	3263030	1772250	1714870	2145250	1263420	2547280	2599460	2266170	2490280
P9WIA9;P9WIB3;P9WIB1	plcB;plcC	Phospholipase C C	0.0466076	0.0583934	-0.211653	0.0617125	-0.343248	0.0764184	723780	NA	1509240	1221580	371466	1618500	941886	1126880	NA	497166	NA	1107620	1794360	472178	911618	1617400	956637	1094320	NA	832102	852692
O53507	idsA2	(2E,6E)-farnesyl diphosphate synthase	0.0462372	0.200634	-0.12177	0.290634	-0.784265	1.29526	8067110	7277530	9363500	8838230	9193560	10098900	9163670	8037630	11320100	8037270	7862730	10886600	12893100	8177100	8666810	13990100	7388880	5234060	5407670	7373660	5056110
L7N6B2	Rv0265c	Probable periplasmic iron-transport lipoprotein	0.0461931	0.0993125	-0.434743	0.524191	0.00846943	0.0314794	11339500	9658500	11931900	8559430	13740400	12784600	11015000	11965100	11451800	7505110	8893370	16658600	14607800	6893270	9885230	12463500	6009950	9242230	13570300	13615100	8113300
P9WFI1;P9WFI9	Rv0281;Rv0893c	Putative S-adenosyl-L-methionine-dependent methyltransferase Rv0893c	0.0454156	0.0327974	-0.325508	0.204352	0.0714555	0.1213	12880800	11619600	11718000	12581400	10770400	9989760	6674390	12602500	11379900	13056400	12692000	6649410	9199590	13121800	7112790	11432500	3388170	16469900	11875300	12543900	3005140
P9WJH5	nuoD	NADH-quinone oxidoreductase subunit D	0.0450791	0.180359	-0.612905	0.893291	-0.508415	0.530887	12391400	15033100	12830800	17523000	5372430	11714100	8389880	11664500	15195400	13024700	12544700	11872400	15049000	10291200	3810970	12091500	5913750	11427800	7188070	10234100	4794820
O07222	Rv1810	Conserved protein	0.0434032	0.0679664	0.37961	0.174556	0.976168	1.48905	895491	529518	748074	1102860	1589570	773910	1497400	900843	1128470	735025	944839	NA	NA	1773030	1157580	1172470	326956	2031370	3039000	1491910	738523
P9WGD9	ftsY	Signal recognition particle receptor FtsY	0.0428361	0.24404	-0.121854	0.551947	0.110279	0.157434	13773800	11942900	15287000	15476300	12915300	16402100	10742400	13409500	13971900	15621100	14300000	18819400	14077800	13073100	7220090	15224200	12243300	14318200	15834900	15417700	12554200
P9WQ19	treS	Trehalose synthase/amylase TreS	0.042792	0.0381877	-0.575997	0.587495	-0.55921	0.241741	4423630	4269660	5115120	5541320	1511820	4025420	3343720	4812720	3490920	5128320	4482520	1987760	4313880	3472210	1494570	4464260	2256160	4651030	2489750	3305660	2440610
P9WN11	otsA	Trehalose-6-phosphate synthase	0.0426809	0.300964	-0.582716	2.06774	-0.132641	0.0383592	6963170	6149690	6197200	6480120	4695490	6158970	3986260	6215190	6772080	6130190	6472610	6649270	5436410	5448740	2283590	4279230	3945530	5867170	6204050	5368760	4894800
O53464	vapB45	Putative antitoxin VapB45	0.0426116	0.0646849	0.774776	0.865343	0.437564	0.0499946	4192670	5586020	5499880	4205600	8827450	7989210	7112620	3682130	8517020	4344330	3299110	7162610	16572300	4993550	15229900	12136400	6978110	3427890	8201990	8855560	6928480
O69681	Rv3714c	Uncharacterized protein	0.0422229	0.0659062	-0.196657	0.0497569	-0.521327	0.167919	1830220	1862650	2466060	1385450	2889650	2995700	2648670	NA	NA	3874000	1204600	NA	NA	935578	3957370	2944360	1359260	816972	2183680	2696210	1252680
P9WNZ1	coaBC	Coenzyme A biosynthesis bifunctional protein CoaBC	0.0420031	0.0525409	-0.694429	1.86329	-0.00797248	0.0275505	11597700	8841660	8342620	11226400	7175900	7676050	7964540	9443330	8357170	7899960	9915860	8820990	7211770	8589960	1990600	5849570	4461140	11235500	8746410	7846880	5811890
O33298	hsdM	Site-specific DNA-methyltransferase (adenine-specific)	0.0410974	0.0839842	-0.0108767	0.214398	-0.491677	0.49284	6480570	7258380	6401270	7799900	5798520	6651060	6857930	8317910	6485910	7200590	9920440	4257280	5130560	8610920	2750960	6089850	7112360	7098240	4138870	4165050	5295390
P71701	Rv0044c	Possible oxidoreductase	0.0406758	0.151345	-0.0373455	0.070831	0.114124	0.142748	20886100	22139700	23047400	20942100	17586700	21408700	19254300	21316400	27343900	18616400	18063500	23769800	21765500	22704600	18109300	26508600	14591200	22060600	23813600	23271400	16257300
P9WHY3	PPE51	Uncharacterized PPE family protein PPE51	0.0402968	0.0642948	1.04345	1.05224	-0.724041	0.237165	7641040	13640700	19318400	7497850	33077400	19893700	35213700	8730480	32681500	14011000	5388170	25720200	58466000	9972420	49152700	67447200	30483700	3357800	12229300	12889600	11161400
I6Y1W3	Rv2857c	Probable short-chain type dehydrogenase/reductase	0.0398585	0.232376	-0.00937979	0.138587	-0.478986	0.325281	7511050	6417730	7217020	5698130	5539120	7227880	5948810	7486610	NA	6597510	7346110	1898370	4272910	6430420	NA	6376140	4494370	7611430	4706830	4478190	4502380
P9WFP3	Rv1842c	UPF0053 protein Rv1842c	0.0394633	0.706536	-0.776728	1.28942	-0.425566	0.329976	2063210	1960770	1601410	2251950	1038010	1977300	1593100	2477890	1784940	2193680	2009740	2020550	1584300	1568670	NA	1040250	1144480	1851760	1499550	1377960	1420220
P9WG79	thiC	Phosphomethylpyrimidine synthase	0.0386458	0.485058	0.38323	0.207819	-0.907301	0.476614	12836700	10436200	10507900	12677400	4741640	9420200	9051750	21197300	8078570	12971400	19774300	5538350	8467670	20997900	2360650	11629200	15593800	7434330	2907030	3694450	7685210
I6YCA3	fadE26	Acyl-CoA dehydrogenase FadE26	0.03823	0.0173855	-0.171309	0.167766	-0.360125	1.08185	2121660	2223940	2346400	2410370	1893070	2185220	2434990	2581250	2748800	2188130	2379190	1132690	1881970	1653550	NA	2578940	1974940	1540760	1717860	1747470	1884820
P96280	Rv0434	Lon N-terminal domain-containing protein	0.0370664	0.17995	0.168038	0.274086	-0.33019	0.465699	2110260	2904940	2374380	2184760	3376280	2785590	2568650	2854800	3270110	2037320	1930170	2416200	4338020	2169190	3481600	3248910	2523000	1979660	2106710	2368770	1938260
I6X7W8	Rv3618	Possible monooxygenase	0.03701	0.297553	-0.527803	1.07923	-1.27998	2.43954	808554	711806	881308	909822	628248	994059	967104	845003	963415	1397710	664067	630858	1194620	478203	NA	684091	611284	362923	NA	306377	474566
O86314	Rv1231c	Probable membrane protein	0.036566	0.212111	0.0825137	0.0364072	0.51398	0.727858	12058800	9820950	12026800	13068000	15601300	17331200	14903800	10968900	13963400	14586700	12843500	12669000	33198700	15788100	9511340	18034100	11886300	14888900	24009100	22432900	13207400
I6WYY7	hadB	(3R)-hydroxyacyl-ACP dehydratase subunit HadB	0.0358454	0.132471	-0.441571	0.425255	-0.0845936	0.0661818	83998500	118886000	148982000	102273000	235104000	188221000	223138000	69601700	250539000	128175000	64402500	220725000	177285000	58552900	126230000	168591000	93170600	68291900	208334000	166565000	114430000
O69721	tyrA	Prephenate dehydrogenase	0.0351659	0.15566	-0.268689	0.739923	-0.237997	0.193805	4759310	4216880	4333430	4257710	2798460	3824830	3896500	4632100	4009760	4807630	3850040	2178850	6002520	3777220	1528660	3903000	3223420	4344990	2751100	3450120	3701050
O53166	acn	Aconitate hydratase A	0.0344712	0.208635	-0.572221	0.638026	-0.411446	0.0521692	70868600	60009100	61868500	71727500	22472200	54078500	49096100	83557700	46430300	76490100	82357700	31006200	40527300	63154100	8877730	40744600	39977300	73003100	42406900	44045800	46192200
P9WGZ7	rph	Ribonuclease PH	0.0334033	0.0351865	-0.607647	0.935841	-0.0590744	0.0566971	9995770	6471980	9437500	8586410	6021750	6558780	8224650	8203540	8930220	8631060	10025200	4865920	7492610	8173480	4120980	6161730	4633390	8807160	7661050	8128300	3774570
P9WJS9	mmpS4	Siderophore export accessory protein MmpS4	0.0329989	0.390429	0.292658	0.130241	0.978329	1.38493	5889850	3434800	5096200	2142550	868469	2331930	4690980	7171200	NA	3624020	3404520	2036130	NA	5615520	2195840	3889560	4524980	NA	6767180	5601690	8710960
O05898	manA	Mannose-6-phosphate isomerase	0.0329763	0.166559	-0.324607	1.33247	-0.155638	0.100098	11389400	13112900	12426100	11886600	13359300	13048300	11344400	12631600	11019400	14041100	12795200	11806400	15743300	12636000	6336500	10465300	9379580	13858500	11907000	10377300	10403700
P9WIC9	gpmA	2,3-bisphosphoglycerate-dependent phosphoglycerate mutase	0.0323261	0.119589	-0.632428	3.96746	-0.101105	0.255792	11272100	13679800	12785500	12523100	13288700	14251300	12943700	13205400	13418200	15477400	13268600	12172900	12975800	9327000	4045810	9661920	7372700	12528200	13288500	11607100	8773420
O53246	lppY	Probable conserved lipoprotein LppY	0.031601	0.041383	0.265562	0.0299625	0.636422	2.71117	3457650	3725660	3979310	3998190	4277040	3896570	4405750	3942030	4192840	3620310	3785070	4439950	4461320	5118880	1759090	4953630	4613460	6190670	5609510	6180760	7584260
P9WJQ5	moaE2	Molybdopterin molybdenumtransferase 2	0.0311353	0.0626932	0.0148546	0.0936747	-0.29011	0.0838117	2922150	2427870	2889900	2945450	1796500	2588020	1889200	3310920	2475970	2812990	3223930	2013520	1227820	3563770	670556	2384250	2845360	3498790	1832920	1346170	2400250
O06154	Rv1637c	Conserved protein	0.0310771	0.249441	-0.218771	0.016765	0.21026	0.622752	13585200	16092100	16100200	16093700	9812470	18228700	14676300	14864900	16281600	16603400	17377000	9066950	25328400	12973700	13037200	18408600	14618600	16232200	18856800	19352200	18377000
P9WFT3	trpS	Tryptophan--tRNA ligase	0.0302622	0.10082	-0.178503	0.551947	0.228201	0.74036	7793300	7239700	6441910	7981320	9949600	6970790	8778720	7295140	9429370	8621860	6731870	5343300	8822150	7489420	6283200	7792390	6058880	9062250	9419250	9195480	8058130
P96404	echA1	Probable enoyl-CoA hydratase EchA1 (Enoyl hydrase) (Unsaturated acyl-CoA hydratase) (Crotonase)	0.0296428	0.228509	-0.37861	0.495468	0.217509	0.0679119	19315100	23276800	24651500	19973700	35500100	33254700	37141700	17743400	35435200	21440500	11845000	34217900	28886000	13287300	24635500	29048800	11815900	17164900	40642400	34579100	22746700
O06604	Rv1586c	Probable PhiRv1 integrase	0.0295913	0.213858	-0.399225	0.833129	0.0223183	0.0393406	4623920	4403100	4337420	4861650	3327880	4862840	2874570	4217450	4086340	4771240	5303680	5352990	4156150	4449130	976573	4134910	2542530	4491700	4451790	4853230	2675180
P95184	Rv3142c	Uncharacterized protein	0.0293009	0.249103	0.0410731	0.247447	0.0471447	0.185921	561453	1207790	850885	999568	619083	675131	595852	624331	574679	753635	892761	NA	NA	911225	406854	855359	533897	604020	766933	710945	684170
P9WJP5	mqo	Probable malate:quinone oxidoreductase	0.0291526	0.511008	0.141272	0.334007	0.535727	1.80134	6269650	6113890	6196670	6979820	3350170	6549870	4768920	6270330	8344690	5048500	6116720	9923870	6375990	8418840	4148480	7812370	5855960	9604360	9538570	8427720	6120390
P9WMP3	hemC	Porphobilinogen deaminase	0.0290619	0.0408465	-0.26008	1.58183	-0.0516528	0.200205	6148400	4986650	5963710	5034140	5256070	6425100	5461100	5359080	6618730	6288620	5571660	4988130	5572790	4371220	3267310	5714820	4749270	4903990	5268110	5269960	5945890
O53422	fadA3	Probable beta-ketoacyl CoA thiolase FadA3	0.0289107	0.0633354	-0.417001	0.857194	-0.0247124	0.173962	85280200	93592900	86766800	91664900	58495400	79491500	77711100	96283600	81771700	105230000	92241100	50289400	68821300	81353100	36736800	75130200	52616100	112979000	82591600	85072100	69398400
P96389	Rv0207c	NYN domain-containing protein	0.0286874	0.126416	-0.0399118	0.0446205	-2.28353	1.23069	4578940	10690800	9885600	6888800	16284800	15080000	19700100	7409980	23137300	9155520	5432730	12655500	29916200	3606040	16658200	16440100	4358090	699677	2124380	3290470	2267280
P9WFW5	argS	Arginine--tRNA ligase	0.0278275	0.0956435	-0.0889724	0.226574	-0.0711498	0.147485	10321200	11349800	10616600	11575300	4745950	10438600	9616360	10617400	11282400	11537000	10666400	8522390	8788650	11142000	4578570	10683400	8945180	13559800	10213800	9658770	8418230
O06574	gnd2	Probable 6-phosphogluconate dehydrogenase,decarboxylating Gnd2	0.0278188	0.0139551	0.0861554	0.00490118	0.206118	0.524013	10770500	9216940	10403400	11552500	5563830	9592600	11415400	11161500	8783000	11695600	11228500	5062480	10050400	13150200	4590870	11264400	10822800	13535600	11552300	12450000	9932010
P9WFQ7	Rv2148c	Pyridoxal phosphate homeostasis protein	0.0265017	0.0274591	0.124321	0.145033	-0.16506	0.410233	2275470	1893000	2102460	1831260	1873210	1909250	1828450	2151260	1822530	1890230	1965960	1503870	2359120	1990240	1738840	2136480	2555080	1527000	1682510	1694190	2402120
P9WF69	vapC33	Ribonuclease VapC33	0.0257105	0.128253	-0.834278	0.263124	0.337586	0.0545258	1188700	3836850	2765800	1688970	4713960	4061560	5006290	1615990	9624470	NA	798764	3905840	5940010	2151950	NA	1407960	3738900	2093060	4848400	NA	4907590
P9WPH1	ribD	Riboflavin biosynthesis protein RibD	0.0246414	0.0148792	0.0187187	0.255768	0.0238009	0.00139611	8773650	8098230	9150340	9635430	5860470	8683830	8510130	8789400	6091900	9722400	8877450	6852890	8967440	10515300	2491790	7079170	10885000	10454600	6484080	7345660	10310900
O06619	Rv1571	Conserved protein	0.0229837	0.228854	-0.502363	0.151575	0.305909	0.155876	3581010	6425220	7451960	5248240	7183760	5818970	4752400	4724850	16555600	5555880	4129240	7189580	6268950	2126160	6089640	7903940	1550840	5857750	8529040	9160880	2540320
O53408	Rv1060	Uncharacterized protein	0.0228782	0.165653	0.437266	0.18774	0.684229	0.359812	21220100	29036500	36588800	22896600	63565400	42724600	60699000	18844700	49401900	29068900	16751400	55443700	45278400	22390400	61151200	60464100	38621000	24018300	76342100	57854300	59730600
I6Y1Q2	sirR	Probable transcriptional repressor SirR	0.0226164	0.0706112	0.243317	0.0284842	-0.0300206	0.109492	4414340	3428480	4767450	3406720	3082300	3835040	3209690	4202620	2065930	5091420	3961030	2258380	3004270	5918860	1425330	4013270	4103390	3815130	2900620	2885100	4141630
P9WFE3	ureG	Urease accessory protein UreG	0.022588	0.186909	0.322029	0.0478622	0.225416	0.110543	7687890	7897250	7331290	9717700	5965180	7097870	11790000	8393530	7667410	7014580	8088340	5054770	7951000	9298140	3547940	10083600	9922930	9495690	9322090	7939550	8653950
I6WXK4	ptpB	Triple specificity protein phosphatase PtpB	0.0224336	0.0663223	0.597057	0.824002	0.726265	0.758913	11145000	12907500	14982800	10607600	20376000	18363100	22362400	11678800	19754500	11204400	9527380	18756400	21603300	13694000	27081900	28179700	18244900	12819500	28351600	27691500	21882100
P9WMK7	hup	DNA-binding protein HU homolog	0.021107	0.0176218	-0.654026	0.136079	-0.425406	0.00762876	607310000	1132400000	1560610000	784654000	1733270000	1854320000	1837350000	571634000	2630180000	864870000	505137000	2302350000	2326410000	338439000	1645110000	1814180000	305662000	487341000	2112200000	1836810000	462339000
P9WIL7	panB	3-methyl-2-oxobutanoate hydroxymethyltransferase	0.0206893	0.0221594	-1.39458	1.05633	0.64528	1.44917	1553270	732591	2239930	1965860	2593800	1301490	2835720	1444520	2310750	2201810	1786700	NA	NA	1080120	747727	NA	286772	2119040	4030340	4232420	1852060
O53317	Rv3167c	Probable transcriptional regulatory protein (Probably TetR-family)	0.0205155	0.0154481	0.216185	0.480171	-0.239737	0.163018	1160680	1935410	2241020	989480	2028020	2134280	2407640	1030090	2622000	1492130	880854	2660050	3449820	975385	4030630	3098260	1613470	594704	1616800	1837720	1818260
O53780	lpqN	Lipoprotein LpqN	0.0197449	0.0705995	-0.203067	0.646078	-0.0254234	0.0607158	22940600	18313700	23239900	30606500	8376260	23483200	37036500	23535400	17376000	29317400	24767700	13112100	23584900	20465700	4065190	19911400	26392600	26844900	18823000	15060200	31175800
O53346	Rv3200c	Possible transmembrane cation transporter	0.0194639	0.0797843	-0.232429	0.896615	-0.344713	0.373715	10353400	9812590	12315400	11339400	6081020	11852700	11260600	10058300	8408920	12056600	11600200	12525800	11226900	10582600	2675980	9341490	9828570	9580950	8153700	7749960	9786720
P95223	oplA	Probable 5-oxoprolinase OplA (5-oxo-L-prolinase) (Pyroglutamase) (5-OPASE)	0.0191006	0.257307	-0.251546	0.688848	0.163813	0.304384	3025700	3510750	3742490	3144980	2420670	3385260	2551800	3312710	4191270	3061080	2957530	3528870	3027710	3073290	1909290	3120610	2210250	3427900	3618390	3842630	2418000
P9WJM3	mtnN	5'-methylthioadenosine/S-adenosylhomocysteine nucleosidase	0.0184444	0.465794	-0.3305	0.179131	0.237561	0.591672	3376020	4367330	4286070	4652960	3181950	4207350	3024120	3496200	4770200	3945780	3332420	4577190	8725110	3280340	2856090	4331680	3411540	4718670	5202240	5233810	4304030
P9WHE9	ribH	6,7-dimethyl-8-ribityllumazine synthase	0.0179609	0.272286	0.923649	2.1525	0.787508	0.782491	8233040	8131090	9514130	9051410	5436170	8463460	11704300	7894680	15959900	9244290	7744850	4719990	18827000	12378900	18355500	17637800	14471000	7644800	15284600	14474500	14742900
O07227	vapB2	Antitoxin VapB2	0.0153988	0.0106473	0.827896	0.817666	0.32646	0.00949773	5050530	9609410	10374800	4907460	19279000	13249500	15434200	4170840	20430300	7274360	4349960	13697900	25329200	5642600	32900000	26620200	10212300	5249280	14806300	14079400	11939200
P71767	Rv1487	Conserved membrane protein	0.0148387	0.0167074	-0.0162447	0.0987138	-0.400019	0.136778	2593650	2062200	3044010	2464910	1326360	1657900	1091320	2248250	NA	2083520	2678690	1733970	1431210	3267680	NA	2039110	557606	2722320	1476600	1649070	355081
P9WKP1	Rv0940c	Uncharacterized protein Rv0940c	0.0147017	0.262715	-1.11933	1.35187	-0.30968	0.00544993	6601020	5678100	5407140	5285320	3932360	4898930	3110080	6825660	4668920	5929960	6085150	4748950	4334220	4563190	1712100	2975720	1890020	7554640	3894840	4633770	2520250
P9WG19	ftsX	Cell division protein FtsX	0.0140708	0.458155	-0.243752	0.683422	-0.131616	0.0256548	3246020	3073430	3025750	3790590	736079	2432730	2696920	2956070	3014490	3738220	4211820	3096320	2659630	2437280	561887	2673490	2676220	2887900	2815460	2688970	2708400
P9WIY9	Rv1063c	Uncharacterized NTE family protein Rv1063c	0.0140254	0.0065413	0.174575	0.276133	-0.792208	0.566529	7874700	11224000	14254200	8520080	22254300	15550700	18334400	8086960	21965300	10962200	6809530	23519400	17824700	8992290	23183200	23727100	8221410	4030550	10434400	10470200	6028050
O06347	cpsA	Possible conserved protein CpsA	0.0140217	0.114226	-0.333351	1.03458	-0.19655	0.337742	1613020	1385350	929078	1616550	1058580	1327640	1694720	1557900	1127330	1742070	1239860	NA	NA	1391320	811159	775942	1387920	1301420	1116390	1081180	1302280
O53407	Rv1059	Conserved protein	0.013605	0.132815	0.586908	0.928771	-0.0165763	0.00949773	4445440	4128140	5416270	4756570	4121020	3902570	5344930	3789090	4692490	4465300	3693740	4509820	5114090	6390550	3164330	6963770	7748370	4255510	4530770	4258540	5726620
P9WN69	pgi	Glucose-6-phosphate isomerase	0.0134979	0.0221594	0.0730962	0.216595	-0.220573	0.2908	13595800	12124500	17003400	14498600	8893750	15082800	12997000	13820900	10008000	14284500	13277700	16519600	13626300	15614200	5944260	14186600	14418200	11459300	11877200	10642500	13444500
P9WNE5	bfrB	Ferritin BfrB	0.0127159	0.412793	-0.667879	0.422547	-0.192132	0.0348327	38851300	80805900	69062000	27193700	60841500	73720100	111415000	79777400	175719000	59569400	31539700	52567600	133104000	22002300	57058000	56162700	30776900	26611000	95515900	69442400	51459100
P9WGP5	secA1	Protein translocase subunit SecA 1	0.0125908	0.197336	0.513808	0.730913	0.244938	0.474788	30497400	25077800	30697300	30276800	12671000	26022500	21419300	32403600	22090600	26258300	39165900	26242900	23208500	49248500	13652700	42715500	31595100	42680300	28841400	30904800	30770700
P9WPZ7	argD	Acetylornithine aminotransferase	0.0124046	0.121587	-0.770687	1.27348	0.828945	2.71117	5876360	4762450	5279030	5313280	4753390	4572700	4378340	5221290	3914760	4998290	4726420	3384730	4880730	3843600	1914030	3493050	2089860	11401200	8407120	8512780	3812450
L7N663	amiA1	Possible N-acyl-L-amino acid amidohydrolase AmiA1 (N-acyl-L-amino acid aminohydrolase)	0.0121963	0.0663223	-0.166894	0.965588	-0.0142855	0.0362044	10275600	9953130	10607800	11155700	14202100	10565200	9019910	9877290	8654840	11772600	9832860	11432500	16227100	10280900	6358120	9036280	9785800	11318600	10225100	10242600	10679600
P9WNQ3	eccD3	ESX-3 secretion system protein EccD3	0.0117144	0.0130732	-0.195919	0.558964	-0.155015	0.142009	32414700	28791700	24588800	38286800	10172500	25083200	17431300	28546600	18699000	29837900	36580400	14497200	22028800	26601200	5644460	17194900	28975000	29077400	15709600	18192100	26863500
P9WFI9	Rv0281	Putative S-adenosyl-L-methionine-dependent methyltransferase Rv0281	0.0116553	0.0532847	-0.0248006	0.00396605	0.186377	0.152978	23946300	24623800	23096700	26330600	18504700	22878700	22684900	25916000	22998600	25934700	23569500	13944200	19012500	29568300	14028700	28902000	16504100	29522600	26690000	25873600	14249900
P9WHU9	proB	Glutamate 5-kinase	0.0115687	0.0642948	-0.266769	0.0800242	-0.143625	0.0348749	2940990	2301150	2594700	2887290	1993830	2790130	1881170	2679080	1436320	3061470	2552100	2946510	1443920	2156660	NA	2990220	1526910	3260530	2149770	2334650	2363010
O07801	chp1	SL1278 acyltransferase Chp1	0.011543	0.15995	0.592882	0.344343	-0.573394	0.657313	1991940	3222300	3649280	1981730	8586780	4270160	6834050	2979520	6914800	2785540	2000460	4460130	4377670	3083470	6353900	7254240	4654200	1733570	2822550	2082330	3821700
O86353	Rv2054	Conserved protein	0.0112496	0.0402999	-0.689206	1.30452	-0.100183	0.0930072	30925600	36620500	38449900	37224900	19562400	38756600	39369400	28167100	43504600	31528000	25410800	44602500	44220700	22912600	20466800	31760800	23260800	31833200	42944700	35576200	33879100
P9WG45	gyrB	DNA gyrase subunit B	0.0110812	0.177393	-0.232768	0.517125	-0.277244	0.163018	24629400	23320200	20900100	24035300	12795200	20278000	20449200	25964400	20626900	21495600	27603300	17929900	19304200	24084400	6664230	20870500	14701500	23946100	17538900	16953200	13189700
O53652	Rv0201c	Conserved protein	0.0105437	0.0109438	1.05899	1.30452	-0.509836	0.107411	7743480	13737400	14628300	10448900	20162200	20038700	20171300	6152730	19847600	9978500	6526280	19492700	36271300	9818230	56763200	50337400	10617900	5753610	14852500	13563900	6983080
L0TC47	lipV	Lipase LipV	0.00979467	0.00665154	-0.186014	0.15881	0.0775182	0.0489533	24920500	30583600	34056300	28992000	47968500	40218700	47751000	22367500	61626700	26997600	15705600	41579000	61976700	20003100	39870000	44341300	11709600	26354300	53934200	45518200	20523300
P9WH11	rmlC	dTDP-4-dehydrorhamnose 3,5-epimerase	0.00969312	0.0679664	-0.147768	0.720146	0.335599	0.580962	9772740	7858780	13629500	10020200	8760560	10593000	11773900	11039700	8625160	10079700	10095800	8993410	10367100	8601430	5617400	10583000	9487960	9151140	12167700	15068200	13121300
I6Y3Q0	fadE27	Acyl-CoA dehydrogenase FadE27	0.00908711	0.0391185	-0.454609	1.95131	-0.516506	1.18127	1423770	1195340	1732840	1491360	1222490	1340490	1206550	1253900	1444020	2093280	1557420	1085520	1136330	1081620	176649	1049810	906522	691932	1108280	960078	914096
P9WNE3	cpfC	Coproporphyrin III ferrochelatase	0.00868564	0.0231282	0.0501838	0.0193478	0.168571	0.0353437	775030	669693	764266	633896	304770	601598	948784	815982	462129	346524	729162	793343	618312	685644	NA	NA	701152	1028670	91696.3	727207	778189
P71885	Rv2327	Conserved protein	0.00793613	0.0609294	0.259944	0.332324	0.397672	0.271507	5367670	9587530	10030700	8516670	13030500	13422800	13380000	5172190	12977500	7819460	5030620	12352600	20093900	7521110	16347800	18716500	7674370	8042160	18257000	15571100	10857400
P9WJK3	mviN	Probable peptidoglycan biosynthesis protein MviN	0.0076609	0.0427597	0.217864	0.011777	-0.0257439	0.0474331	10091100	10021600	9575200	9201770	5101870	9464230	8266890	10291400	6598250	10628600	11481900	5780480	8737840	11838100	2941210	10175900	12574300	12020900	7713790	7328890	10879900
P9WJJ9	nadB	L-aspartate oxidase	0.00606881	0.00262258	1.02416	0.902373	-0.194216	0.0362044	8082820	5792010	6265070	6818830	3018110	5833500	6878890	4049930	4981270	4682950	7774780	9743430	7601690	16351300	2168360	9132230	16775200	8225170	3897910	4279130	6672810
O06300	Rv0349	Uncharacterized protein	0.0057076	0.0310308	-0.261915	0.73588	-0.016184	0.0365352	4457570	5079800	4600380	4826210	3950000	4323950	4290610	4475240	4033990	5825340	5949100	NA	2822550	5483550	991127	3273940	4161110	4527730	4370300	4445390	3847220
I6Y0R5	folC	Dihydrofolate synthase/folylpolyglutamate synthase	0.0051627	0.178362	-0.251463	0.476581	-0.711479	1.20046	7136210	6364130	6089860	7338930	7274650	6846730	5610880	8181270	6867230	7665050	6875320	5349770	6628210	7865070	3246210	6344570	5158540	6284000	4079630	4282660	4079850
P9WFW1	cysS	Cysteine--tRNA ligase	0.00472494	0.156658	-0.419591	1.15826	0.0361909	0.000585081	9625870	8992670	9688970	10390500	7685620	8930360	7712470	9797560	8942050	9102290	9330170	6424780	6223370	8458470	5014340	8432160	4658400	10182900	8594180	9848040	5838510
P9WK37	lpqB	Lipoprotein LpqB	0.00472166	0.156848	0.165625	0.010827	-0.209094	0.204529	13986800	11200200	13208600	13790500	9786700	12254700	13609100	13319900	14627500	15489000	13183900	12312600	11116800	15665900	6020000	14206700	15424200	11683400	11169600	10310400	12259200
O50402	echA18	Probable enoyl-CoA hydratase EchA18 (Enoyl hydrase) (Unsaturated acyl-CoA hydratase) (Crotonase)	0.00358154	0.0381877	0.429146	1.84548	0.446923	1.57931	2880700	2736390	3228570	2374900	3639290	3633920	3417620	2973380	3208050	3648480	3265140	1932780	4370550	4586630	3666480	4107500	6012110	3907910	4894010	3773290	5262110
O07427	Rv0183	Monoacylglycerol lipase	0.00110677	0.175011	-0.68115	1.61294	-0.107271	0.0223783	30946600	25934700	34035900	27478000	21388200	31340000	31696600	27730900	33811400	26260100	28129300	35562600	34654900	22579300	16021500	28402600	14597200	28663600	28794500	32329600	20549800
P9WP55	cysK1	O-acetylserine sulfhydrylase	0.00083477	0.15566	-0.517388	1.32639	-0.168703	0.0563528	15033700	10673500	13383400	14202000	10074200	14844100	13390100	13558400	11113100	13237300	12028700	18264700	17013900	9596580	1970220	9113020	16514600	11183500	10832300	12641300	17779800
I6YGW9	Rv3678c	Conserved protein	-0.000213945	0.0167074	0.560935	0.468343	0.423317	0.111282	29564100	61744900	74856200	41924900	140714000	82435300	112295000	28974000	121995000	54965900	25913700	94724300	171721000	36654100	185518000	151646000	69213400	38572100	135768000	122816000	77949400
I6X5K1	glnA4	Probable glutamine synthetase GlnA4 (Glutamine synthase) (GS-II)	-0.00125138	0.232474	-0.226176	0.68639	-0.32036	0.215984	4525860	4080630	4953370	3546180	2115540	3587030	3175610	4016570	2796150	3495100	3760890	1752950	3672740	3615470	1786590	3505210	2627880	4267400	2803290	2888020	2857470
I6YGF8	chsH2	3-oxo-4,17-pregnadiene-20-carboxyl-CoA hydratase alpha subunit	-0.0017144	0.332895	-0.397846	0.509465	-0.361009	0.352849	907920	1438020	1903870	1450010	2150970	1932520	1524050	1009660	1834860	1522240	534970	NA	2209940	1156740	NA	1430910	932998	765252	1799690	1399360	973951
P71838	Rv0785	KsdD-like steroid dehydrogenase Rv0785	-0.00219999	0.0626932	-0.104695	0.519341	0.432065	0.685781	4242700	3725080	3396220	5164000	1648490	3227740	2917530	3373410	2902590	3408680	5178610	3802850	3345200	3597720	900875	2719260	4062370	5812520	3854800	3863520	5300590
O07755	Rv1874	EthD domain-containing protein	-0.00264255	0.538554	0.152093	0.14463	0.262296	0.370892	4265910	5524600	5581420	4866760	4296420	5792390	6905140	5753560	9913020	5275420	3926040	4904550	12187200	5358460	6919190	6947040	3025910	5557600	7694660	8512360	4256610
P9WKC9	tgs1	Probable diacyglycerol O-acyltransferase tgs1	-0.00271201	0.194159	1.15	0.745643	1.08603	0.479639	1289100	2326150	4975330	NA	5332410	4231000	5494850	451943	3430840	1546800	22300000	5758200	8760000	3179590	13264800	14148300	7165310	2090550	15007300	10045000	9498980
P9WJI5	nat	Arylamine N-acetyltransferase	-0.00287469	0.0139551	0.292223	0.212644	0.624177	1.1142	3643990	3615820	3991260	3758070	5067860	4847060	5181930	3128000	4042390	3215320	3924240	6267570	6696280	3453040	4911760	6012410	4863040	4504300	7569440	5610920	6692790
P9WF31	xseA	Exodeoxyribonuclease 7 large subunit	-0.00312993	0.328481	-0.0793007	0.317192	-0.0194512	0.157305	3369210	3430780	3661490	3614980	6785280	4776700	4346350	3243560	5344930	2947610	2157080	5002030	4063550	3193360	3737960	4607600	2794680	2715680	4849410	4372340	2852570
P9WKN5	Rv0953c	Uncharacterized protein Rv0953c	-0.00384324	0.602976	-0.619876	1.67594	-0.112904	0.661608	3012770	3251410	3216210	2578990	5450770	3902150	4195400	2003650	4505570	2744970	1409370	4358490	3740550	2066910	2012820	2592180	2164650	2066890	2975770	3037550	3178350
L7N668	Rv3196A	Uncharacterized protein	-0.00401895	0.362553	0.258122	0.175108	0.371574	0.0198293	553156	1923060	809407	791723	2439930	1883640	4564270	NA	5610350	1371900	523912	1878400	4556230	726097	4079800	2523970	1981400	733227	2408310	2465660	2523140
P9WG25	tkt	Transketolase	-0.00667785	0.0750574	-0.452921	0.476581	-0.788344	0.311992	53369100	52374700	47834200	55727000	19559100	43238000	42796100	65319300	34346400	62854200	60880200	19912400	26937400	55340000	5240340	35818500	34073200	50712600	26091900	25100300	29300900
I6X9S5	ggtA	Glutathione hydrolase proenzyme	-0.00673375	0.0145314	-0.356523	1.1343	0.351153	0.851705	4224210	4841510	5072140	4449670	4409890	4985890	5915150	3310090	7664430	4627420	3343770	5010510	6361740	3677240	2646310	3885630	4090410	5947050	6404410	5316780	7289720
P9WK09	mymT	Metallothionein	-0.00725723	0.159211	-0.314958	0.140228	-0.0233118	0.0343686	5474970	2904950	2899360	4500070	1986330	7643440	6867250	4747650	4207330	1686570	1371210	5114150	6507820	4559830	5750520	2666750	2675150	5095020	6466430	3760860	3030860
O33194	Rv1692	D-glycerol 3-phosphate phosphatase	-0.00765995	0.0331967	0.364096	0.140067	-0.021352	0.119996	4787430	4802070	4086290	4329320	4183820	3575760	4064660	4886470	3511040	5080120	4812290	3207120	2707790	6445980	1761100	5259440	5510340	4532640	2581180	3712070	5000540
P9WK17	glcB	Malate synthase G	-0.00766427	0.12419	-0.447855	0.607971	-0.394395	0.0708432	85837400	72927900	75995600	84015200	38442300	65615800	66181900	97424600	56656200	88426800	101810000	37837800	49790800	77335600	16654200	59318600	47613000	88942000	55218200	55750100	52303100
P9WLA9	Rv2411c	Uncharacterized protein Rv2411c	-0.00772497	0.00502897	0.161446	0.143427	-0.698379	0.765165	11742100	9564560	11169400	14078900	8595470	10885300	9185700	12817700	9605740	13640400	12048600	6413270	8169840	15976300	5782350	13630900	10717500	9923500	5419880	7316400	6100040
I6X9V3	Rv0811c	Conserved protein	-0.007856	0.0130732	0.450041	0.379761	-0.581219	0.156943	6226520	5449710	5365970	6396930	4471730	5518240	5409020	7230810	4364410	6475820	6581320	4288790	3225360	11749900	1676720	7820580	7068890	6650790	3573920	3697090	3588070
O06409	Rv0543c	Conserved protein	-0.00991115	0.111732	0.721603	0.896615	0.339878	0.166485	5381600	7880590	7908600	8219890	6122260	8563130	12892700	6075490	9633420	5097040	5952780	9983790	23839100	6134100	23677000	16805000	9277780	5517700	16853900	10602400	9416630
P9WMU1	wag31	Cell wall synthesis protein Wag31	-0.0099521	0.262715	-0.922014	1.0821	-0.378222	0.39103	103520000	118834000	121986000	121681000	53926300	130630000	125712000	112766000	111008000	128923000	139424000	50622300	224186000	59960600	56083400	94037800	68479000	87382500	102260000	59848300	99856600
P9WQC1	adhA	Probable alcohol dehydrogenase AdhA	-0.0100885	0.111732	0.353747	0.00519978	-0.349067	0.182689	3353950	3065820	3216700	2255890	1073600	2092620	1641590	3501910	1812290	2404950	3399730	2075390	1691750	3598900	658768	2554130	3211360	2780080	957494	NA	1771080
P9WFV9	gltX	Glutamate--tRNA ligase	-0.0115434	0.151345	-0.189349	0.728439	0.180235	0.96505	20821000	18675500	19330300	21446800	17572400	19814100	16809800	21227600	22050900	18308800	18949700	19402800	18207200	19343000	13314200	19418600	14562400	25015300	21251300	22553800	17956300
P9WG77	thiD	Hydroxymethylpyrimidine/phosphomethylpyrimidine kinase	-0.0120262	0.017363	-0.833258	0.970457	-0.304962	0.104982	2589270	2285330	2052100	2387510	1545160	1577340	1705060	2258520	1564630	1811610	2328920	NA	NA	1503880	NA	NA	799644	2667130	1802870	1519330	1073030
P9WP53	cysM	O-phosphoserine sulfhydrylase	-0.0121647	0.0659445	-0.0487983	0.478208	-1.25211	1.8621	2709380	3195400	3801430	3405550	2262310	3254850	2215460	3381350	2662180	3572210	3311920	2332180	3025220	3294550	587778	2891690	3286560	1955190	1622390	1037480	1060680
P9WH55	rpsO	30S ribosomal protein S15	-0.0135197	0.123755	-0.402917	0.244231	-0.298942	0.136778	78597200	131818000	176679000	90983300	111209000	154644000	114598000	56495900	165650000	67428200	47120300	159630000	205874000	29972500	138785000	154301000	34562200	46959900	151943000	124655000	61646600
P9WQ39	menE	Probable 2-succinylbenzoate--CoA ligase	-0.0147565	0.0186197	-0.391578	1.40466	-0.153112	0.138172	2236430	1566830	2072250	2103040	2193330	2581240	2761330	2083100	1827720	2456010	2258920	2985280	1971750	2009880	770953	2045130	1334050	2344990	1888390	1925180	2019780
P9WQ13	end	Probable endonuclease 4	-0.0148048	0.202678	0.472923	0.740399	0.489252	1.51096	9837050	9684680	8914870	11985900	7249240	9360050	12917500	9176590	9353910	9817700	10737300	5565420	10712500	13663100	7759110	13980000	13220000	13720400	12378000	13468700	15132300
P9WGA5	Rv2603c	Probable transcriptional regulatory protein Rv2603c	-0.0150672	0.169847	0.287315	0.031058	0.363589	0.635198	22972600	25499300	21224600	22826000	22574300	19203900	29021300	16493400	23632000	29928400	21908300	17992500	23269400	29412700	10654300	26299500	34188300	33149600	26992300	26728400	31744600
P9WHG1	prfB	Peptide chain release factor 2	-0.0152066	0.0539782	-0.192269	0.0546402	-0.486513	0.0583859	23271100	22323700	21988500	23085200	15487400	18163200	18685400	26269400	17246500	26588700	26959500	10939400	15318600	31202400	6388200	22116700	16373200	29012900	15815600	15572900	11622100
P9WFI1	Rv0893c	Putative S-adenosyl-L-methionine-dependent methyltransferase Rv0893c	-0.0154732	0.0744137	1.074	1.7529	-0.108231	0.00949773	854349	1920030	1070780	1426640	799298	1304360	775670	995944	NA	1122770	1435830	844677	NA	2254270	NA	2365110	1044670	1246130	740649	1804870	700191
I6YEB6	Rv2766c	Probable short-chain type dehydrogenase/reductase	-0.0173109	0.348327	-0.261506	0.153532	0.0968403	0.0581552	11826700	13871600	16964600	12733300	15138300	14986600	18326200	12832500	25303300	12302400	9925610	16783200	36912200	9341140	15663000	16504000	7534710	10885500	19174900	19613200	12879300
P9WJE5	eccE3	ESX-3 secretion system protein EccE3	-0.018185	0.0559749	-0.319017	0.788581	0.111065	0.205766	22524700	15355800	18803500	21680000	10703800	17080700	17400100	18328300	11049300	19826700	22752300	12811600	16036000	20447500	3746080	12487900	15408500	24608100	17859200	18809000	18776100
P9WI63	pknL	Serine/threonine-protein kinase PknL	-0.0188284	0.168103	0.204891	0.0267506	-0.00256663	0.00949773	881141	387985	631921	1047250	NA	527029	224263	511647	275092	632276	733073	430105	686395	896733	314013	683873	651932	807327	656017	500873	454070
I6YG92	Rv3482c	Probable conserved membrane protein	-0.0190537	0.020929	-0.867235	1.02835	0.00789323	0.261876	5993180	6337750	5312190	7211730	2364520	5598630	3793570	6273980	5354760	5695590	6697390	3697460	3164570	5229290	2395780	3216530	2921770	7749420	5535000	5723690	4557350
P9WQ95	amiC	Putative amidase AmiC	-0.0199342	0.0694034	-0.701882	1.52793	-0.307149	0.0579797	16529700	13387700	12674900	14989300	8423290	13015300	10817200	14072600	12462900	12918100	12755300	14609500	12255700	12759300	3533150	8259630	7743200	17093900	10829200	10209700	9420500
O06169	Rv2506	Probable transcriptional regulatory protein (Probably TetR-family)	-0.0201987	0.157922	0.655846	0.690426	0.5567	0.205766	888806	727476	1955180	1200080	NA	1627780	1035890	928289	1258180	2560900	846123	2864740	946703	1117710	2751770	2401230	1121630	835650	2291910	1911090	1377800
P9WPD5	gltA2	Citrate synthase 1	-0.0203577	0.152367	-0.619005	0.842172	-0.10291	0.0199216	101987000	92582600	91625600	98204900	49407500	95322600	72949500	105372000	73959600	95784100	107462000	73268400	86786600	80436300	30475600	88978400	40128400	102996000	85871600	86545500	39785300
O53182	korA	2-oxoglutarate oxidoreductase subunit KorA	-0.020739	0.0705995	-0.00528877	0.151575	-0.497998	0.622297	21738300	20388400	18817700	24520100	12017400	19075300	18153100	24800900	14818700	21359200	23733800	14586700	16246900	25023600	7895340	19812300	18198700	17706700	12110800	12648000	14366000
O53371	sdhB	Probable succinate dehydrogenase (Iron-sulphur protein subunit) SdhB (Succinic dehydrogenase) (Fumarate reductase) (Fumarate dehydrogenase) (Fumaric hydrogenase)	-0.0209343	0.0705995	-0.240631	0.20656	0.065448	0.134152	6397780	6121810	6581550	7452310	2155060	6693820	6193110	6278130	5796700	6333240	6945240	5253870	6333100	6400690	2861590	7296750	4429150	6981310	6959190	6430210	4667970
P9WHL9	purK	N5-carboxyaminoimidazole ribonucleotide synthase	-0.0231455	0.0331967	-0.450656	1.19273	-0.352321	0.212423	7894200	6661240	6773230	7290540	4636140	5862180	6250740	6709020	6850350	6401430	7096990	5960310	6327810	6699240	2758500	5502800	4245390	7515110	5047590	5388210	5022180
P9WI53	Rv3807c	Putative decaprenylphosphoryl-5-phosphoribose phosphatase Rv3807c	-0.0238277	0.210807	0.336969	0.513495	0.405826	0.269355	1363350	1303300	1211780	2067710	3335890	2285170	3710060	NA	NA	543268	NA	2033840	2361170	1945410	4888830	2206690	3016760	2168740	3813740	2470040	3008760
P9WNX5	asd	Aspartate-semialdehyde dehydrogenase	-0.024687	0.0024224	-0.105415	0.0937611	0.481087	2.15133	50411800	44464600	47533400	48150100	43959400	45304900	37683300	48145000	44613900	44066500	46363600	41394600	44458600	48165000	36060200	54557800	28437600	59229100	67997300	67243600	41543500
O53291	fecB	Probable FEIII-dicitrate-binding periplasmic lipoprotein FecB	-0.0253883	0.00501991	-0.170356	0.142457	-0.300991	0.0516537	17661900	15595700	15891600	15805200	8581370	12972900	12687400	15805400	11266400	14904000	16378600	9682360	15743300	18342700	5630230	15047700	12669700	20969400	11799000	13401200	11916700
V5QPS4	Rv3098B	Putative antitoxin Rv3098B/RVBD_3098B	-0.0266486	0.117667	0.407694	0.427268	0.142333	0.0121813	500511	1330550	1399720	855714	1855440	2141230	2840560	667519	1850470	947495	602872	1800710	2676330	704960	3869090	2784350	929285	839835	1756130	2378810	1333580
P9WLI9	Rv2197c	Uncharacterized protein Rv2197c	-0.0267722	0.13869	-1.20256	0.323791	-0.436004	0.0545291	9673660	9219550	6631140	9391250	3933860	6094320	4817700	8029580	6203220	6815220	8042560	3597740	3014810	9006990	NA	2881250	2427730	11872200	4815550	4987650	2428770
P9WK13	mdh	Malate dehydrogenase	-0.0271942	0.0310308	-0.222168	1.37736	0.251882	0.816944	187436000	165656000	176859000	167800000	175648000	177108000	190854000	196006000	182780000	224672000	164333000	141161000	150834000	170311000	79919300	161205000	142029000	210451000	216092000	210742000	187465000
P9WGW7	rsmI	Ribosomal RNA small subunit methyltransferase I	-0.0273029	0.0903208	-0.405865	0.857194	-0.0256991	0.0370214	3375440	3897320	4637470	4072600	3412340	3701670	2992500	3427030	2342580	3837520	3093750	5929410	5261060	2996950	2590970	3429320	1396950	3330460	3942170	4302970	2161120
P9WM51	Rv1260	Uncharacterized protein Rv1260	-0.0282863	0.23678	-0.188507	0.066267	-0.303822	0.0393406	14289900	14109800	14690800	14735100	8340650	13740800	10981500	15870900	12502200	13280100	14391600	12963400	14991100	16232100	7154870	15866400	8896680	16339100	10996600	11864200	9572250
P9WLT1	Rv1708	Uncharacterized protein Rv1708	-0.0299912	0.27844	-0.465012	0.663625	0.0650732	0.0227726	14227900	17092200	15863500	16532900	25157500	18841700	17997700	12017000	22882900	13625900	9685260	20437700	19855200	10470700	14294700	18853500	9150280	14289000	21472600	22977300	10919100
P9WN73	zwf2	Glucose-6-phosphate 1-dehydrogenase 2	-0.0301567	0.013051	-0.0227256	0.00377166	-0.698193	2.67903	31228600	25382200	29327600	28009200	26254400	28051600	26182100	32431900	31724500	29187900	25671700	20205100	21848200	28485500	20626700	34942400	26657400	18793700	16682400	17844200	15244900
P9WLH5	Rv2228c	Bifunctional protein Rv2228c	-0.0314153	0.138479	0.0726305	0.243886	0.198171	0.108021	5190360	4660830	5284220	4772970	3928400	5339260	4514340	5108490	2815570	5034060	4306260	6447860	2723450	5390170	2223630	4959850	5078970	5424580	5566070	4356400	5526930
I6Y3P5	yrbE4B	Conserved integral membrane protein YrbE4B. Possible ABC transporter	-0.0323055	0.0333905	-0.741176	1.30452	-0.378845	0.134073	5018270	4216120	4191750	6564460	2518120	4494590	894021	4122760	NA	4420830	4342710	4094170	2122710	2522300	633408	NA	3184340	4798460	3026540	2643090	3458300
O53532	Rv2258c	Uncharacterized S-adenosylmethionine-dependent methyltransferase Rv2258c	-0.032628	0.382218	-0.287762	0.758178	-1.1384	2.0105	23315100	20454200	25103800	20916400	9223100	15671700	19100000	29666800	16208700	22763400	25916800	14254400	17230200	17070300	5944240	16440700	18166900	10790900	5467140	7792310	11232700
P9WQB9	adhD	Putative alcohol dehydrogenase D	-0.033555	0.178934	-0.664742	1.10921	-0.968743	1.72573	3595760	2743450	3635210	2537250	1046290	1878390	2545000	2868320	2356010	3129600	2616970	1362200	1142400	1811860	NA	1401880	1605390	1775270	944538	1106680	1494060
I6Y481	Rv0610c	Uncharacterized protein	-0.033908	0.613874	-1.00166	1.34402	0.769569	0.67522	1079580	1169220	1024890	1632360	2607490	1476310	1057610	793742	1387120	1605680	1142060	631083	NA	617514	NA	NA	550361	2111970	1874510	2120570	1134870
Q79FW0	Rv0812	Probable amino acid aminotransferase	-0.0343717	0.380031	-0.409238	2.00832	0.130973	0.269355	5834570	5777490	6122150	5102200	5530310	5864690	5683970	5631040	8209420	5651900	5302890	8112710	4877780	4683450	3034780	4455780	4245360	6315900	6337170	5650970	6962910
P9WK77	lppJ	Putative lipoprotein LppJ	-0.0345741	0.0503658	-0.341178	0.29936	-0.183928	0.107164	4042950	3804160	5360550	3519840	2749830	2979870	3203390	4670630	2397700	4475280	4765410	1518800	2178020	4203270	1897710	3515690	2041410	4656110	3418390	2778660	1248240
P9WKX5	Rv3679	Putative ATPase Rv3679	-0.0356837	0.0426822	-0.491868	0.3692	0.214127	0.254011	11401400	11349200	15446300	11827300	15263600	20370200	19119600	11053600	17318900	12462500	9559590	27470800	19346100	10643600	10757200	15293200	10950800	11386000	23530800	19340300	16071300
P9WL27	Rv2901c	Uncharacterized protein Rv2901c	-0.03588	0.0221594	-0.797612	0.959731	0.0456644	0.0506639	12828000	15181100	19677100	11705700	22764400	17157700	7429340	16505900	14493400	12117900	14468800	15123000	15362900	7334090	10133300	13123200	2180210	11504000	19834600	23984300	2556860
P9WKD7	rpiB	Ribose-5-phosphate isomerase B	-0.036142	0.240814	0.233406	0.335753	0.227689	0.154297	20710500	25966100	35327200	26440500	44653900	37185500	33174300	27932100	43546000	31487800	25021100	33219300	86984600	19170200	59818000	58278000	19721900	23391700	48886500	51575400	28804900
P9WLB7	Rv2313c	Uncharacterized protein Rv2313c	-0.0365922	0.411346	-0.204897	0.390358	-0.6039	0.918659	1759970	2693230	3035360	1836480	4353550	3225660	5172090	NA	3800680	1435970	837115	2959340	3244760	1387240	2594710	3442430	2672250	1245200	2104530	1889840	2590540
P9WFH9	Rv1729c	Putative S-adenosyl-L-methionine-dependent methyltransferase Rv1729c	-0.037128	0.346463	0.471994	1.59386	-0.810558	1.72264	1471900	1616520	1564250	1652310	2222780	1697700	1831570	1254730	1985690	1457920	1015670	1830740	1762740	2226530	1748430	3102500	2357060	808024	1073070	NA	942083
P9WG73	thiG	Thiazole synthase	-0.0382405	0.097792	-0.398664	1.37755	0.607991	2.45276	3039790	3093130	3168430	3687470	3633950	2398840	3929180	3307720	3686120	2370130	1855330	4652130	2863380	2868240	1932120	2239370	2567520	4810710	4165450	4847520	5182120
P9WGC1	Rv1339	Uncharacterized protein Rv1339	-0.0384828	0.445589	-0.458935	2.2529	-0.282602	0.944421	8565590	8002590	6903940	8553470	6848100	7104470	7321160	7682820	6736990	8170840	5863070	3877240	7519920	5829470	2800380	6606420	4823160	6307210	5730340	6575920	4915430
P9WN33	asnB	Putative asparagine synthetase [glutamine-hydrolyzing]	-0.0389108	0.10664	-0.67082	2.06895	-0.203549	0.152553	6185610	5242450	4514610	6853730	3001090	4945050	3900760	4627290	4395010	4559760	4999630	7100530	5986660	4017540	1610890	3090560	3121900	5277560	4129670	4459010	3838540
O69661	Rv3693	Possible conserved membrane protein	-0.0397544	0.00364829	-0.308702	1.21763	-0.438534	0.454508	8057680	7001780	7077770	8814450	4766400	7469210	6797460	7553600	6151950	6957260	8161180	6813540	6685670	7393570	1283920	5749760	5678970	7280090	5006320	5438830	5001640
O50461	relE	Toxin RelE	-0.0397613	0.0760134	-0.964809	0.638282	-0.584928	0.241041	2104540	2457300	3437530	2455420	5687220	3325290	4362780	2231970	5599910	2990510	1501420	3989120	3479280	1161310	2246090	3772000	289327	895645	4276090	3538180	434271
P71977	Rv1719	Probable transcriptional regulatory protein	-0.040365	0.0511702	-0.29705	1.6494	-0.0301055	0.00584092	6103520	5448970	6279010	6500890	5404220	6654280	6974070	5097470	6148990	7050030	5474330	6062540	7590870	5693640	2432690	4527520	6339940	6209560	6089120	5980420	6634200
P9WGZ9	rnj	Ribonuclease J	-0.0407832	0.0667316	-0.0567548	0.173893	-0.417514	0.173301	4265100	3803330	3257420	4492180	1432820	3407070	1720070	3192480	2078780	3825500	4408430	3324160	3300050	4226430	NA	3275640	2662860	3677410	2810800	2127730	2291040
P9WFT7	serS	Serine--tRNA ligase	-0.0409624	0.0065413	0.0759378	0.102268	-0.0227902	0.109301	5946040	5454610	5426580	5823320	2797350	4916990	5048750	5914050	4229770	5697000	5484380	2923870	5064960	6369110	1713360	5313960	6125770	7491700	4383460	4553700	6129360
P9WL93	Rv2569c	Uncharacterized protein Rv2569c	-0.0409886	0.0221594	-0.251138	0.64225	-0.10935	0.0968625	6266340	5130260	6000850	6435410	2740150	4617850	5293220	6005530	4284370	6503360	6454880	3580970	2967190	5214550	855626	3680530	6803120	5915730	3745300	3955560	5858130
P95257	secBL	SecB-like chaperone Rv1957	-0.042681	0.387867	-0.152848	0.0992424	-0.471032	0.88187	2290080	1951490	2099110	2290810	NA	2158050	1973970	1887380	770387	2312770	2245680	NA	NA	1914600	NA	1559580	3110280	1353030	1366530	1832630	1704790
L7N664	trxB1	Thioredoxin	-0.045251	0.334029	0.593003	0.00490118	0.481251	0.0745742	1517040	1937860	1195850	3126250	14636800	4327830	2694080	2341780	NA	1973870	2610890	3795570	3353820	3582760	3459740	4544650	5943540	2234540	3363190	4796480	4158430
P9WQH1	ackA	Acetate kinase	-0.0453079	0.0334571	-0.468916	1.04659	0.321454	0.534113	4827290	5945270	5859460	6047710	7177040	5980330	5329010	4567190	7456980	5740860	5107090	8688040	5782060	5182340	3417870	5173130	2672230	7429450	7897890	7428840	3917900
O53699	stf0	Trehalose 2-sulfotransferase	-0.0453866	0.119152	-0.179042	0.17672	0.302355	0.303715	18742300	20135700	18757000	18505800	24819300	26530800	23103200	14032400	27658600	16517600	12944500	22506600	31706800	12803700	22767600	25826100	11844200	20256300	29404600	32825400	15641500
P9WN77	gpsA	Glycerol-3-phosphate dehydrogenase [NAD(P)+]	-0.0456717	0.207141	-0.303831	0.0789995	0.0370641	0.337742	10139300	10330200	10703200	8721040	6779150	9480010	5484030	10260900	9251910	8723320	9575170	9117290	8837620	11236400	7209750	8149730	6279020	11691200	9474970	9978460	7556450
P95137	Rv2955c	Conserved protein	-0.0462914	0.282372	-0.451273	0.945351	0.346658	0.828275	11650800	12381300	14657800	12496500	11805900	15514000	11916600	7720960	16430900	9174140	9791460	14332800	14189200	5868330	10509700	11657600	7601600	12046000	18364100	22046800	13124300
I6XF92	Rv2765	Probable alanine rich hydrolase	-0.0464949	0.213512	0.277685	0.252489	-0.0110718	0.0303495	3058160	3901010	3496400	4364020	1796060	3188210	4001060	3198870	4001920	4847100	3572160	154780	2182830	4253750	2790400	4337480	4223260	3565040	3355250	3374300	3909060
O53613;O53726	Rv0068;Rv0439c	Probable oxidoreductase	-0.0467297	0.593841	-1.1372	1.90237	-0.183832	0.0770392	24982400	13108700	26706100	22571800	9560840	23796400	16523100	21431200	27818700	19084700	22273600	36797000	18063300	10731500	5924490	13002300	9792630	13490000	19266500	20987200	20476200
P9WLX7	Rv1424c	Uncharacterized protein Rv1424c	-0.0473718	0.399654	0.379329	1.04605	0.143965	0.238231	2867680	1926500	2362330	2261330	1872390	1829640	1993040	1927050	1795010	1930270	2246880	1982080	1575380	3138070	NA	2325730	2592420	3131330	1945360	2173310	2231060
P9WMU7	Rv2212	Uncharacterized protein Rv2212	-0.0477531	0.374569	-0.593801	0.415067	-0.708941	0.482345	3500270	3434810	5267550	3215060	6132330	4875280	5597580	3947830	5928560	4062570	3101490	5370530	14329400	2664650	3113910	3642600	3346760	1860450	2810620	3154470	3388180
Q79FX6;P9WPB7;P9WPB3	cmaA1;mmaA2;pcaA	Cyclopropane mycolic acid synthase 3	-0.0482578	0.0331967	-0.0403529	0.125903	-0.131872	0.0314794	14742300	10863000	18395400	11235900	3556350	17137600	11850800	11280500	9147340	11641400	11066500	16579400	19724400	8809440	5110330	14238400	21874500	9131740	9205380	12425800	22510300
P9WIU9	nusG	Transcription termination/antitermination protein NusG	-0.0484356	0.144793	-0.356241	0.312819	-0.0623093	0.0411618	118406000	110131000	104714000	120208000	83471200	127278000	106711000	153580000	89072900	160434000	123917000	70431400	85113800	146943000	41502500	100219000	71849100	117896000	118812000	93055500	79268400
P9WQA5	Rv2971	Uncharacterized oxidoreductase Rv2971	-0.0489284	0.1416	-0.508977	0.896415	-0.389538	0.389156	54242900	47810900	53983900	51533400	26970800	41636600	31152300	53083800	41693600	57323100	50739600	30914900	40009700	44304300	18244500	39395000	27800400	39595500	35637300	37357900	29594100
P94996	pks7	Probable polyketide synthase Pks7	-0.0490658	0.11955	0.240882	0.342825	-1.1897	2.64518	1079980	538252	1040030	969203	1333300	1013070	860083	855844	916080	1556610	1303050	723851	1042310	1197160	NA	923279	1405320	531608	170872	356640	534191
I6Y8B5	echA3	Probable enoyl-CoA hydratase EchA3 (Enoyl hydrase) (Unsaturated acyl-CoA hydratase) (Crotonase)	-0.0519445	0.202047	-0.515136	1.32577	-0.332029	0.0727569	47241100	41967000	41163100	41993300	32056900	43840000	34663600	40784800	34539700	39784000	40180900	52148600	59922900	40519400	9061790	27854500	30876400	50699900	33057700	33621000	31853800
I6Y8Y8	mog	Probable molybdopterin biosynthesis Mog protein	-0.0521104	0.17594	-0.121409	0.188038	0.220436	0.269355	6791790	7354870	8804480	7189360	8478530	10122300	7659340	6518340	9252500	6910170	5188770	7865070	10135200	5924960	6045170	9987160	8037130	7273310	11370700	8535440	9312130
P9WGY1	frr	Ribosome-recycling factor	-0.0521829	0.262297	-0.48652	0.648205	0.441112	0.353319	84693000	116229000	120383000	94432300	195013000	159170000	166609000	77852800	152249000	110492000	72565800	121721000	189918000	68854400	102991000	130143000	66508800	104855000	212588000	192827000	134049000
O53419	echA9	Possible enoyl-CoA hydratase EchA9 (Enoyl hydrase) (Unsaturated acyl-CoA hydratase) (Crotonase)	-0.0523401	0.00318086	-1.08677	1.86531	-0.273777	0.0882239	17205900	15394700	17241700	14819300	9672020	13282100	12444900	18395300	11121500	17461100	17813500	7587920	9051530	8922370	3523520	10061800	5031920	18651600	12584100	11931500	6116960
P9WGT3	mabA	3-oxoacyl-[acyl-carrier-protein] reductase MabA	-0.0533339	0.00379055	-0.0825025	0.0034932	0.437438	2.57821	34061400	31094300	33554500	27573500	36729100	35687100	39619400	31518200	39400600	30500200	31182000	40502200	34132200	34942200	28656400	41058000	29394200	39822800	56080400	52428900	38991000
P9WMW5	wecA	Decaprenyl-phosphate N-acetylglucosaminephosphotransferase	-0.0540528	0.166559	-0.861897	1.17909	-0.780424	0.96505	3295470	2760850	3473750	3839570	1624540	3212770	NA	2328040	1126470	3185360	3083550	3535960	3915810	2322310	NA	1790510	1333670	2149510	1639560	2684960	1280740
P9WIJ1	pdxH	Pyridoxine 5'-phosphate oxidase	-0.0544749	0.233306	-0.52594	1.46791	0.518442	1.54063	11839400	12073900	11225500	10940800	16245000	14108200	12770700	11053000	14698300	12200000	8858320	10858200	12806100	9234510	7536290	10594400	5949000	14417000	20172500	20489600	10584500
P96271	ctpH	Possible metal cation transporting P-type ATPase CtpH	-0.0551288	0.00502897	1.61196	2.46523	0.768784	0.779297	1747900	1145410	1407320	1809760	820238	1391650	1212090	NA	NA	1350140	1328810	NA	NA	5490380	1652920	3985930	4521710	3767500	1777890	2390170	2352110
P9WG33	tal	Transaldolase	-0.0552578	0.0679664	-0.571459	1.21842	-0.329249	0.212533	67587400	54599100	59614400	61716500	27883500	49997100	51609400	70223600	44559000	70916800	60535800	32943500	40382000	53913800	6406110	32674700	40808700	56685500	39926000	37800000	46990400
I6Y1I1	Rv2695	Conserved hypothetical alanine rich protein	-0.0553769	0.112569	0.432828	0.180554	-1.40988	1.45597	1696520	1193140	2293000	1739200	4475450	2138380	3012240	1200300	2574930	1582770	1059150	2532940	4795260	1879880	2595010	3419990	3178090	500426	811027	798497	1262960
O08343	tatD	Uncharacterized metal-dependent hydrolase TatD	-0.0554603	0.193315	-0.535989	0.968251	-0.22022	0.142281	3122210	2718500	3449470	3097310	1905620	2939730	2528470	2873420	3102220	2784310	2526930	2049050	5327640	2229680	1313280	2554350	1825300	3111900	1980960	2570690	2476440
P9WNL3	der	GTPase Der	-0.05624	0.0173855	-0.249747	0.504071	-0.0616066	0.0663214	3087960	3730750	3448630	3970470	2778210	3459980	2544080	3025830	3344400	2887520	3289160	3493740	4124720	3358210	NA	2304370	2900450	4122040	3390690	3218240	2393180
O06542	echA10	Probable enoyl-CoA hydratase EchA10 (Enoyl hydrase) (Unsaturated acyl-CoA hydratase) (Crotonase)	-0.0563485	0.356337	0.10288	0.0962461	-3.45691	3.77314	4388850	5261100	5942710	5316370	7678810	8221480	8765860	3458480	6522580	4907570	3699300	9103860	7813280	5857750	4722930	6906180	8022140	541190	512573	NA	1403260
P9WLZ5	Rv1366	Uncharacterized protein Rv1366	-0.0566201	0.0743371	-0.59199	0.126688	-0.0177598	0.241756	1157660	1222780	3847210	1481320	2395270	3838780	1298530	1029940	NA	1141720	1706900	3840290	NA	982748	2408830	NA	700134	973583	1952810	8894290	964878
P9WKI9	suhB	Inositol-1-monophosphatase SuhB	-0.0581338	0.0154481	-0.675216	1.45467	-0.344573	0.212533	4673950	4775660	4428240	4447780	3215090	4412390	3927470	4623650	3076380	4787070	3883050	2894010	6282190	4114750	985243	3096910	2449360	4783130	3453020	3521820	2523970
P9WJN1	mca	Mycothiol S-conjugate amidase	-0.0587174	0.0381877	-0.0865528	0.213894	-0.677657	0.337742	9119490	10019800	9374140	9608910	6541680	8070300	7010480	9814930	5562880	8755780	8916700	NA	6755580	11574800	1795940	8047820	9129110	9767290	5060150	5329220	6073420
O53903	fadD24	Probable fatty-acid-AMP ligase FadD24 (Fatty-acid-AMP synthetase) (Fatty-acid-AMP synthase)	-0.059223	0.0743371	0.395078	0.356654	-0.157344	0.00561092	2347730	2452300	2323140	2300150	1086850	1861010	1664640	2503980	1574630	2459740	2463720	1955540	1505270	3262900	712720	2786560	3798350	2628130	1413840	1697880	2427090
P9WQ37	fadD13	Long-chain-fatty-acid--CoA ligase FadD13	-0.0593984	0.0759118	-0.650986	1.34402	-0.909996	1.80134	4598070	4626720	4257900	4253170	3524740	3754650	2395760	4005620	2880700	4562250	4332370	2471640	4157610	3503860	1645000	3343040	2074180	3327580	2280410	1563350	2246550
P9WMZ5	pimA	Phosphatidyl-myo-inositol mannosyltransferase	-0.0596787	0.247987	1.27366	4.12825	0.785295	1.65013	2454800	2833630	2356680	2903110	2910070	2350910	2966170	2066840	3115970	1841970	2321640	6363590	4578720	6375040	4653570	7992580	7326910	4036480	5381030	4862280	4904930
P9WQH7	accD5	Biotin-dependent acetyl-/propionyl-coenzyme A carboxylase beta5 subunit	-0.0597512	0.343858	-0.706341	0.400078	-0.931453	0.438268	63781000	55014200	59487300	57130200	21680700	44441900	41045300	74307600	44200400	61364100	75031600	37305800	42637100	66315800	12491000	38931600	28501800	51710600	27622800	30068400	23623300
P9WHT1	apeB	Probable M18 family aminopeptidase 2	-0.0602615	0.0612827	0.219589	0.101228	0.0180739	0.142009	6710200	5731640	6618200	6118590	3966930	5714500	6533900	6871410	5956050	6046010	5780510	5747330	5431630	7886000	3064180	7424320	6824670	7769000	5631160	5971800	6419650
P9WPW7	argG	Argininosuccinate synthase	-0.0605906	0.0280639	-0.915284	1.30479	-0.123782	0.0876114	17810500	14137400	16685600	15046200	10682100	13339200	10535700	18197100	11715800	16433400	15396100	10528800	9951670	12727200	2557380	8935190	6057230	23298600	12513400	13436600	8135200
P9WQ41	mbtM	Medium/long-chain-fatty-acid--[acyl-carrier-protein] ligase MbtM	-0.061443	0.0659445	0.768415	0.632607	-0.182874	0.107121	1483330	1044670	928192	1487010	NA	1116750	1788280	1440900	1001600	1272020	1219650	1356260	749225	2815470	711740	1613500	2848500	1417950	872581	550905	2015710
P9WG37	kdc	Alpha-keto-acid decarboxylase	-0.0615669	0.0727143	0.236566	0.157279	-1.55995	1.3428	12958900	12779700	13640900	15222400	7395110	11760300	9272630	16259300	10456800	14034800	15112200	7228540	9069270	21049300	2823030	15739900	14373800	6197700	3967080	3622060	4701720
Q10782	Rv1544	Possible ketoacyl reductase	-0.0628334	0.0145314	0.0657782	0.17672	0.0617994	0.107411	91280800	128305000	110157000	96719200	139279000	137565000	161341000	75242100	198350000	94730800	71750000	185546000	150943000	97287700	171293000	196745000	55773200	101756000	185582000	166085000	70371900
P9WHR9	Rv3671c	Serine protease Rv3671c	-0.0639996	0.0869671	0.455668	0.141873	0.0908986	0.0095447	8435810	9089120	6308830	6894080	4586680	6070430	7904030	7839050	3715770	9767020	6561960	3664990	6627910	9454660	NA	4922850	10355700	9706390	4442620	4978460	10317200
O07412	yrbE1A	Conserved integral membrane protein YrbE1A	-0.0641236	0.294631	-2.11721	1.19167	-1.49266	1.17386	2858370	5671230	2743690	2068960	466124	2134390	968156	1701040	NA	2434350	2144330	1263640	2041600	NA	NA	765854	218069	1434920	552303	964632	226498
P9WFU1	pheT	Phenylalanine--tRNA ligase beta subunit	-0.0647396	0.180359	-0.333784	1.14622	-0.397959	0.349768	14365500	12321000	11467200	13383200	8254950	10443000	10666000	12191200	9736790	12784500	12618600	7158260	7119420	11983000	2238900	7421760	10775600	12366700	7865600	8018330	9387300
P9WNN1	tuf	Elongation factor Tu	-0.0662275	0.0854918	-0.799115	2.04588	-0.184188	0.107164	1119200000	999041000	1069940000	1088450000	715560000	1100950000	1083230000	1156290000	919876000	1321980000	1149380000	882621000	883745000	793120000	280353000	806800000	451948000	1211970000	987133000	919664000	440261000
P9WME1	Rv0196	Uncharacterized HTH-type transcriptional regulator Rv0196	-0.0665861	0.0316402	0.0924998	0.0567278	-0.109155	0.0771551	2993920	3633490	4217710	2916470	7170540	4937100	4665200	2883130	4821720	3233220	2592110	5681900	7476390	2768120	6225860	6350040	1579440	2458970	4879770	4914810	2940970
P9WLN5	Rv2001	Uncharacterized protein Rv2001	-0.0666767	0.0024224	-0.543125	1.24532	-0.0712474	0.147485	3855880	3557370	4220780	4608670	2854730	3827410	2859400	3865820	2872200	3385180	4446720	3613870	3695220	3559400	942686	3076440	2176930	5380390	3696260	3589710	2970640
P9WH21	Rv3818	Putative Rieske 2Fe-2S iron-sulfur protein Rv3818	-0.0673201	0.0024224	-0.0452254	0.223214	-0.257685	0.107411	8513370	8537410	7894360	8453010	3287140	7700260	8002500	8692040	7128530	9034100	8146790	4884130	5731280	7710250	3008350	8655260	7800810	8652840	5622410	5949410	7437640
P9WFV1	leuS	Leucine--tRNA ligase	-0.0677705	0.043732	-0.341707	0.280372	-0.650625	0.212744	11613800	9820940	10920500	11166900	4784920	8666080	6326390	11479500	6364890	10167900	11997800	5671600	8572640	12267500	1371560	9056350	6443200	10651800	5739430	5847980	6663980
P96284;I6XD69	pks12;pks15	Mycoketide-CoA synthase	-0.067908	0.191087	-0.386732	0.1518	-1.84736	1.80134	2130330	1550590	2655050	1711810	NA	2919500	1139490	2421360	961644	2165510	1832740	838942	NA	2463650	NA	1469350	1095320	865662	427826	NA	533867
O53181	korB	2-oxoglutarate oxidoreductase subunit KorB	-0.0694098	0.00406948	-0.331611	0.943549	-0.586545	0.786896	13778900	11513300	13190300	14408000	7180150	10536500	10125400	12949900	8872420	13878900	14686800	8995090	8644790	12452100	2551670	8833060	9465000	10224000	6948440	7361700	7972540
P9WFC9	Rv1636	Universal stress protein Rv1636	-0.0696812	0.949263	-0.691114	2.01591	-0.223468	0.609204	242674000	285480000	298994000	252097000	445286000	423409000	484181000	231180000	328368000	282837000	162988000	286955000	321903000	182468000	187911000	261062000	138642000	209651000	360882000	302528000	147732000
P9WN85	zur	Zinc uptake regulation protein	-0.069953	0.0823971	-0.00725386	0.046951	-0.837101	1.03322	3427460	3265580	4033680	2919860	2658770	3826860	4386480	3016120	4550190	2967570	2416170	3569820	3514350	2122050	4698490	5466350	896280	1485210	2665200	2351950	858551
P9WN27	glnE	Bifunctional glutamine synthetase adenylyltransferase/adenylyl-removing enzyme	-0.0702234	0.121421	0.433784	1.14946	-0.245842	0.428179	5969230	5991670	5858570	6750180	5479350	6713980	5503750	5085270	5622340	5406170	5748930	6839200	6492510	8582150	4754600	9181470	7543980	5718670	5145540	4595290	4922440
P9WFP1	Rv2366c	UPF0053 protein Rv2366c	-0.0706584	0.13682	-0.430686	0.717964	-0.70765	0.918659	2399210	3234900	2155850	2941140	NA	2660980	1297280	2664710	NA	2153620	4122920	1619390	NA	1877100	NA	1394170	2300980	2028120	1372280	1456330	1642110
P9WFX5	trpD	Anthranilate phosphoribosyltransferase	-0.0713492	0.177966	-0.435601	2.59238	-0.184602	0.286029	9079530	7879610	7910770	8414080	6898730	7921250	8145050	7482490	7678270	7595570	6937340	9330600	7191120	7462880	3617180	5261330	6452390	8522980	6767620	6943000	6996690
I6WZH9	Rv0817c	Probable conserved exported protein	-0.0716192	0.0426822	-0.534301	0.243886	0.420236	0.899863	1704320	1271590	1498020	1832700	917397	1682050	781118	1498490	1447440	1713380	1084180	1351870	1403500	1342180	726565	1770620	662592	2237940	1877920	2131220	870224
O53361	sapM	Phosphatidylinositol-3-phosphatase	-0.0743488	0.0839842	0.726543	0.725649	-0.474269	0.0498793	1375990	956425	2544300	952681	NA	2401090	2414780	842915	3701970	1421760	659126	2165600	5197510	705492	5958240	5196370	1053450	NA	1756940	1359430	936855
P9WHM7	purH	Bifunctional purine biosynthesis protein PurH	-0.0748454	0.00379055	-0.54958	0.485306	-0.45428	0.111282	23761700	24277600	25008800	29835000	9282950	22736400	20369800	25617100	20317000	23083300	26605100	11502300	22037500	26849800	8327060	17094200	15374700	29770300	13226000	18418100	16268000
P96831	fadE2	Probable acyl-CoA dehydrogenase FadE2	-0.0772098	0.0124469	0.45576	0.501113	-0.274252	0.202228	15006600	14408700	14079000	15967000	9088690	12717400	14884700	15450300	11913100	15390300	16839200	9980070	11925400	21584100	7433900	18683500	20839700	12867300	10537400	10961200	13844800
L7N650	pcd	Aldehyde dehydrogenase (NAD(+))	-0.0773856	0.0511702	-0.142717	0.323791	-0.120467	0.0792182	6025950	4900490	5389560	6795030	2459660	4300770	4790680	5582290	3706820	6031030	5851520	3004310	3522650	6344940	1970320	2738200	6139640	6319950	3272240	3530420	5485400
I6Y4U9	Rv0799c	Conserved protein	-0.0786192	0.133384	0.0902364	0.280799	-0.33036	0.964754	4469000	4739910	4861250	3905150	4119900	4065690	5463440	4158810	4305150	4063480	3774580	4491020	5139990	5018870	4496030	6384670	2668950	3504970	3603760	3942870	2229790
P9WNW3;Q84IT9	dnaA	Chromosomal replication initiator protein DnaA	-0.0796339	0.824659	-0.928876	4.4453	-0.851506	4.45049	9766170	9622850	13147300	10722400	7191700	13648500	9498690	9167000	9653380	9316410	7101360	10666500	8457780	4540880	5718820	6952590	4497300	4662260	5941920	6014910	4883020
P9WJH1	nuoB	NADH-quinone oxidoreductase subunit B	-0.0799732	0.0139551	-0.0550427	0.0519706	-0.197216	0.00286609	33632800	63944800	63963200	42990800	82279500	78610700	67554800	32309000	98175800	46687400	29874200	74340600	126575000	37688400	85449200	95434000	23033100	37683300	73340300	87891900	38241200
O05436	Rv3909	Conserved protein	-0.080324	0.221339	0.167653	0.00477983	0.049288	0.0545291	4214130	3736020	4515140	4520670	2846840	4270720	4978140	6988690	NA	1090190	NA	NA	NA	4950670	1536660	4643330	6625250	4698550	3601520	4139740	6385650
P9WPY5	aroA	3-phosphoshikimate 1-carboxyvinyltransferase	-0.0808465	0.0890485	-0.0860272	0.29936	-0.619407	1.09099	9054730	8492580	8490060	8765600	3847750	8059270	6994300	8476050	7914090	7539200	6911300	8596600	8140660	8251650	3277000	7745550	8881550	6581330	4234060	4509360	6543650
O06312	mgtE	Magnesium transporter MgtE	-0.081746	0.138789	-1.22554	1.15261	-1.63667	0.786291	357275	768903	441836	572689	1062410	633107	289775	559388	383889	522895	598288	NA	NA	244904	NA	386963	155719	585318	NA	184176	70497.3
P9WLH9	Rv2226	Uncharacterized protein Rv2226	-0.0817966	0.0381877	-0.432053	0.911206	-0.235074	0.0621492	22072400	19538600	18866200	20768600	12226300	18738000	16915700	21411300	14241300	22440300	23069700	11794700	11605900	18968700	4614890	16349200	11618300	21854100	15851700	16207300	14157500
O53651	Rv0200	Possible conserved transmembrane protein	-0.081997	0.0481443	-0.206965	0.052257	-0.362644	0.0772978	3647150	4185990	4265530	4291760	1883880	4177210	3100160	1773540	3865320	4190430	3273960	4027510	5735300	4958170	2316240	4816320	2421600	4079710	2838340	3205390	3292160
P9WPK7	egtA	Glutamate--cysteine ligase EgtA	-0.0822646	0.126134	-0.408033	0.066267	-0.648555	0.334558	2539050	3516580	3016080	3028840	1859230	4102740	1752520	2739080	7333790	2958740	3130700	1371790	2206840	2677110	1377180	5749180	1869030	1889430	1467300	1958600	1968440
P9WFX7	trpC	Indole-3-glycerol phosphate synthase	-0.0822899	0.0983303	0.154213	0.20859	0.224745	0.175973	104231000	129097000	136816000	101926000	123730000	160495000	143883000	88638000	223982000	82458000	65555200	155241000	293262000	90807000	196515000	225304000	60446500	106243000	195475000	209666000	91562400
P9WJY9	metXA	Homoserine O-acetyltransferase	-0.0827333	0.0381877	-0.0629187	0.0613866	0.279357	0.678916	1579690	1466820	1706470	1546120	1403760	2065750	997745	1546570	NA	1323980	1459950	2316600	1250310	1480140	NA	1624630	1174400	2448050	1414450	2019260	1733650
P9WH65	rpsK	30S ribosomal protein S11	-0.0827937	0.00379055	-0.468976	0.312819	0.223499	0.250572	56564300	79456600	100411000	54973300	96387600	115888000	56280300	50470700	146033000	50540400	38693100	126979000	99509800	38267400	76543800	84720100	15158500	62858000	154255000	122683000	38347000
I6Y4V6	purM	Phosphoribosylformylglycinamidine cyclo-ligase	-0.0854056	0.137427	-0.515861	1.09739	-0.473066	0.389714	9628830	9763870	10601800	9974490	4679050	8994380	5748110	9952390	7388930	8831710	10022400	9319010	7362310	8129980	3417800	7261250	6207080	8161250	7142970	6730860	5824380
I6Y3Q7	Rv3510c	Conserved protein	-0.0861794	0.09139	-0.813927	0.943549	-0.120518	0.0234625	3551130	5212080	5106160	4187540	5324340	6508480	4070910	3920460	5520440	4099710	2733910	6229410	5645990	2577790	3231300	4986690	1544580	3816020	6748500	5577860	2477230
P9WKG7	ispE	4-diphosphocytidyl-2-C-methyl-D-erythritol kinase	-0.0863715	0.454855	-0.109672	0.330867	0.0223852	0.308925	4012970	4073990	4273780	2990840	5566330	5709830	6735090	2257280	5839900	5490190	2703700	3592450	4458400	2705410	2597800	5216460	6607710	2303580	4555930	4125290	4605270
O53149	Rv1458c	Probable unidentified antibiotic-transport ATP-binding protein ABC transporter	-0.0869124	0.0646849	-0.633429	1.70876	-0.467283	1.24984	3770070	3824840	3594240	3694310	2182100	3466060	2994140	4022690	2696590	3551550	3216660	2960840	3622620	2968290	1807600	2826400	1760280	2848290	2476780	2722830	1654110
P9WFS9	valS	Valine--tRNA ligase	-0.0877728	0.0483254	-0.305839	0.398488	-0.319597	0.0461469	25700200	19594900	20554300	23174700	11544500	19869300	17338100	23727300	11097600	22696000	24435900	11635800	14697000	25814200	2773360	16069300	16078100	28343500	13429400	14360000	17482300
P96834	pntB	NAD(P) transhydrogenase subunit beta	-0.0882986	0.121421	-0.575833	0.66587	-0.116026	0.166485	23826300	21768200	21049000	25056300	11923200	18951000	15136900	23533900	16614600	22591900	28298400	17006800	16631200	22600700	5555930	15092300	13151200	31615300	18894900	19950000	15547200
I6X811	dppA	Probable periplasmic dipeptide-binding lipoprotein DppA	-0.0885367	0.0528143	0.0568829	0.00158351	0.276383	0.269355	1458360	1090740	1484910	1014920	404380	1072010	1322750	1492790	NA	861255	1029680	1021950	NA	1755140	463041	1133660	1135550	1825010	913602	1591120	1050990
P9WK63	lpqE	Putative lipoprotein LpqE	-0.0887961	0.382221	0.1292	0.207819	0.692739	0.138172	58508100	58054200	65805100	51643800	71469600	81743100	170398000	38786300	69809000	53945000	36534900	100197000	92435100	50521900	64372000	79568400	81784200	47350800	110433000	102295000	120452000
P9WHL3	pyrC	Dihydroorotase	-0.0890542	0.0423004	-0.17158	0.561178	-0.108742	0.0343686	8159840	6163760	7529630	6656990	3346180	6369350	6588420	7734050	4352470	7795830	7047780	3278020	5340280	7272240	866406	4706010	6993310	8382060	4675430	4797980	7422170
P9WG81	folD	Bifunctional protein FolD	-0.0900604	0.00399745	-0.114047	0.318159	-0.157133	0.00879826	18560000	13697900	15426300	18493100	5010810	13303200	11954900	18409600	10176200	15561700	16208400	9421090	8664590	17209700	3751800	9950810	15362700	19987500	9495890	11712100	12856600
P9WQC5	adhC	NADP-dependent alcohol dehydrogenase C	-0.0902671	0.149933	-0.71707	0.425255	-0.574224	0.0461702	67188000	56073100	57974900	57411700	27601600	45643800	36940600	71876400	42108100	63236300	66714800	32072400	40042900	65926400	10583100	39222600	28999500	72965600	38092500	37230200	31250800
P9WPL7	cyp141	Putative cytochrome P450 141	-0.0903809	0.102701	0.654029	0.313482	-0.515791	0.0930072	897970	859057	1148070	966616	1090710	1069560	855190	774141	NA	910393	907918	NA	NA	1530290	577665	1621210	1511760	594346	676354	2386920	675767
P9WFS1	deoA	Thymidine phosphorylase	-0.0906085	0.0423004	-0.162458	0.20656	0.306099	0.926047	2460510	2667930	2658630	2662070	2962630	2574890	2436820	2420490	2368770	2573090	1886150	3474230	2925640	2969870	1804440	2946540	1610200	3627000	3363090	3210960	2338830
O86346	Rv0939	Possible bifunctional enzyme: 2-hydroxyhepta-2,4-diene-1,7-dioate isomerase (HHDD isomerase) + cyclase/dehydrase	-0.0912553	0.0153261	0.278988	0.104419	-0.587549	0.269355	3196750	3028280	3089530	2680220	936899	2601140	2947170	3236990	2552740	3341900	2980310	1374480	1480830	4067770	710227	3426720	3725140	2595700	1925910	1569680	1996610
P9WHH9	lpdC	Dihydrolipoyl dehydrogenase	-0.0917248	0.0117059	-0.293522	0.513862	-0.264371	0.112139	61719700	51961200	59147600	63185700	20386900	46791600	41768600	56910400	40610400	58127600	63096900	36665900	35661900	59092600	10080200	39043300	45747800	57803900	33264200	39628200	46893600
P9WJN9	mraZ	Transcriptional regulator MraZ	-0.0921625	0.0743371	0.684377	1.47299	0.133782	0.0811136	22570500	32474500	37031900	27145500	53082700	42155500	42417300	22913100	47300800	22801200	22774800	50061400	46567300	35571300	82298900	90926800	36722200	23792300	55219300	50823400	30436900
P96235	Rv3843c	Probable conserved transmembrane protein	-0.0923221	0.108243	1.20971	3.71155	-0.152825	0.0442572	6321840	7283540	6490630	8485850	4172530	5399820	5826510	6491740	5425020	6434900	8455920	3024600	3104510	20715500	8846460	14078100	15165700	6738040	5400950	5336340	5971880
O06797	Rv1762c	Uncharacterized protein	-0.0925384	0.0642948	0.0446356	0.321634	-0.677323	0.477544	4502980	3843130	4878330	6786150	2762850	5037070	5864860	3994970	2367530	5155520	5524600	7660250	3185030	5851640	389633	4211600	5959170	4485390	2844470	2562150	3256610
O53323	Rv3173c	Probable transcriptional regulatory protein (Probably TetR/AcrR-family)	-0.0948446	0.0889484	1.73397	2.12519	2.11405	3.03463	3024580	3587240	3378520	3433160	5572170	4791070	4696460	2411370	4095060	2157760	2622930	4829040	4276220	6099500	15167100	17211600	8698220	7269460	20808100	18449800	12608800
Q50732	Rv2566	Long conserved protein	-0.0962756	0.083677	-0.472329	0.778629	-0.679937	0.880993	6283140	5404040	5780230	6323130	2732200	5602260	4424680	6992500	3460350	6521330	6288360	4192850	3810000	5141920	2727750	3542050	4534170	5091220	2600530	3011160	3982620
P9WJQ9	mobA	Probable molybdenum cofactor guanylyltransferase	-0.0963103	0.170556	0.372485	0.355518	0.166689	0.0200138	13940700	18858100	21465600	16518300	31664300	23131400	31096400	14882100	43217000	17140800	13579000	23018000	60937800	14716400	40861500	44028700	13263300	13127000	29643600	29844900	18545800
P9WGV9	ruvC	Crossover junction endodeoxyribonuclease RuvC	-0.0969812	0.020929	-0.635988	0.340319	-1.25056	0.973675	NA	592410	1842680	1798930	2834170	1810830	1024140	NA	1789370	1252250	1016700	2684360	1687540	1171390	1036440	1798150	1151490	482352	1451360	744126	773006
O33269	Rv0339c	Possible transcriptional regulatory protein	-0.0975037	0.111732	0.141006	0.12824	-0.361761	0.884097	1614180	1331060	1347030	1324840	1410260	1439910	1096910	1084590	2006550	1293270	1248890	1269110	1139360	1480510	776892	1490160	1566050	1148530	966771	967786	1128770
P9WPY7	argH	Argininosuccinate lyase	-0.0988847	0.0788204	-0.322361	0.744239	0.27098	0.685865	7417880	5818020	6073870	6660010	4267030	6002150	5708880	6952920	5076240	6132830	6334500	3557380	4672690	6136460	1982990	3645760	5954800	11504500	6687910	5710510	7796800
P9WKS3	Rv0738	Uncharacterized protein Rv0738	-0.0996288	0.138227	0.12591	0.209809	-0.280426	0.0921998	5746620	13505800	11126600	10034700	21492900	16181600	15812100	5737110	29865600	12360300	6039420	12848900	41069800	4613200	31063200	21799500	7675450	4216360	12592200	15302700	9647750
P9WLW3	Rv1509	Uncharacterized protein Rv1509	-0.0997293	0.0359259	-0.307033	0.0535213	0.104377	0.173777	2240700	2568830	2378050	2546640	2649360	2832860	1779480	1911440	3509220	1949410	1445350	4030180	2803680	1783320	2333590	3388560	1127660	1824220	3843710	3651210	1278150
O06179	Rv1533	Putative monooxygenase Rv1533	-0.0998484	0.11905	-0.752948	2.99819	-0.112438	0.0867353	10098500	9351090	9620160	9807320	5857230	10470900	8918710	8450690	10179300	9503050	7245110	8200850	9774220	6328070	3877140	7417770	5088940	9033600	9677840	8764150	6619330
O07752	glnA3	Probable glutamine synthetase GlnA3 (Glutamine synthase) (GS-I)	-0.100041	0.141354	0.120155	0.09288	-0.165906	0.0712807	4640990	2537390	4194820	3409140	1185720	3113670	3935390	3097490	2555660	5389360	4073620	3180750	NA	3705230	NA	2820010	4472310	3321820	2596880	2755780	4116640
O65931	atsB	Probable arylsulfatase AtsB (Aryl-sulfate sulphohydrolase) (Sulfatase)	-0.100044	0.123765	0.867569	1.28922	-1.43919	1.07589	2774270	3389320	2154460	2915220	945074	2284480	2166850	2846070	1642900	2131430	2525850	668544	NA	5290720	1736400	4104480	4231980	1566200	701924	825405	859513
P9WGP3	secA2	Protein translocase subunit SecA 2	-0.100154	0.0139937	0.321597	0.440591	-0.335062	0.0697797	15485700	14546700	15812900	15894700	9496920	13459600	12309300	14512900	11030300	14005800	16534800	12158600	13136400	24061100	6721540	20569200	15789200	17233200	10508500	11244000	11819800
P9WMI3	Rv0023	Uncharacterized HTH-type transcriptional regulator Rv0023	-0.100881	0.324016	-0.0908685	0.00162464	-0.0249594	0.0370214	3873290	3694440	5011740	4669630	7451960	5999660	6002620	2841430	4939090	4407440	3265700	5431810	7103530	3376730	4637820	7972800	4773800	3578380	5150130	6567260	4701430
P9WJP7	Rv1688	Putative 3-methyladenine DNA glycosylase	-0.101384	0.441013	-0.541834	0.478099	-0.0653337	0.0316226	2622710	2812940	3570630	2700770	2813180	3256130	2003270	2622050	NA	2280610	2428970	6357050	4813300	1724480	NA	NA	2139920	2556140	2820650	3840240	2092670
P9WHG5	parE2	Toxin ParE2	-0.101739	0.0139551	-0.403934	0.0864573	0.217882	0.0197819	918738	2183410	1610710	1357530	5346080	2395150	3348970	1587770	2771480	1343270	1146950	2481710	5893480	983958	3918600	2316460	739153	1957460	3121260	3267760	1184650
L0TAD5	Rv1703c	Probable catechol-O-methyltransferase	-0.101871	0.127927	-0.341814	0.409949	0.0883053	0.107164	12322000	16051800	17818500	14807300	15035600	18979300	16658900	13204500	16405500	14018800	13661500	18988400	15896100	10652900	14678400	18509300	8271780	14404600	19725400	20784400	9630070
P9WP51	cbs	Putative cystathionine beta-synthase Rv1077	-0.102071	0.222727	-0.418326	1.16376	-0.356263	0.200205	26688700	27075400	25047900	27492800	14248500	24335700	24440200	24185300	15816400	24974300	26000600	14139000	22488700	23694200	4591540	17591600	19894700	29435200	17267100	15934700	21867000
P9WG49	topA	DNA topoisomerase 1	-0.102606	0.00817146	-0.2576	0.707828	0.069603	0.275929	15009000	11771900	13964800	15021400	9827820	13352700	15070200	15087800	11390800	14621400	16999100	9268650	11061200	15171300	3032880	11573700	11788800	19088700	13989200	13764000	15320900
P9WGU1	pstS1	Phosphate-binding protein PstS 1	-0.102992	0.033766	-0.663392	1.16916	-0.187924	0.0157753	61350500	44565400	58120000	55988500	20878000	49438500	69283000	50893000	45664800	57286000	53368800	29326400	81161400	30736900	9895860	39964500	57386000	47917300	50383700	42555800	71589000
P9WMM7	hisI	Phosphoribosyl-AMP cyclohydrolase	-0.103869	0.282372	0.30897	0.214398	0.515089	0.294125	3558950	4641550	5671840	3852650	9828980	5868010	5026650	2885580	6189040	4677470	3624090	5168570	NA	3158140	8398020	9319330	4056240	3414980	8714390	10057800	5652600
P9WHS5	htpX	Protease HtpX homolog	-0.106184	0.032404	1.0367	4.99423	1.50625	7.87374	4432140	4281650	4816830	5987390	3742670	4500930	2890610	4542730	4856750	3704830	4120340	4114950	4054630	10383000	9686970	8498320	7356970	13322400	12823600	12357200	7780340
P9WQ83	Rv2294	Putative cystathionine beta-lyase	-0.106277	0.418784	-0.238878	1.37622	0.178936	1.06733	15832000	12929100	15439800	14297500	12785300	14354900	16340300	12576200	13848700	12822200	10889000	17294900	15717400	12338700	11780900	13581200	11990100	16202700	16298200	17255600	15963900
O05296	Rv1194c	Conserved protein	-0.10653	0.0743371	0.0456439	0.474397	-0.951824	2.55162	13245200	11814400	13470400	12841900	9120650	14125600	13581900	12147300	15020300	12457500	9341130	13071900	11260900	15513800	10102400	18487700	11828100	8642930	6566070	5943410	7128900
O06308	Rv0358	Conserved protein	-0.106558	0.0024224	-0.401733	0.346526	0.0187033	0.469127	1736010	1299430	1959590	1538700	NA	2073820	1764770	1771080	NA	1480450	1456250	2186920	NA	1276930	1012410	1732070	1372980	1574790	3781270	1971670	1377960
P9WFK9	Rv0566c	UPF0234 protein Rv0566c	-0.10703	0.247987	-0.421766	0.422985	0.113134	0.0829987	29047500	38052100	41225300	28311300	53031800	56161800	58622200	27588800	48079300	29529000	19194700	59541800	47026200	22623300	38926900	46425000	17462900	30123600	65027900	59052900	23942100
P9WMU5	Rv1422	Putative gluconeogenesis factor	-0.107938	0.020929	0.247767	0.546527	-2.80613	1.80134	10759600	10225700	8970200	9969070	13023900	11987200	12383200	8603420	11200500	8767450	7320780	15727000	15810600	10688700	13667300	17716200	11883900	NA	314334	9197830	1538390
P9WHQ5	psd	Phosphatidylserine decarboxylase proenzyme	-0.10889	0.102713	-0.263575	0.188535	-0.0880501	0.0425574	9524430	7299280	9481350	8548170	8690340	8807090	7284780	6044110	11519700	5897700	6246520	10739500	9870610	5624350	8854120	10273400	4620070	7101150	9250480	9947540	4850560
P72045	Rv3779	Probable conserved transmembrane protein alanine and leucine rich	-0.109077	0.23971	-0.570413	0.792405	-0.402503	0.220127	2563470	2497910	2250870	2462690	1198440	2465030	1381570	2298110	1820110	2268610	2936640	2513370	1844300	1627530	1464480	2074140	1689340	2091880	1748920	1977350	1681750
I6YCP7	Rv3662c	Fido domain-containing protein	-0.109816	0.111732	0.462261	0.359147	0.609638	0.27886	2726820	3462790	4365770	3585290	6670170	5523370	6235670	2361470	5929560	3572030	2010310	4519540	7933600	2900030	7926780	8329260	4102660	2604810	8207760	7939650	5383600
O06380	Rv3627c	Carboxypeptidase Rv3627c	-0.110023	0.0242875	0.128389	0.143589	-0.083208	0.0644488	9386620	7823720	8139570	7924270	6127050	7669320	5457360	7947300	6551200	9082630	8280960	5429370	6382480	11766100	3918650	8306330	8797450	9801700	6810400	7661660	7108840
O53369	sdhD	Probable succinate dehydrogenase (Hydrophobic membrane anchor subunit) SdhD (Succinic dehydrogenase) (Fumarate reductase) (Fumarate dehydrogenase) (Fumaric hydrogenase)	-0.110106	0.224235	0.0072806	0.0930561	0.300178	0.167513	5627870	6516670	4474380	7443070	1915740	4638010	3779570	4396360	3347820	4198060	4586580	3135790	4952110	6701550	1681680	5470650	3852300	8036100	4806850	6614680	1517830
P96826	Rv0149	Possible quinone oxidoreductase (NADPH:quinone oxidoreductase) (Zeta-crystallin)	-0.11029	0.0182575	0.146005	0.0934567	-0.454128	0.238231	11105000	10356300	9218340	12395700	4039470	7708010	9628550	10013500	6891790	11233000	12311500	7208770	7826310	13622400	NA	5857340	10654000	11708900	4689530	5311880	8744860
P9WI23	PPE20	Uncharacterized PPE family protein PPE20	-0.11097	0.207763	0.0490758	0.128608	-0.161398	0.0393406	4847880	5110850	8525670	4887320	11722700	10325300	10195000	5149850	21410200	4426750	2354610	10639100	21593600	3171370	10375300	16037600	7266050	1833790	11509500	8309270	6937330
O53370	sdhA	Succinate dehydrogenase flavoprotein subunit	-0.112698	0.131867	-0.768562	0.750718	-0.622374	0.138172	13319600	12358800	11996800	13485000	4619700	9903890	8613460	14177900	8726940	13463700	15152700	7605550	7577390	11951900	2159970	7848700	6235600	13307200	7065270	8521000	7018610
O07810	Rv3813c	Conserved protein	-0.113451	0.177467	0.195161	0.247593	0.203439	0.200205	13227800	14845500	11581800	14830100	18016600	14890800	18261800	13794200	13291700	17270900	13651400	6805180	18730500	18989100	11938600	15002700	25074700	18649300	15017800	15538100	19657400
P9WPZ5	dapC	Probable N-succinyldiaminopimelate aminotransferase DapC	-0.115021	0.161446	-0.481799	0.0780057	-0.201182	0.337742	4058070	3522180	3740790	4022870	2505560	4466970	3617160	3574190	2698550	4229020	3334070	3799000	2991190	2678720	NA	5046630	2278040	3510470	3430840	2542120	3076920
P9WFV3	ileS	Isoleucine--tRNA ligase	-0.115165	0.0362149	-0.607112	0.375623	-0.323629	0.00108349	12706900	10787700	10246900	10257100	3947480	8340750	8081760	11792300	7697550	11223900	13135700	5017620	5651100	10182200	5602580	5945390	7508990	14215500	6408760	6940070	9435650
O53329	Rv3179	Conserved protein	-0.115283	0.142748	-0.384915	0.434828	-0.462163	0.28225	3354490	3591240	3344980	3831790	3799350	2967340	3313810	2952510	NA	1949610	3096870	7052960	4637470	2939220	NA	2444820	2568950	3912670	2830190	2003490	2039840
P9WN21	glpX	Fructose-1,6-bisphosphatase class 2	-0.115455	0.0154481	-0.237533	0.399839	-0.16916	0.0921998	25768700	21938300	27880000	23190200	12597600	19598200	21260300	28235800	16822100	23680000	29667900	13338800	14065700	25750200	7612290	19012000	18203900	26641500	14811100	17370900	21651200
P9WHT3	pepA	Probable cytosol aminopeptidase	-0.116235	0.0120748	-0.453842	0.957596	-0.43777	0.156943	56251800	49113300	45165500	50869200	25860600	40912100	36334600	47197200	34331000	46436700	53250000	36902000	36819300	46985800	8915830	31376600	34573700	53984800	30476000	33331200	33357900
O50398	Rv3369	Conserved protein	-0.116684	0.0053129	-0.337942	0.226574	0.111438	0.0885183	20245500	17154800	19274700	14615000	19621400	21705200	15285600	18861700	16692600	16577600	12431500	20361900	23594900	15356500	15142600	23055700	5686990	19573700	22071400	24246700	5881200
P9WHL7	purL	Phosphoribosylformylglycinamidine synthase subunit PurL	-0.117119	0.0280639	-0.342792	0.326477	-0.741074	0.390433	16282600	15477500	13722700	15634900	4810730	12564800	11716400	14521500	10368400	14013200	14590400	8817660	11292200	17890900	3345110	9655780	11985300	13920100	7867560	7715520	8552850
I6YC03	ephB	Epoxide hydrolase B	-0.117331	0.0600064	-0.221901	0.145033	-0.0937322	0.0566971	5126890	4657990	4872640	4346430	2450880	4664920	5072680	3824140	4665420	4300550	3389450	5048300	NA	4036050	1753500	9935380	3963680	4451910	2788670	4291040	5433600
P9WPH3	cdd	Cytidine deaminase	-0.117588	0.0171726	-0.250531	0.484109	0.118706	0.510148	3021460	3784710	3659900	3399060	4133210	4126750	2650990	3615280	3131580	2928140	2488620	4004740	4821650	3512470	2640460	3521900	2577330	3946390	4001160	4239270	3885880
P9WFJ9	Rv0637	UPF0336 protein Rv0637	-0.117775	0.214767	-0.654653	2.3423	-0.136495	0.186328	31339200	36207400	40853200	28377100	21935800	33066100	24375100	27858700	31449600	28657100	28974400	30742100	28790500	21809800	18005300	27348400	17780800	27984800	29035400	31690500	24071600
O06820	Rv1439c	SnoaL-like domain-containing protein	-0.118455	0.0759118	-0.351595	0.127087	0.0360269	0.0522102	2405380	4708570	4531750	2281920	2082830	5153750	4163900	1484460	4609070	3062280	1420330	7479610	8108710	1416330	3753800	4294050	2772840	2185170	5653330	3507230	5031150
P96375	Rv1025	Conserved protein	-0.118493	0.0947869	0.0392403	0.0838028	0.149344	0.107411	3510110	4342880	4526600	3758870	6724560	5801360	4853420	3110400	8296800	3541020	2456050	4798330	11921100	2723380	8161970	6579440	2084550	3754040	6286550	7878820	3547310
O53498	cobN	Cobalamin biosynthesis protein CobN	-0.119494	0.329504	-0.267069	0.991186	-2.23646	3.71747	4811790	4865800	4152130	5560820	3131000	3940850	4067070	3759320	2920740	3884840	4390050	3080700	4541460	5119340	652731	2724870	4176020	1504030	516846	702540	1059680
P9WIV9	nuoG	NADH-quinone oxidoreductase subunit G	-0.120108	0.0616229	-0.204494	0.359147	-0.318288	0.0607158	44110000	38059700	37778500	42725500	16731000	31358600	31329800	45770300	27474500	42046900	49885400	18243600	25475600	42686800	5547480	25934400	39637200	46721900	22125800	24873900	35724400
P95103	Rv3055	Possible transcriptional regulatory protein (Probably TetR-family)	-0.120778	0.284049	0.722411	0.903267	0.174031	0.132991	2521510	2352320	2596990	2477420	4447070	4251610	3910630	1105960	2406920	4634360	1028420	2369940	5270550	3131850	5238360	6662530	3331380	1459200	3443900	3243060	2616820
O53901	pks5	Mycocerosic acid synthase-like polyketide synthase	-0.120848	0.133502	-0.795518	1.4441	-0.704649	0.813238	31405500	33384600	30899200	31890800	12715600	25692000	21183000	34434500	26130000	30702700	34098800	21349600	19033500	24574200	6740020	16249300	19355000	24349000	12902000	18544500	19374500
P9WF09	relK	Toxin RelK	-0.121916	0.0804734	-0.348966	0.38474	0.290176	0.339884	243745	518263	1495670	721374	2763670	2158440	2610090	NA	1730500	1018440	608517	1989010	NA	411857	1409140	NA	1174320	NA	2590010	1828890	1716290
P9WL17	Rv2926c	Uncharacterized protein Rv2926c	-0.122985	0.46253	0.848982	2.4482	0.875218	2.32526	3332170	5119310	5040800	5554220	7952530	6130150	4421810	4700990	NA	NA	4844640	1511360	NA	11183400	6657390	11280300	7258700	10167400	10510800	8613150	7308540
P9WMR1	helY	Probable helicase HelY	-0.123805	0.0944752	-0.136885	0.480171	0.0692166	0.139856	3308610	2843060	2800330	2791840	2085230	2753720	2523230	2811770	2683440	2369180	2441060	2856860	2208250	2624960	930489	3133060	2453290	3597500	2490530	3367570	1946860
P9WG69	fadA4	Probable acetyl-CoA acetyltransferase	-0.124127	0.0664563	-0.222745	0.652314	-0.240207	0.107121	22627200	18419300	20315700	21992600	11486900	20013900	20319000	20081500	16709800	21984800	20954400	13149900	17200200	20788400	4667890	19729000	15089400	20852600	16253700	18145800	13983800
P9WMS1	dhmA2	Haloalkane dehalogenase 2	-0.125083	0.0394629	-0.593451	0.247045	-0.123216	0.0321198	13146700	18615200	22341800	15204600	22201500	23427900	26514200	13831500	36169000	17203900	9955340	32316600	23511500	9212530	20215800	24177500	9036430	12324000	27819700	26228600	14539500
P9WNB1	eccCb1	ESX-1 secretion system protein EccCb1	-0.125607	0.0947869	-0.120103	0.00341118	-0.191028	0.0194509	9289090	8744760	8328270	10002800	4398770	7796770	5561160	9145190	6280910	7657080	11055900	7610610	6822340	12021400	3301860	8297100	7028950	10326100	7113560	7477260	5501190
O06406	Rv0540	Uncharacterized protein	-0.125915	0.15995	0.0530751	0.0109313	0.238552	0.0632523	913400	1924510	957015	1406410	3162360	1620060	1827180	1495870	2871180	1436980	1242600	1473450	3261830	1026750	2293520	1975270	1386270	1334780	2082380	2120630	1740340
P9WHK7	pyrG	CTP synthase	-0.126397	0.0139551	-0.251498	0.0301272	-1.65598	1.57877	12050400	11451800	10376400	11595800	7446590	9217650	7917470	11620000	9305040	9706940	12391100	7637940	8604580	16989500	3141610	10317000	7115840	7107670	2729680	2426660	3855660
P9WQD5	tesA	Thioesterase TesA	-0.127624	0.224235	-0.912891	2.43494	-0.522775	0.353319	26153100	23740300	24584900	27161100	14533700	24336600	20599900	23778800	17397400	21381300	23171100	13535600	24004200	18729200	3581290	14576300	11275000	25554300	17016700	16861400	16598900
P9WQI3	sugC	Trehalose import ATP-binding protein SugC	-0.128458	0.10882	0.140038	0.0790334	0.179076	0.147485	12790200	11312200	13288000	11651300	8696950	11162200	11174900	12584200	8490340	10937000	12315200	9760000	8814130	15491000	4472980	11495100	13435500	14527500	11565000	10997800	14049400
I6YGX9	moxR2	Probable methanol dehydrogenase transcriptional regulatory protein MoxR2	-0.128493	0.306172	-0.201793	0.461039	-0.69382	0.786291	37626100	33734000	37200300	38176400	16497100	36188400	30752300	33975200	33636200	32573100	31402100	31808100	62451700	32874200	14592000	30663000	32266400	26797500	22601000	20929500	22143400
P9WJL1	murF	UDP-N-acetylmuramoyl-tripeptide--D-alanyl-D-alanine ligase	-0.12927	0.013051	-0.62251	1.18493	-0.5377	0.6255	10453200	9253450	9399590	9812860	5555420	7677480	9076420	10526500	6394250	10704700	10711600	6072730	5730270	9420580	1191730	4553660	7467310	8118870	4714540	5057920	7690900
P9WK07	metE	5-methyltetrahydropteroyltriglutamate--homocysteine methyltransferase	-0.129299	0.0168943	-0.855239	2.2529	-0.698732	1.39024	637573000	535864000	543520000	561905000	260499000	473674000	442491000	547084000	524014000	463974000	515881000	458879000	426359000	387278000	201158000	373740000	218683000	443066000	313866000	346440000	230732000
O07406	Rv0161	Possible oxidoreductase	-0.130054	0.336258	-0.195584	0.538472	-0.135471	0.091066	7978580	7405000	8541800	6241500	4801860	5416890	6136750	7081970	5206240	6200690	6664310	3810680	4381290	7695360	2574730	6136960	4763440	7940240	5252070	5584930	5779250
P9WN37	glnA2	Glutamine synthetase	-0.130349	0.0712724	-0.486186	0.71772	-0.44692	0.297363	31327500	29828900	32183400	33898800	18528300	29376700	23398800	29474200	25029800	36335800	32031800	18418500	19377100	33263500	7879490	24676400	17913900	29166400	22344200	21421200	18872900
P9WIP9	hbhA	Heparin-binding hemagglutinin	-0.130879	0.0639108	0.0562926	0.0329889	0.593201	0.54593	236939000	426687000	466672000	318720000	371898000	542353000	641424000	255372000	751563000	301466000	156682000	477899000	564521000	163655000	638330000	651972000	249000000	275653000	982283000	761947000	525445000
I6WYU2	Rv0597c	Uncharacterized protein	-0.131206	0.289912	-0.362419	1.24532	0.0863009	0.111282	2765610	2378190	2946020	2524970	3913050	2849200	2439700	2340550	2935470	2315340	2446860	3193660	2603520	2338350	1724350	2529020	1964160	2481010	3391180	3538620	2142980
P9WNU5	polA	DNA polymerase I	-0.131257	0.170556	0.0187701	0.458726	0.0201225	0.0632523	17261700	16295800	17533900	15732500	15423600	18513100	17615100	16060800	15607200	18483900	15222500	15913900	14170700	18403400	7078270	17706100	17269400	19418400	16778900	16114600	18229400
O05456	Rv3888c	Probable conserved membrane protein	-0.131611	0.243821	-0.597316	1.45643	-0.172576	0.193589	16308200	15934500	15917800	18465200	11024000	17337300	11514900	12161200	12808400	14426700	14663700	16553200	14833900	14137500	5903310	13578600	7486250	15638200	14296000	13980000	8378580
P9WNM1	tsf	Elongation factor Ts	-0.131915	0.348327	-0.705275	3.39432	-0.023391	0.0356698	66222100	64779100	72822700	68374400	44877400	67019300	67886800	65161600	57441800	68965000	64679700	38099100	57646500	47140800	26203100	47715100	35068500	64727400	67155500	68337900	59067200
O07177	mak	Maltokinase	-0.132074	0.0600064	-0.424547	0.874753	-0.65558	0.507903	16179400	13150100	14122500	14676100	7617410	13390400	13725800	15985800	10096500	15548600	14953600	7998910	9051090	13496200	4224120	10932700	9520730	14413400	8258980	8643620	8783210
P9WGJ9	embR	Transcriptional regulatory protein EmbR	-0.132462	0.252347	-0.137212	0.51966	-0.132629	0.0802953	10851300	11184600	12069400	9714710	7789840	9776190	11054100	10056400	10335900	9742300	10211700	8716780	8146040	10644000	5174930	11287200	9089630	10782000	9222100	9589210	10207200
P9WNN3	echA17	Probable enoyl-CoA hydratase echA17	-0.133734	0.430331	-0.564417	0.812794	-0.787277	1.18264	6560680	9028880	13308900	9023600	17570900	14223300	16953000	4853540	14628000	9633310	5930190	14658600	15415300	5765470	8767600	10751800	9232120	3749990	9173550	7694420	7728910
P9WNU9;D9HNS7	dop	Pup deamidase/depupylase	-0.134721	0.0632835	-0.34566	0.438294	-0.318003	0.0545258	9938310	9956840	9223420	9578310	5091340	8013890	8043110	9701920	7817500	8984730	9729310	5969150	5841520	10056400	3571410	8011420	6505280	10619400	7449110	7348570	6316120
O53751	Rv0466	Conserved protein	-0.13622	0.133502	-0.216197	0.146326	0.191801	0.218446	29587700	38048300	40658600	29925000	46558200	46246400	48148100	28596100	49900300	30354200	25695000	43636300	47031000	23840300	46160100	48717700	13202900	33794600	59085000	61089900	21998100
P9WHW5	pstP	Serine/threonine protein phosphatase PstP	-0.136631	0.186933	-0.136059	0.872054	-0.164197	0.121486	10065000	9556590	8974650	10442700	7172580	9062870	8322830	9663600	6114480	10589000	10301000	5513470	6824310	8638200	2866540	8791800	7856250	9788950	7159790	8557620	7618250
P9WPE7	groEL2	Chaperonin GroEL 2	-0.137554	0.146365	-0.375347	0.774171	0.0693029	0.0708432	1872140000	1983150000	1893290000	2135930000	1378900000	2387850000	2092950000	2178650000	1651370000	2581370000	1954230000	894587000	1264940000	1971310000	618132000	1942570000	1115130000	2401020000	2176100000	1985380000	1450180000
P95189	hisN	Histidinol-phosphatase	-0.138562	0.388936	-0.87159	4.94592	0.0523727	0.243778	8730970	9491580	10149800	6875910	7932300	9952760	7293530	8177290	8050970	7673450	7139630	8882260	7811880	5304880	3352030	5376220	4238840	8642790	9464700	10662100	7267600
P9WG71	thiL	Thiamine-monophosphate kinase	-0.139582	0.134675	-0.153674	0.227407	-1.49972	5.0143	4147360	3306360	3486540	2827690	2952720	2940250	3208380	3594250	2726900	3098120	3674590	2399760	2698000	3931490	2316470	2900840	2867560	1713060	451913	1016070	1253030
P9WGD1	cpsY	Exopolysaccharide phosphotransferase CpsY	-0.139718	0.0617697	0.715911	0.638674	0.819514	1.90912	2366100	2394990	2087110	2461300	2037830	2270180	1720820	2439090	1638670	1561940	4207640	2563790	1682180	4837540	1027050	3733290	3724340	6646340	3621140	3552920	4391740
P9WIQ1	glf	UDP-galactopyranose mutase	-0.140183	0.0231282	-0.607506	1.91582	-0.2692	0.0876114	9821240	10186900	11606500	10096200	4558480	11704400	8284370	9336430	10241800	8986240	8299720	10929200	8268030	8105290	2030250	6790600	6462280	10474600	8701700	8007280	8053540
P9WIK7	papA2	Trehalose-2-sulfate acyltransferase PapA2	-0.140322	0.156848	-0.0669435	0.130625	-0.886661	1.13317	2852890	2632680	2910110	2890560	1750090	2552380	1825270	3063040	1166070	2351290	2722520	1143360	2426060	2513310	NA	2612450	1147010	2066020	836936	2010910	749782
O53489	lppI	Probable lipoprotein LppI	-0.140342	0.141354	-0.644223	0.896437	-0.688728	0.410233	2890240	2360570	2274620	2670030	1842240	1734080	2304680	2559900	1435700	2420650	2431890	1625200	1761440	1474620	NA	1872470	877277	3050410	1760060	1099590	682733
P9WGH5	sigL	ECF RNA polymerase sigma factor SigL	-0.140702	0.730413	-1.14084	0.952051	-0.877363	0.549918	809625	631264	928204	697381	1097290	997663	912708	759254	NA	827897	751966	2091840	2143010	271591	556228	568130	267803	395107	598579	735125	165165
P9WHK9	pyrE	Orotate phosphoribosyltransferase	-0.141164	0.013051	-0.679716	1.21635	-0.174677	0.281638	11027400	9449340	13875200	8401530	17397500	16725800	20051700	10752100	14411600	10607500	9445940	21596000	18591000	8578790	7911890	11012900	8745460	9326090	12227200	13029200	12358700
P9WPL3	cyp143	Putative cytochrome P450 143	-0.142072	0.692531	-0.605368	2.45522	0.214553	0.445629	3356120	3594190	2998590	2581930	4216000	3386000	4110250	3083760	3544280	3053140	2176850	2257220	3485800	3096820	1608840	1578360	2842420	3952700	4164550	3726450	3905150
P9WIP3	menA	1,4-dihydroxy-2-naphthoate octaprenyltransferase	-0.142381	0.227938	-0.491041	0.577134	-0.255631	0.371438	1883630	1632830	1504520	2467480	NA	1390320	1263890	1403010	2355500	1522910	1439500	1136210	1324720	1569880	NA	1116130	1100020	1971410	1319700	812606	1308210
O53546	yrbE4A	Conserved integral membrane protein YrbE4A. Possible ABC transporter	-0.142402	0.106956	-0.543179	0.221152	-0.46421	0.154297	3130080	3248980	2218440	3783380	NA	3088200	678204	2816910	2453970	3936680	2315610	3034120	NA	2411700	NA	NA	1855640	3193910	1393380	2568350	1939080
P9WNA1	ftsQ	Cell division protein FtsQ	-0.142873	0.282273	-0.479274	3.23207	0.0855362	0.0861965	6564870	5972460	5956470	6953980	4692500	6631150	5525080	5445530	6265730	6206880	5036190	5373150	5366550	4682720	1372450	3885830	4691090	6223430	6802820	6451110	5136520
P9WL95	Rv2568c	Uncharacterized protein Rv2568c	-0.143608	1.10224	-0.681989	1.50332	-0.64804	0.901802	1900730	1895140	1898090	2550760	1849910	1774020	2509590	1777350	1190080	1833920	1718250	NA	666538	1701960	NA	901753	1183090	1981170	NA	1211260	831987
P9WF91	vapC21	Ribonuclease VapC21	-0.143695	0.033766	-0.897933	0.322361	-0.572894	0.337742	740109	1917510	1338020	1017930	1952720	1427290	2593230	774316	2829210	1291980	568716	2753550	NA	251815	2293590	1280110	196620	875490	1043550	1482270	168543
I6X5C5	Rv2781c	Possible alanine rich oxidoreductase	-0.143919	0.243203	0.204972	0.374317	0.315511	1.09055	3561830	2811240	3051410	3146540	2562690	3252330	2985870	3350320	700415	2555360	2968040	1579310	3694390	4744750	NA	3517250	2330560	6528840	3608020	3817890	3776780
O50459	lpqZ	Probable lipoprotein LpqZ	-0.14415	0.125579	-0.307031	0.929445	-0.144934	0.218145	1624870	1360750	1796130	1495360	2205140	1409800	1307390	1452440	1313380	1267450	1392960	1203970	2514780	1508620	991174	1137790	1279620	1747190	1334570	1370300	1029700
P9WPV1	atpC	ATP synthase epsilon chain	-0.144492	0.657379	-0.444669	2.62562	0.0511815	0.0114086	56771600	50325600	56359400	43012000	88025000	64008000	60703900	55791000	46539600	57495000	46931300	56335400	41452900	43898500	22741700	39527700	47925600	55669400	63271100	61974200	53972400
P9WNY1	Rv0458	Probable aldehyde dehydrogenase	-0.146472	0.198889	-0.0170758	0.20656	0.0726112	0.0979195	22719900	19474200	20957600	16005800	5888330	16186100	16049700	16486400	10622900	18125000	18778600	7914440	12760500	22074800	4199170	15227400	16763900	27749500	13285500	14187600	19855600
O06278	Rv3604c	Probable conserved transmembrane protein rich in alanine and arginine and proline	-0.148703	0.15566	-0.349196	0.913787	-0.357816	0.396563	11546000	10271400	10292600	10908500	7455210	8736840	10595600	10587100	7584790	10870700	10196000	7434600	8373110	11179100	4035200	7866670	8293150	10143100	7633030	7585650	8430530
P9WPK5	carA	Carbamoyl-phosphate synthase small chain	-0.149189	0.336343	-0.514108	1.05447	-0.344875	0.0588668	6655490	5894680	5382900	5847410	3213420	5543270	5033380	4939920	5057450	5716320	5146460	2523120	3127860	5465160	896851	3109700	4653380	7696270	3888250	3627420	4841030
O06145	Rv1628c	Conserved protein	-0.149212	0.0857422	-0.252457	0.64225	0.373495	0.510594	2117710	2260280	1907440	1878120	1065650	1716470	2672020	2587970	1720020	1608970	1456040	NA	2206510	1660120	1286790	1542340	2062350	1891440	2501920	2440210	2564310
P9WKJ5	ilvD	Dihydroxy-acid dehydratase	-0.150867	0.00149105	-0.491061	0.784664	-0.697021	0.661525	46637800	41119100	41983500	43507300	24704100	33465700	29366800	45449800	30812400	43260300	48240900	22874300	24911000	42443900	7687580	23882400	34630200	35532200	18588300	21334700	29393500
P9WIT9	argF	Ornithine carbamoyltransferase	-0.150893	0.0391185	-0.619366	0.235786	0.0617616	0.113566	5462610	3554140	3353120	3105320	2907250	2277270	2965610	5026830	2249090	2415550	3561150	2796940	NA	3863710	NA	2021430	1797590	6149880	2680900	3801390	1646350
O05295	fadD36	Probable fatty-acid-CoA ligase FadD36 (Fatty-acid-CoA synthetase) (Fatty-acid-CoA synthase)	-0.150953	0.267883	0.145726	0.183474	0.0840496	0.0557474	12964800	12055500	12008000	13750000	10472900	11648300	14355000	10914600	11609500	13099300	10801100	10353700	9804950	15557400	4955020	11774200	14899500	17287300	9739100	11695300	13862100
P9WML5	pat	Putative phenylalanine aminotransferase	-0.152022	0.247987	-0.304679	1.09564	-0.220825	0.269355	10950100	11287200	9264470	9495420	6917410	8540750	9937520	6837460	10934100	8941340	7012040	11035500	8150190	9486410	2699370	5889000	10826600	8893330	7088030	7402230	10245900
P9WH73	nrdF1	Ribonucleoside-diphosphate reductase subunit beta nrdF1	-0.152542	0.117064	-0.233792	0.0602429	-0.948201	0.710572	10857700	10460500	10425300	9110310	2002700	7873740	7065260	12101200	6013740	11259100	9765320	4753290	6627110	10981800	4285600	8794040	6700720	7428550	3445710	5054490	4388860
O53533	mscR	S-nitrosomycothiol reductase MscR	-0.153385	0.0177984	-0.0491391	0.00751134	-0.722202	0.300015	10149800	8587350	9171750	9589820	4131090	7781030	9359960	11287400	6749740	9743600	10401300	4432890	5875090	13032600	2791260	8880090	8849140	9559280	4698010	5105950	6013360
O06198	Rv2616	Conserved protein	-0.153389	0.55783	0.425973	0.844089	0.23922	0.476614	2304740	2552300	1948380	2597180	1651260	2198700	1942720	1298860	784554	2508870	1976930	2222230	NA	3148970	NA	NA	2758840	3647540	2838410	1789060	2352080
O06298	Rv0347	Probable conserved membrane protein	-0.153573	0.791054	-0.395776	2.12052	0.17237	0.531973	8951300	8576700	8685250	9213320	7638410	9333550	10403300	9045310	7282630	8925580	8812190	5243120	4399640	7468150	3440930	6826680	6780740	11266900	10315500	9859090	9526940
P71795	Rv1516c	Probable sugar transferase	-0.153793	0.0947869	-0.317472	0.852257	0.228644	1.08862	6441500	6995170	5715830	6400630	5961840	6251250	4468490	5197920	7843510	4935280	4600610	7097590	6040380	5597490	4561780	5471160	4145220	8005480	7586720	7062870	5724120
P9WND7	mftD	Pre-mycofactocin synthase	-0.1549	0.13469	-0.664105	1.07084	0.123204	0.00561821	12135700	15323400	17305800	14284400	22203400	22344000	11973600	10609000	22580400	12895300	9921070	24138700	14631500	6831480	12509100	13406500	3923520	12387600	20991400	21401100	6892460
O53749	Rv0464c	Conserved protein	-0.156009	0.169847	-0.433219	0.879032	0.0423439	0.154467	21995600	30939200	22047600	25006100	14427000	20272900	13626600	14732000	19289800	18056900	22218000	20192500	26069800	22056900	5988120	16252800	16327400	29552500	23691800	21609700	15612900
P9WHH7	lpdA	NAD(P)H dehydrogenase (quinone)	-0.15634	0.10082	0.284802	0.00751134	-1.099	0.944421	8316730	7013240	8415050	9942230	3918490	7061190	5177060	7646310	5027560	7644430	8784930	4665970	4156990	11750300	1357160	6891390	10313100	5432180	2368500	2660180	3932700
P9WHI9	recF	DNA replication and repair protein RecF	-0.156617	0.0564545	-0.304624	0.721897	0.0202908	0.200428	2231860	2094030	2307180	2171010	1121330	2355970	1826790	2033460	2652780	1861880	1569890	2818610	1484690	1616700	1253170	1898830	2019330	2132800	2270720	2273000	2109080
P9WIT1	Rv2280	Uncharacterized FAD-linked oxidoreductase Rv2280	-0.157754	0.0484334	-0.187266	0.541612	-0.340251	0.0496008	47516800	43045300	47863000	49465700	36520800	38975800	47617800	51674800	38442100	46747900	55990900	22444500	35145600	46461700	15393600	42401000	41064000	56750500	36213400	38854000	34239600
P9WLW9	Rv1498c	Uncharacterized protein Rv1498c	-0.158199	0.0115169	-0.295538	0.0702034	0.216149	0.524013	14883500	12087900	13403600	12019500	14999000	16585400	14948300	12226500	19400400	12584800	9719110	14090700	17945400	9284410	14968800	19137800	7539830	14306200	20272000	21706600	11159400
O65934	Rv1747	ABC transporter ATP-binding/permease protein Rv1747	-0.15821	0.29005	0.125226	0.0527137	-0.00101439	0.0258614	12060400	11322600	10065800	12742300	8851340	9961620	9270960	9484040	8556620	10401500	11953800	8121680	6933070	14716800	4956760	10410100	11547000	14685100	8491550	9590850	10526600
P9WH37	rpsC	30S ribosomal protein S3	-0.158804	0.0918775	-1.07893	2.63064	-0.0692968	0.0708432	104690000	100519000	122952000	97033300	103369000	117209000	67838000	88985800	96203400	69438100	79724900	152770000	108196000	61200000	36665900	72851400	36529900	90878500	110593000	106164000	64136500
P9WHM5	purN	Phosphoribosylglycinamide formyltransferase	-0.159999	0.314851	-0.144927	0.791775	0.0250347	0.00949773	15728300	13588800	13838900	11767400	12714100	11764200	11814300	11144000	11614900	9662940	9369000	14437100	14895500	14673900	5674020	9788110	13209800	13408100	12314700	12465200	15542200
P9WNP5	menB	1,4-dihydroxy-2-naphthoyl-CoA synthase	-0.160337	0.0280639	-0.271504	0.173893	-0.309078	0.0644488	17509800	17309200	18358500	18442200	11821600	15443800	13630200	18324200	11759200	17641200	18771700	12042400	13335900	22596000	5309640	16728400	11951400	19533200	13128000	14814500	10436100
I6XA42	Rv0919	GCN5-related N-acetyltransferase	-0.160412	0.358927	-0.509381	0.49848	0.0369347	0.0579797	386386	338878	672049	970584	1083120	458050	541731	180194	557420	489171	160072	1202120	480278	258236	NA	NA	502922	NA	563043	NA	548515
P95024	Rv2529	ERCC4 domain-containing protein	-0.161449	0.083677	0.0651836	0.225602	0.377359	1.27575	4981720	5111530	6120740	6070890	3962350	5600840	4123850	4552860	4418240	3646310	4587850	6542280	6429930	5429630	3041850	5460260	5265920	6523690	6198530	6908980	6755670
I6YDM0	Rv2516c	Uncharacterized protein	-0.162575	0.646878	-0.46467	1.57887	-0.314014	0.544206	2997490	3608290	3123810	2613370	5714280	5084630	3926420	2869800	3540810	2906690	1941950	4559920	3551610	2669840	2043740	2928030	2559560	2594980	3890200	3210040	2343590
P9WMJ7	htpG	Chaperone protein HtpG	-0.164172	0.0294134	-0.654771	1.02786	-0.645488	0.163018	56641700	55435000	56420600	61750500	21835600	47194200	40023700	61429000	37515900	64076700	65043600	24723500	32962500	43582600	7716140	37648400	32773600	58330500	35745300	35131300	33960200
P9WIE3	ahpE	Alkyl hydroperoxide reductase E	-0.164401	0.422786	-0.503375	0.579795	0.187241	0.294125	25778200	32586400	33846900	27786200	36368000	40627800	38247500	22676500	36614300	27703600	19826400	32699500	36639100	22306400	25448500	37185000	17808500	26075000	46684100	48232800	30391000
I6YEE1	pptH	[Acyl-carrier-protein] phosphodiesterase PptH	-0.164435	0.00805833	0.224643	1.04822	-0.0783807	0.0425574	4137250	3594350	4530810	4342260	1836970	4165570	4383480	3726380	3248300	3707310	4303540	3265000	5137090	4890500	3587380	6303260	4844340	4623870	3681430	3536410	4209160
P63907	add	Adenosine deaminase	-0.165254	0.247987	-0.202044	0.0256798	0.124887	0.100098	11412500	11496800	14256100	9873990	13978300	14498700	16846400	8839520	14516700	10414200	8321960	14705800	16904000	9279150	14946800	16449100	9356370	9818230	16131100	16514000	14353400
I6YB54	Rv3096	Uncharacterized protein	-0.165451	0.119152	-0.659281	0.374317	-0.366675	0.0545258	1805340	4857440	4006040	2699860	7593200	4120800	3089370	1659800	5797950	2146290	2958900	6576090	4185070	1709550	4561920	3363650	941782	2175290	5868660	4038620	1640030
P9WLL9	Rv2067c	Uncharacterized protein Rv2067c	-0.165546	0.832051	-0.808523	5.2471	-0.394397	1.57428	4650670	3987810	3801050	4162000	4091120	3608840	3814220	3573080	3922190	2923090	3432490	3537910	3893790	2402960	1788270	2251850	2301960	4077560	3368910	2699000	2190910
P9WGH9	sigH	ECF RNA polymerase sigma factor SigH	-0.166694	0.399654	-0.00904654	0.111573	-0.0303228	0.0578433	8248540	9095020	9686580	9448140	9203650	11369200	11764100	8717560	7596790	9922740	8116790	3599760	10354200	9540290	3311790	14567200	9237870	9525430	10207700	8977830	7586550
I6Y4E8	echA5	Probable enoyl-CoA hydratase EchA5 (Enoyl hydrase) (Unsaturated acyl-CoA hydratase) (Crotonase)	-0.167091	1.36206	-0.74416	5.28792	-0.171766	0.918659	21749200	24355100	26996600	21652500	26404400	22055200	22801500	16654500	25341800	22749500	15974700	23603000	17866200	15103400	8433640	13178200	14047500	21058500	20043700	20440600	18307400
P9WGV1	metK	S-adenosylmethionine synthase	-0.16759	0.0280639	-1.00469	2.36362	-0.445143	0.241756	143239000	129355000	132608000	132799000	68780700	121297000	109118000	152724000	103693000	146113000	126644000	76273100	92714600	90280300	25469500	70118700	58816500	134425000	93831600	96193900	78062300
P9WGK5	senX3	Sensor-like histidine kinase SenX3	-0.167597	0.328607	-0.550494	0.899424	-0.0539308	0.0258614	1948730	2250360	2640770	2253480	2354500	1976340	1327840	887019	1305840	1722920	2284180	2843090	2800590	1611360	1502080	1570950	1147670	2082320	2333520	2253260	1059610
P9WL23	Rv2915c	Uncharacterized protein Rv2915c	-0.168598	0.0931071	0.359254	0.504953	0.0845005	0.0530915	2074680	1730890	1767970	2093720	1342720	1711650	1786700	1726510	2112760	1395100	1419440	NA	NA	2875500	1277810	2303130	2232640	2535640	1233890	1846730	1902500
P9WGF3	smc	Chromosome partition protein Smc	-0.169239	0.0712724	0.136493	0.00191123	-0.361045	0.163018	8728830	7058380	7778140	7707350	4610950	6837510	7550240	8044280	5602130	7826900	8184390	5021020	5077490	10381300	2296460	8396590	8202310	7970880	5183200	5517980	6239260
P9WPM7	cyp136	Putative cytochrome P450 136	-0.169355	0.371421	-0.238612	0.229563	-0.84746	2.0105	5493460	6829940	7448280	5770210	5489470	7326520	6350080	4360570	7960760	4401560	3615480	7475700	6891930	4281150	6483000	7653830	3635810	2949830	4108440	4222800	2539650
P9WGL5	pdtaS	Probable sensor histidine kinase PdtaS	-0.17047	0.337395	-0.383204	1.59256	-0.521422	1.07659	6968950	7080460	7081010	6888440	5401570	6523470	5942490	5899380	4748770	6365650	6342110	7520820	4857240	6322580	2200750	5511530	5051660	5651470	4785070	4813070	4627200
P9WFU9	lysS1	Lysine--tRNA ligase 1	-0.170875	0.0209979	-0.704546	0.911206	-0.696876	0.39265	13566400	12479500	12199400	14105300	6207660	10905400	9409680	13476900	9013150	12660400	13623400	7814390	7568040	12733000	3015110	7529620	7442350	12503000	7001350	7600120	7451660
P95029	fas	Probable fatty acid synthase Fas (Fatty acid synthetase)	-0.17116	0.0735556	-0.502968	0.88843	-0.652822	0.669653	132460000	103046000	98375800	116947000	53307300	95538600	75674600	104067000	74294900	98514400	117436000	76226300	71518200	108055000	28741900	70307400	68531100	94278900	56670700	64269100	60871800
P9WL89	Rv2571c	Uncharacterized protein Rv2571c	-0.171894	0.124021	-0.147418	0.213067	0.00194016	0.0234625	2876420	1380070	1932050	1944170	1445450	2015310	1060690	1726070	950490	1704000	1813080	2247880	1005820	2565430	355895	923329	2584370	2956150	1170130	1096820	2699170
P9WHV7	ppnK	NAD kinase	-0.172486	0.292208	-0.225036	1.24265	-0.214617	0.270664	9670510	8882080	11189800	9316620	6990570	8569460	7786290	9380230	6248140	8360550	9377380	7052340	7401810	8117970	4219180	7831680	7366870	9872540	6461540	7843170	7465540
P9WIT3	Rv1771	L-gulono-1,4-lactone dehydrogenase	-0.17287	0.0276603	-0.43458	1.00607	-0.193044	0.0200138	46370000	45320900	42619100	50053000	24485200	44109000	30470500	43703800	35019400	40048300	49870000	37101600	38207800	40107800	14920600	35766400	29506900	47340900	34903000	42266400	29820400
P9WIQ3	fprA	NADPH-ferredoxin reductase FprA	-0.172933	0.45378	-0.418956	1.35728	-0.11192	0.000905296	7694100	7709470	6377530	7113700	4611540	6234880	5894370	6045480	5268740	6908840	6586490	3279740	3669390	6419850	934291	4291430	5248920	8512130	5626700	5540820	6176270
P9WMS3	dhmA1	Haloalkane dehalogenase 1	-0.175076	0.754711	-0.57356	2.38375	0.224973	0.00694542	80970500	88052400	91946100	78532000	148166000	119533000	111703000	67095300	89254100	73623100	52377100	116835000	114432000	59639500	39561500	69987800	63928100	81105300	117908000	101700000	113225000
P9WMR7	Rv1341	dITP/XTP pyrophosphatase	-0.175407	0.779517	-0.548292	2.64359	0.0438047	0.0632523	6893180	6839060	7814680	6629400	9520660	7048450	7126080	6994400	5016660	8366790	6834080	3338650	5648970	4602480	2373260	5037390	6784130	7479940	7051550	6668670	7524090
P9WHS9	dapE	Putative succinyl-diaminopimelate desuccinylase DapE	-0.175677	0.233565	0.145438	0.0118341	-0.119481	0.0103529	7704100	6506230	8313510	7118050	3382130	6096930	6005990	6138820	5381790	6564410	6404040	4561820	4435090	9083400	2655830	6740500	7652140	8655850	4800360	5629460	6348750
P96274	Rv0428c	GCN5-related N-acetyltransferase	-0.175703	0.190652	-0.0925013	0.189897	0.517372	0.40093	5405760	7351150	7760600	6469820	9566140	10215700	10709900	5104510	11800800	6193420	3418560	12207300	7548060	5484990	7417450	9056410	7139810	7090490	11800400	10871300	11344900
P9WKW9	Rv3786c	Uncharacterized protein Rv3786c	-0.175873	0.277005	-0.400079	0.480774	-0.274059	0.348536	2310630	1991040	2876200	2994010	3750360	2685240	987647	2375020	1398100	2379100	2504280	2416350	2022290	1766280	NA	2034920	2354970	2674220	1251530	1767110	2908030
O05848	Rv3218	Conserved protein	-0.176034	0.207141	-0.285763	1.05464	0.104749	0.597626	3095710	3380680	3239180	2918210	2121490	2474950	3298270	2679920	2746810	3223700	3016660	2733420	2356300	2892400	2186470	1941640	2939870	3402300	3255380	3002750	4036030
O69729	tcrY	Probable sensor histidine kinase TcrY	-0.179349	0.260654	0.524838	1.69451	-0.0172759	0.0530726	1678280	1368870	1644500	1626670	2572190	1702750	1378740	1327230	1337560	966236	1566960	1942030	2046960	2912540	1819580	3123900	1772220	1762240	1870890	1487610	1144210
I6X9E2	lpqO	Probable conserved lipoprotein LpqO	-0.179365	0.184011	-0.370339	0.205543	-0.243359	0.091066	2480090	2524980	2989100	3012530	3645970	2376950	3158960	2899710	2379590	3794280	3052460	1195500	2278290	3256090	NA	2312370	1778720	3574010	2413650	2636590	1571340
O69693	Rv3726	Possible dehydrogenase	-0.179487	0.286041	-0.7458	2.78146	-0.64445	1.4585	7927980	6656920	8829340	6571970	3737070	5547190	6272140	6546990	5320550	7087630	5957180	5649140	3963020	4290010	1406120	3548210	4688790	5643320	3432920	3655580	4753080
O69652	Rv3684	Probable lyase	-0.179589	0.0129867	-0.295198	0.363231	-0.43704	0.207051	25137000	19220300	21194800	21582500	10113300	17013000	16206400	26618700	11938400	22312700	22002900	9447370	9919750	25279600	3609630	9946770	21380800	22017600	11092500	9893540	17301600
O53185	mmuM	Probable homocysteine S-methyltransferase MmuM (S-methylmethionine:homocysteine methyltransferase) (Cysteine methyltransferase)	-0.180794	0.210192	-0.566759	0.457306	-0.561719	0.476711	800588	1061080	1599200	1171340	1589090	2140240	1346460	539579	1897750	1309060	833273	2204360	1066680	1210940	607136	1552910	542811	780638	1297810	1043800	502876
P9WPX5	ansA	L-asparaginase	-0.181896	0.186311	-0.13424	0.0567524	-0.393983	0.335123	6133730	7399980	6347440	6331610	4289710	6316960	5669750	6285500	5697870	7678930	5439480	3568030	4601750	5665380	7143730	5846010	3999110	6922670	4726040	4888700	3549860
P9WQC9	acyP	Acylphosphatase	-0.182299	0.0705995	0.393645	0.415415	0.0985061	0.0566971	12807800	19894500	25757900	15442000	44091000	24895900	27975600	11853100	45934900	16653700	12459900	27227700	63954000	14663100	53766300	50748800	11148900	15131100	36486700	36913000	16823600
P96368	trcS	Sensor histidine kinase TrcS	-0.182408	0.0242875	-0.00359472	0.0874418	-0.872442	1.31726	1855830	1389670	994536	1490080	294754	1137200	848339	1447000	769646	797045	1393590	902241	1102030	1134370	NA	941451	1191150	875816	384528	534218	708108
P71990	Rv1732c	Conserved protein	-0.182469	0.459003	0.0386858	0.0346676	0.306699	0.0709288	10564900	13129100	13144800	14486000	10325000	9115860	9528980	8988770	9381000	12724400	9238450	3496760	11214100	9961260	11742800	15428800	3712960	12278700	15067600	13856200	3572290
O07191	Rv2689c	Conserved alanine and valine and glycine rich protein	-0.183237	0.150692	-0.354646	0.509465	-0.173144	0.0365352	2412790	2185780	2252630	2211130	1819380	1913400	1820020	2341100	1851940	1971920	1892240	1957900	1341800	2281070	1086360	2113900	1304930	2602650	1749960	2127210	1275360
P96890	accA3	Biotin-dependent acyl-coenzyme A carboxylase alpha3 subunit	-0.183617	0.0615868	-0.271413	0.488123	-0.67045	0.394542	173959000	170456000	162911000	185124000	87845600	134239000	135272000	178398000	116894000	169990000	176018000	85873800	99102900	180523000	25329400	127183000	142763000	158661000	93705400	90437400	111012000
P9WHN1	purC	Phosphoribosylaminoimidazole-succinocarboxamide synthase	-0.183648	0.142748	-0.534402	1.06979	0.230131	0.671265	14871900	14846100	17910700	13980700	18450500	19531600	23395900	15146800	21470400	13852800	12391700	22080700	16393000	11729900	11611700	17581900	13002800	17873800	22794000	23155600	19222400
I6X7F2	Rv3483c	Possible exported protein	-0.184783	0.0646849	-0.320069	0.507925	-0.128715	0.0393406	5327750	3123970	4369100	4220220	3151420	4280120	3471240	5022040	2090750	5961120	4742830	1277770	2682910	3661150	NA	2300530	3380530	3812250	4147750	3907760	3166620
P9WN19	gltD	Glutamate synthase [NADPH] small chain	-0.18561	0.159721	-0.367711	1.19873	-0.710988	1.43343	12119400	10695800	13002200	12493100	6970130	10760600	10093300	11595500	8536100	10387000	13691700	7157550	7840100	10902100	3003750	8741450	7937720	8581970	6004980	6041120	7106220
P9WIX9	mutT3	Putative 8-oxo-dGTP diphosphatase 3	-0.186007	0.0449445	0.594342	0.600415	-0.331469	0.0779213	1930290	2361510	1873020	2424760	1729620	2802590	2532280	2723860	1756320	2673460	2395380	1208640	1501800	3512650	1015730	4103930	3618090	2916000	1297600	1920710	1832800
P75019	echA21	Possible enoyl-CoA hydratase EchA21 (Enoyl hydrase) (Unsaturated acyl-CoA hydratase) (Crotonase)	-0.186859	0.0918775	-0.340658	1.24532	-0.528021	0.854735	38610600	34386400	40697100	36890200	18743800	33147000	36804100	35167500	27359800	37394200	35675300	27773600	29498500	33050200	6368880	25341500	32785500	30028400	19601800	21798500	29249200
O50417	acrA1	Possible multi-functional enzyme with acyl-CoA-reductase activity AcrA1	-0.187209	1.40909	-0.368227	0.169276	-0.119548	0.00949773	907922	868081	800125	778037	841361	985885	432354	93551.8	738970	742341	NA	NA	NA	570491	733171	1019980	416545	935099	856499	692406	580729
O53444	Rv1096	Possible glycosyl hydrolase	-0.188553	0.032404	0.934865	1.25208	0.507734	0.0989949	12738800	18889200	20743400	17075900	10148400	22603300	31578100	10832300	27362400	17782400	10904600	15367600	33941600	12501500	51967100	49720100	22501300	12157100	27426400	26287500	27579000
P9WGM5	narL	Probable transcriptional regulatory protein NarL	-0.188872	0.0626932	0.735846	0.734424	0.30013	0.0394026	11246500	17822400	18994600	13735600	33803700	24038800	29554900	9560970	30950500	11837900	7160110	21489700	43879600	11447300	58301900	47109600	16156600	11069000	32581600	29512400	17262000
P9WK01	Rv3342	Uncharacterized methyltransferase Rv3342	-0.189467	0.472786	0.0210099	0.100485	0.236863	0.0996946	12598800	13564000	14017200	12530500	22490400	17213200	21049700	9285920	18689200	10328700	6354330	14255500	17417300	8942750	20645600	19502900	6060620	11297000	24634100	21739500	10431100
P9WFG9	Rv0813c	Peroxynitrite isomerase 2	-0.190175	0.639952	0.104951	0.056656	-1.19622	2.6847	5162340	6867180	7912270	5706420	11941700	9399890	13524100	6096690	9028000	8377210	5022560	7773510	5325690	7777470	7203270	11727400	9241160	1890920	4615920	3027660	3878430
L7N6B0	lpqI	Beta-hexosaminidase LpqI	-0.190201	0.412753	-0.0403363	0.2584	0.666055	3.7644	19620900	17619500	17891200	19964200	8961660	17210400	17237500	15647400	13059000	15670400	15239000	12120500	17029000	15580900	9686540	18686500	19876000	23730500	27630900	28385400	28283800
P9WFZ3	trkA	Trk system potassium uptake protein TrkA	-0.190946	0.707048	-0.221509	0.235786	0.277179	0.810228	10844100	14631500	12813300	10832400	12769600	14156800	15879500	11339400	12839100	11920400	8935490	7526960	11110300	12035100	9944010	15216000	9189540	13538900	20586500	17516000	10789900
L0T5V6	vapC51	Ribonuclease VapC51	-0.191151	0.0221594	-0.896257	0.72065	-0.612597	0.208832	3891020	4363580	7304490	4078010	7243240	7041500	7329510	3327990	7827600	4507790	2907720	10412600	8079050	3029790	4536710	5093740	1782680	2627170	6147170	6422850	3063370
O65936	Rv1751	Probable oxidoreductase	-0.191396	0.331362	-0.202324	0.149484	0.497358	1.20149	26140000	27828400	31495000	25503300	25357400	30597100	27207700	16361400	30579200	15742500	18275200	39767700	29379500	24761100	22534000	33644800	16169200	31924700	45341300	44889500	25889400
I6YEH6	echA16	Probable enoyl-CoA hydratase EchA16 (Enoyl hydrase) (Unsaturated acyl-CoA hydratase) (Crotonase)	-0.191741	1.05263	-0.592065	4.97991	-0.487064	3.02679	59394600	54615100	56844200	48175400	50435100	51923000	50737200	49960400	47048400	48928900	42821000	40214800	43873800	38545500	16158700	34560000	34330700	36935300	34141800	37156300	42968600
I6Y9H2	Rv2499c	Possible oxidase regulatory-related protein	-0.192351	0.138665	-0.332889	0.0347802	0.0120028	0.0646017	1274600	1648830	2068970	1608220	1885740	1826670	1442450	1079120	1633300	1252740	1206380	2388980	1927270	1392620	1214990	2453680	1225540	1118490	2206720	2705080	627630
P9WQD3	acpS	Holo-[acyl-carrier-protein] synthase	-0.192569	0.168103	0.187028	0.122581	0.871174	0.983253	342111	676474	1015780	719947	406500	1274250	1295770	531677	951827	353146	486396	728297	871568	366109	1612720	1273090	258944	742802	2457350	1822830	810954
P9WK19	map	Methionine aminopeptidase 2	-0.192866	0.0748888	0.142619	0.140246	-0.588397	1.08862	15480000	13299200	16273400	14745400	7940040	15244700	12750300	12355200	11442300	13445300	15196700	11697600	15928700	15118600	8760150	18109900	17436500	10540500	9073280	9062560	11572200
O69658	Rv3690	Probable conserved membrane protein	-0.193781	0.272286	-0.00718137	0.0226369	0.0108686	0.175973	1025100	1443420	977465	1097600	558369	1345920	1642920	990150	356648	959644	864465	NA	1753790	1241310	NA	1092150	986268	1242210	642985	NA	1105900
P9WFX3	trpE	Anthranilate synthase component 1	-0.193913	0.0276603	-0.045242	0.0937217	-0.289189	0.107411	13953000	12840100	12217900	12718800	6431420	11176600	11397700	14895800	8526040	12836500	15299100	8101410	8008230	16578800	3842870	10613600	13067800	13665700	8932030	7937090	11065300
P9WHP7	truB	tRNA pseudouridine synthase B	-0.194122	0.00987081	0.279576	0.629592	0.494257	1.53321	2279320	1941430	2679180	2603050	2116850	2444680	1884010	2010100	2773410	1885880	1852610	3354680	1974630	2847400	2686050	3245850	1632640	3101030	3680960	3320250	2005870
P9WMS7	guaA	GMP synthase [glutamine-hydrolyzing]	-0.194237	0.126478	0.0684884	0.00935705	0.273533	1.18127	31449200	24809300	30613800	28699600	14989100	24731400	30024300	26626000	25285900	28428100	24883000	19703800	23636800	32686300	14149600	30241800	29948000	36352400	33029700	32611100	37811700
O53777	Rv0580c	Conserved protein	-0.195051	0.0983303	0.091228	0.192213	-0.737507	0.269355	158052000	257120000	341536000	138635000	279105000	352160000	393275000	151623000	370569000	164173000	109348000	429983000	323447000	107942000	519358000	486706000	80607500	95665300	269210000	239135000	81586600
I6Y8K3	Rv0737	Possible transcriptional regulatory protein	-0.19507	0.156848	0.0974622	0.100493	-0.319151	0.290361	1472940	1655140	1401150	1174930	2333870	1535990	2120040	886849	1871400	518308	673178	1796620	3577720	1714340	1572340	2604350	1014420	803852	1451680	1537230	1010640
O53857	narS	Sensor histidine kinase NarS	-0.196392	0.322829	-0.308304	0.608019	-0.17016	0.260608	2498000	1950270	2157260	2404070	1936060	2181860	2323890	1978860	1645850	1931170	2547040	1877180	1707860	2649200	1223170	1256340	2267760	2551740	1396290	1633020	2245210
P9WMX5	pimF	Putative glycosyltransferases	-0.197316	0.0221594	0.522076	1.04755	-1.12771	0.649596	3854740	3254880	3206650	3226310	1286540	2749550	2245590	2452540	1264630	3140960	4453570	NA	NA	6286530	2568160	3476870	5732760	2617390	898925	1003240	1931750
P9WJJ7	nadC	Nicotinate-nucleotide pyrophosphorylase [carboxylating]	-0.197647	0.571023	-0.207542	1.66836	0.0679701	0.0117847	54162300	61930500	56363700	56124600	59958600	64138100	69697600	51920300	59780600	51420400	44902400	68833500	52644100	48820400	35496700	55029300	55173900	50988800	66987600	63371800	62330300
P9WPJ7	mtcA1	Beta-carbonic anhydrase 1	-0.197789	0.740361	-0.648523	2.39372	-0.464896	1.31726	25177300	21682600	27152400	22054700	14025400	21363200	18323800	19392200	19947400	21550100	18417300	10091600	16903600	17370700	7678330	15979100	11685000	16319900	15879400	15539700	14067000
L0TDE1	ligC	DNA ligase C	-0.201448	0.193315	-0.0608421	0.441734	-0.0371902	0.0183416	5132260	4599370	5472550	5150320	2577000	6202830	4925910	4951560	4442400	4484420	4846700	3855890	3842840	4838950	2055390	5001690	5132930	5954900	4039600	4561200	5442100
P9WJE1	espA	ESX-1 secretion-associated protein EspA	-0.201466	0.220567	0.122134	0.237829	-1.47152	0.723434	14559500	47275200	29897100	24095400	21194800	49061500	38344800	13782300	47585600	19034000	8655500	32967000	33425200	6969750	75362000	58106900	5385770	11263600	13402600	10298300	1749910
P9WNG3	fabH	3-oxoacyl-[acyl-carrier-protein] synthase 3	-0.202536	0.208594	-0.613228	1.50456	-0.386484	0.218145	10853000	10555700	10810700	10774800	7628310	11068000	11215000	10637300	9005560	12646200	9783900	5665150	8048140	10191500	2245070	7299100	6835510	12230200	7420120	7834600	8705590
P9WP31	ddl	D-alanine--D-alanine ligase	-0.203228	0.167332	-0.796344	1.13757	-0.304759	0.0708432	18790300	17999600	18423200	17192800	12723500	15633100	12737600	17492600	14118900	15748600	16927200	12431400	10191100	17743000	4837180	12159900	7639550	20666500	13863400	13974400	9937530
P95148	Rv1867	Conserved protein	-0.203239	1.05392	0.408854	0.253519	0.391432	0.440558	3637460	2900620	2874240	3711690	2825600	2694290	2836700	2807180	1492420	2496560	2919510	1142700	NA	3815930	NA	2694120	3986630	3991860	2793250	3548390	4566230
P9WIE5;A0A0N9DRW0;A0A0N7EHL4;A0A0N9DRV9;A0A0N9DQI3;A0A0N9DS37;A0A0N6WYQ3;A0A0N7EHL1;A0A0N9DRX8;A0A0N9DRV6;A0A0N9DRZ5;A0A0N6WYR3;A0A0N9DQW1;A0A0N9DRY5;A0A0N7EHL2;A0A0N9DS42;A0A0N9DS32;A0A0N9DS19;A0A0N9DS62;A0A0N7EHL5;A0A0N9DSA1;A0A0N9DS03;A0A0N9DRZ6;A0A0N9DS93;A0A0N7EHL7;A0A0N6WYR6;A0A0N7EHL6;A0A0N9DS52;A0A0N9DS48;A0A0N9DS04;A0A0N9DS11;A0A0N9DRZ0;A0A0N6WYR5;A0A0N9DS09;A0A0N9DS08;A0A0N6WYQ2;A0A0N9D…	katG	Catalase-peroxidase	-0.204064	0.0706112	-0.693109	1.80899	-0.634064	0.767518	121880000	121449000	126820000	132201000	40124700	116913000	103548000	121267000	92947200	143689000	117913000	52985800	80867000	76842100	13749500	73395100	84161400	87076800	69436600	68627300	88366500
O69725	proX	Possible osmoprotectant (Glycine betaine/carnitine/choline/L-proline) binding lipoprotein ProX	-0.206993	0.0569457	0.917594	1.71206	0.687129	0.426447	1857520	2997550	2469870	2658560	3513270	2291910	3594600	1504360	2999840	1560350	1606600	3063840	5963730	3053270	6140290	6237920	3903550	2587490	4348870	4249600	4311370
P9WGC9	Rv1301	Putative threonylcarbamoyl-AMP synthase	-0.207143	0.101371	-0.203821	0.11936	0.295176	0.337615	10047700	11206900	12995200	10342800	11520400	13687900	11001000	7788620	15106900	10445100	8073330	8970880	17496300	8223240	11237500	14584700	6722600	10809600	17060200	16692900	8171830
P9WFH7	Rv1896c	Putative S-adenosyl-L-methionine-dependent methyltransferase Rv1896c	-0.20762	0.294631	-0.108392	0.399177	-0.643042	0.800294	8130950	6332140	7417190	7548180	5434210	7183250	6657510	7395490	6025650	7328610	6415230	2584310	3575220	8793270	1126030	4533400	9314070	6093800	2535140	3331410	5868340
P9WIX5	nudC	NAD-capped RNA hydrolase NudC	-0.20903	0.240306	0.642348	1.08251	-1.70074	2.27503	1125020	1712380	1138540	1554020	674417	1701360	951824	873773	1020150	949794	2249300	1036000	735859	1723450	1457900	1830770	2166200	350247	417451	NA	218504
O33332	ltp1	Probable lipid-transfer protein Ltp1	-0.209894	0.0999058	0.229456	0.0720148	0.0874103	0.135773	6821500	6304470	5961450	7102220	4444280	5424120	5734150	7462360	4040500	6268050	7686150	1930390	3272220	10157800	2134500	6174460	7803860	9864260	5215020	5429650	7237970
P9WH31	rpsF	30S ribosomal protein S6	-0.210005	0.10082	-1.04693	0.595112	-0.794658	0.269355	80280700	102950000	165560000	77013200	168652000	158421000	153724000	77627000	176880000	88919300	63504300	229800000	284641000	34301200	118054000	114503000	14355300	49482600	127755000	128737000	35607500
P0CH91;P9WPB7	cmaA1;mmaA3	Methoxy mycolic acid synthase MmaA3	-0.210734	0.0679664	-0.864143	1.58128	-0.219248	0.0695244	7696510	6206130	12002500	6124660	2672010	7979810	7412730	6190790	NA	8178240	6405320	7957410	6326640	4360240	NA	4072350	3138570	NA	6367630	7399020	6046200
P9WL01	Rv3292	Uncharacterized protein Rv3292	-0.210777	0.663821	-0.545774	2.64359	0.0551512	0.0736397	11039700	11422000	11817400	12824600	12095900	11904200	11095800	11215900	12375800	10915000	9223060	9507160	8561270	9459330	5933640	9949210	6731070	11885300	13550300	12670500	8585510
P9WPC7	Rv2667	Uncharacterized protein Rv2667	-0.211463	0.00238278	2.07147	0.945351	3.49945	5.06964	1740030	2801170	3771620	2380740	4923030	5046300	3445670	1407350	3846450	2105330	1667250	4028300	9278390	7415300	21642000	21550100	4584790	24375600	61345400	52676700	25260100
O53773	Rv0576	Probable transcriptional regulatory protein (Possibly ArsR-family)	-0.21181	0.444621	-0.563927	1.32227	-0.347948	0.349745	15863600	12699800	15273100	16754700	7608620	13547400	12850200	9612040	13018200	13603700	12236600	9183210	11158500	14783200	1547800	8314400	10014100	13725600	10515600	8720940	10772800
O69668	egtE	Probable hercynylcysteine sulfoxide lyase	-0.212511	0.688406	-0.345968	1.12325	-0.241353	0.973675	5116470	5338030	6198380	5401500	4918420	5915050	4395590	4884700	4329100	5291720	3845990	3633900	5768410	4069390	3349460	5660830	4330320	3743470	4828320	4203110	4870240
P9WNL9	embA	Probable arabinosyltransferase A	-0.212579	0.233565	-0.43607	0.607971	-0.285874	0.0679119	10966400	9564140	8716660	13046000	6575110	9702810	6192230	9624030	7133660	8711830	9951900	6057620	7795750	8987630	NA	5860260	7069290	11633500	6934650	8730670	6959200
P9WIT5	yidC	Membrane protein insertase YidC	-0.215636	0.412058	-0.237856	1.2275	0.377755	0.651556	13069200	8248050	12058200	15095000	11405800	11421600	10323200	8510000	9192900	13353600	11517100	10478900	7903880	11302700	2349640	8068440	11533100	16364600	13316000	12528400	17328900
P9WFU7	lysX	Lysylphosphatidylglycerol biosynthesis bifunctional protein LysX	-0.215724	0.013051	0.0578243	0.260434	-0.527502	0.339884	4434500	4076640	3679930	4650120	1810790	3229710	2918190	4697740	2432410	3492590	4696950	2195690	2845090	4406510	5747660	2541710	3254330	3946940	1788990	2514890	2591050
P9WN07;P9WLV1	Rv1524;Rv1526c	Uncharacterized protein Rv1526c	-0.216961	0.0171726	0.121716	0.145033	0.0319819	0.0039829	873093	1174680	1274050	468839	790567	1911810	588937	1491710	NA	640684	751188	1111200	710803	949950	NA	1041670	313208	1546450	1287190	498138	473252
P9WGD7	ffh	Signal recognition particle protein	-0.217795	0.382221	0.822092	3.26171	0.76936	2.12443	15233900	14888700	15674300	14212800	19570100	19153200	20446400	12342200	15851400	10706300	12076400	21390300	14613800	24415700	31007600	38726900	21007000	22217100	30810000	29848300	23585800
P9WIE1	bcp	Putative peroxiredoxin Rv2521	-0.218905	0.202047	-0.635797	2.18593	-0.0676918	0.000585081	20646000	24459700	29439600	24646300	22129200	27915200	19619100	20944400	29955200	17704900	17856300	28474200	21088000	18231400	9282050	17967700	13516100	22272000	29834600	24405100	15974700
P9WFV7	glyQS	Glycine--tRNA ligase	-0.218924	0.438212	-0.70449	3.19868	-0.412379	0.727664	25578500	23497800	22255700	24571900	19574100	24275900	22561600	23021700	17954600	24949700	22424300	16738700	16508200	18628800	5051020	14269500	14569800	22991400	17765200	16634700	17546500
P9WGB5	metZ	O-succinylhomoserine sulfhydrylase	-0.220111	0.300964	-0.326771	0.647662	-0.873809	1.51117	13736500	14771800	12927600	15048100	10366300	12980500	10291800	12127100	10073600	14103500	12298400	8690230	10160400	15979800	4083470	10415500	10283700	10407900	7223880	6943150	5454260
P9WJS5	mnmA	tRNA-specific 2-thiouridylase MnmA	-0.220693	0.351007	-0.278721	0.375901	-0.214907	0.189858	2605410	2599580	2807310	2613080	3882200	2403330	2386180	2235840	1869760	2673840	2737240	1999500	NA	2834610	859044	3477250	1460780	3124910	2791730	1501840	1697920
P9WLA7	Rv2468c	Uncharacterized protein Rv2468c	-0.220743	0.541988	-0.303544	0.0822882	0.202766	0.161521	30390200	46811900	49371400	34185500	39113200	45577900	39051600	16434100	36891600	33779300	20335600	33348600	51263200	23206900	40176800	60258800	17666300	31026700	60992000	59004300	26930700
I6XD69	pks12	Mycoketide-CoA synthase	-0.221665	0.0990921	-0.57482	1.44953	-2.14503	3.47086	10469200	9090150	9630640	11309800	4052900	8930550	6788700	9603380	6392410	9198560	10603600	5852200	5625680	8189820	1453810	4734770	7470940	2397150	1759040	1800910	2309470
L7N686	Rv0078A	Uncharacterized protein	-0.223796	0.0798906	0.234262	0.623659	0.178088	0.38704	7071750	9279110	8081410	7076500	9706250	10510100	9660090	7717980	10744100	7289950	6019250	10134800	8173600	8081130	13749000	14131400	6797030	7100960	14006100	13895500	6626060
P9WHE3	rplL	50S ribosomal protein L7/L12	-0.224126	0.0626932	-0.599709	0.576957	0.250639	0.215984	75427500	106868000	115578000	106260000	81866200	180028000	162629000	92534000	116907000	75036900	76968000	90448300	236762000	44795000	93948900	113902000	47092700	104337000	210349000	149952000	78525600
P9WKE5	pyk	Pyruvate kinase	-0.224182	0.0667316	-0.415306	0.508148	-0.442949	0.107411	38460800	31929600	35180100	34589700	18069100	27900500	21002800	32792500	24537700	30130900	34877800	22287200	20881500	35826600	8876330	25644100	22241400	36265400	21917900	24757800	22218900
P9WN43	glgC	Glucose-1-phosphate adenylyltransferase	-0.224913	0.767749	0.167783	0.0535016	-0.629139	0.499167	4367970	3164260	3727590	3237060	4258910	2594890	2435640	2668850	2870710	2926210	2895470	764130	553786	5603130	1377480	3758460	3514120	3869090	1771280	1078940	2414640
P9WMR9	dhaA	Haloalkane dehalogenase 3	-0.228832	0.822053	-0.639331	1.71018	-0.0270524	0.0568505	44165200	56068000	52975100	47852100	59558800	66688000	67563300	33813900	70550000	45015200	29386800	50673300	53601600	30256000	36878100	45489600	35114400	38754100	68549500	54855200	55197700
P9WNS9	dtd	D-aminoacyl-tRNA deacylase	-0.22905	0.331362	-0.767425	0.223779	-0.0640219	0.0512878	387122	1245960	1212300	559924	632073	1051120	732612	299472	NA	625062	209098	1322750	719203	288461	572307	1310620	121801	264444	1158350	1137180	145129
Q93IG6	Rv3365c	Conserved protein	-0.229076	0.277804	-0.760532	1.66641	-0.656596	0.66442	4871800	5446940	5004200	5294460	3281090	4906150	3670090	4951590	3429970	5647940	4941700	2259730	2635770	3970910	1137200	3397740	2394250	4629100	2743540	3321090	2903570
P9WKL3	Rv0559c	Uncharacterized protein Rv0559c	-0.229094	0.168103	1.05093	0.517125	1.10096	0.45939	5759480	10494200	7608030	6052270	19584100	7542100	17093300	4475900	14148700	8167640	2831280	4814250	13899700	4573730	29115100	26952000	3388380	7514050	25124100	28604100	6888910
P9WJ73	Rv2179c	3'-5' exoribonuclease Rv2179c	-0.229239	0.454484	-0.152973	0.143614	0.179225	0.215984	5655240	8687030	10001600	6592750	15938000	9156580	10598500	5302340	10020600	6464800	4418500	9157880	9478110	4996320	10698400	11041400	5772370	6461990	16296700	13604300	7131240
P9WHE7	rplJ	50S ribosomal protein L10	-0.229554	0.258895	-0.2827	0.148265	0.209469	0.0146075	171019000	247996000	417657000	173242000	352589000	340884000	553845000	108540000	403592000	185178000	96953300	396301000	468309000	82982200	395036000	398454000	165412000	116213000	419524000	439520000	368779000
O69724	proV	Possible osmoprotectant (Glycine betaine/carnitine/choline/L-proline) transport ATP-binding protein ABC transporter ProV	-0.230211	0.175011	0.202366	0.638282	-0.337843	0.104982	3185080	3141620	2837500	3073910	2253260	3104530	1815770	2499940	1962290	2291530	2855380	2758090	2741140	4476610	1776750	4539280	2596970	2809000	2356160	2501580	2362720
P96264	lpqL	Probable lipoprotein aminopeptidase LpqL	-0.23116	0.10582	0.0408035	0.169798	0.198918	0.202228	17199400	13264400	14564300	14807400	9032040	12936400	16398500	14181000	9890910	16700300	15988600	8896860	10635100	17539100	2386870	12425100	21816400	19070500	14364400	12841600	23049400
P9WQG9	aac	Aminoglycoside 2'-N-acetyltransferase	-0.231855	0.000604124	-0.174536	0.0613866	-0.27904	0.018155	3025260	2656930	2928330	3235210	2106890	2174800	1912200	3169960	2239840	2285120	2925600	2046570	2195050	5396190	627275	2550440	2157920	3685440	1900980	2478380	1375070
P9WP29	dagK	Diacylglycerol kinase	-0.233166	0.123415	-0.445838	0.12824	0.328969	0.531408	4971090	5642890	6443060	4509910	6398980	7938600	7094740	4409320	5392590	6129990	4416890	8505810	5495480	3915100	5480620	8680090	2332320	5141220	10934500	11165500	3850240
P9WIW1	nuoL	NADH-quinone oxidoreductase subunit L	-0.233188	0.412623	-0.237186	0.462336	-0.0159944	0.0751638	10763400	5838720	8412500	7632730	3782230	7493250	5336760	6167630	5074660	6582180	7137190	6622340	5145730	6357260	NA	4889370	7012570	8467210	6251150	7503020	7318250
P9WKR7	Rv0875c	Uncharacterized protein Rv0875c	-0.23377	0.00238278	-0.315652	0.388699	0.119727	0.142009	5356270	6912220	7541930	5772840	10619100	9397630	7906030	5127010	9825900	5550850	4651750	7276610	16044900	7014630	4546570	6779880	5339820	8621260	10976200	7767800	5956910
Q6MWZ8	TB9.4	Conserved protein TB9.4	-0.234519	0.40064	-0.538353	0.947397	-0.262994	0.189719	77611300	114206000	108595000	76702000	129430000	97797200	69658300	82396000	104930000	59905300	57766500	83853000	101445000	61738700	72939100	90077800	33924700	63295800	114447000	99704100	37960200
P9WHN9	php	Phosphotriesterase homology protein	-0.235189	0.500778	-0.185082	1.13662	-0.232191	0.335123	11334800	7618180	8939190	8420030	5590550	7779020	8291970	7830580	5999120	8293600	7071510	4061410	7017770	7693290	1435420	7268200	7319020	7955320	5678690	6868680	7249910
P9WMF9	devR	DNA-binding transcriptional activator DevR/DosR	-0.236783	0.121421	0.255114	0.322461	0.107792	0.175973	6055800	13112600	14332000	6877700	18903500	16554000	16820100	3941730	15970900	8354390	2741990	16385200	24405700	5864180	28344300	28590200	4429420	6722550	28835100	22065400	8822290
P9WJR7	moaC2	Cyclic pyranopterin monophosphate synthase 2	-0.237148	0.0921922	-0.327824	0.351473	-0.796905	1.07055	1963010	2448110	3280260	2789200	2049850	3282050	3399460	1611440	2413770	2319060	1367900	4776830	3964090	2109760	2097660	2562200	2334760	915750	1803220	2317880	1407610
P9WGK1;P9WGK3	devS;dosT	Oxygen sensor histidine kinase response regulator DosT	-0.237453	0.397713	-0.428742	1.03795	-0.716916	1.77144	6760730	7777720	8200830	5758420	7961960	9519700	9144180	5130020	5769260	8377780	4309360	10774400	7738070	4270960	3389640	8205650	7559070	3200850	5121340	4705110	4982950
I6Y9I3	Rv2509	Probable short-chain type dehydrogenase/reductase	-0.23787	0.0714667	-0.422902	0.214398	0.12555	0.152597	32832300	39772200	53675800	32045800	57919400	51972400	64612300	28477000	65496100	34413400	25450700	77348400	53731400	27275400	47288500	52183600	30246300	30443400	70937100	67045200	46350600
O07256	Rv0332	Conserved protein	-0.238465	1.27652	-0.400102	1.58128	-0.28078	1.3108	7632050	10021600	9936610	8002260	7766590	10182500	7404910	7289160	6005980	7396260	6533140	6784320	6781860	7502590	4141380	8651200	4625710	6273280	7547820	6900770	4551600
P9WQG1	fadE25	Probable acyl-CoA dehydrogenase fadE25	-0.239078	0.583444	-0.602665	1.84938	-0.230238	0.00949773	101534000	91309200	100380000	104283000	53952200	85172700	96980800	82786900	83822000	88316800	81554200	54468300	61853100	79482400	26371400	70310700	57420100	109119000	80554600	84796500	79883200
P9WGZ1	rpoA	DNA-directed RNA polymerase subunit alpha	-0.24015	0.418041	-0.635214	2.26837	-0.332058	0.480299	153021000	138957000	151462000	138362000	87295600	146303000	150108000	139277000	119021000	139940000	128716000	97516300	99884500	122769000	46631600	103523000	84870000	128368000	118049000	114398000	103194000
P9WP43	cut7	Carboxylesterase Culp1	-0.240871	0.30845	0.156132	0.47199	0.748679	2.49272	7432680	10405400	10257000	8785670	7335380	8573080	10529300	9673370	9785550	8704310	5837800	3541360	6165160	8811980	10230200	15000700	9349470	11682900	17841400	19198500	11608400
P9WGQ7	Rv1144	Uncharacterized oxidoreductase Rv1144	-0.241644	0.033766	-0.425785	0.290634	-0.0452314	0.0982183	43998300	47106500	60790900	35825600	73903100	63192500	64960300	43651000	72589400	43439200	31927100	84834500	59180600	33379800	58801200	57129800	26623400	36859400	79912600	75891300	41937800
P9WNE1	fgd1	F420-dependent glucose-6-phosphate dehydrogenase	-0.242543	0.379364	-0.00735698	0.0602256	0.139801	0.494253	14387400	15717600	14990700	15497200	9698420	13059700	15925000	13080500	12261400	17640400	13695700	7519700	10624300	17090600	8470110	15431500	14397400	17355800	15933400	16812400	16219700
P71730	Rv2413c	DNA_pol3_delta domain-containing protein	-0.244767	0.249813	0.257161	2.45522	0.115867	0.664405	4342730	3435090	4432610	3907290	3262160	4391410	4770050	3616450	4107120	3610390	3713660	5267230	2945980	5272570	4894490	5728210	5107640	4171710	4733630	4678160	5377300
I6X8D2	pks13	Polyketide synthase Pks13	-0.244774	0.15995	-0.821494	2.2158	-0.738121	0.938584	103405000	96975000	95944700	104735000	43654300	84589200	84390600	89209700	72735000	101602000	89787100	66394200	62885700	73791900	15521900	53978000	54603700	79917600	54957700	58898400	56143100
P9WNX7	gabD2	Putative succinate-semialdehyde dehydrogenase [NADP(+)] 2	-0.244911	0.0438495	-0.0732605	0.0810898	-0.103055	0.0583859	63086400	45032000	48984700	50486400	29371300	39902400	35535600	51900200	32939800	39752300	53032900	36249800	36009600	65473700	16129300	44738800	40865900	64106900	39627000	44227900	36400000
P9WG95	ilvA	L-threonine dehydratase biosynthetic IlvA	-0.245205	0.0921922	-0.144221	0.359191	-0.490071	0.470245	13706600	11685700	12308700	13040600	4729640	8652560	10853300	12869300	7720160	11998200	13111700	5328440	5762800	12803600	1813560	8834030	12314000	9804480	4273070	6835720	10688400
P9WK29	Rv1899c	Uncharacterized protein Rv1899c	-0.245539	0.0706112	-0.0332284	0.066267	0.651176	1.52126	24186300	31057600	33999000	23017900	41034700	37413600	24940400	23438400	36364900	22149500	20705900	28955800	47004700	26389200	34311700	44092100	19668700	33438800	64109900	66325500	29872200
O53945	mycP5	Mycosin-5	-0.24569	0.0115169	-0.401509	0.404127	-0.301434	0.0930072	1807170	2371000	2659970	2611140	701362	1942150	2352740	2502560	1818360	3021910	2150300	1763150	818567	2041690	695174	1520670	2756010	2522550	1652130	1260720	2166110
P9WLM9	Rv2008c	Uncharacterized protein Rv2008c	-0.246015	0.236491	-0.534884	0.551625	-0.185183	0.176908	3263380	4871010	4804760	4311090	6561550	6183310	6165070	2589220	6692610	3408510	2650670	8339780	4806180	2481340	3773320	5466470	2950760	2191060	6267780	4948490	3619980
P9WPK3	carB	Carbamoyl-phosphate synthase large chain	-0.246862	0.320771	-0.592827	1.26813	-0.475925	0.195821	9152960	7749760	7610260	9143900	4556030	7029380	6543810	8082670	5189580	7637170	7772680	3853900	3564770	7089400	1358830	4475890	5615960	9196950	4927330	5310860	5632780
I6YBZ8	htdY	3-hydroxyacyl-thioester dehydratase Y	-0.247342	0.985546	-0.826427	2.9295	0.104992	0.0644488	87568600	79168100	83200000	76328600	74189800	79561100	73982600	76472600	70047500	74373100	63342400	36596500	50121400	59852900	26280800	54017900	35271700	92017200	82229900	88058900	50404100
I6XFZ8	Rv3035	Uncharacterized protein Rv3035	-0.247884	0.10082	-0.449582	0.195308	-0.191412	0.224421	5726600	6102140	6719530	6244130	2854000	5544290	4318440	6190780	3643180	6242840	4914040	4731050	3841160	6012200	NA	4083730	4193330	5115430	5465300	3493030	4914690
I6Y4A5	Rv0634c	Possible glyoxalase II (Hydroxyacylglutathione hydrolase) (GLX II)	-0.248186	0.2044	-0.297306	0.561366	-0.042297	0.0383592	5204850	7702010	5993260	6978130	4959620	5333210	6289250	6799680	4782020	5571940	5046050	NA	4402120	6162420	3745050	6009230	3360450	7470360	5871680	5768520	3067760
P9WG75	thiE	Thiamine-phosphate synthase	-0.248296	0.32047	-0.0315192	0.0934567	0.25984	0.111282	9364330	11606900	12442100	10166200	18042700	15305500	15899400	8358120	15542200	8911370	5960820	12038400	18947000	7973800	15412400	15554500	8934040	9756370	17965900	17144500	12650500
P9WKL1	icd	Isocitrate dehydrogenase [NADP]	-0.249165	0.134398	-0.709876	0.883282	-0.44966	0.305831	2975240	3277560	3846190	3784580	2563000	3420120	2263430	3820820	2682820	2832550	3639600	1516250	2277010	2867410	NA	2003810	1212980	3754430	2371660	2428100	1255900
P9WK95	leuD	3-isopropylmalate dehydratase small subunit	-0.250434	0.324016	-0.343641	0.15881	-0.869603	0.636135	16742400	38074500	49263800	19000000	38488300	46714200	64286700	12924100	47714500	22308700	12878300	42401200	54603900	7581120	52539900	50000000	10661400	7980590	27861100	28541400	14268000
P9WGI3	sigF	RNA polymerase sigma factor SigF	-0.250459	0.371421	-0.277427	0.418668	-0.150609	0.285014	3396470	4237770	5143660	3043160	7089060	5920630	7262050	3395480	5709160	3603700	2037490	5044120	6550880	2147970	5167880	5412360	3319790	2350400	4984910	5074170	4282630
I6Y897	Rv0613c	Uncharacterized protein	-0.250467	0.0705995	0.161888	0.140228	-0.885229	0.601424	23168000	22816400	22560800	24884300	13276400	20273900	18487600	24242300	14196600	23496100	23518600	13079000	14434200	35093000	6995210	25792000	24687800	19850600	10502000	10075000	13926900
P9WPT1	ctpE	Calcium-transporting ATPase CtpE	-0.251661	0.549728	0.331631	0.0946245	0.211755	0.207045	3214940	2917930	2445760	3395420	1807430	2078880	1513450	1797410	NA	2311120	2409730	1017160	NA	3464420	NA	1639300	3077830	3678680	2646560	2206330	3018290
O53156	Rv1465	Possible nitrogen fixation related protein	-0.256823	1.16174	-0.489688	0.700923	-1.00427	2.30438	1283010	1848460	2111750	1869850	1850850	1815590	1481260	779328	NA	1870360	1547030	NA	NA	1214350	1418520	1831190	1049590	681737	976147	1313150	866855
I6WZ58	Rv0713	Probable conserved transmembrane protein	-0.257113	0.233306	0.58157	0.17672	-0.420039	0.269355	2368570	1857460	2653730	3562850	789871	2499210	3796560	NA	1538780	2304210	2091240	3194210	1093990	3867920	NA	1499470	3740010	2343440	1201910	1392400	3302080
O07171	Rv0121c	Conserved protein	-0.257353	0.10082	0.290597	0.305698	0.528514	0.378303	1493360	3170490	3893520	2011550	6183980	3647760	5431500	1880260	4598320	2268530	2156530	6037820	3835060	2918740	6935200	6004750	1879570	2245510	7454140	6982810	3540560
P9WNL1	eno	Enolase	-0.257474	0.418784	-0.225779	0.835477	-0.0606842	0.00290165	102783000	91900900	93411600	102722000	83062400	91614500	92011000	102220000	67831800	108014000	86112100	40026200	54677900	100172000	29653800	78865900	78497400	112170000	86736800	89705200	82605600
I6XYM2	dsbF	Probable conserved lipoprotein DsbF	-0.257607	0.0990921	0.0144442	0.0749768	0.717111	0.958072	2261910	2470620	2252980	2833640	1769280	2217340	2140910	2030430	1954890	1556900	1623010	1814230	6476940	2864930	1285070	1686370	2991550	3741920	3144680	3665370	4046630
P9WHP1	pta	Phosphate acetyltransferase	-0.257993	0.365301	0.0409693	0.140406	-0.102276	0.0372869	7010360	4073440	4894890	5215670	2668120	4000490	4199650	4721670	2829810	4194110	4235010	2113840	1625110	7205650	764768	3576860	5064380	6745680	2751380	3539860	4284610
P9WN65	rmlB	dTDP-glucose 4,6-dehydratase	-0.258639	0.134805	-0.547845	0.956773	-0.463883	0.154675	14570400	13463400	12675800	13237900	7022440	11067900	10962100	12663100	8819660	10982900	12859000	9397240	10207900	11520200	4370510	11125400	6216140	14835300	8586700	9794030	8131480
P95149	Rv1866	Probable CoA-transferase Rv1866	-0.258917	0.986859	0.183192	0.0289419	-0.394351	1.23953	3762160	3471200	3264400	3842900	2496630	3480750	3507280	2776820	3041010	3060640	3065120	1648370	2322010	3952020	NA	2608750	4191100	3221690	1454530	2264930	3031600
L7N655	pepN	Alanine aminopeptidase	-0.259667	0.13682	-0.0205968	0.0361224	-0.503888	0.217448	42596200	34887800	33537400	38471200	18669800	29181800	30007600	39192600	21522600	34503700	34893800	15302000	20511900	49451300	9791750	34797800	31326200	37585600	19276400	23091900	24209500
O06135	tesB1	Probable acyl-CoA thioesterase II TesB1	-0.260161	0.691708	0.143826	0.0677184	-0.0269579	0.151467	1417190	1903060	2425900	2390650	1849540	2837820	1830600	1265960	1534180	1263420	1643910	2312750	2228650	2319850	1130300	2640310	1885270	1830620	2228360	1905040	1228740
O06307	Rv0356c	Conserved protein	-0.261703	0.714105	-0.420291	0.789469	0.06188	0.0114086	19877400	26731100	28484800	23821400	51263200	34081700	35858000	18487800	33035900	22161500	14847000	30769900	25357000	16866200	25705700	28702700	13183100	20591500	41935400	38712400	20753900
P9WK21	map-1	Methionine aminopeptidase 1	-0.261798	0.652362	-0.664445	1.87643	0.258993	0.182689	6900790	7882360	8799280	7785280	8188100	10333400	10275100	6815610	8816430	8681610	6233990	6842920	6015250	6516760	3815500	7257030	3704880	9272670	10923900	10323800	4737150
P9WGH7	sigK	ECF RNA polymerase sigma factor SigK	-0.262769	0.284111	-0.0988897	0.102296	0.191607	0.28225	11818000	13652000	14578400	10772000	17206700	15559700	19080500	9934210	14936500	9693410	8147960	14367600	21908800	11439900	15785300	16523900	8467580	12038600	20359200	21573000	12938900
I6Y242	Rv2956	Conserved protein	-0.266219	0.0351865	-0.462723	0.462112	0.292542	0.103627	4651450	3269800	3659520	3303120	2954730	3847970	3106230	2415860	3321160	3008310	2484750	2087420	9991880	3127800	2147790	2016630	2645800	3897240	3666750	4194060	4614930
O06391	Rv0525	Uncharacterized protein Rv0525	-0.266842	0.36746	-0.784402	1.27818	0.304912	0.58972	7209520	8609280	8287980	9889690	8826660	8960460	8231480	6624130	9005090	7464290	6799670	8633840	6846690	4779460	5217510	8509890	3441490	8560430	12710400	12914000	5252490
P9WH09	rmlD	dTDP-4-dehydrorhamnose reductase	-0.267603	0.397713	0.904425	2.78857	0.501688	1.18264	2552100	2566330	2273330	2309260	2278500	2704100	2481370	2139000	1426230	1874320	2370890	1983540	2313950	5094120	2411880	4408670	4880580	3997520	3260230	2930810	3766360
O06769	Rv0669c	Neutral ceramidase	-0.267781	0.0921922	-0.187375	0.229563	-0.299966	0.0798263	4707610	4360790	4839450	4931480	1788680	4278940	3482910	4224050	2191120	4192060	5607280	3052050	2717500	5107940	857393	4119450	3539860	6943970	3139190	3908520	3175770
O07234	Rv0307c	Uncharacterized protein	-0.267865	0.302198	0.865618	1.76823	-0.171021	0.0545291	5970260	7831890	10298000	7549730	8092460	10678100	8924560	3290160	8912880	5150870	3269360	10485800	8291480	9765970	19724900	25857800	6636950	4737700	10194800	9637970	4055710
P96221	Rv3856c	POLIIIAc domain-containing protein	-0.268369	0.399654	0.61621	2.80616	0.265403	0.305831	2021370	2233900	2075910	2382890	1513410	1929250	2312310	1734390	1498300	1712690	2256840	NA	NA	2923260	2456900	3728410	3440830	2676640	2313730	1824370	2797030
O50397	Rv3368c	Possible oxidoreductase	-0.26853	0.0194497	0.0354129	0.195308	0.0763211	0.249588	14125200	20413100	16973100	19942800	19877200	19788500	20984500	13762700	24184700	17478300	15524400	13962200	35471000	16172300	24570000	25508200	14721900	17482700	24431400	27295400	16863000
P9WF51	vapC49	Ribonuclease VapC49	-0.268703	0.0714667	-0.26234	0.00815163	-0.520393	0.18988	NA	1269530	1179240	704868	1162470	1206180	303584	NA	1586490	971886	609901	610474	1522730	168830	1544830	1318610	633754	NA	492545	855221	816299
P71741	Rv2402	Trehalase	-0.26897	0.0759118	-0.174748	0.0493773	-1.16955	1.09394	5388830	4677870	4745450	5270400	1602840	3732540	3653430	4905750	2993100	4771340	5384910	1933070	2507770	5900370	NA	2882300	4144230	3770590	1155760	1624420	2534770
O53168	ripA	Peptidoglycan endopeptidase RipA	-0.26897	0.866381	-1.11804	2.81228	-0.00704566	0.000585081	2729960	4169740	4083570	2567460	6004660	3656780	3552720	3055950	3162460	2108290	2556990	3013660	3896270	1095940	2093390	2557590	1276110	3327130	4692150	3950800	2794620
O53158	fadE15	Probable acyl-CoA dehydrogenase FadE15	-0.269326	0.411215	-0.906702	1.86088	-0.678556	1.02864	5246430	5732960	4398110	4857200	2349460	3650460	4474900	3757450	3668260	4375970	3288740	3279890	4315080	4066860	1246590	2928930	1844920	4183980	3066280	2525470	2004600
P95272	mazF5	Probable endoribonuclease MazF5	-0.270223	0.0362149	0.643642	1.22543	0.222649	0.285041	4412940	4600960	8609800	4237830	9403270	7849670	7896120	4062440	11604000	3688750	4030870	8955320	13632900	5764600	19350600	18231700	6294870	4997050	11031800	14539700	7287350
P9WN23	glbO	Group 2 truncated hemoglobin GlbO	-0.270593	0.0351865	0.272673	0.260586	0.547703	0.627008	5464170	6796460	7617020	5617320	3871170	8348380	9440000	5532540	7597570	5735700	4162760	5260040	11643800	4162840	9718950	10968800	6701890	5405130	12702700	10497400	9372140
P9WMW1	glgP	Glycogen phosphorylase	-0.271457	0.190827	-0.561138	0.569471	-0.474364	0.131182	28727100	30016700	26770400	33412300	15002200	26427700	20468600	25454600	19535400	24483700	26401400	19340100	19873900	32907700	5294600	21607100	14681100	34237600	19058700	19479100	14111500
O53512	aroG	Phospho-2-dehydro-3-deoxyheptonate aldolase AroG	-0.271755	0.340234	-0.417288	0.79586	-0.153945	0.00949773	28222300	25105000	25184300	29946900	14513700	22132400	21220700	23909800	16722100	21789400	23383000	15894400	19800100	26604300	8447980	19269700	18329100	29688000	19534900	21147500	23980700
P95227	fadD2	Probable fatty-acid-CoA ligase FadD2 (Fatty-acid-CoA synthetase) (Fatty-acid-CoA synthase)	-0.272321	0.197821	-0.159006	0.307045	-0.60833	0.648316	57748800	56126000	53154500	63113000	27754000	50380300	42517700	46708300	38103500	51785800	52917800	41314100	40141100	62493700	16316900	49672600	45542200	48627600	32046100	29488300	37687900
I6YG46	gadB	Glutamate decarboxylase	-0.274113	0.348739	-0.926433	1.71018	-1.71068	2.58627	5966870	6418890	6316390	5684010	2247620	5379840	4106360	5659340	4425690	5431050	4975190	2160220	2327160	4635290	763444	2449400	3531970	2471890	1685810	1108650	1787300
P9WIB7	Rv2951c	Phthiodiolone/phenolphthiodiolone dimycocerosates ketoreductase	-0.274617	0.200634	-0.358673	0.165037	0.189791	0.186328	53215100	74930000	79871200	62630100	98262000	95994400	102508000	42697700	115835000	53638600	37268800	108592000	78415600	38249000	86331200	105450000	27300700	57765900	137121000	124436000	44321700
P9WGY7	rpoC	DNA-directed RNA polymerase subunit beta'	-0.274681	0.0178553	-0.703601	0.945577	-0.731315	0.337615	158015000	143301000	142458000	169614000	58567500	118623000	94273200	144378000	102146000	133375000	153893000	97887000	96476900	134541000	26704300	91906800	83042300	145189000	77791300	85555400	86065100
P9WJN5	mscL	Large-conductance mechanosensitive channel	-0.274854	0.000943618	-0.552016	0.329685	-0.0375453	0.0348749	8141120	6743500	8897180	6457650	8062270	8860480	15017700	4977560	7686070	5771750	5255490	9531750	23923800	5865030	4178490	5240540	12907900	4491020	7994490	7869480	17691700
P9WM01	Rv1362c	Uncharacterized protein Rv1362c	-0.27538	0.597686	0.194742	0.678602	0.0389923	0.0282485	5390670	4585900	4402290	5035400	7396560	3884050	2929660	3789020	NA	5692420	3912620	2898030	3302350	7183390	NA	5248650	4622160	4495060	5169560	4314650	4928010
I6XI16	Rv3718c	Conserved protein	-0.275764	0.518422	-0.458244	0.881818	-0.052546	0.0474331	31262100	34776500	39293400	23797800	61992200	48941900	51380400	30370700	42821300	29162500	21311900	50502400	34543000	30303300	26897800	39927600	18651300	31457000	48545400	44319000	31002400
O33313	Rv2771c	Uncharacterized protein	-0.276248	0.208651	0.108573	0.324084	0.0792091	0.0197819	2638000	3398200	4188490	2172190	3724660	4306560	4376340	2324270	4519350	2183060	1431630	3826900	4885820	2982910	5048660	5313710	2945090	2308120	2818810	5050940	5077760
O05777	Rv3099c	Conserved protein	-0.277134	0.581302	-0.251774	0.47989	0.120945	0.142009	31503600	35642100	39230200	34085100	52661300	43681600	44403000	27891200	44808200	28534500	23732800	37682800	36213300	29958800	35937200	41243400	16218500	31443100	53878400	55888100	26295300
P9WJQ3	narG	Nitrate reductase alpha subunit	-0.277152	0.269611	-0.994845	2.0602	-1.18909	2.0105	11099000	10030500	8567530	10863700	4713920	7765090	7631030	9214420	6002560	8137610	10197200	5232950	5515360	7937900	1122720	3790890	4807310	5970430	3260180	3422420	4092690
P9WMF5	lysG	HTH-type transcriptional regulator LysG	-0.27856	0.0365621	-0.430311	0.991329	-0.144806	0.308122	1305850	1349040	1854030	1279150	1610940	1464980	1413890	1165630	2259060	895741	808706	2287500	NA	703507	1217070	1010070	1088430	733047	1383910	1495470	1173820
P9WIS9	aceE	Pyruvate dehydrogenase E1 component	-0.278706	0.0659445	-0.714632	0.657859	-0.757738	0.354264	67490300	65533600	61134000	74319400	33090600	56299800	42887300	71722100	41340100	59449100	72364300	27151800	36261100	68650100	9180800	45348500	29156800	65733800	33804400	38507700	22755500
O53406	fadD14	Probable medium chain fatty-acid-CoA ligase FadD14 (Fatty-acid-CoA synthetase) (Fatty-acid-CoA synthase)	-0.282404	0.301374	0.0136467	0.262996	-0.108865	0.0198821	8687660	7727430	8476590	8055210	3549670	7758800	7718320	7237560	5521320	7815610	7700780	4605250	4811900	8531810	2383240	7661810	8003270	9255520	5599920	6818420	7571320
P71591	Rv0021c	Uncharacterized protein	-0.283369	0.116147	0.195337	0.200042	-0.694372	0.345988	571234	939385	705101	682594	1102730	835625	966264	687935	1294770	685281	400947	641437	1981080	1047530	1185230	866037	534319	695163	NA	516398	375646
P9WJT9	mmpL11	Heme uptake protein MmpL11	-0.2843	0.086723	0.442653	0.0946245	0.373471	0.199255	2803070	1848650	2005350	3009550	1137760	1941350	2002820	2000140	897514	2758170	3023570	1289050	1265240	3939900	549714	1504170	4454710	3810230	1913070	2070770	3118400
I6XHJ3	fadA6	Steroid 3-ketoacyl-CoA thiolase FadA6	-0.284882	0.387738	-0.233851	0.553602	-0.0259811	0.00879826	7083760	6282450	6776560	6919150	4427670	6337590	7212860	6574360	5283180	6324010	5841340	3511900	3047140	7397000	1837050	4128060	7670120	8643040	4933930	5019390	8291840
O53157	Rv1466	Conserved protein	-0.28553	1.01695	-0.352088	0.974852	-0.198815	0.382578	5344590	4750860	5018940	5363710	3546080	7044630	11204400	4426930	5273550	4342900	4192730	2303320	5039150	3861900	3579050	4512530	5693550	3960380	6325130	4139440	5173680
P9WHL5	purQ	Phosphoribosylformylglycinamidine synthase subunit PurQ	-0.287284	0.353068	0.369533	0.764289	0.122786	0.00636624	24734600	34510400	35802200	25219800	28533100	32511900	47697800	18790200	39463300	26556200	18853900	26727100	40608200	27406700	48008800	56015400	35997700	20444900	39019900	37386300	33413900
O53362	Rv3311	Conserved protein	-0.287367	0.452253	-0.321028	0.989379	-0.146173	0.0208303	30979000	29731700	28986400	34476100	15987100	28370300	28194500	25510400	21992300	32715900	25981800	17399500	14139000	28796400	5712040	21795000	24612200	35635600	27686400	24700400	24615000
P9WNT9	dnaX	DNA polymerase III subunit gamma/tau	-0.287377	0.166393	-0.0793154	0.0511048	-0.463207	0.172315	8899800	9559540	8950730	10657600	4466980	8623570	6639910	8225320	6359500	8441630	9207980	5760410	5974580	11487400	2944450	9838680	7008760	9644430	5633240	6341540	6569790
P0CH91	mmaA3	Methoxy mycolic acid synthase MmaA3	-0.287757	1.0989	-1.06267	4.16896	-0.387974	0.962987	18956200	17592200	27652000	17757700	13050400	19200900	17859800	15764000	14591800	14024600	14668800	14581500	17745800	7731360	9369200	11546900	7217680	12611400	13916300	19410000	13380700
P71847	ipdC	(3aS,4S,5R,7aS)-5-hydroxy-7a-methyl-1-oxo-octahydro-1H-indene-4-carboxyl-CoA dehydrogenase	-0.288612	0.0212359	-0.402256	0.0854171	0.494788	0.573675	1373710	1086410	1429970	NA	1102460	1352110	1837790	547772	2404090	956769	475668	2993400	1274830	810009	1727170	1196550	866008	962550	3649340	2367500	1473490
P9WGX7	rsbW	Anti-sigma-F factor RsbW	-0.28873	0.988516	-0.162186	0.780898	0.337311	0.00949773	9674450	8459830	11368100	8634470	9420190	10987800	17253500	8506820	8686550	8277120	7170070	7562320	6218410	6038830	7261530	10148100	10030000	6033230	12976600	11468800	15555100
P9WJQ7	moeA1	Molybdopterin molybdenumtransferase 1	-0.288867	0.305391	-0.06332	0.488123	-0.19812	0.198367	11978400	10050100	10488700	10166200	7237100	9007520	10086200	10392700	7431840	9080170	9594920	6791160	6325260	10407500	2654560	8898680	11865000	11298500	6169650	7501590	10082400
P9WQ89	Rv2231c	Uncharacterized aminotransferase Rv2231c	-0.288867	0.459003	0.387101	0.453013	-0.73938	0.791405	1433540	1558350	2463480	1566610	2971800	2479850	1090890	840355	1062290	1502390	980204	2537210	1777370	1273810	2810500	4148770	1287010	849679	1027110	1370820	166302
O07169	fadD7	Probable fatty-acid-CoA ligase FadD7 (Fatty-acid-CoA synthetase) (Fatty-acid-CoA synthase)	-0.289365	0.459773	-0.708814	2.41821	-0.382364	0.453976	10734100	11207200	11612300	11056000	6086550	11044100	9553430	8964480	10456700	9109460	7332560	9728110	8222590	8328960	3283810	7293980	6220090	10837700	7505600	7308420	9440010
O86340	Rv2061c	Conserved protein	-0.290513	0.31943	0.166846	0.169798	0.0796743	0.00907409	44231400	66097600	90444800	39050200	68832100	83319600	110420000	40285800	72270000	38762700	32212000	91288200	72475600	37331100	118400000	112080000	42462000	35400400	91445500	101323000	54035200
P95087	Rv3071	Uncharacterized protein	-0.291761	0.788344	-0.21949	1.27348	0.0444016	0.0370214	2665210	1939780	2416380	2224740	2122450	2088490	3009190	2332750	1584300	1480080	1805050	1829750	2322640	2420260	1029130	1712930	2108590	2450540	2320520	2147960	2268030
I6Y8F2	echA4	Possible enoyl-CoA hydratase EchA4 (Enoyl hydrase) (Unsaturated acyl-CoA hydratase) (Crotonase)	-0.291994	0.35327	-0.783271	0.990094	-2.02714	2.29756	1932010	2114340	2586120	2370770	799820	1993640	1303210	1765860	1490840	1981830	2016120	1025380	1303860	1499020	NA	1158400	1102150	639199	NA	NA	339045
P9WNU7	pafA	Pup--protein ligase	-0.292904	0.096247	-0.177928	0.244089	-0.376775	0.148451	14476300	12607700	11665300	13006800	6989570	10497600	10679800	12661300	9728550	9315230	13581300	8899460	8740170	14499800	4783490	11361300	9262290	13667600	9516250	8451980	8077390
P9WHI3	recR	Recombination protein RecR	-0.294696	0.290891	0.572112	1.30452	-0.503073	0.207256	7044300	12442100	14141200	8283610	17781900	15439500	19697000	6708110	14204500	9538460	6443770	14301400	13518600	11932800	30114600	34441900	10373100	5326010	13278700	12480700	7475430
P71815	phoR	Histidine kinase	-0.295734	0.401814	-0.185615	0.720565	-1.23065	2.76631	8154910	8109980	8268750	9345950	8741610	6574780	6130180	7102870	5665960	5903770	8651740	7718100	6184050	7599250	2733520	8511840	6741550	5247000	3257830	2963960	3692200
P71668	lipI	Esterase LipI	-0.295894	0.619717	0.281476	0.0183404	-0.572433	1.20149	9130250	8409200	9528540	9940250	9749800	8646900	8356280	7618520	8377720	7255890	6110300	5925190	8955010	12071500	3882100	10434500	11760000	6753530	5361050	5526320	7207720
Q10690	Rv2082	Uncharacterized protein Rv2082	-0.296236	0.477749	0.24302	0.00396355	-1.11881	2.0105	2562630	2543440	2853160	3227990	1601010	2944210	2299390	2506240	1849510	3125220	2286860	447870	1887020	3102470	1382800	3056250	3009330	1180020	741791	NA	1190700
P9WIN9	mpt64	Immunogenic protein MPT64	-0.296943	0.554464	0.216327	0.179131	1.16779	3.98245	10626500	15185000	16464800	15260500	5561270	11230000	11207500	9836860	14420500	11029900	8445030	3085120	7872510	12871800	11697800	16511000	13221600	18130800	29535400	28451100	22009200
P9WGY9	rpoB	DNA-directed RNA polymerase subunit beta	-0.297096	0.286041	-0.495855	0.990094	-0.596425	0.283583	114400000	103352000	98157700	121588000	45193400	89888100	81629400	91343400	68912700	90866200	100374000	63182300	61879100	96289300	17273000	74923000	64292400	108783000	64110100	65731100	62940000
P9WFW9	menF	Putative isochorismate synthase MenF	-0.29796	0.503682	-0.313479	0.781572	0.195773	0.371541	12805900	13587000	14120300	14756400	16791200	14584000	16366200	10682800	18174100	12010700	9119130	15952000	11714600	13985700	7011960	15448700	9485750	14915100	18831500	18492100	13949900
P71857	fadE28	Acyl-CoA dehydrogenase FadE28	-0.298372	0.138943	-0.757786	0.2584	-0.492416	0.138172	1290480	1046010	1169590	1103130	366660	1283500	650706	910742	NA	883321	817828	2382960	NA	499869	NA	NA	804920	830690	2415090	737594	635162
O33187	Rv1685c	HTH tetR-type domain-containing protein	-0.298501	0.592479	0.105022	0.216645	0.0651529	0.163018	906938	985555	1745720	926606	1414350	1394200	880566	842149	1379870	760554	356740	1313460	748462	1159840	1092900	1027050	641917	428505	1481440	1260040	802127
P9WQA1	gatA	Glutamyl-tRNA(Gln) amidotransferase subunit A	-0.298917	0.454913	-0.272747	0.934727	-0.282209	0.176874	19116000	15783300	16150400	16626000	11691700	13759300	15266000	14555700	11821900	15699400	13837400	9012240	11148300	16090000	4207400	11463800	14665200	19152800	10347000	10952200	15006000
P95202	Rv0394c	Possible secreted protein	-0.299042	0.401814	0.199137	0.0262823	-0.0820518	0.329976	10883600	10483000	9957550	10181800	13498700	15434100	19247100	8629680	11858300	9062530	7201100	8626170	21503500	11642600	11744500	13975200	13244500	9178200	11035800	9527960	14113900
O07422	Rv0178	Probable conserved Mce associated membrane protein	-0.30113	0.183488	-0.124766	0.0326031	0.387817	0.692698	8304950	5872130	7287570	6587430	3821510	6833310	5535870	5123850	3814870	6932110	5857000	5253500	5439430	6509560	2053080	5573800	14231000	8780910	7301520	8457240	15841700
P9WHE5	rplK	50S ribosomal protein L11	-0.301883	0.779702	-0.00415533	0.011777	0.658785	0.716691	111965000	123757000	147489000	101960000	124491000	162254000	188451000	63658800	140076000	77671500	51409400	140275000	124301000	90726700	149436000	184601000	98829900	109628000	230889000	228760000	164321000
P9WNW5	disA	DNA integrity scanning protein DisA	-0.302999	0.272279	-0.310449	1.35684	-0.269041	0.175973	5685210	4387460	5990940	6178640	5923530	5988370	4499710	4190840	4621860	5993730	4980960	5777390	4555580	4333370	198314	5343260	5219990	4847360	4461920	4984170	5668350
O53509	Rv2175c	DNA-binding protein Rv2175c	-0.303346	0.0789201	0.618434	0.566573	-0.095097	0.0644488	8340460	15606500	15030300	10056600	29044000	23538500	26423300	4967210	26114800	9436610	4419980	15857500	44116700	7653450	54723100	38939000	8979450	7240820	22348800	17371400	11850500
L7N6A5	manB	D-alpha-D-mannose-1-phosphate guanylyltransferase ManB (D-alpha-D-heptose-1-phosphate guanylyltransferase)	-0.303397	0.09139	-0.548705	1.28149	-0.443748	0.142281	35945500	34739900	34383700	36301500	17466800	30307100	26370900	36009600	21949100	34516200	33620800	20783500	22104300	28675700	7438760	22542000	24469700	35553100	24372700	24270800	26186600
P9WG61	Rv1324	Uncharacterized protein Rv1324	-0.303718	0.262817	-0.304856	0.483511	-0.547301	0.363061	18288700	14633800	14841200	14577700	7410140	15693900	11368500	13573800	9501780	16193600	14829900	6632780	10137700	16029300	3624290	13662700	10030100	13976300	10375900	9047840	9651890
L7N670	galE3	Probable UDP-glucose 4-epimerase GalE3 (Galactowaldenase) (UDP-galactose 4-epimerase) (Uridine diphosphate galactose 4-epimerase) (Uridine diphospho-galactose 4-epimerase)	-0.305503	0.284489	-0.568479	0.891314	-0.363735	0.103612	3360770	3443890	3243590	3342020	2187260	3363080	2882930	3279370	2506660	2915500	2901800	1836240	2148690	3679070	527548	2071690	2435540	4051740	2471800	2060400	2722700
P9WQD1	acsA	Acetyl-coenzyme A synthetase	-0.306265	0.126478	-0.232518	0.290634	-0.571652	0.281638	11976900	11472600	11490700	13521100	5472780	9589170	7745290	9745180	8197930	10285100	11464900	8811360	8387590	11200200	4587870	10996400	8533360	12003100	6682960	7258190	8180390
P9WH85	rplD	50S ribosomal protein L4	-0.306332	1.01588	-0.948458	2.07191	0.189682	0.127183	79396200	78084100	110527000	74162600	174636000	121099000	66245000	58821400	69593300	37937800	46951300	111478000	79247400	46348100	35935900	56345100	13583200	79014700	121020000	102090000	22072800
O05316	Rv1215c	Conserved protein	-0.306718	0.232376	-0.180387	0.359147	-0.28753	0.0489533	9976110	10080000	8693290	9269600	3786370	8586440	6873680	7046110	9303740	7010570	7649350	5688130	6774740	10351400	2297950	6831470	8511600	10250400	6447560	6878700	7366190
P9WH61	rpsM	30S ribosomal protein S13	-0.30747	0.227596	-0.609977	0.374135	-0.155661	0.0474331	94078100	148691000	202278000	92688000	89446700	173872000	135105000	74768200	175421000	73007800	66248300	173252000	143577000	43422500	157118000	133621000	32208500	58194200	172134000	170181000	72392200
I6Y231	mas	Probable multifunctional mycocerosic acid synthase membrane-associated Mas	-0.307488	0.191606	-0.346119	0.576486	-0.0189456	0.419652	33358300	36466000	34599900	35050600	16358100	31559600	22851200	26132100	26177100	27733100	29703800	29828900	25949000	34205200	9715380	27152900	25332900	44778900	30911400	34571700	31274500
P9WQE9;A0A089QRB9	msl3;pks2	Mycolipanoate synthase	-0.308132	0.544982	-1.08249	2.42429	-1.56382	3.03875	39273100	27789700	27399300	26302800	15517600	29376900	22667400	27872000	16831000	24048300	23775900	16682100	20484200	22486600	7138350	14535800	11340800	16711000	8867710	9207120	9328790
O05888	Rv3243c	Uncharacterized protein	-0.309673	0.935657	-0.291394	0.608019	0.279824	0.0886822	2087840	3190290	4695450	2757080	11225400	4856830	2979120	1390750	3051080	2096930	1176400	4620350	3432660	1522430	3691220	4094690	1497250	2919720	4877050	4826600	2759560
P9WKE9	gmk	Guanylate kinase	-0.310622	0.998812	-0.283468	0.789574	0.10632	0.102354	3700490	4316200	4398320	3589510	8974010	4998620	6810910	2330240	5565700	3336100	1879460	3756580	5945920	2886650	4340790	4477510	2829210	3537910	5357880	5836210	4111520
P9WMN1	hisG	ATP phosphoribosyltransferase	-0.310993	0.965573	-0.527281	2.29681	-0.308168	0.432786	12011400	11649900	11882000	11567300	10075900	10412900	10622400	10339200	10063000	10179000	8585490	8442020	7047690	10553500	4021180	7824490	8227710	11570800	9185930	8679840	9499120
P9WGM1	prrA	Transcriptional regulatory protein PrrA	-0.312018	0.345549	-0.15262	0.00365391	-0.0772252	0.0498793	32654100	41427600	46098500	34534300	56757700	48280000	49016700	31066400	43199600	28762600	27492600	56835100	47504100	38578500	44363300	56486000	29093600	32736900	57950600	54654700	31396100
[truncated: 1,049 more rows]

## Sheet: All_identified_proteins
Protein.Ids	Genes	First.Protein.Description	DMSO_LFQ_intensity_rep_1	DMSO_LFQ_Intensity_rep_2	DMSO_LFQ_Intensity_rep_3	DMSO_LFQ_Intensity_rep_4	DMSO_LFQ_Intensity_rep_5	DMSO_LFQ_Intensity_rep_6	DMSO_LFQ_Intensity_rep_7	Ecu*_LFQ_Intensity_rep_1	Ecu*_LFQ_Intensity_rep_2	Ecu*_LFQ_Intensity_rep_3	Ecu*_LFQ_Intensity_rep_4	Ecu*_LFQ_Intensity_rep_5	Ecu*_LFQ_Intensity_rep_6	Ecu*_LFQ_Intensity_rep_7	Ila_E_LFQ_Intensity_rep_1	Ila_E_LFQ_Intensity_rep_2	Ila_E_LFQ_Intensity_rep_3	Ila_E_LFQ_Intensity_rep_4	dCym_LFQ_Intensity_rep_1	dCym_LFQ_Intensity_rep_2	dCym_LFQ_Intensity_rep_3	dCym_LFQ_Intensity_rep_4
[truncated: 3,175 more rows]
