# Supplementary material for: Antimycobacterial cyclic peptide natural products bind and dysregulate stress response chaperones
Source: Research Square preprint supplement (doi:10.21203/rs.3.rs-5493888/v1), 2024-11-28
Supplement: Supplementary file 3 [file ecc8d5f2d97c9d88f818653e.xlsx]

## Sheet: dCym_downregulated_String
#category	term ID	term description	observed gene count	background gene count	strength	false discovery rate	matching proteins in your network (IDs)	matching proteins in your network (labels)
GO Process	GO:0052008	Disruption by symbiont of host cellular component	4	4	1.47	0.005	83332.Rv1755c,83332.Rv2349c,83332.Rv2350c,83332.Rv2351c	plcD,plcC,plcB,plcA
GO Process	GO:0006536	Glutamate metabolic process	4	8	1.17	0.0219	83332.Rv1187,83332.Rv3432c,83332.Rv3858c,83332.Rv3859c	rocA,gadB,gltD,gltB
GO Process	GO:0010447	Response to acidic pH	5	16	0.97	0.0223	83332.Rv1162,83332.Rv3083,83332.Rv3086,83332.Rv3089,83332.Rv3487c	narH,mymA,adhD,fadD13,lipF
GO Process	GO:0043648	Dicarboxylic acid metabolic process	8	50	0.68	0.0237	83332.Rv0070c,83332.Rv0118c,83332.Rv1187,83332.Rv2332,83332.Rv3075c,83332.Rv3432c,83332.Rv3858c,83332.Rv3859c	glyA2,oxcA,rocA,mez,Rv3075c,gadB,gltD,gltB
GO Process	GO:0001666	Response to hypoxia	8	57	0.62	0.0428	83332.Rv0503c,83332.Rv0560c,83332.Rv2027c,83332.Rv2258c,83332.Rv2503c,83332.Rv2780,83332.Rv3734c,83332.Rv3866	cmaA2,Rv0560c,dosT,Rv2258c,scoB,ald,tgs2,espG1
GO Process	GO:0036293	Response to decreased oxygen levels	10	60	0.7	0.005	83332.Rv0503c,83332.Rv0560c,83332.Rv1161,83332.Rv1162,83332.Rv2027c,83332.Rv2258c,83332.Rv2503c,83332.Rv2780,83332.Rv3734c,83332.Rv3866	cmaA2,Rv0560c,narG,narH,dosT,Rv2258c,scoB,ald,tgs2,espG1
GO Process	GO:0044272	Sulfur compound biosynthetic process	10	72	0.62	0.0145	83332.Rv0391,83332.Rv1133c,83332.Rv1286,83332.Rv1336,83332.Rv1589,83332.Rv2977c,83332.Rv3206c,83332.Rv3340,83332.Rv3824c,83332.Rv3826	metZ,metE,cysN,cysM,bioB,thiL,moeB1,metC,papA1,fadD23
GO Process	GO:0046395	Carboxylic acid catabolic process	10	84	0.55	0.0375	83332.Rv0070c,83332.Rv0118c,83332.Rv0673,83332.Rv0753c,83332.Rv1187,83332.Rv1472,83332.Rv1844c,83332.Rv2780,83332.Rv3432c,83332.Rv3546	glyA2,oxcA,echA4,mmsA,rocA,echA12,gnd1,ald,gadB,fadA5
GO Process	GO:0006633	Fatty acid biosynthetic process	17	93	0.74	6.34e-06	83332.Rv0035,83332.Rv0216,83332.Rv0503c,83332.Rv1013,83332.Rv1094,83332.Rv1181,83332.Rv1527c,83332.Rv1661,83332.Rv2048c,83332.Rv2243,83332.Rv2245,83332.Rv2590,83332.Rv2947c,83332.Rv3089,83332.Rv3515c,83332.Rv3825c,83332.Rv3826	fadD34,Rv0216,cmaA2,pks16,desA2,pks4,pks5,pks7,pks12,fabD,kasA,fadD9,pks15,fadD13,fadD19,pks2,fadD23
GO Process	GO:1901607	Alpha-amino acid biosynthetic process	12	96	0.57	0.0099	83332.Rv0070c,83332.Rv0391,83332.Rv1133c,83332.Rv1336,83332.Rv1657,83332.Rv1820,83332.Rv2988c,83332.Rv3003c,83332.Rv3206c,83332.Rv3340,83332.Rv3858c,83332.Rv3859c	glyA2,metZ,metE,cysM,argR,ilvG,leuC,ilvB1,moeB1,metC,gltD,gltB
GO Process	GO:0009628	Response to abiotic stimulus	15	97	0.66	0.00022	83332.Rv0503c,83332.Rv0560c,83332.Rv1161,83332.Rv1162,83332.Rv2027c,83332.Rv2258c,83332.Rv2503c,83332.Rv2737c,83332.Rv2780,83332.Rv3083,83332.Rv3086,83332.Rv3089,83332.Rv3487c,83332.Rv3734c,83332.Rv3866	cmaA2,Rv0560c,narG,narH,dosT,Rv2258c,scoB,recA,ald,mymA,adhD,fadD13,lipF,tgs2,espG1
GO Process	GO:0007154	Cell communication	13	100	0.59	0.0046	83332.Rv0560c,83332.Rv0758,83332.Rv1032c,83332.Rv1033c,83332.Rv1286,83332.Rv1320c,83332.Rv1633,83332.Rv2027c,83332.Rv2737c,83332.Rv2984,83332.Rv3132c,83332.Rv3246c,83332.Rv3825c	Rv0560c,phoR,trcS,trcR,cysN,Rv1320c,uvrB,dosT,recA,ppk1,devS,mtrA,pks2
GO Process	GO:0006790	Sulfur compound metabolic process	13	102	0.58	0.005	83332.Rv0391,83332.Rv0503c,83332.Rv1133c,83332.Rv1286,83332.Rv1336,83332.Rv1465,83332.Rv1589,83332.Rv2855,83332.Rv2977c,83332.Rv3206c,83332.Rv3340,83332.Rv3824c,83332.Rv3826	metZ,cmaA2,metE,cysN,cysM,Rv1465,bioB,mtr,thiL,moeB1,metC,papA1,fadD23
GO Process	GO:0072330	Monocarboxylic acid biosynthetic process	18	108	0.7	8.3e-06	83332.Rv0035,83332.Rv0216,83332.Rv0503c,83332.Rv1013,83332.Rv1094,83332.Rv1181,83332.Rv1527c,83332.Rv1589,83332.Rv1661,83332.Rv2048c,83332.Rv2243,83332.Rv2245,83332.Rv2590,83332.Rv2947c,83332.Rv3089,83332.Rv3515c,83332.Rv3825c,83332.Rv3826	fadD34,Rv0216,cmaA2,pks16,desA2,pks4,pks5,bioB,pks7,pks12,fabD,kasA,fadD9,pks15,fadD13,fadD19,pks2,fadD23
GO Process	GO:0008652	Cellular amino acid biosynthetic process	13	115	0.53	0.0125	83332.Rv0070c,83332.Rv0391,83332.Rv1133c,83332.Rv1336,83332.Rv1600,83332.Rv1657,83332.Rv1820,83332.Rv2988c,83332.Rv3003c,83332.Rv3206c,83332.Rv3340,83332.Rv3858c,83332.Rv3859c	glyA2,metZ,metE,cysM,hisC1,argR,ilvG,leuC,ilvB1,moeB1,metC,gltD,gltB
GO Process	GO:0044282	Small molecule catabolic process	13	136	0.45	0.0401	83332.Rv0070c,83332.Rv0118c,83332.Rv0673,83332.Rv0753c,83332.Rv1187,83332.Rv1472,83332.Rv1844c,83332.Rv2780,83332.Rv3086,83332.Rv3432c,83332.Rv3540c,83332.Rv3545c,83332.Rv3546	glyA2,oxcA,echA4,mmsA,rocA,echA12,gnd1,ald,adhD,gadB,ltp2,cyp125,fadA5
GO Process	GO:1901605	Alpha-amino acid metabolic process	17	139	0.56	0.00072	83332.Rv0070c,83332.Rv0391,83332.Rv0753c,83332.Rv1133c,83332.Rv1187,83332.Rv1336,83332.Rv1657,83332.Rv1699,83332.Rv1820,83332.Rv2780,83332.Rv2988c,83332.Rv3003c,83332.Rv3206c,83332.Rv3340,83332.Rv3432c,83332.Rv3858c,83332.Rv3859c	glyA2,metZ,mmsA,metE,rocA,cysM,argR,pyrG,ilvG,ald,leuC,ilvB1,moeB1,metC,gadB,gltD,gltB
GO Process	GO:0006631	Fatty acid metabolic process	22	159	0.62	6.28e-06	83332.Rv0035,83332.Rv0118c,83332.Rv0216,83332.Rv0503c,83332.Rv0673,83332.Rv1013,83332.Rv1094,83332.Rv1181,83332.Rv1472,83332.Rv1527c,83332.Rv1661,83332.Rv2048c,83332.Rv2243,83332.Rv2245,83332.Rv2486,83332.Rv2590,83332.Rv2947c,83332.Rv3089,83332.Rv3515c,83332.Rv3546,83332.Rv3825c,83332.Rv3826	fadD34,oxcA,Rv0216,cmaA2,echA4,pks16,desA2,pks4,echA12,pks5,pks7,pks12,fabD,kasA,echA14,fadD9,pks15,fadD13,fadD19,fadA5,pks2,fadD23
GO Process	GO:0006520	Cellular amino acid metabolic process	19	189	0.48	0.0026	83332.Rv0070c,83332.Rv0391,83332.Rv0753c,83332.Rv1133c,83332.Rv1187,83332.Rv1336,83332.Rv1600,83332.Rv1657,83332.Rv1699,83332.Rv1820,83332.Rv2379c,83332.Rv2780,83332.Rv2988c,83332.Rv3003c,83332.Rv3206c,83332.Rv3340,83332.Rv3432c,83332.Rv3858c,83332.Rv3859c	glyA2,metZ,mmsA,metE,rocA,cysM,hisC1,argR,pyrG,ilvG,mbtF,ald,leuC,ilvB1,moeB1,metC,gadB,gltD,gltB
GO Process	GO:0008610	Lipid biosynthetic process	22	214	0.49	0.00046	83332.Rv0035,83332.Rv0216,83332.Rv0503c,83332.Rv1013,83332.Rv1094,83332.Rv1110,83332.Rv1181,83332.Rv1527c,83332.Rv1661,83332.Rv2048c,83332.Rv2243,83332.Rv2245,83332.Rv2379c,83332.Rv2590,83332.Rv2870c,83332.Rv2947c,83332.Rv3089,83332.Rv3515c,83332.Rv3734c,83332.Rv3824c,83332.Rv3825c,83332.Rv3826	fadD34,Rv0216,cmaA2,pks16,desA2,lytB2,pks4,pks5,pks7,pks12,fabD,kasA,mbtF,fadD9,dxr,pks15,fadD13,fadD19,tgs2,papA1,pks2,fadD23
GO Process	GO:0051716	Cellular response to stimulus	19	222	0.41	0.0131	83332.Rv0560c,83332.Rv0758,83332.Rv0888,83332.Rv1032c,83332.Rv1033c,83332.Rv1161,83332.Rv1162,83332.Rv1286,83332.Rv1320c,83332.Rv1633,83332.Rv2027c,83332.Rv2258c,83332.Rv2737c,83332.Rv2984,83332.Rv3086,83332.Rv3132c,83332.Rv3246c,83332.Rv3546,83332.Rv3825c	Rv0560c,phoR,spmT,trcS,trcR,narG,narH,cysN,Rv1320c,uvrB,dosT,Rv2258c,recA,ppk1,adhD,devS,mtrA,fadA5,pks2
GO Process	GO:0032787	Monocarboxylic acid metabolic process	28	225	0.57	7.23e-07	83332.Rv0035,83332.Rv0118c,83332.Rv0216,83332.Rv0503c,83332.Rv0673,83332.Rv1013,83332.Rv1094,83332.Rv1110,83332.Rv1181,83332.Rv1472,83332.Rv1527c,83332.Rv1589,83332.Rv1661,83332.Rv1844c,83332.Rv2048c,83332.Rv2243,83332.Rv2245,83332.Rv2332,83332.Rv2486,83332.Rv2590,83332.Rv2870c,83332.Rv2947c,83332.Rv3089,83332.Rv3262,83332.Rv3515c,83332.Rv3546,83332.Rv3825c,83332.Rv3826	fadD34,oxcA,Rv0216,cmaA2,echA4,pks16,desA2,lytB2,pks4,echA12,pks5,bioB,pks7,gnd1,pks12,fabD,kasA,mez,echA14,fadD9,dxr,pks15,fadD13,fbiB,fadD19,fadA5,pks2,fadD23
GO Process	GO:0046394	Carboxylic acid biosynthetic process	33	231	0.63	1.34e-09	83332.Rv0035,83332.Rv0070c,83332.Rv0216,83332.Rv0391,83332.Rv0503c,83332.Rv1013,83332.Rv1094,83332.Rv1133c,83332.Rv1173,83332.Rv1181,83332.Rv1336,83332.Rv1527c,83332.Rv1589,83332.Rv1600,83332.Rv1657,83332.Rv1661,83332.Rv1820,83332.Rv2048c,83332.Rv2243,83332.Rv2245,83332.Rv2590,83332.Rv2947c,83332.Rv2988c,83332.Rv3003c,83332.Rv3089,83332.Rv3206c,83332.Rv3262,83332.Rv3340,83332.Rv3515c,83332.Rv3825…	fadD34,glyA2,Rv0216,metZ,cmaA2,pks16,desA2,metE,fbiC,pks4,cysM,pks5,bioB,hisC1,argR,pks7,ilvG,pks12,fabD,kasA,fadD9,pks15,leuC,ilvB1,fadD13,moeB1,fbiB,metC,fadD19,pks2,fadD23,gltD,gltB
GO Process	GO:1901575	Organic substance catabolic process	20	267	0.35	0.0375	83332.Rv0062,83332.Rv0070c,83332.Rv0118c,83332.Rv0673,83332.Rv0753c,83332.Rv0888,83332.Rv1187,83332.Rv1472,83332.Rv1755c,83332.Rv1844c,83332.Rv2002,83332.Rv2780,83332.Rv3086,83332.Rv3199c,83332.Rv3332,83332.Rv3432c,83332.Rv3479,83332.Rv3540c,83332.Rv3545c,83332.Rv3546	celA1,glyA2,oxcA,echA4,mmsA,spmT,rocA,echA12,plcD,gnd1,fabG3,ald,adhD,nudC,nagA,gadB,Rv3479,ltp2,cyp125,fadA5
GO Process	GO:0051701	Biological process involved in interaction with host	20	270	0.34	0.0401	83332.Rv0146,83332.Rv0503c,83332.Rv1196,83332.Rv1633,83332.Rv1755c,83332.Rv2082,83332.Rv2349c,83332.Rv2350c,83332.Rv2351c,83332.Rv3083,83332.Rv3086,83332.Rv3089,83332.Rv3206c,83332.Rv3237c,83332.Rv3246c,83332.Rv3478,83332.Rv3487c,83332.Rv3515c,83332.Rv3545c,83332.Rv3615c	Rv0146,cmaA2,PPE18,uvrB,plcD,Rv2082,plcC,plcB,plcA,mymA,adhD,fadD13,moeB1,Rv3237c,mtrA,PPE60,lipF,fadD19,cyp125,espC
GO Process	GO:0044255	Cellular lipid metabolic process	27	274	0.47	7.55e-05	83332.Rv0035,83332.Rv0118c,83332.Rv0216,83332.Rv0503c,83332.Rv0673,83332.Rv0888,83332.Rv1013,83332.Rv1094,83332.Rv1110,83332.Rv1181,83332.Rv1472,83332.Rv1527c,83332.Rv1661,83332.Rv2048c,83332.Rv2243,83332.Rv2245,83332.Rv2486,83332.Rv2590,83332.Rv2870c,83332.Rv2947c,83332.Rv3089,83332.Rv3515c,83332.Rv3546,83332.Rv3734c,83332.Rv3824c,83332.Rv3825c,83332.Rv3826	fadD34,oxcA,Rv0216,cmaA2,echA4,spmT,pks16,desA2,lytB2,pks4,echA12,pks5,pks7,pks12,fabD,kasA,echA14,fadD9,dxr,pks15,fadD13,fadD19,fadA5,tgs2,papA1,pks2,fadD23
GO Process	GO:0009056	Catabolic process	22	275	0.38	0.0106	83332.Rv0062,83332.Rv0070c,83332.Rv0118c,83332.Rv0673,83332.Rv0753c,83332.Rv0888,83332.Rv1161,83332.Rv1187,83332.Rv1399c,83332.Rv1472,83332.Rv1755c,83332.Rv1844c,83332.Rv2002,83332.Rv2780,83332.Rv3086,83332.Rv3199c,83332.Rv3332,83332.Rv3432c,83332.Rv3479,83332.Rv3540c,83332.Rv3545c,83332.Rv3546	celA1,glyA2,oxcA,echA4,mmsA,spmT,narG,rocA,nlhH,echA12,plcD,gnd1,fabG3,ald,adhD,nudC,nagA,gadB,Rv3479,ltp2,cyp125,fadA5
GO Process	GO:0044419	Biological process involved in interspecies interaction between organisms	21	287	0.34	0.0374	83332.Rv0146,83332.Rv0503c,83332.Rv0888,83332.Rv1196,83332.Rv1633,83332.Rv1755c,83332.Rv2082,83332.Rv2349c,83332.Rv2350c,83332.Rv2351c,83332.Rv3083,83332.Rv3086,83332.Rv3089,83332.Rv3206c,83332.Rv3237c,83332.Rv3246c,83332.Rv3478,83332.Rv3487c,83332.Rv3515c,83332.Rv3545c,83332.Rv3615c	Rv0146,cmaA2,spmT,PPE18,uvrB,plcD,Rv2082,plcC,plcB,plcA,mymA,adhD,fadD13,moeB1,Rv3237c,mtrA,PPE60,lipF,fadD19,cyp125,espC
GO Process	GO:0044283	Small molecule biosynthetic process	37	303	0.56	2.81e-09	83332.Rv0035,83332.Rv0069c,83332.Rv0070c,83332.Rv0216,83332.Rv0391,83332.Rv0503c,83332.Rv0555,83332.Rv1013,83332.Rv1094,83332.Rv1133c,83332.Rv1173,83332.Rv1181,83332.Rv1336,83332.Rv1527c,83332.Rv1589,83332.Rv1600,83332.Rv1657,83332.Rv1661,83332.Rv1820,83332.Rv2048c,83332.Rv2062c,83332.Rv2243,83332.Rv2245,83332.Rv2590,83332.Rv2947c,83332.Rv2977c,83332.Rv2988c,83332.Rv3003c,83332.Rv3089,83332.Rv320…	fadD34,sdaA,glyA2,Rv0216,metZ,cmaA2,menD,pks16,desA2,metE,fbiC,pks4,cysM,pks5,bioB,hisC1,argR,pks7,ilvG,pks12,cobN,fabD,kasA,fadD9,pks15,thiL,leuC,ilvB1,fadD13,moeB1,fbiB,metC,fadD19,pks2,fadD23,gltD,gltB
GO Process	GO:0006796	Phosphate-containing compound metabolic process	23	312	0.34	0.0203	83332.Rv0001,83332.Rv0758,83332.Rv0772,83332.Rv0888,83332.Rv1032c,83332.Rv1110,83332.Rv1173,83332.Rv1286,83332.Rv1320c,83332.Rv1447c,83332.Rv1699,83332.Rv1844c,83332.Rv2027c,83332.Rv2870c,83332.Rv2977c,83332.Rv2984,83332.Rv3119,83332.Rv3132c,83332.Rv3168,83332.Rv3199c,83332.Rv3246c,83332.Rv3262,83332.Rv3705c	dnaA,phoR,purD,spmT,trcS,lytB2,fbiC,cysN,Rv1320c,zwf2,pyrG,gnd1,dosT,dxr,thiL,ppk1,moaE1,devS,Rv3168,nudC,mtrA,fbiB,Rv3705c
GO Process	GO:0006793	Phosphorus metabolic process	24	321	0.35	0.0131	83332.Rv0001,83332.Rv0758,83332.Rv0772,83332.Rv0888,83332.Rv1032c,83332.Rv1110,83332.Rv1173,83332.Rv1286,83332.Rv1320c,83332.Rv1447c,83332.Rv1699,83332.Rv1844c,83332.Rv2027c,83332.Rv2870c,83332.Rv2977c,83332.Rv2984,83332.Rv3119,83332.Rv3132c,83332.Rv3168,83332.Rv3199c,83332.Rv3246c,83332.Rv3262,83332.Rv3441c,83332.Rv3705c	dnaA,phoR,purD,spmT,trcS,lytB2,fbiC,cysN,Rv1320c,zwf2,pyrG,gnd1,dosT,dxr,thiL,ppk1,moaE1,devS,Rv3168,nudC,mtrA,fbiB,mrsA,Rv3705c
GO Process	GO:0006629	Lipid metabolic process	34	355	0.46	5.05e-06	83332.Rv0035,83332.Rv0118c,83332.Rv0216,83332.Rv0503c,83332.Rv0673,83332.Rv0888,83332.Rv1013,83332.Rv1094,83332.Rv1110,83332.Rv1181,83332.Rv1472,83332.Rv1527c,83332.Rv1661,83332.Rv1755c,83332.Rv2002,83332.Rv2048c,83332.Rv2243,83332.Rv2245,83332.Rv2379c,83332.Rv2486,83332.Rv2590,83332.Rv2870c,83332.Rv2947c,83332.Rv3059,83332.Rv3089,83332.Rv3479,83332.Rv3515c,83332.Rv3540c,83332.Rv3545c,83332.Rv354…	fadD34,oxcA,Rv0216,cmaA2,echA4,spmT,pks16,desA2,lytB2,pks4,echA12,pks5,pks7,plcD,fabG3,pks12,fabD,kasA,mbtF,echA14,fadD9,dxr,pks15,cyp136,fadD13,Rv3479,fadD19,ltp2,cyp125,fadA5,tgs2,papA1,pks2,fadD23
GO Process	GO:0019752	Carboxylic acid metabolic process	49	420	0.54	2.9e-12	83332.Rv0035,83332.Rv0070c,83332.Rv0118c,83332.Rv0216,83332.Rv0391,83332.Rv0503c,83332.Rv0673,83332.Rv0753c,83332.Rv1013,83332.Rv1094,83332.Rv1110,83332.Rv1133c,83332.Rv1173,83332.Rv1181,83332.Rv1187,83332.Rv1336,83332.Rv1472,83332.Rv1527c,83332.Rv1589,83332.Rv1600,83332.Rv1657,83332.Rv1661,83332.Rv1699,83332.Rv1820,83332.Rv1844c,83332.Rv2048c,83332.Rv2243,83332.Rv2245,83332.Rv2332,83332.Rv2379c,…	fadD34,glyA2,oxcA,Rv0216,metZ,cmaA2,echA4,mmsA,pks16,desA2,lytB2,metE,fbiC,pks4,rocA,cysM,echA12,pks5,bioB,hisC1,argR,pks7,pyrG,ilvG,gnd1,pks12,fabD,kasA,mez,mbtF,echA14,fadD9,ald,dxr,pks15,leuC,ilvB1,Rv3075c,fadD13,moeB1,fbiB,metC,gadB,fadD19,fadA5,pks2,fadD23,gltD,gltB
GO Process	GO:0043436	Oxoacid metabolic process	52	435	0.55	1.82e-13	83332.Rv0035,83332.Rv0070c,83332.Rv0118c,83332.Rv0216,83332.Rv0391,83332.Rv0503c,83332.Rv0673,83332.Rv0753c,83332.Rv1013,83332.Rv1094,83332.Rv1110,83332.Rv1133c,83332.Rv1161,83332.Rv1162,83332.Rv1173,83332.Rv1181,83332.Rv1187,83332.Rv1336,83332.Rv1472,83332.Rv1527c,83332.Rv1589,83332.Rv1600,83332.Rv1657,83332.Rv1661,83332.Rv1699,83332.Rv1820,83332.Rv1844c,83332.Rv2048c,83332.Rv2243,83332.Rv2245,8…	fadD34,glyA2,oxcA,Rv0216,metZ,cmaA2,echA4,mmsA,pks16,desA2,lytB2,metE,narG,narH,fbiC,pks4,rocA,cysM,echA12,pks5,bioB,hisC1,argR,pks7,pyrG,ilvG,gnd1,pks12,fabD,kasA,mez,mbtF,echA14,fadD9,ald,dxr,pks15,ppk1,leuC,ilvB1,Rv3075c,fadD13,moeB1,fbiB,metC,gadB,fadD19,fadA5,pks2,fadD23,gltD,gltB
GO Process	GO:0050896	Response to stimulus	39	558	0.32	0.0006	83332.Rv0146,83332.Rv0503c,83332.Rv0560c,83332.Rv0758,83332.Rv0888,83332.Rv1032c,83332.Rv1033c,83332.Rv1161,83332.Rv1162,83332.Rv1173,83332.Rv1196,83332.Rv1218c,83332.Rv1286,83332.Rv1320c,83332.Rv1633,83332.Rv2027c,83332.Rv2082,83332.Rv2258c,83332.Rv2503c,83332.Rv2737c,83332.Rv2780,83332.Rv2984,83332.Rv3083,83332.Rv3086,83332.Rv3089,83332.Rv3132c,83332.Rv3168,83332.Rv3206c,83332.Rv3237c,83332.Rv3…	Rv0146,cmaA2,Rv0560c,phoR,spmT,trcS,trcR,narG,narH,fbiC,PPE18,Rv1218c,cysN,Rv1320c,uvrB,dosT,Rv2082,Rv2258c,scoB,recA,ald,ppk1,mymA,adhD,fadD13,devS,Rv3168,moeB1,Rv3237c,mtrA,PPE60,lipF,fadD19,fadA5,espC,ephA,tgs2,pks2,espG1
GO Process	GO:1901564	Organonitrogen compound metabolic process	41	661	0.27	0.0046	83332.Rv0001,83332.Rv0070c,83332.Rv0391,83332.Rv0753c,83332.Rv0758,83332.Rv0772,83332.Rv0888,83332.Rv1032c,83332.Rv1133c,83332.Rv1173,83332.Rv1187,83332.Rv1205,83332.Rv1320c,83332.Rv1336,83332.Rv1589,83332.Rv1600,83332.Rv1657,83332.Rv1699,83332.Rv1820,83332.Rv2027c,83332.Rv2062c,83332.Rv2379c,83332.Rv2737c,83332.Rv2780,83332.Rv2977c,83332.Rv2984,83332.Rv2988c,83332.Rv3003c,83332.Rv3119,83332.Rv31…	dnaA,glyA2,metZ,mmsA,phoR,purD,spmT,trcS,metE,fbiC,rocA,log,Rv1320c,cysM,bioB,hisC1,argR,pyrG,ilvG,dosT,cobN,mbtF,recA,ald,thiL,ppk1,leuC,ilvB1,moaE1,devS,nudC,moeB1,Rv3207c,mtrA,fbiB,dacB1,metC,gadB,mrsA,gltD,gltB
GO Process	GO:0044281	Small molecule metabolic process	66	682	0.46	6.84e-14	83332.Rv0001,83332.Rv0035,83332.Rv0069c,83332.Rv0070c,83332.Rv0118c,83332.Rv0216,83332.Rv0391,83332.Rv0503c,83332.Rv0555,83332.Rv0673,83332.Rv0753c,83332.Rv0772,83332.Rv1013,83332.Rv1094,83332.Rv1110,83332.Rv1133c,83332.Rv1161,83332.Rv1162,83332.Rv1173,83332.Rv1181,83332.Rv1187,83332.Rv1320c,83332.Rv1336,83332.Rv1447c,83332.Rv1472,83332.Rv1527c,83332.Rv1589,83332.Rv1600,83332.Rv1657,83332.Rv1661,…	dnaA,fadD34,sdaA,glyA2,oxcA,Rv0216,metZ,cmaA2,menD,echA4,mmsA,purD,pks16,desA2,lytB2,metE,narG,narH,fbiC,pks4,rocA,Rv1320c,cysM,zwf2,echA12,pks5,bioB,hisC1,argR,pks7,pyrG,ilvG,gnd1,pks12,cobN,fabD,kasA,mez,mbtF,echA14,fadD9,ald,dxr,pks15,thiL,ppk1,leuC,ilvB1,Rv3075c,adhD,fadD13,nudC,moeB1,fbiB,metC,gadB,mrsA,fadD19,ltp2,cyp125,fadA5,tgs2,pks2,fadD23,gltD,gltB
GO Process	GO:0044249	Cellular biosynthetic process	53	741	0.33	3.72e-06	83332.Rv0001,83332.Rv0035,83332.Rv0070c,83332.Rv0216,83332.Rv0391,83332.Rv0503c,83332.Rv0555,83332.Rv0772,83332.Rv1013,83332.Rv1094,83332.Rv1110,83332.Rv1133c,83332.Rv1173,83332.Rv1181,83332.Rv1205,83332.Rv1286,83332.Rv1297,83332.Rv1320c,83332.Rv1336,83332.Rv1527c,83332.Rv1589,83332.Rv1600,83332.Rv1657,83332.Rv1661,83332.Rv1699,83332.Rv1820,83332.Rv2048c,83332.Rv2062c,83332.Rv2243,83332.Rv2245,83…	dnaA,fadD34,glyA2,Rv0216,metZ,cmaA2,menD,purD,pks16,desA2,lytB2,metE,fbiC,pks4,log,cysN,rho,Rv1320c,cysM,pks5,bioB,hisC1,argR,pks7,pyrG,ilvG,pks12,cobN,fabD,kasA,mbtF,fadD9,dxr,pks15,thiL,ppk1,leuC,ilvB1,fadD13,moaE1,moeB1,fbiB,dacB1,metC,mrsA,fadD19,tgs2,Rv3788,papA1,pks2,fadD23,gltD,gltB
GO Process	GO:1901576	Organic substance biosynthetic process	51	763	0.3	4.73e-05	83332.Rv0001,83332.Rv0035,83332.Rv0069c,83332.Rv0070c,83332.Rv0216,83332.Rv0391,83332.Rv0503c,83332.Rv0555,83332.Rv0772,83332.Rv1013,83332.Rv1094,83332.Rv1110,83332.Rv1133c,83332.Rv1173,83332.Rv1181,83332.Rv1297,83332.Rv1320c,83332.Rv1336,83332.Rv1527c,83332.Rv1589,83332.Rv1600,83332.Rv1657,83332.Rv1661,83332.Rv1699,83332.Rv1820,83332.Rv2048c,83332.Rv2062c,83332.Rv2243,83332.Rv2245,83332.Rv2379c,…	dnaA,fadD34,sdaA,glyA2,Rv0216,metZ,cmaA2,menD,purD,pks16,desA2,lytB2,metE,fbiC,pks4,rho,Rv1320c,cysM,pks5,bioB,hisC1,argR,pks7,pyrG,ilvG,pks12,cobN,fabD,kasA,mbtF,fadD9,dxr,pks15,thiL,leuC,ilvB1,fadD13,moaE1,moeB1,fbiB,dacB1,metC,mrsA,fadD19,tgs2,Rv3788,papA1,pks2,fadD23,gltD,gltB
GO Process	GO:0009058	Biosynthetic process	54	779	0.32	6.28e-06	83332.Rv0001,83332.Rv0035,83332.Rv0069c,83332.Rv0070c,83332.Rv0216,83332.Rv0391,83332.Rv0503c,83332.Rv0555,83332.Rv0772,83332.Rv1013,83332.Rv1094,83332.Rv1110,83332.Rv1133c,83332.Rv1173,83332.Rv1181,83332.Rv1205,83332.Rv1286,83332.Rv1297,83332.Rv1320c,83332.Rv1336,83332.Rv1527c,83332.Rv1589,83332.Rv1600,83332.Rv1657,83332.Rv1661,83332.Rv1699,83332.Rv1820,83332.Rv2048c,83332.Rv2062c,83332.Rv2243,8…	dnaA,fadD34,sdaA,glyA2,Rv0216,metZ,cmaA2,menD,purD,pks16,desA2,lytB2,metE,fbiC,pks4,log,cysN,rho,Rv1320c,cysM,pks5,bioB,hisC1,argR,pks7,pyrG,ilvG,pks12,cobN,fabD,kasA,mbtF,fadD9,dxr,pks15,thiL,ppk1,leuC,ilvB1,fadD13,moaE1,moeB1,fbiB,dacB1,metC,mrsA,fadD19,tgs2,Rv3788,papA1,pks2,fadD23,gltD,gltB
GO Process	GO:0044238	Primary metabolic process	80	1342	0.25	2.2e-07	83332.Rv0001,83332.Rv0035,83332.Rv0062,83332.Rv0069c,83332.Rv0070c,83332.Rv0118c,83332.Rv0216,83332.Rv0391,83332.Rv0503c,83332.Rv0673,83332.Rv0753c,83332.Rv0758,83332.Rv0772,83332.Rv0888,83332.Rv1013,83332.Rv1032c,83332.Rv1094,83332.Rv1110,83332.Rv1133c,83332.Rv1181,83332.Rv1187,83332.Rv1297,83332.Rv1320c,83332.Rv1336,83332.Rv1447c,83332.Rv1472,83332.Rv1527c,83332.Rv1600,83332.Rv1633,83332.Rv1657…	dnaA,fadD34,celA1,sdaA,glyA2,oxcA,Rv0216,metZ,cmaA2,echA4,mmsA,phoR,purD,spmT,pks16,trcS,desA2,lytB2,metE,pks4,rocA,rho,Rv1320c,cysM,zwf2,echA12,pks5,hisC1,uvrB,argR,pks7,pyrG,plcD,ilvG,gnd1,fabG3,dosT,pks12,fabD,kasA,moeW,mbtF,echA14,fadD9,Rv2681,recA,ald,dxr,pks15,ppk1,leuC,ilvB1,Rv3030,cyp136,fadD13,moaE1,devS,nudC,moeB1,Rv3207c,hpf,mtrA,fbiB,dacB1,nagA,metC,gadB,mrsA,Rv3479,fadD19,ltp2,cyp125…
GO Process	GO:0044237	Cellular metabolic process	86	1411	0.26	5.71e-09	83332.Rv0001,83332.Rv0035,83332.Rv0062,83332.Rv0070c,83332.Rv0118c,83332.Rv0216,83332.Rv0391,83332.Rv0503c,83332.Rv0555,83332.Rv0673,83332.Rv0753c,83332.Rv0758,83332.Rv0772,83332.Rv0888,83332.Rv1013,83332.Rv1032c,83332.Rv1094,83332.Rv1110,83332.Rv1133c,83332.Rv1161,83332.Rv1162,83332.Rv1173,83332.Rv1181,83332.Rv1187,83332.Rv1205,83332.Rv1286,83332.Rv1297,83332.Rv1320c,83332.Rv1336,83332.Rv1447c,8…	dnaA,fadD34,celA1,glyA2,oxcA,Rv0216,metZ,cmaA2,menD,echA4,mmsA,phoR,purD,spmT,pks16,trcS,desA2,lytB2,metE,narG,narH,fbiC,pks4,rocA,log,cysN,rho,Rv1320c,cysM,zwf2,Rv1465,echA12,pks5,bioB,hisC1,uvrB,argR,pks7,pyrG,ilvG,gnd1,dosT,pks12,cobN,fabD,kasA,mez,moeW,mbtF,echA14,fadD9,Rv2681,recA,ald,mtr,dxr,pks15,thiL,ppk1,leuC,ilvB1,Rv3030,Rv3075c,adhD,fadD13,moaE1,devS,Rv3168,nudC,moeB1,mtrA,fbiB,dacB1,m…
GO Process	GO:0071704	Organic substance metabolic process	93	1494	0.27	6.68e-11	83332.Rv0001,83332.Rv0035,83332.Rv0062,83332.Rv0069c,83332.Rv0070c,83332.Rv0118c,83332.Rv0216,83332.Rv0391,83332.Rv0503c,83332.Rv0555,83332.Rv0673,83332.Rv0753c,83332.Rv0758,83332.Rv0772,83332.Rv0888,83332.Rv1013,83332.Rv1032c,83332.Rv1094,83332.Rv1110,83332.Rv1133c,83332.Rv1161,83332.Rv1162,83332.Rv1173,83332.Rv1181,83332.Rv1187,83332.Rv1205,83332.Rv1297,83332.Rv1320c,83332.Rv1336,83332.Rv1447c,…	dnaA,fadD34,celA1,sdaA,glyA2,oxcA,Rv0216,metZ,cmaA2,menD,echA4,mmsA,phoR,purD,spmT,pks16,trcS,desA2,lytB2,metE,narG,narH,fbiC,pks4,rocA,log,rho,Rv1320c,cysM,zwf2,echA12,pks5,bioB,hisC1,uvrB,argR,pks7,pyrG,plcD,ilvG,gnd1,fabG3,dosT,pks12,cobN,fabD,kasA,mez,moeW,mbtF,echA14,fadD9,Rv2681,recA,ald,mtr,dxr,pks15,thiL,ppk1,leuC,ilvB1,Rv3030,cyp136,Rv3075c,adhD,fadD13,moaE1,devS,nudC,moeB1,Rv3207c,mtrA,…
GO Process	GO:0008152	Metabolic process	108	1630	0.3	6.45e-17	83332.Rv0001,83332.Rv0035,83332.Rv0062,83332.Rv0069c,83332.Rv0070c,83332.Rv0118c,83332.Rv0146,83332.Rv0216,83332.Rv0391,83332.Rv0503c,83332.Rv0555,83332.Rv0560c,83332.Rv0673,83332.Rv0726c,83332.Rv0753c,83332.Rv0758,83332.Rv0772,83332.Rv0830,83332.Rv0853c,83332.Rv0888,83332.Rv1013,83332.Rv1032c,83332.Rv1094,83332.Rv1110,83332.Rv1133c,83332.Rv1161,83332.Rv1162,83332.Rv1173,83332.Rv1181,83332.Rv1187…	dnaA,fadD34,celA1,sdaA,glyA2,oxcA,Rv0146,Rv0216,metZ,cmaA2,menD,Rv0560c,echA4,Rv0726c,mmsA,phoR,purD,Rv0830,pdc,spmT,pks16,trcS,desA2,lytB2,metE,narG,narH,fbiC,pks4,rocA,log,cysN,rho,Rv1320c,cysM,nlhH,zwf2,Rv1465,echA12,pks5,bioB,hisC1,uvrB,argR,pks7,pyrG,Rv1729c,plcD,ilvG,gnd1,fabG3,dosT,pks12,cobN,fabD,kasA,Rv2258c,mez,moeW,mbtF,echA14,fadD9,Rv2681,sthA,recA,ald,mtr,dxr,pks15,thiL,ppk1,leuC,ilv…
GO Process	GO:0009987	Cellular process	96	1738	0.22	1.93e-08	83332.Rv0001,83332.Rv0035,83332.Rv0062,83332.Rv0070c,83332.Rv0118c,83332.Rv0216,83332.Rv0391,83332.Rv0503c,83332.Rv0555,83332.Rv0560c,83332.Rv0673,83332.Rv0753c,83332.Rv0758,83332.Rv0772,83332.Rv0888,83332.Rv1013,83332.Rv1032c,83332.Rv1033c,83332.Rv1094,83332.Rv1110,83332.Rv1133c,83332.Rv1161,83332.Rv1162,83332.Rv1173,83332.Rv1181,83332.Rv1187,83332.Rv1205,83332.Rv1286,83332.Rv1297,83332.Rv1320c,…	dnaA,fadD34,celA1,glyA2,oxcA,Rv0216,metZ,cmaA2,menD,Rv0560c,echA4,mmsA,phoR,purD,spmT,pks16,trcS,trcR,desA2,lytB2,metE,narG,narH,fbiC,pks4,rocA,log,cysN,rho,Rv1320c,cysM,zwf2,Rv1465,echA12,pks5,bioB,hisC1,uvrB,argR,pks7,pyrG,ilvG,gnd1,dosT,pks12,cobN,fabD,kasA,Rv2258c,mez,moeW,era,mbtF,echA14,fadD9,Rv2681,sthA,recA,ald,mtr,dxr,pks15,thiL,ppk1,leuC,ilvB1,Rv3030,Rv3075c,adhD,fadD13,moaE1,devS,Rv316…

## Sheet: dCym_downregulated_Revigo
TermID	Name	Value	LogSize	Frequency	Uniqueness	Dispensability	PC_0	PC_1	Representative
GO:0006520	amino acid metabolic process	-2.58503	2.26245	8.14682	0.900975	0.12132	5.24649	3.26384	null
GO:0006536	glutamate metabolic process	-1.65956	0.954243	0.358102	0.710745	0.340495	-6.61996	-2.77613	null
GO:0006629	lipid metabolic process	-5.29671	2.57287	16.6965	0.884143	0.103773	4.28825	4.82771	null
GO:0006633	fatty acid biosynthetic process	-5.19791	1.94939	3.93912	0.582365	0	-6.46953	-0.0524519	null
GO:0006631	fatty acid metabolic process	-5.20204	2.18469	6.80394	0.57528	0.757147	null	null	6633
GO:0008610	lipid biosynthetic process	-3.33724	2.34635	9.89257	0.777281	0.667445	null	null	6633
GO:0008652	amino acid biosynthetic process	-1.90309	2.05308	5.01343	0.779382	0.801304	null	null	6633
GO:0019752	carboxylic acid metabolic process	-11.5376	2.56585	16.4279	0.58375	0.580959	null	null	6633
GO:0032787	monocarboxylic acid metabolic process	-6.14086	2.3075	9.04208	0.619384	0.695637	null	null	6633
GO:0043436	oxoacid metabolic process	-12.7399	2.5832	17.0994	0.582954	0.811478	null	null	6633
GO:0044255	cellular lipid metabolic process	-4.12205	2.41497	11.5936	0.758541	0.553396	null	null	6633
GO:0046394	carboxylic acid biosynthetic process	-8.8729	2.35984	10.2059	0.565652	0.767552	null	null	6633
GO:0072330	monocarboxylic acid biosynthetic process	-5.08092	2.01284	4.5658	0.605761	0.691678	null	null	6633
GO:1901605	alpha-amino acid metabolic process	-3.14267	2.15534	6.35631	0.588102	0.792408	null	null	6633
GO:1901607	alpha-amino acid biosynthetic process	-2.00436	2.02531	4.70009	0.570014	0.651414	null	null	6633
GO:0006790	sulfur compound metabolic process	-2.30103	1.97772	4.2077	0.859891	0.118292	-5.35545	6.04077	null
GO:0006793	phosphorus metabolic process	-1.88273	2.48144	13.5184	0.824656	0.146509	-6.57983	4.12934	null
GO:0006796	phosphate-containing compound metabolic process	-1.6925	2.46538	13.026	0.826047	0.187495	-5.12431	3.90505	null
GO:0007154	cell communication	-2.33724	1.76343	2.55148	0.958217	0.0386143	5.89788	1.0759	null
GO:0008152	metabolic process	-16.1904	3.17522	66.9651	1	0	-5.12393	-6.22452	null
GO:0009056	catabolic process	-1.97469	2.42651	11.9069	0.91426	0.0787893	5.7384	-1.12142	null
GO:0009058	biosynthetic process	-5.20204	2.94151	39.0779	0.881099	0.158631	-1.62155	7.34148	null
GO:0009628	response to abiotic stimulus	-3.65758	1.98677	4.29722	0.941954	0	-1.61804	-5.95026	null
GO:0009987	cellular process	-7.71444	3.17464	66.8756	1	0	4.98723	-3.11353	null
GO:0036293	response to decreased oxygen levels	-2.30103	1.78533	2.68577	0.891246	0.297428	-0.829125	-6.35138	null
GO:0001666	response to hypoxia	-1.36856	1.77085	2.59624	0.891529	0.95894	null	null	36293
GO:0010447	response to acidic pH	-1.6517	1.20412	0.671441	0.908715	0.698773	null	null	36293
GO:0043648	dicarboxylic acid metabolic process	-1.62525	1.6902	2.14861	0.693655	0.426731	-6.28443	-1.62091	null
GO:0044237	cellular metabolic process	-8.24336	3.03222	48.1647	0.86544	0.134821	-0.137588	6.8174	null
GO:0044238	primary metabolic process	-6.65758	3.09447	55.5953	0.866215	0.201075	-0.312371	5.6436	null
GO:0044249	cellular biosynthetic process	-5.42946	2.83251	30.3939	0.736778	0.357543	-5.17054	2.49323	null
GO:0044272	sulfur compound biosynthetic process	-1.83863	1.86923	3.26768	0.816201	0.249112	-7.68027	2.14632	null
GO:0044281	small molecule metabolic process	-13.1649	2.81358	29.0958	0.891518	0.0592866	1.94499	6.80962	null
GO:0044283	small molecule biosynthetic process	-8.55129	2.47712	13.3841	0.701583	0.333771	-7.1813	-0.83152	null
GO:0044419	biological process involved in interspecies interaction between organisms	-1.42713	2.49415	13.9212	1	0	0.31501	-1.78054	null
GO:0046395	carboxylic acid catabolic process	-1.42597	1.90309	3.53626	0.658439	0.459062	-6.02832	-0.96352	null
GO:0044282	small molecule catabolic process	-1.39686	2.12057	5.86392	0.757934	0.606841	null	null	46395
GO:0050896	response to stimulus	-3.22185	2.76118	25.7833	1	0	2.63228	0.0901998	null
GO:0051701	biological process involved in interaction with host	-1.39686	2.46538	13.026	0.980299	0.405875	2.97275	-4.93246	null
GO:0051716	cellular response to stimulus	-1.88273	2.34044	9.75828	0.885383	0.367525	-1.56011	-6.54265	null
GO:0052008	symbiont-mediated disruption of host cellular anatomical entity	-2.30103	0.69897	0.179051	0.980299	0	2.80963	-5.38917	null
GO:1901564	organonitrogen compound metabolic process	-2.33724	2.82543	29.9015	0.890628	0.136721	0.817221	3.67747	null

## Sheet: dCym_upregulated_String
#category	term ID	term description	observed gene count	background gene count	strength	false discovery rate	matching proteins in your network (IDs)	matching proteins in your network (labels)
GO Process	GO:0009987	Cellular process	39	1738	0.28	6.11e-05	83332.Rv0019c,83332.Rv0237,83332.Rv0417,83332.Rv0491,83332.Rv0558,83332.Rv0724,83332.Rv1253,83332.Rv1653,83332.Rv1654,83332.Rv1655,83332.Rv1697,83332.Rv1854c,83332.Rv1856c,83332.Rv1980c,83332.Rv1984c,83332.Rv2225,83332.Rv2234,83332.Rv2249c,83332.Rv2442c,83332.Rv2464c,83332.Rv2607,83332.Rv2610c,83332.Rv2612c,83332.Rv2682c,83332.Rv2748c,83332.Rv2818c,83332.Rv2821c,83332.Rv2824c,83332.Rv2842c,83332.…	fhaB,lpqI,thiG,regX3,menH,sppA,deaD,argJ,argB,argD,Rv1697,ndh,Rv1856c,mpt64,cfp21,panB,ptpA,glpD1,rplU,nei1,pdxH,pimA,pgsA1,dxs1,ftsK,csm6,csm3,cas6,rimP,mqo,ffh,fadD26,drrA,fadE24,rhlE,groES,Rv3427c,Rv3814c,Rv3815c
GO Process	GO:0008152	Metabolic process	36	1630	0.28	0.00066	83332.Rv0237,83332.Rv0317c,83332.Rv0337c,83332.Rv0417,83332.Rv0558,83332.Rv0563,83332.Rv0724,83332.Rv0806c,83332.Rv1253,83332.Rv1331,83332.Rv1653,83332.Rv1654,83332.Rv1655,83332.Rv1697,83332.Rv1854c,83332.Rv1856c,83332.Rv1984c,83332.Rv2225,83332.Rv2234,83332.Rv2249c,83332.Rv2442c,83332.Rv2464c,83332.Rv2607,83332.Rv2610c,83332.Rv2612c,83332.Rv2682c,83332.Rv2818c,83332.Rv2821c,83332.Rv2824c,83332.R…	lpqI,glpQ2,aspC,thiG,menH,htpX,sppA,cpsY,deaD,clpS,argJ,argB,argD,Rv1697,ndh,Rv1856c,cfp21,panB,ptpA,glpD1,rplU,nei1,pdxH,pimA,pgsA1,dxs1,csm6,csm3,cas6,rimP,mqo,fadD26,fadE24,Rv3427c,Rv3814c,Rv3815c
GO Process	GO:0071704	Organic substance metabolic process	33	1494	0.28	0.0034	83332.Rv0237,83332.Rv0317c,83332.Rv0417,83332.Rv0558,83332.Rv0563,83332.Rv0724,83332.Rv0806c,83332.Rv1253,83332.Rv1331,83332.Rv1653,83332.Rv1654,83332.Rv1655,83332.Rv1697,83332.Rv1856c,83332.Rv1984c,83332.Rv2225,83332.Rv2234,83332.Rv2249c,83332.Rv2442c,83332.Rv2464c,83332.Rv2607,83332.Rv2610c,83332.Rv2612c,83332.Rv2682c,83332.Rv2818c,83332.Rv2821c,83332.Rv2824c,83332.Rv2842c,83332.Rv2930,83332.Rv…	lpqI,glpQ2,thiG,menH,htpX,sppA,cpsY,deaD,clpS,argJ,argB,argD,Rv1697,Rv1856c,cfp21,panB,ptpA,glpD1,rplU,nei1,pdxH,pimA,pgsA1,dxs1,csm6,csm3,cas6,rimP,fadD26,fadE24,Rv3427c,Rv3814c,Rv3815c
GO Process	GO:0044238	Primary metabolic process	29	1342	0.27	0.0326	83332.Rv0237,83332.Rv0317c,83332.Rv0563,83332.Rv0724,83332.Rv0806c,83332.Rv1253,83332.Rv1331,83332.Rv1653,83332.Rv1654,83332.Rv1655,83332.Rv1856c,83332.Rv1984c,83332.Rv2234,83332.Rv2249c,83332.Rv2442c,83332.Rv2464c,83332.Rv2610c,83332.Rv2612c,83332.Rv2682c,83332.Rv2818c,83332.Rv2821c,83332.Rv2824c,83332.Rv2842c,83332.Rv2852c,83332.Rv2930,83332.Rv3139,83332.Rv3427c,83332.Rv3814c,83332.Rv3815c	lpqI,glpQ2,htpX,sppA,cpsY,deaD,clpS,argJ,argB,argD,Rv1856c,cfp21,ptpA,glpD1,rplU,nei1,pimA,pgsA1,dxs1,csm6,csm3,cas6,rimP,mqo,fadD26,fadE24,Rv3427c,Rv3814c,Rv3815c
GO Process	GO:0044237	Cellular metabolic process	30	1411	0.26	0.0326	83332.Rv0417,83332.Rv0558,83332.Rv0724,83332.Rv1253,83332.Rv1653,83332.Rv1654,83332.Rv1655,83332.Rv1697,83332.Rv1854c,83332.Rv1856c,83332.Rv1984c,83332.Rv2225,83332.Rv2234,83332.Rv2249c,83332.Rv2442c,83332.Rv2464c,83332.Rv2607,83332.Rv2610c,83332.Rv2612c,83332.Rv2682c,83332.Rv2818c,83332.Rv2821c,83332.Rv2824c,83332.Rv2842c,83332.Rv2852c,83332.Rv2930,83332.Rv3139,83332.Rv3427c,83332.Rv3814c,83332.…	thiG,menH,sppA,deaD,argJ,argB,argD,Rv1697,ndh,Rv1856c,cfp21,panB,ptpA,glpD1,rplU,nei1,pdxH,pimA,pgsA1,dxs1,csm6,csm3,cas6,rimP,mqo,fadD26,fadE24,Rv3427c,Rv3814c,Rv3815c

## Sheet: dCym_upregulated_Revigo
TermID	Name	Value	LogSize	Frequency	Uniqueness	Dispensability	PC_0	PC_1	Representative
GO:0008152	metabolic process	-3.18046	3.17522	66.9651	1	0	-3.38577	-4.90037	null
GO:0009987	cellular process	-4.21396	3.17464	66.8756	1	0	-3.13087	4.70852	null
GO:0044237	cellular metabolic process	-1.48678	3.03222	48.1647	0.870442	0.201075	5.3786	-2.35273	null
GO:0044238	primary metabolic process	-1.48678	3.09447	55.5953	0.870442	0	5.4859	1.69977	null

## Sheet: IlaE_downregulated_String
#category	term ID	term description	observed gene count	background gene count	strength	false discovery rate	matching proteins in your network (IDs)	matching proteins in your network (labels)
GO Process	GO:0071766	Actinobacterium-type cell wall biogenesis	18	65	0.72	6e-06	83332.Rv0503c,83332.Rv0642c,83332.Rv0643c,83332.Rv0644c,83332.Rv1527c,83332.Rv1660,83332.Rv1665,83332.Rv2048c,83332.Rv2246,83332.Rv2928,83332.Rv2959c,83332.Rv3392c,83332.Rv3515c,83332.Rv3800c,83332.Rv3808c,83332.Rv3809c,83332.Rv3825c,83332.Rv3826	cmaA2,mmaA4,mmaA3,mmaA2,pks5,pks10,pks11,pks12,kasB,tesA,Rv2959c,cmaA1,fadD19,pks13,glfT2,glf,pks2,fadD23
GO Process	GO:1901605	Alpha-amino acid metabolic process	19	139	0.41	0.0104	83332.Rv0070c,83332.Rv0255c,83332.Rv0509,83332.Rv0734,83332.Rv1071c,83332.Rv1079,83332.Rv1133c,83332.Rv1658,83332.Rv2201,83332.Rv2220,83332.Rv2334,83332.Rv2392,83332.Rv2773c,83332.Rv2780,83332.Rv2988c,83332.Rv3001c,83332.Rv3432c,83332.Rv3509c,83332.Rv3859c	glyA2,cobQ1,hemA,mapA,echA9,metB,metE,argG,asnB,glnA1,cysK1,cysH,dapB,ald,leuC,ilvC,gadB,ilvX,gltB
GO Process	GO:0043604	Amide biosynthetic process	26	139	0.55	8.01e-06	83332.Rv0641,83332.Rv0684,83332.Rv0685,83332.Rv0701,83332.Rv0702,83332.Rv0703,83332.Rv0704,83332.Rv0706,83332.Rv0707,83332.Rv0719,83332.Rv0720,83332.Rv0721,83332.Rv1015c,83332.Rv1630,83332.Rv1641,83332.Rv1658,83332.Rv1689,83332.Rv2201,83332.Rv2357c,83332.Rv2845c,83332.Rv2889c,83332.Rv2890c,83332.Rv2909c,83332.Rv3404c,83332.Rv3443c,83332.Rv3602c	rplA,fusA1,tuf,rplC,rplD,rplW,rplB,rplV,rpsC,rplF,rplR,rpsE,rplY,rpsA,infC,argG,tyrS,asnB,glyS,proS,tsf,rpsB,rpsP,Rv3404c,rplM,panC
GO Process	GO:0044419	Biological process involved in interspecies interaction between organisms	29	287	0.28	0.0285	83332.Rv0169,83332.Rv0170,83332.Rv0176,83332.Rv0177,83332.Rv0183,83332.Rv0212c,83332.Rv0392c,83332.Rv0503c,83332.Rv0824c,83332.Rv0888,83332.Rv1755c,83332.Rv1860,83332.Rv2349c,83332.Rv2351c,83332.Rv2416c,83332.Rv2528c,83332.Rv2818c,83332.Rv2824c,83332.Rv2928,83332.Rv3084,83332.Rv3088,83332.Rv3089,83332.Rv3237c,83332.Rv3246c,83332.Rv3487c,83332.Rv3515c,83332.Rv3516,83332.Rv3545c,83332.Rv3570c	mce1A,mce1B,Rv0176,Rv0177,Rv0183,nadR,ndhA,cmaA2,desA1,spmT,plcD,apa,plcC,plcA,eis,mrr,csm6,cas6,tesA,lipR,tgs4,fadD13,Rv3237c,mtrA,lipF,fadD19,echA19,cyp125,hsaA
GO Process	GO:0009058	Biosynthetic process	115	779	0.44	1.62e-24	83332.Rv0001,83332.Rv0002,83332.Rv0035,83332.Rv0046c,83332.Rv0070c,83332.Rv0212c,83332.Rv0216,83332.Rv0255c,83332.Rv0489,83332.Rv0503c,83332.Rv0504c,83332.Rv0509,83332.Rv0533c,83332.Rv0637,83332.Rv0641,83332.Rv0642c,83332.Rv0643c,83332.Rv0644c,83332.Rv0684,83332.Rv0685,83332.Rv0701,83332.Rv0702,83332.Rv0703,83332.Rv0704,83332.Rv0706,83332.Rv0707,83332.Rv0719,83332.Rv0720,83332.Rv0721,83332.Rv0772…	dnaA,dnaN,fadD34,ino1,glyA2,nadR,Rv0216,cobQ1,gpm1,cmaA2,Rv0504c,hemA,fabH,hadC,rplA,mmaA4,mmaA3,mmaA2,fusA1,tuf,rplC,rplD,rplW,rplB,rplV,rpsC,rplF,rplR,rpsE,purD,desA1,galU,pks16,rplY,prsA,metB,desA2,metE,mshB,pks4,fadD21,log,cysD,cysN,rho,murA,pyrB,dfp,metK,pks5,lgt,rpsA,coaE,infC,argG,pks10,pks11,tyrS,lipJ,pks12,hisG,asnB,glnA1,fabD,kasA,kasB,cdh,cysK1,glyS,uppS,cysH,fadD9,pdxH,dut,suhB,dapB,p…
GO Process	GO:1901137	Carbohydrate derivative biosynthetic process	21	181	0.34	0.0297	83332.Rv0001,83332.Rv0772,83332.Rv1017c,83332.Rv1170,83332.Rv1315,83332.Rv1380,83332.Rv1391,83332.Rv1631,83332.Rv1900c,83332.Rv2697c,83332.Rv2959c,83332.Rv3032,83332.Rv3048c,83332.Rv3137,83332.Rv3261,83332.Rv3309c,83332.Rv3330,83332.Rv3441c,83332.Rv3600c,83332.Rv3624c,83332.Rv3808c	dnaA,purD,prsA,mshB,murA,pyrB,dfp,coaE,lipJ,dut,Rv2959c,Rv3032,nrdF2,hisN,fbiA,upp,dacB1,mrsA,coaX,hpt,glfT2
GO Process	GO:1901135	Carbohydrate derivative metabolic process	28	263	0.3	0.0175	83332.Rv0001,83332.Rv0489,83332.Rv0533c,83332.Rv0772,83332.Rv0993,83332.Rv1017c,83332.Rv1170,83332.Rv1315,83332.Rv1380,83332.Rv1391,83332.Rv1631,83332.Rv1700,83332.Rv1900c,83332.Rv2416c,83332.Rv2697c,83332.Rv2959c,83332.Rv3032,83332.Rv3048c,83332.Rv3137,83332.Rv3261,83332.Rv3309c,83332.Rv3330,83332.Rv3332,83332.Rv3393,83332.Rv3441c,83332.Rv3600c,83332.Rv3624c,83332.Rv3808c	dnaA,gpm1,fabH,purD,galU,prsA,mshB,murA,pyrB,dfp,coaE,Rv1700,lipJ,eis,dut,Rv2959c,Rv3032,nrdF2,hisN,fbiA,upp,dacB1,nagA,iunH,mrsA,coaX,hpt,glfT2
GO Process	GO:0005975	Carbohydrate metabolic process	19	157	0.36	0.0321	83332.Rv0046c,83332.Rv0489,83332.Rv0727c,83332.Rv1017c,83332.Rv2701c,83332.Rv3031,83332.Rv3032,83332.Rv3088,83332.Rv3137,83332.Rv3214,83332.Rv3261,83332.Rv3332,83332.Rv3404c,83332.Rv3441c,83332.Rv3480c,83332.Rv3490,83332.Rv3734c,83332.Rv3808c,83332.Rv3809c	ino1,gpm1,fucA,prsA,suhB,Rv3031,Rv3032,tgs4,hisN,gpm2,fbiA,nagA,Rv3404c,mrsA,Rv3480c,otsA,tgs2,glfT2,glf
GO Process	GO:0046394	Carboxylic acid biosynthetic process	45	231	0.56	5.46e-11	83332.Rv0035,83332.Rv0070c,83332.Rv0216,83332.Rv0503c,83332.Rv0504c,83332.Rv0533c,83332.Rv0637,83332.Rv0642c,83332.Rv0643c,83332.Rv0644c,83332.Rv0824c,83332.Rv1013,83332.Rv1079,83332.Rv1094,83332.Rv1133c,83332.Rv1181,83332.Rv1185c,83332.Rv1527c,83332.Rv1658,83332.Rv1660,83332.Rv1665,83332.Rv2048c,83332.Rv2121c,83332.Rv2201,83332.Rv2220,83332.Rv2243,83332.Rv2245,83332.Rv2246,83332.Rv2334,83332.Rv2…	fadD34,glyA2,Rv0216,cmaA2,Rv0504c,fabH,hadC,mmaA4,mmaA3,mmaA2,desA1,pks16,metB,desA2,metE,pks4,fadD21,pks5,argG,pks10,pks11,pks12,hisG,asnB,glnA1,fabD,kasA,kasB,cysK1,cysH,fadD9,dapB,leuC,ilvC,fadD13,hisN,fbiA,cmaA1,ilvX,fadD19,panC,pks13,pks2,fadD23,gltB
GO Process	GO:0019752	Carboxylic acid metabolic process	63	420	0.45	2e-11	83332.Rv0035,83332.Rv0070c,83332.Rv0119,83332.Rv0216,83332.Rv0255c,83332.Rv0489,83332.Rv0503c,83332.Rv0504c,83332.Rv0509,83332.Rv0533c,83332.Rv0637,83332.Rv0642c,83332.Rv0643c,83332.Rv0644c,83332.Rv0734,83332.Rv0824c,83332.Rv1013,83332.Rv1071c,83332.Rv1079,83332.Rv1094,83332.Rv1133c,83332.Rv1181,83332.Rv1185c,83332.Rv1380,83332.Rv1391,83332.Rv1527c,83332.Rv1658,83332.Rv1660,83332.Rv1665,83332.Rv1…	fadD34,glyA2,fadD7,Rv0216,cobQ1,gpm1,cmaA2,Rv0504c,hemA,fabH,hadC,mmaA4,mmaA3,mmaA2,mapA,desA1,pks16,echA9,metB,desA2,metE,pks4,fadD21,pyrB,dfp,pks5,argG,pks10,pks11,tyrS,lldD2,pks12,hisG,asnB,glnA1,fabD,kasA,kasB,cysK1,glyS,cysH,fadD9,dapB,ald,proS,leuC,ilvC,fadD13,hisN,fbiA,htdY,cmaA1,gadB,ilvX,fadD19,ltp4,fadA5,hsaA,panC,pks13,pks2,fadD23,gltB
GO Process	GO:0009056	Catabolic process	31	275	0.33	0.0043	83332.Rv0070c,83332.Rv0183,83332.Rv0489,83332.Rv0727c,83332.Rv0791c,83332.Rv0888,83332.Rv1071c,83332.Rv1161,83332.Rv1341,83332.Rv1391,83332.Rv1592c,83332.Rv1755c,83332.Rv1908c,83332.Rv2289,83332.Rv2416c,83332.Rv2457c,83332.Rv2579,83332.Rv2697c,83332.Rv2701c,83332.Rv2780,83332.Rv3137,83332.Rv3332,83332.Rv3389c,83332.Rv3393,83332.Rv3432c,83332.Rv3479,83332.Rv3518c,83332.Rv3522,83332.Rv3545c,83332.R…	glyA2,Rv0183,gpm1,fucA,Rv0791c,spmT,echA9,narG,Rv1341,dfp,Rv1592c,plcD,katG,cdh,eis,clpX,dhaA,dut,suhB,ald,hisN,nagA,htdY,iunH,gadB,Rv3479,cyp142,ltp4,cyp125,fadA5,hsaA
GO Process	GO:0007154	Cell communication	15	100	0.45	0.0175	83332.Rv0560c,83332.Rv1285,83332.Rv1286,83332.Rv1860,83332.Rv1900c,83332.Rv2027c,83332.Rv2557,83332.Rv2592c,83332.Rv2593c,83332.Rv2701c,83332.Rv2737c,83332.Rv2895c,83332.Rv3246c,83332.Rv3597c,83332.Rv3825c	Rv0560c,cysD,cysN,apa,lipJ,dosT,Rv2557,ruvB,ruvA,suhB,recA,viuB,mtrA,lsr2,pks2
GO Process	GO:0044038	Cell wall macromolecule biosynthetic process	10	51	0.57	0.0239	83332.Rv0503c,83332.Rv0642c,83332.Rv0643c,83332.Rv0644c,83332.Rv1315,83332.Rv2246,83332.Rv3330,83332.Rv3392c,83332.Rv3441c,83332.Rv3808c	cmaA2,mmaA4,mmaA3,mmaA2,murA,kasB,dacB1,cmaA1,mrsA,glfT2
GO Process	GO:0071554	Cell wall organization or biogenesis	24	129	0.54	2.42e-05	83332.Rv0503c,83332.Rv0642c,83332.Rv0643c,83332.Rv0644c,83332.Rv1017c,83332.Rv1315,83332.Rv1477,83332.Rv1527c,83332.Rv1660,83332.Rv1665,83332.Rv2048c,83332.Rv2246,83332.Rv2928,83332.Rv2959c,83332.Rv3330,83332.Rv3392c,83332.Rv3441c,83332.Rv3515c,83332.Rv3800c,83332.Rv3808c,83332.Rv3809c,83332.Rv3825c,83332.Rv3826,83332.Rv3920c	cmaA2,mmaA4,mmaA3,mmaA2,prsA,murA,ripA,pks5,pks10,pks11,pks12,kasB,tesA,Rv2959c,dacB1,cmaA1,mrsA,fadD19,pks13,glfT2,glf,pks2,fadD23,Rv3920c
GO Process	GO:0043603	Cellular amide metabolic process	30	167	0.53	1.9e-06	83332.Rv0070c,83332.Rv0533c,83332.Rv0641,83332.Rv0684,83332.Rv0685,83332.Rv0701,83332.Rv0702,83332.Rv0703,83332.Rv0704,83332.Rv0706,83332.Rv0707,83332.Rv0719,83332.Rv0720,83332.Rv0721,83332.Rv0888,83332.Rv1015c,83332.Rv1391,83332.Rv1630,83332.Rv1641,83332.Rv1658,83332.Rv1689,83332.Rv2201,83332.Rv2357c,83332.Rv2845c,83332.Rv2889c,83332.Rv2890c,83332.Rv2909c,83332.Rv3404c,83332.Rv3443c,83332.Rv3602c	glyA2,fabH,rplA,fusA1,tuf,rplC,rplD,rplW,rplB,rplV,rpsC,rplF,rplR,rpsE,spmT,rplY,dfp,rpsA,infC,argG,tyrS,asnB,glyS,proS,tsf,rpsB,rpsP,Rv3404c,rplM,panC
GO Process	GO:0008652	Cellular amino acid biosynthetic process	15	115	0.39	0.0494	83332.Rv0070c,83332.Rv1079,83332.Rv1133c,83332.Rv1658,83332.Rv2121c,83332.Rv2201,83332.Rv2220,83332.Rv2334,83332.Rv2392,83332.Rv2773c,83332.Rv2988c,83332.Rv3001c,83332.Rv3137,83332.Rv3509c,83332.Rv3859c	glyA2,metB,metE,argG,hisG,asnB,glnA1,cysK1,cysH,dapB,leuC,ilvC,hisN,ilvX,gltB
GO Process	GO:0006520	Cellular amino acid metabolic process	26	189	0.41	0.00092	83332.Rv0070c,83332.Rv0255c,83332.Rv0509,83332.Rv0734,83332.Rv1071c,83332.Rv1079,83332.Rv1133c,83332.Rv1380,83332.Rv1658,83332.Rv1689,83332.Rv2121c,83332.Rv2201,83332.Rv2220,83332.Rv2334,83332.Rv2357c,83332.Rv2392,83332.Rv2773c,83332.Rv2780,83332.Rv2845c,83332.Rv2988c,83332.Rv3001c,83332.Rv3137,83332.Rv3432c,83332.Rv3509c,83332.Rv3602c,83332.Rv3859c	glyA2,cobQ1,hemA,mapA,echA9,metB,metE,pyrB,argG,tyrS,hisG,asnB,glnA1,cysK1,glyS,cysH,dapB,ald,proS,leuC,ilvC,hisN,gadB,ilvX,panC,gltB
GO Process	GO:0006725	Cellular aromatic compound metabolic process	53	649	0.19	0.029	83332.Rv0001,83332.Rv0002,83332.Rv0070c,83332.Rv0212c,83332.Rv0255c,83332.Rv0489,83332.Rv0509,83332.Rv0533c,83332.Rv0631c,83332.Rv0641,83332.Rv0772,83332.Rv0993,83332.Rv1010,83332.Rv1017c,83332.Rv1205,83332.Rv1297,83332.Rv1315,83332.Rv1341,83332.Rv1380,83332.Rv1391,83332.Rv1631,83332.Rv1665,83332.Rv1689,83332.Rv1700,83332.Rv1900c,83332.Rv2338c,83332.Rv2357c,83332.Rv2528c,83332.Rv2592c,83332.Rv259…	dnaA,dnaN,glyA2,nadR,cobQ1,gpm1,hemA,fabH,recC,rplA,purD,galU,ksgA,prsA,log,rho,murA,Rv1341,pyrB,dfp,coaE,pks11,tyrS,Rv1700,lipJ,moeW,glyS,mrr,ruvB,ruvA,pdxH,dut,recA,csm6,cas6,proS,trmD,mutT1,Rv3030,nrdF2,upp,iunH,Rv3404c,mrsA,rpoA,ltp4,fadA5,hsaA,lsr2,coaX,hpt,Rv3788,glfT2
GO Process	GO:0044249	Cellular biosynthetic process	110	741	0.45	2.26e-23	83332.Rv0001,83332.Rv0002,83332.Rv0035,83332.Rv0046c,83332.Rv0070c,83332.Rv0212c,83332.Rv0216,83332.Rv0255c,83332.Rv0503c,83332.Rv0504c,83332.Rv0509,83332.Rv0533c,83332.Rv0637,83332.Rv0641,83332.Rv0642c,83332.Rv0643c,83332.Rv0644c,83332.Rv0684,83332.Rv0685,83332.Rv0701,83332.Rv0702,83332.Rv0703,83332.Rv0704,83332.Rv0706,83332.Rv0707,83332.Rv0719,83332.Rv0720,83332.Rv0721,83332.Rv0772,83332.Rv0824…	dnaA,dnaN,fadD34,ino1,glyA2,nadR,Rv0216,cobQ1,cmaA2,Rv0504c,hemA,fabH,hadC,rplA,mmaA4,mmaA3,mmaA2,fusA1,tuf,rplC,rplD,rplW,rplB,rplV,rpsC,rplF,rplR,rpsE,purD,desA1,pks16,rplY,prsA,metB,desA2,metE,mshB,pks4,fadD21,log,cysD,cysN,rho,murA,pyrB,dfp,metK,pks5,lgt,rpsA,coaE,infC,argG,pks10,pks11,tyrS,lipJ,pks12,hisG,asnB,glnA1,fabD,kasA,kasB,cdh,cysK1,glyS,uppS,cysH,fadD9,pdxH,dut,suhB,dapB,proS,tsf,rp…
GO Process	GO:0044262	Cellular carbohydrate metabolic process	13	91	0.43	0.048	83332.Rv0046c,83332.Rv1017c,83332.Rv2701c,83332.Rv3031,83332.Rv3032,83332.Rv3088,83332.Rv3137,83332.Rv3261,83332.Rv3480c,83332.Rv3490,83332.Rv3734c,83332.Rv3808c,83332.Rv3809c	ino1,prsA,suhB,Rv3031,Rv3032,tgs4,hisN,fbiA,Rv3480c,otsA,tgs2,glfT2,glf
GO Process	GO:0022607	Cellular component assembly	13	84	0.46	0.029	83332.Rv0503c,83332.Rv0703,83332.Rv0706,83332.Rv1527c,83332.Rv1660,83332.Rv1665,83332.Rv2048c,83332.Rv2364c,83332.Rv2928,83332.Rv2959c,83332.Rv3800c,83332.Rv3808c,83332.Rv3825c	cmaA2,rplW,rplV,pks5,pks10,pks11,pks12,era,tesA,Rv2959c,pks13,glfT2,pks2
GO Process	GO:0044085	Cellular component biogenesis	26	172	0.45	0.00022	83332.Rv0503c,83332.Rv0641,83332.Rv0642c,83332.Rv0643c,83332.Rv0644c,83332.Rv0703,83332.Rv0706,83332.Rv1010,83332.Rv1315,83332.Rv1527c,83332.Rv1660,83332.Rv1665,83332.Rv2048c,83332.Rv2246,83332.Rv2364c,83332.Rv2928,83332.Rv2959c,83332.Rv3330,83332.Rv3392c,83332.Rv3441c,83332.Rv3515c,83332.Rv3800c,83332.Rv3808c,83332.Rv3809c,83332.Rv3825c,83332.Rv3826	cmaA2,rplA,mmaA4,mmaA3,mmaA2,rplW,rplV,ksgA,murA,pks5,pks10,pks11,pks12,kasB,era,tesA,Rv2959c,dacB1,cmaA1,mrsA,fadD19,pks13,glfT2,glf,pks2,fadD23
GO Process	GO:0016043	Cellular component organization	24	189	0.38	0.0052	83332.Rv0503c,83332.Rv0631c,83332.Rv0684,83332.Rv0703,83332.Rv0706,83332.Rv1017c,83332.Rv1315,83332.Rv1477,83332.Rv1527c,83332.Rv1641,83332.Rv1660,83332.Rv1665,83332.Rv2048c,83332.Rv2364c,83332.Rv2592c,83332.Rv2593c,83332.Rv2928,83332.Rv2959c,83332.Rv3330,83332.Rv3800c,83332.Rv3808c,83332.Rv3809c,83332.Rv3825c,83332.Rv3920c	cmaA2,recC,fusA1,rplW,rplV,prsA,murA,ripA,pks5,infC,pks10,pks11,pks12,era,ruvB,ruvA,tesA,Rv2959c,dacB1,pks13,glfT2,glf,pks2,Rv3920c
GO Process	GO:0071840	Cellular component organization or biogenesis	34	240	0.43	2.85e-05	83332.Rv0503c,83332.Rv0631c,83332.Rv0641,83332.Rv0642c,83332.Rv0643c,83332.Rv0644c,83332.Rv0684,83332.Rv0703,83332.Rv0706,83332.Rv1010,83332.Rv1017c,83332.Rv1315,83332.Rv1477,83332.Rv1527c,83332.Rv1641,83332.Rv1660,83332.Rv1665,83332.Rv2048c,83332.Rv2246,83332.Rv2364c,83332.Rv2592c,83332.Rv2593c,83332.Rv2928,83332.Rv2959c,83332.Rv3330,83332.Rv3392c,83332.Rv3441c,83332.Rv3515c,83332.Rv3800c,83332.…	cmaA2,recC,rplA,mmaA4,mmaA3,mmaA2,fusA1,rplW,rplV,ksgA,prsA,murA,ripA,pks5,infC,pks10,pks11,pks12,kasB,era,ruvB,ruvA,tesA,Rv2959c,dacB1,cmaA1,mrsA,fadD19,pks13,glfT2,glf,pks2,fadD23,Rv3920c
GO Process	GO:0044255	Cellular lipid metabolic process	44	274	0.48	1.95e-08	83332.Rv0035,83332.Rv0046c,83332.Rv0119,83332.Rv0183,83332.Rv0216,83332.Rv0503c,83332.Rv0504c,83332.Rv0533c,83332.Rv0637,83332.Rv0642c,83332.Rv0643c,83332.Rv0644c,83332.Rv0824c,83332.Rv0888,83332.Rv1013,83332.Rv1094,83332.Rv1181,83332.Rv1185c,83332.Rv1527c,83332.Rv1660,83332.Rv1665,83332.Rv2048c,83332.Rv2243,83332.Rv2245,83332.Rv2246,83332.Rv2289,83332.Rv2361c,83332.Rv2590,83332.Rv2701c,83332.Rv3…	fadD34,ino1,fadD7,Rv0183,Rv0216,cmaA2,Rv0504c,fabH,hadC,mmaA4,mmaA3,mmaA2,desA1,spmT,pks16,desA2,pks4,fadD21,pks5,pks10,pks11,pks12,fabD,kasA,kasB,cdh,uppS,fadD9,suhB,Rv3032,tgs4,fadD13,htdY,cmaA1,Rv3480c,fadD19,ltp4,fadA5,hsaA,tgs2,pks13,glfT2,pks2,fadD23
GO Process	GO:0034645	Cellular macromolecule biosynthetic process	39	185	0.6	2.8e-10	83332.Rv0503c,83332.Rv0641,83332.Rv0642c,83332.Rv0643c,83332.Rv0644c,83332.Rv0684,83332.Rv0685,83332.Rv0701,83332.Rv0702,83332.Rv0703,83332.Rv0704,83332.Rv0706,83332.Rv0707,83332.Rv0719,83332.Rv0720,83332.Rv0721,83332.Rv1015c,83332.Rv1017c,83332.Rv1315,83332.Rv1614,83332.Rv1630,83332.Rv1641,83332.Rv1689,83332.Rv2246,83332.Rv2357c,83332.Rv2845c,83332.Rv2889c,83332.Rv2890c,83332.Rv2909c,83332.Rv295…	cmaA2,rplA,mmaA4,mmaA3,mmaA2,fusA1,tuf,rplC,rplD,rplW,rplB,rplV,rpsC,rplF,rplR,rpsE,rplY,prsA,murA,lgt,rpsA,infC,tyrS,kasB,glyS,proS,tsf,rpsB,rpsP,Rv2959c,Rv3031,Rv3032,dacB1,cmaA1,Rv3404c,mrsA,rplM,glfT2,glf
GO Process	GO:0044260	Cellular macromolecule metabolic process	53	434	0.36	1.34e-06	83332.Rv0001,83332.Rv0002,83332.Rv0503c,83332.Rv0631c,83332.Rv0641,83332.Rv0642c,83332.Rv0643c,83332.Rv0644c,83332.Rv0684,83332.Rv0685,83332.Rv0701,83332.Rv0702,83332.Rv0703,83332.Rv0704,83332.Rv0706,83332.Rv0707,83332.Rv0719,83332.Rv0720,83332.Rv0721,83332.Rv1010,83332.Rv1015c,83332.Rv1017c,83332.Rv1315,83332.Rv1614,83332.Rv1630,83332.Rv1641,83332.Rv1689,83332.Rv1700,83332.Rv2246,83332.Rv2357c,8…	dnaA,dnaN,cmaA2,recC,rplA,mmaA4,mmaA3,mmaA2,fusA1,tuf,rplC,rplD,rplW,rplB,rplV,rpsC,rplF,rplR,rpsE,ksgA,rplY,prsA,murA,lgt,rpsA,infC,tyrS,Rv1700,kasB,glyS,mrr,ruvB,ruvA,recA,proS,tsf,rpsB,trmD,rpsP,Rv2959c,mutT1,Rv3030,Rv3031,Rv3032,nrdF2,dacB1,cmaA1,Rv3404c,mrsA,rplM,lsr2,glfT2,glf
GO Process	GO:0044237	Cellular metabolic process	158	1411	0.32	1.88e-26	83332.Rv0001,83332.Rv0002,83332.Rv0035,83332.Rv0046c,83332.Rv0070c,83332.Rv0119,83332.Rv0183,83332.Rv0212c,83332.Rv0216,83332.Rv0255c,83332.Rv0489,83332.Rv0503c,83332.Rv0504c,83332.Rv0509,83332.Rv0533c,83332.Rv0631c,83332.Rv0637,83332.Rv0641,83332.Rv0642c,83332.Rv0643c,83332.Rv0644c,83332.Rv0684,83332.Rv0685,83332.Rv0688,83332.Rv0701,83332.Rv0702,83332.Rv0703,83332.Rv0704,83332.Rv0706,83332.Rv070…	dnaA,dnaN,fadD34,ino1,glyA2,fadD7,Rv0183,nadR,Rv0216,cobQ1,gpm1,cmaA2,Rv0504c,hemA,fabH,recC,hadC,rplA,mmaA4,mmaA3,mmaA2,fusA1,tuf,Rv0688,rplC,rplD,rplW,rplB,rplV,rpsC,rplF,rplR,rpsE,mapA,purD,desA1,spmT,galU,ksgA,pks16,rplY,prsA,echA9,metB,desA2,metE,narG,narH,mshB,pks4,fadD21,log,cysD,cysN,rho,murA,Rv1341,pyrB,dfp,metK,pks5,lgt,rpsA,coaE,infC,argG,pks10,pks11,tyrS,Rv1700,garA,lldD2,lipJ,katG,do…
GO Process	GO:0044271	Cellular nitrogen compound biosynthetic process	48	360	0.4	6.25e-07	83332.Rv0001,83332.Rv0002,83332.Rv0212c,83332.Rv0255c,83332.Rv0509,83332.Rv0641,83332.Rv0684,83332.Rv0685,83332.Rv0701,83332.Rv0702,83332.Rv0703,83332.Rv0704,83332.Rv0706,83332.Rv0707,83332.Rv0719,83332.Rv0720,83332.Rv0721,83332.Rv0772,83332.Rv1015c,83332.Rv1017c,83332.Rv1297,83332.Rv1315,83332.Rv1380,83332.Rv1391,83332.Rv1630,83332.Rv1631,83332.Rv1641,83332.Rv1658,83332.Rv1689,83332.Rv1900c,8333…	dnaA,dnaN,nadR,cobQ1,hemA,rplA,fusA1,tuf,rplC,rplD,rplW,rplB,rplV,rpsC,rplF,rplR,rpsE,purD,rplY,prsA,rho,murA,pyrB,dfp,rpsA,coaE,infC,argG,tyrS,lipJ,asnB,glyS,pdxH,dut,proS,tsf,rpsB,rpsP,nrdF2,upp,Rv3404c,mrsA,rplM,rpoA,coaX,panC,hpt,Rv3788
GO Process	GO:0034641	Cellular nitrogen compound metabolic process	71	740	0.26	2.22e-05	83332.Rv0001,83332.Rv0002,83332.Rv0070c,83332.Rv0212c,83332.Rv0255c,83332.Rv0489,83332.Rv0509,83332.Rv0533c,83332.Rv0631c,83332.Rv0641,83332.Rv0684,83332.Rv0685,83332.Rv0701,83332.Rv0702,83332.Rv0703,83332.Rv0704,83332.Rv0706,83332.Rv0707,83332.Rv0719,83332.Rv0720,83332.Rv0721,83332.Rv0772,83332.Rv0888,83332.Rv0993,83332.Rv1010,83332.Rv1015c,83332.Rv1017c,83332.Rv1161,83332.Rv1297,83332.Rv1315,83…	dnaA,dnaN,glyA2,nadR,cobQ1,gpm1,hemA,fabH,recC,rplA,fusA1,tuf,rplC,rplD,rplW,rplB,rplV,rpsC,rplF,rplR,rpsE,purD,spmT,galU,ksgA,rplY,prsA,narG,rho,murA,Rv1341,pyrB,dfp,rpsA,coaE,infC,argG,tyrS,Rv1700,lipJ,asnB,moeW,glyS,mrr,ruvB,ruvA,pdxH,dut,recA,csm6,cas6,proS,tsf,rpsB,trmD,rpsP,mutT1,Rv3030,nrdF2,upp,iunH,Rv3404c,mrsA,rplM,rpoA,lsr2,coaX,panC,hpt,Rv3788,glfT2
GO Process	GO:0009987	Cellular process	176	1738	0.28	2.29e-27	83332.Rv0001,83332.Rv0002,83332.Rv0035,83332.Rv0046c,83332.Rv0070c,83332.Rv0073,83332.Rv0119,83332.Rv0169,83332.Rv0183,83332.Rv0212c,83332.Rv0216,83332.Rv0255c,83332.Rv0384c,83332.Rv0489,83332.Rv0503c,83332.Rv0504c,83332.Rv0509,83332.Rv0533c,83332.Rv0560c,83332.Rv0631c,83332.Rv0637,83332.Rv0641,83332.Rv0642c,83332.Rv0643c,83332.Rv0644c,83332.Rv0684,83332.Rv0685,83332.Rv0688,83332.Rv0701,83332.Rv0…	dnaA,dnaN,fadD34,ino1,glyA2,Rv0073,fadD7,mce1A,Rv0183,nadR,Rv0216,cobQ1,clpB,gpm1,cmaA2,Rv0504c,hemA,fabH,Rv0560c,recC,hadC,rplA,mmaA4,mmaA3,mmaA2,fusA1,tuf,Rv0688,rplC,rplD,rplW,rplB,rplV,rpsC,rplF,rplR,rpsE,mapA,purD,desA1,spmT,galU,ksgA,pks16,rplY,prsA,echA9,metB,desA2,metE,narG,narH,mshB,pks4,fadD21,log,cysD,cysN,rho,murA,Rv1341,pyrB,dfp,metK,ripA,pks5,lgt,rpsA,coaE,infC,argG,pks10,pks11,tyrS…
GO Process	GO:0070887	Cellular response to chemical stimulus	12	66	0.53	0.0145	83332.Rv0888,83332.Rv1161,83332.Rv1162,83332.Rv1285,83332.Rv1286,83332.Rv1900c,83332.Rv1908c,83332.Rv2521,83332.Rv2579,83332.Rv3522,83332.Rv3546,83332.Rv3597c	spmT,narG,narH,cysD,cysN,lipJ,katG,bcp,dhaA,ltp4,fadA5,lsr2
GO Process	GO:0031668	Cellular response to extracellular stimulus	11	47	0.64	0.0045	83332.Rv0560c,83332.Rv1285,83332.Rv1286,83332.Rv1860,83332.Rv2557,83332.Rv2592c,83332.Rv2593c,83332.Rv2737c,83332.Rv2895c,83332.Rv3597c,83332.Rv3825c	Rv0560c,cysD,cysN,apa,Rv2557,ruvB,ruvA,recA,viuB,lsr2,pks2
GO Process	GO:0051716	Cellular response to stimulus	28	222	0.38	0.0018	83332.Rv0384c,83332.Rv0560c,83332.Rv0631c,83332.Rv0888,83332.Rv1161,83332.Rv1162,83332.Rv1285,83332.Rv1286,83332.Rv1700,83332.Rv1860,83332.Rv1900c,83332.Rv1908c,83332.Rv2027c,83332.Rv2521,83332.Rv2557,83332.Rv2579,83332.Rv2592c,83332.Rv2593c,83332.Rv2701c,83332.Rv2737c,83332.Rv2895c,83332.Rv2985,83332.Rv3246c,83332.Rv3522,83332.Rv3546,83332.Rv3597c,83332.Rv3623,83332.Rv3825c	clpB,Rv0560c,recC,spmT,narG,narH,cysD,cysN,Rv1700,apa,lipJ,katG,dosT,bcp,Rv2557,dhaA,ruvB,ruvA,suhB,recA,viuB,mutT1,mtrA,ltp4,fadA5,lsr2,lpqG,pks2
GO Process	GO:0033554	Cellular response to stress	18	133	0.41	0.0157	83332.Rv0384c,83332.Rv0560c,83332.Rv0631c,83332.Rv1285,83332.Rv1286,83332.Rv1700,83332.Rv1860,83332.Rv1908c,83332.Rv2521,83332.Rv2557,83332.Rv2592c,83332.Rv2593c,83332.Rv2737c,83332.Rv2895c,83332.Rv2985,83332.Rv3597c,83332.Rv3623,83332.Rv3825c	clpB,Rv0560c,recC,cysD,cysN,Rv1700,apa,katG,bcp,Rv2557,ruvB,ruvA,recA,viuB,mutT1,lsr2,lpqG,pks2
GO Process	GO:0071770	DIM/DIP cell wall layer assembly	8	29	0.72	0.013	83332.Rv1527c,83332.Rv1660,83332.Rv1665,83332.Rv2048c,83332.Rv2928,83332.Rv2959c,83332.Rv3800c,83332.Rv3825c	pks5,pks10,pks11,pks12,tesA,Rv2959c,pks13,pks2
GO Process	GO:0006633	Fatty acid biosynthetic process	28	93	0.75	4.07e-10	83332.Rv0035,83332.Rv0216,83332.Rv0503c,83332.Rv0504c,83332.Rv0533c,83332.Rv0637,83332.Rv0642c,83332.Rv0643c,83332.Rv0644c,83332.Rv0824c,83332.Rv1013,83332.Rv1094,83332.Rv1181,83332.Rv1185c,83332.Rv1527c,83332.Rv1660,83332.Rv1665,83332.Rv2048c,83332.Rv2243,83332.Rv2245,83332.Rv2246,83332.Rv2590,83332.Rv3089,83332.Rv3392c,83332.Rv3515c,83332.Rv3800c,83332.Rv3825c,83332.Rv3826	fadD34,Rv0216,cmaA2,Rv0504c,fabH,hadC,mmaA4,mmaA3,mmaA2,desA1,pks16,desA2,pks4,fadD21,pks5,pks10,pks11,pks12,fabD,kasA,kasB,fadD9,fadD13,cmaA1,fadD19,pks13,pks2,fadD23
GO Process	GO:0006631	Fatty acid metabolic process	33	159	0.59	1.76e-08	83332.Rv0035,83332.Rv0119,83332.Rv0216,83332.Rv0503c,83332.Rv0504c,83332.Rv0533c,83332.Rv0637,83332.Rv0642c,83332.Rv0643c,83332.Rv0644c,83332.Rv0824c,83332.Rv1013,83332.Rv1094,83332.Rv1181,83332.Rv1185c,83332.Rv1527c,83332.Rv1660,83332.Rv1665,83332.Rv2048c,83332.Rv2243,83332.Rv2245,83332.Rv2246,83332.Rv2590,83332.Rv3089,83332.Rv3389c,83332.Rv3392c,83332.Rv3515c,83332.Rv3522,83332.Rv3546,83332.Rv3…	fadD34,fadD7,Rv0216,cmaA2,Rv0504c,fabH,hadC,mmaA4,mmaA3,mmaA2,desA1,pks16,desA2,pks4,fadD21,pks5,pks10,pks11,pks12,fabD,kasA,kasB,fadD9,fadD13,htdY,cmaA1,fadD19,ltp4,fadA5,hsaA,pks13,pks2,fadD23
GO Process	GO:0010467	Gene expression	32	209	0.46	1.56e-05	83332.Rv0641,83332.Rv0684,83332.Rv0685,83332.Rv0701,83332.Rv0702,83332.Rv0703,83332.Rv0704,83332.Rv0706,83332.Rv0707,83332.Rv0719,83332.Rv0720,83332.Rv0721,83332.Rv0734,83332.Rv1010,83332.Rv1015c,83332.Rv1297,83332.Rv1630,83332.Rv1641,83332.Rv1689,83332.Rv2338c,83332.Rv2357c,83332.Rv2737c,83332.Rv2845c,83332.Rv2889c,83332.Rv2890c,83332.Rv2906c,83332.Rv2909c,83332.Rv3030,83332.Rv3404c,83332.Rv3443…	rplA,fusA1,tuf,rplC,rplD,rplW,rplB,rplV,rpsC,rplF,rplR,rpsE,mapA,ksgA,rplY,rho,rpsA,infC,tyrS,moeW,glyS,recA,proS,tsf,rpsB,trmD,rpsP,Rv3030,Rv3404c,rplM,rpoA,Rv3788
GO Process	GO:0008610	Lipid biosynthetic process	40	214	0.55	2.97e-09	83332.Rv0035,83332.Rv0046c,83332.Rv0216,83332.Rv0503c,83332.Rv0504c,83332.Rv0533c,83332.Rv0637,83332.Rv0642c,83332.Rv0643c,83332.Rv0644c,83332.Rv0824c,83332.Rv1013,83332.Rv1094,83332.Rv1181,83332.Rv1185c,83332.Rv1527c,83332.Rv1660,83332.Rv1665,83332.Rv2048c,83332.Rv2243,83332.Rv2245,83332.Rv2246,83332.Rv2289,83332.Rv2361c,83332.Rv2590,83332.Rv2701c,83332.Rv2928,83332.Rv2959c,83332.Rv3032,83332.Rv…	fadD34,ino1,Rv0216,cmaA2,Rv0504c,fabH,hadC,mmaA4,mmaA3,mmaA2,desA1,pks16,desA2,pks4,fadD21,pks5,pks10,pks11,pks12,fabD,kasA,kasB,cdh,uppS,fadD9,suhB,tesA,Rv2959c,Rv3032,tgs4,fadD13,cmaA1,Rv3480c,fadD19,hsaA,tgs2,pks13,glfT2,pks2,fadD23
GO Process	GO:0006629	Lipid metabolic process	51	355	0.43	1.95e-08	83332.Rv0035,83332.Rv0046c,83332.Rv0119,83332.Rv0183,83332.Rv0216,83332.Rv0503c,83332.Rv0504c,83332.Rv0533c,83332.Rv0637,83332.Rv0642c,83332.Rv0643c,83332.Rv0644c,83332.Rv0824c,83332.Rv0888,83332.Rv1013,83332.Rv1094,83332.Rv1181,83332.Rv1185c,83332.Rv1527c,83332.Rv1592c,83332.Rv1660,83332.Rv1665,83332.Rv1755c,83332.Rv2048c,83332.Rv2243,83332.Rv2245,83332.Rv2246,83332.Rv2289,83332.Rv2361c,83332.Rv…	fadD34,ino1,fadD7,Rv0183,Rv0216,cmaA2,Rv0504c,fabH,hadC,mmaA4,mmaA3,mmaA2,desA1,spmT,pks16,desA2,pks4,fadD21,pks5,Rv1592c,pks10,pks11,plcD,pks12,fabD,kasA,kasB,cdh,uppS,fadD9,suhB,tesA,Rv2959c,Rv3032,tgs4,fadD13,htdY,cmaA1,Rv3479,Rv3480c,fadD19,cyp142,ltp4,cyp125,fadA5,hsaA,tgs2,pks13,glfT2,pks2,fadD23
GO Process	GO:0009059	Macromolecule biosynthetic process	43	232	0.54	6.91e-10	83332.Rv0002,83332.Rv0503c,83332.Rv0641,83332.Rv0642c,83332.Rv0643c,83332.Rv0644c,83332.Rv0684,83332.Rv0685,83332.Rv0701,83332.Rv0702,83332.Rv0703,83332.Rv0704,83332.Rv0706,83332.Rv0707,83332.Rv0719,83332.Rv0720,83332.Rv0721,83332.Rv1015c,83332.Rv1017c,83332.Rv1297,83332.Rv1315,83332.Rv1614,83332.Rv1630,83332.Rv1641,83332.Rv1689,83332.Rv2246,83332.Rv2357c,83332.Rv2845c,83332.Rv2889c,83332.Rv2890c…	dnaN,cmaA2,rplA,mmaA4,mmaA3,mmaA2,fusA1,tuf,rplC,rplD,rplW,rplB,rplV,rpsC,rplF,rplR,rpsE,rplY,prsA,rho,murA,lgt,rpsA,infC,tyrS,kasB,glyS,proS,tsf,rpsB,rpsP,Rv2959c,Rv3031,Rv3032,dacB1,cmaA1,Rv3404c,mrsA,rplM,rpoA,Rv3788,glfT2,glf
GO Process	GO:0043170	Macromolecule metabolic process	67	704	0.25	6.42e-05	83332.Rv0001,83332.Rv0002,83332.Rv0503c,83332.Rv0631c,83332.Rv0641,83332.Rv0642c,83332.Rv0643c,83332.Rv0644c,83332.Rv0684,83332.Rv0685,83332.Rv0688,83332.Rv0701,83332.Rv0702,83332.Rv0703,83332.Rv0704,83332.Rv0706,83332.Rv0707,83332.Rv0719,83332.Rv0720,83332.Rv0721,83332.Rv0734,83332.Rv1010,83332.Rv1015c,83332.Rv1017c,83332.Rv1297,83332.Rv1315,83332.Rv1477,83332.Rv1614,83332.Rv1630,83332.Rv1641,83…	dnaA,dnaN,cmaA2,recC,rplA,mmaA4,mmaA3,mmaA2,fusA1,tuf,Rv0688,rplC,rplD,rplW,rplB,rplV,rpsC,rplF,rplR,rpsE,mapA,ksgA,rplY,prsA,rho,murA,ripA,lgt,rpsA,infC,tyrS,Rv1700,garA,dosT,kasB,moeW,glyS,clpX,mrr,ruvB,ruvA,recA,pepR,csm6,cas6,proS,tsf,rpsB,trmD,rpsP,Rv2959c,mutT1,Rv3030,Rv3031,Rv3032,nrdF2,mtrA,dacB1,cmaA1,Rv3404c,mrsA,rplM,rpoA,lsr2,Rv3788,glfT2,glf
GO Process	GO:0008152	Metabolic process	178	1630	0.31	1.35e-32	83332.Rv0001,83332.Rv0002,83332.Rv0035,83332.Rv0046c,83332.Rv0070c,83332.Rv0119,83332.Rv0183,83332.Rv0212c,83332.Rv0216,83332.Rv0255c,83332.Rv0392c,83332.Rv0489,83332.Rv0503c,83332.Rv0504c,83332.Rv0509,83332.Rv0533c,83332.Rv0560c,83332.Rv0631c,83332.Rv0637,83332.Rv0641,83332.Rv0642c,83332.Rv0643c,83332.Rv0644c,83332.Rv0684,83332.Rv0685,83332.Rv0688,83332.Rv0701,83332.Rv0702,83332.Rv0703,83332.Rv0…	dnaA,dnaN,fadD34,ino1,glyA2,fadD7,Rv0183,nadR,Rv0216,cobQ1,ndhA,gpm1,cmaA2,Rv0504c,hemA,fabH,Rv0560c,recC,hadC,rplA,mmaA4,mmaA3,mmaA2,fusA1,tuf,Rv0688,rplC,rplD,rplW,rplB,rplV,rpsC,rplF,rplR,rpsE,fucA,Rv0731c,mapA,purD,Rv0791c,desA1,spmT,galU,ksgA,pks16,rplY,prsA,echA9,metB,desA2,metE,narG,narH,mshB,pks4,fadD21,log,cysD,cysN,rho,murA,Rv1341,pyrB,dfp,metK,ripA,pks5,Rv1592c,lgt,rpsA,coaE,infC,argG,…
GO Process	GO:0072330	Monocarboxylic acid biosynthetic process	29	108	0.7	1.57e-09	83332.Rv0035,83332.Rv0216,83332.Rv0503c,83332.Rv0504c,83332.Rv0533c,83332.Rv0637,83332.Rv0642c,83332.Rv0643c,83332.Rv0644c,83332.Rv0824c,83332.Rv1013,83332.Rv1094,83332.Rv1181,83332.Rv1185c,83332.Rv1527c,83332.Rv1660,83332.Rv1665,83332.Rv2048c,83332.Rv2243,83332.Rv2245,83332.Rv2246,83332.Rv2590,83332.Rv3089,83332.Rv3392c,83332.Rv3515c,83332.Rv3602c,83332.Rv3800c,83332.Rv3825c,83332.Rv3826	fadD34,Rv0216,cmaA2,Rv0504c,fabH,hadC,mmaA4,mmaA3,mmaA2,desA1,pks16,desA2,pks4,fadD21,pks5,pks10,pks11,pks12,fabD,kasA,kasB,fadD9,fadD13,cmaA1,fadD19,panC,pks13,pks2,fadD23
GO Process	GO:0032787	Monocarboxylic acid metabolic process	38	225	0.5	1.05e-07	83332.Rv0035,83332.Rv0119,83332.Rv0216,83332.Rv0489,83332.Rv0503c,83332.Rv0504c,83332.Rv0533c,83332.Rv0637,83332.Rv0642c,83332.Rv0643c,83332.Rv0644c,83332.Rv0824c,83332.Rv1013,83332.Rv1094,83332.Rv1181,83332.Rv1185c,83332.Rv1391,83332.Rv1527c,83332.Rv1660,83332.Rv1665,83332.Rv1872c,83332.Rv2048c,83332.Rv2243,83332.Rv2245,83332.Rv2246,83332.Rv2590,83332.Rv3089,83332.Rv3261,83332.Rv3389c,83332.Rv33…	fadD34,fadD7,Rv0216,gpm1,cmaA2,Rv0504c,fabH,hadC,mmaA4,mmaA3,mmaA2,desA1,pks16,desA2,pks4,fadD21,dfp,pks5,pks10,pks11,lldD2,pks12,fabD,kasA,kasB,fadD9,fadD13,fbiA,htdY,cmaA1,fadD19,ltp4,fadA5,hsaA,panC,pks13,pks2,fadD23
GO Process	GO:0071768	Mycolic acid biosynthetic process	6	13	0.94	0.0084	83332.Rv0503c,83332.Rv0642c,83332.Rv0643c,83332.Rv0644c,83332.Rv2246,83332.Rv3392c	cmaA2,mmaA4,mmaA3,mmaA2,kasB,cmaA1
GO Process	GO:0006807	Nitrogen compound metabolic process	100	1051	0.25	2.07e-08	83332.Rv0001,83332.Rv0002,83332.Rv0070c,83332.Rv0212c,83332.Rv0255c,83332.Rv0489,83332.Rv0509,83332.Rv0533c,83332.Rv0631c,83332.Rv0641,83332.Rv0684,83332.Rv0685,83332.Rv0688,83332.Rv0701,83332.Rv0702,83332.Rv0703,83332.Rv0704,83332.Rv0706,83332.Rv0707,83332.Rv0719,83332.Rv0720,83332.Rv0721,83332.Rv0734,83332.Rv0772,83332.Rv0888,83332.Rv0993,83332.Rv1010,83332.Rv1015c,83332.Rv1017c,83332.Rv1071c,8…	dnaA,dnaN,glyA2,nadR,cobQ1,gpm1,hemA,fabH,recC,rplA,fusA1,tuf,Rv0688,rplC,rplD,rplW,rplB,rplV,rpsC,rplF,rplR,rpsE,mapA,purD,spmT,galU,ksgA,rplY,prsA,echA9,metB,metE,narG,narH,log,rho,murA,Rv1341,pyrB,dfp,ripA,lgt,rpsA,coaE,infC,argG,tyrS,Rv1700,garA,lipJ,dosT,hisG,asnB,glnA1,cysK1,moeW,glyS,cysH,clpX,mrr,ruvB,ruvA,pdxH,dut,recA,dapB,ald,pepR,csm6,cas6,proS,tsf,rpsB,trmD,rpsP,Rv2959c,mutT1,leuC,il…
GO Process	GO:0034654	Nucleobase-containing compound biosynthetic process	20	157	0.38	0.0157	83332.Rv0001,83332.Rv0002,83332.Rv0212c,83332.Rv0772,83332.Rv1017c,83332.Rv1297,83332.Rv1315,83332.Rv1380,83332.Rv1391,83332.Rv1631,83332.Rv1900c,83332.Rv2357c,83332.Rv2697c,83332.Rv3048c,83332.Rv3309c,83332.Rv3441c,83332.Rv3457c,83332.Rv3600c,83332.Rv3624c,83332.Rv3788	dnaA,dnaN,nadR,purD,prsA,rho,murA,pyrB,dfp,coaE,lipJ,glyS,dut,nrdF2,upp,mrsA,rpoA,coaX,hpt,Rv3788
GO Process	GO:0055086	Nucleobase-containing small molecule metabolic process	23	167	0.41	0.0027	83332.Rv0001,83332.Rv0212c,83332.Rv0489,83332.Rv0533c,83332.Rv0772,83332.Rv0993,83332.Rv1017c,83332.Rv1315,83332.Rv1341,83332.Rv1380,83332.Rv1391,83332.Rv1631,83332.Rv1700,83332.Rv1900c,83332.Rv2357c,83332.Rv2697c,83332.Rv3048c,83332.Rv3309c,83332.Rv3393,83332.Rv3441c,83332.Rv3600c,83332.Rv3624c,83332.Rv3808c	dnaA,nadR,gpm1,fabH,purD,galU,prsA,murA,Rv1341,pyrB,dfp,coaE,Rv1700,lipJ,glyS,dut,nrdF2,upp,iunH,mrsA,coaX,hpt,glfT2
GO Process	GO:0006753	Nucleoside phosphate metabolic process	18	139	0.39	0.0239	83332.Rv0001,83332.Rv0212c,83332.Rv0489,83332.Rv0533c,83332.Rv0772,83332.Rv1017c,83332.Rv1341,83332.Rv1380,83332.Rv1391,83332.Rv1631,83332.Rv1700,83332.Rv1900c,83332.Rv2357c,83332.Rv2697c,83332.Rv3048c,83332.Rv3309c,83332.Rv3600c,83332.Rv3624c	dnaA,nadR,gpm1,fabH,purD,prsA,Rv1341,pyrB,dfp,coaE,Rv1700,lipJ,glyS,dut,nrdF2,upp,coaX,hpt
GO Process	GO:0009165	Nucleotide biosynthetic process	14	98	0.43	0.0348	83332.Rv0001,83332.Rv0212c,83332.Rv0772,83332.Rv1017c,83332.Rv1380,83332.Rv1391,83332.Rv1631,83332.Rv1900c,83332.Rv2357c,83332.Rv2697c,83332.Rv3048c,83332.Rv3309c,83332.Rv3600c,83332.Rv3624c	dnaA,nadR,purD,prsA,pyrB,dfp,coaE,lipJ,glyS,dut,nrdF2,upp,coaX,hpt
GO Process	GO:0009117	Nucleotide metabolic process	17	137	0.37	0.0431	83332.Rv0001,83332.Rv0212c,83332.Rv0489,83332.Rv0533c,83332.Rv0772,83332.Rv1017c,83332.Rv1341,83332.Rv1380,83332.Rv1391,83332.Rv1631,83332.Rv1900c,83332.Rv2357c,83332.Rv2697c,83332.Rv3048c,83332.Rv3309c,83332.Rv3600c,83332.Rv3624c	dnaA,nadR,gpm1,fabH,purD,prsA,Rv1341,pyrB,dfp,coaE,lipJ,glyS,dut,nrdF2,upp,coaX,hpt
GO Process	GO:1901576	Organic substance biosynthetic process	111	763	0.44	4.88e-23	83332.Rv0001,83332.Rv0002,83332.Rv0035,83332.Rv0046c,83332.Rv0070c,83332.Rv0212c,83332.Rv0216,83332.Rv0255c,83332.Rv0489,83332.Rv0503c,83332.Rv0504c,83332.Rv0509,83332.Rv0533c,83332.Rv0637,83332.Rv0641,83332.Rv0642c,83332.Rv0643c,83332.Rv0644c,83332.Rv0684,83332.Rv0685,83332.Rv0701,83332.Rv0702,83332.Rv0703,83332.Rv0704,83332.Rv0706,83332.Rv0707,83332.Rv0719,83332.Rv0720,83332.Rv0721,83332.Rv0772…	dnaA,dnaN,fadD34,ino1,glyA2,nadR,Rv0216,cobQ1,gpm1,cmaA2,Rv0504c,hemA,fabH,hadC,rplA,mmaA4,mmaA3,mmaA2,fusA1,tuf,rplC,rplD,rplW,rplB,rplV,rpsC,rplF,rplR,rpsE,purD,desA1,pks16,rplY,prsA,metB,desA2,metE,mshB,pks4,fadD21,rho,murA,pyrB,dfp,metK,pks5,lgt,rpsA,coaE,infC,argG,pks10,pks11,tyrS,lipJ,pks12,hisG,asnB,glnA1,fabD,kasA,kasB,cdh,cysK1,glyS,uppS,cysH,fadD9,pdxH,dut,suhB,dapB,proS,tsf,rpsB,rpsP,t…
GO Process	GO:1901575	Organic substance catabolic process	29	267	0.31	0.0111	83332.Rv0070c,83332.Rv0183,83332.Rv0489,83332.Rv0727c,83332.Rv0791c,83332.Rv0888,83332.Rv1071c,83332.Rv1341,83332.Rv1391,83332.Rv1592c,83332.Rv1755c,83332.Rv2289,83332.Rv2416c,83332.Rv2457c,83332.Rv2579,83332.Rv2697c,83332.Rv2701c,83332.Rv2780,83332.Rv3137,83332.Rv3332,83332.Rv3389c,83332.Rv3393,83332.Rv3432c,83332.Rv3479,83332.Rv3518c,83332.Rv3522,83332.Rv3545c,83332.Rv3546,83332.Rv3570c	glyA2,Rv0183,gpm1,fucA,Rv0791c,spmT,echA9,Rv1341,dfp,Rv1592c,plcD,cdh,eis,clpX,dhaA,dut,suhB,ald,hisN,nagA,htdY,iunH,gadB,Rv3479,cyp142,ltp4,cyp125,fadA5,hsaA
GO Process	GO:0071704	Organic substance metabolic process	159	1494	0.3	2.27e-24	83332.Rv0001,83332.Rv0002,83332.Rv0035,83332.Rv0046c,83332.Rv0070c,83332.Rv0119,83332.Rv0183,83332.Rv0212c,83332.Rv0216,83332.Rv0255c,83332.Rv0489,83332.Rv0503c,83332.Rv0504c,83332.Rv0509,83332.Rv0533c,83332.Rv0631c,83332.Rv0637,83332.Rv0641,83332.Rv0642c,83332.Rv0643c,83332.Rv0644c,83332.Rv0684,83332.Rv0685,83332.Rv0688,83332.Rv0701,83332.Rv0702,83332.Rv0703,83332.Rv0704,83332.Rv0706,83332.Rv070…	dnaA,dnaN,fadD34,ino1,glyA2,fadD7,Rv0183,nadR,Rv0216,cobQ1,gpm1,cmaA2,Rv0504c,hemA,fabH,recC,hadC,rplA,mmaA4,mmaA3,mmaA2,fusA1,tuf,Rv0688,rplC,rplD,rplW,rplB,rplV,rpsC,rplF,rplR,rpsE,fucA,mapA,purD,Rv0791c,desA1,spmT,galU,ksgA,pks16,rplY,prsA,echA9,metB,desA2,metE,narG,narH,mshB,pks4,fadD21,log,rho,murA,Rv1341,pyrB,dfp,metK,ripA,pks5,Rv1592c,lgt,rpsA,coaE,infC,argG,pks10,pks11,tyrS,Rv1700,plcD,ga…
GO Process	GO:1901566	Organonitrogen compound biosynthetic process	60	444	0.41	3.24e-09	83332.Rv0001,83332.Rv0070c,83332.Rv0212c,83332.Rv0255c,83332.Rv0509,83332.Rv0641,83332.Rv0684,83332.Rv0685,83332.Rv0701,83332.Rv0702,83332.Rv0703,83332.Rv0704,83332.Rv0706,83332.Rv0707,83332.Rv0719,83332.Rv0720,83332.Rv0721,83332.Rv0772,83332.Rv1015c,83332.Rv1017c,83332.Rv1079,83332.Rv1133c,83332.Rv1315,83332.Rv1380,83332.Rv1391,83332.Rv1614,83332.Rv1630,83332.Rv1631,83332.Rv1641,83332.Rv1658,833…	dnaA,glyA2,nadR,cobQ1,hemA,rplA,fusA1,tuf,rplC,rplD,rplW,rplB,rplV,rpsC,rplF,rplR,rpsE,purD,rplY,prsA,metB,metE,murA,pyrB,dfp,lgt,rpsA,coaE,infC,argG,tyrS,lipJ,hisG,asnB,glnA1,cysK1,glyS,cysH,pdxH,dut,dapB,proS,tsf,rpsB,rpsP,Rv2959c,leuC,ilvC,hisN,fbiA,upp,dacB1,Rv3404c,mrsA,rplM,ilvX,coaX,panC,hpt,gltB
GO Process	GO:1901564	Organonitrogen compound metabolic process	77	661	0.34	1.81e-09	83332.Rv0001,83332.Rv0070c,83332.Rv0212c,83332.Rv0255c,83332.Rv0489,83332.Rv0509,83332.Rv0533c,83332.Rv0641,83332.Rv0684,83332.Rv0685,83332.Rv0688,83332.Rv0701,83332.Rv0702,83332.Rv0703,83332.Rv0704,83332.Rv0706,83332.Rv0707,83332.Rv0719,83332.Rv0720,83332.Rv0721,83332.Rv0734,83332.Rv0772,83332.Rv0888,83332.Rv1015c,83332.Rv1017c,83332.Rv1071c,83332.Rv1079,83332.Rv1133c,83332.Rv1205,83332.Rv1315,8…	dnaA,glyA2,nadR,cobQ1,gpm1,hemA,fabH,rplA,fusA1,tuf,Rv0688,rplC,rplD,rplW,rplB,rplV,rpsC,rplF,rplR,rpsE,mapA,purD,spmT,rplY,prsA,echA9,metB,metE,log,murA,pyrB,dfp,ripA,lgt,rpsA,coaE,infC,argG,tyrS,garA,lipJ,dosT,hisG,asnB,glnA1,cysK1,glyS,cysH,clpX,pdxH,dut,recA,dapB,ald,pepR,proS,tsf,rpsB,rpsP,Rv2959c,leuC,ilvC,hisN,mtrA,fbiA,upp,dacB1,iunH,Rv3404c,gadB,mrsA,rplM,ilvX,coaX,panC,hpt,gltB
GO Process	GO:0019637	Organophosphate metabolic process	25	240	0.29	0.0392	83332.Rv0001,83332.Rv0046c,83332.Rv0212c,83332.Rv0489,83332.Rv0533c,83332.Rv0772,83332.Rv0888,83332.Rv1017c,83332.Rv1341,83332.Rv1380,83332.Rv1391,83332.Rv1631,83332.Rv1700,83332.Rv1900c,83332.Rv2289,83332.Rv2357c,83332.Rv2607,83332.Rv2697c,83332.Rv2701c,83332.Rv3048c,83332.Rv3137,83332.Rv3261,83332.Rv3309c,83332.Rv3600c,83332.Rv3624c	dnaA,ino1,nadR,gpm1,fabH,purD,spmT,prsA,Rv1341,pyrB,dfp,coaE,Rv1700,lipJ,cdh,glyS,pdxH,dut,suhB,nrdF2,hisN,fbiA,upp,coaX,hpt
GO Process	GO:0043436	Oxoacid metabolic process	65	435	0.45	1.07e-11	83332.Rv0035,83332.Rv0070c,83332.Rv0119,83332.Rv0216,83332.Rv0255c,83332.Rv0489,83332.Rv0503c,83332.Rv0504c,83332.Rv0509,83332.Rv0533c,83332.Rv0637,83332.Rv0642c,83332.Rv0643c,83332.Rv0644c,83332.Rv0734,83332.Rv0824c,83332.Rv1013,83332.Rv1071c,83332.Rv1079,83332.Rv1094,83332.Rv1133c,83332.Rv1161,83332.Rv1162,83332.Rv1181,83332.Rv1185c,83332.Rv1380,83332.Rv1391,83332.Rv1527c,83332.Rv1658,83332.Rv1…	fadD34,glyA2,fadD7,Rv0216,cobQ1,gpm1,cmaA2,Rv0504c,hemA,fabH,hadC,mmaA4,mmaA3,mmaA2,mapA,desA1,pks16,echA9,metB,desA2,metE,narG,narH,pks4,fadD21,pyrB,dfp,pks5,argG,pks10,pks11,tyrS,lldD2,pks12,hisG,asnB,glnA1,fabD,kasA,kasB,cysK1,glyS,cysH,fadD9,dapB,ald,proS,leuC,ilvC,fadD13,hisN,fbiA,htdY,cmaA1,gadB,ilvX,fadD19,ltp4,fadA5,hsaA,panC,pks13,pks2,fadD23,gltB
GO Process	GO:0009273	Peptidoglycan-based cell wall biogenesis	21	98	0.61	1.93e-05	83332.Rv0503c,83332.Rv0642c,83332.Rv0643c,83332.Rv0644c,83332.Rv1315,83332.Rv1527c,83332.Rv1660,83332.Rv1665,83332.Rv2048c,83332.Rv2246,83332.Rv2928,83332.Rv2959c,83332.Rv3330,83332.Rv3392c,83332.Rv3441c,83332.Rv3515c,83332.Rv3800c,83332.Rv3808c,83332.Rv3809c,83332.Rv3825c,83332.Rv3826	cmaA2,mmaA4,mmaA3,mmaA2,murA,pks5,pks10,pks11,pks12,kasB,tesA,Rv2959c,dacB1,cmaA1,mrsA,fadD19,pks13,glfT2,glf,pks2,fadD23
GO Process	GO:0006796	Phosphate-containing compound metabolic process	34	312	0.31	0.0037	83332.Rv0001,83332.Rv0046c,83332.Rv0212c,83332.Rv0489,83332.Rv0533c,83332.Rv0772,83332.Rv0888,83332.Rv1017c,83332.Rv1286,83332.Rv1341,83332.Rv1380,83332.Rv1391,83332.Rv1631,83332.Rv1700,83332.Rv1827,83332.Rv1900c,83332.Rv2027c,83332.Rv2289,83332.Rv2357c,83332.Rv2419c,83332.Rv2607,83332.Rv2697c,83332.Rv2701c,83332.Rv3048c,83332.Rv3137,83332.Rv3168,83332.Rv3246c,83332.Rv3261,83332.Rv3309c,83332.Rv3…	dnaA,ino1,nadR,gpm1,fabH,purD,spmT,prsA,cysN,Rv1341,pyrB,dfp,coaE,Rv1700,garA,lipJ,dosT,cdh,glyS,gpgP,pdxH,dut,suhB,nrdF2,hisN,Rv3168,mtrA,fbiA,upp,coaX,hpt,ppa,Rv3705c,Rv3817
GO Process	GO:0006793	Phosphorus metabolic process	38	321	0.35	0.00027	83332.Rv0001,83332.Rv0046c,83332.Rv0212c,83332.Rv0489,83332.Rv0533c,83332.Rv0772,83332.Rv0888,83332.Rv0993,83332.Rv1017c,83332.Rv1286,83332.Rv1315,83332.Rv1341,83332.Rv1380,83332.Rv1391,83332.Rv1631,83332.Rv1700,83332.Rv1827,83332.Rv1900c,83332.Rv2027c,83332.Rv2289,83332.Rv2357c,83332.Rv2419c,83332.Rv2607,83332.Rv2697c,83332.Rv2701c,83332.Rv3048c,83332.Rv3137,83332.Rv3168,83332.Rv3246c,83332.Rv32…	dnaA,ino1,nadR,gpm1,fabH,purD,spmT,galU,prsA,cysN,murA,Rv1341,pyrB,dfp,coaE,Rv1700,garA,lipJ,dosT,cdh,glyS,gpgP,pdxH,dut,suhB,nrdF2,hisN,Rv3168,mtrA,fbiA,upp,mrsA,coaX,hpt,ppa,Rv3705c,glfT2,Rv3817
GO Process	GO:0044238	Primary metabolic process	150	1342	0.32	5.27e-24	83332.Rv0001,83332.Rv0002,83332.Rv0035,83332.Rv0046c,83332.Rv0070c,83332.Rv0119,83332.Rv0183,83332.Rv0212c,83332.Rv0216,83332.Rv0255c,83332.Rv0489,83332.Rv0503c,83332.Rv0504c,83332.Rv0509,83332.Rv0533c,83332.Rv0631c,83332.Rv0637,83332.Rv0641,83332.Rv0642c,83332.Rv0643c,83332.Rv0644c,83332.Rv0684,83332.Rv0685,83332.Rv0688,83332.Rv0701,83332.Rv0702,83332.Rv0703,83332.Rv0704,83332.Rv0706,83332.Rv070…	dnaA,dnaN,fadD34,ino1,glyA2,fadD7,Rv0183,nadR,Rv0216,cobQ1,gpm1,cmaA2,Rv0504c,hemA,fabH,recC,hadC,rplA,mmaA4,mmaA3,mmaA2,fusA1,tuf,Rv0688,rplC,rplD,rplW,rplB,rplV,rpsC,rplF,rplR,rpsE,fucA,mapA,purD,desA1,spmT,galU,ksgA,pks16,rplY,prsA,echA9,metB,desA2,metE,pks4,fadD21,rho,murA,Rv1341,pyrB,dfp,ripA,pks5,Rv1592c,lgt,rpsA,coaE,infC,argG,pks10,pks11,tyrS,Rv1700,plcD,garA,lipJ,dosT,pks12,hisG,asnB,gln…
GO Process	GO:0019538	Protein metabolic process	35	262	0.4	6.18e-05	83332.Rv0641,83332.Rv0684,83332.Rv0685,83332.Rv0688,83332.Rv0701,83332.Rv0702,83332.Rv0703,83332.Rv0704,83332.Rv0706,83332.Rv0707,83332.Rv0719,83332.Rv0720,83332.Rv0721,83332.Rv0734,83332.Rv1015c,83332.Rv1477,83332.Rv1614,83332.Rv1630,83332.Rv1641,83332.Rv1689,83332.Rv1827,83332.Rv2027c,83332.Rv2357c,83332.Rv2457c,83332.Rv2737c,83332.Rv2782c,83332.Rv2845c,83332.Rv2889c,83332.Rv2890c,83332.Rv2909c…	rplA,fusA1,tuf,Rv0688,rplC,rplD,rplW,rplB,rplV,rpsC,rplF,rplR,rpsE,mapA,rplY,ripA,lgt,rpsA,infC,tyrS,garA,dosT,glyS,clpX,recA,pepR,proS,tsf,rpsB,rpsP,Rv2959c,mtrA,dacB1,Rv3404c,rplM
GO Process	GO:0051246	Regulation of protein metabolic process	8	38	0.6	0.0451	83332.Rv0641,83332.Rv0684,83332.Rv0685,83332.Rv1641,83332.Rv2220,83332.Rv2889c,83332.Rv3241c,83332.Rv3443c	rplA,fusA1,tuf,infC,glnA1,tsf,hpf,rplM
GO Process	GO:0009628	Response to abiotic stimulus	18	97	0.54	0.0006	83332.Rv0384c,83332.Rv0503c,83332.Rv0560c,83332.Rv0685,83332.Rv1161,83332.Rv1162,83332.Rv2027c,83332.Rv2246,83332.Rv2503c,83332.Rv2737c,83332.Rv2780,83332.Rv3084,83332.Rv3088,83332.Rv3089,83332.Rv3480c,83332.Rv3487c,83332.Rv3597c,83332.Rv3734c	clpB,cmaA2,Rv0560c,tuf,narG,narH,dosT,kasB,scoB,recA,ald,lipR,tgs4,fadD13,Rv3480c,lipF,lsr2,tgs2
GO Process	GO:0042221	Response to chemical	26	206	0.38	0.0032	83332.Rv0002,83332.Rv0560c,83332.Rv0685,83332.Rv0888,83332.Rv1161,83332.Rv1162,83332.Rv1218c,83332.Rv1285,83332.Rv1286,83332.Rv1636,83332.Rv1900c,83332.Rv1908c,83332.Rv2027c,83332.Rv2416c,83332.Rv2521,83332.Rv2579,83332.Rv2737c,83332.Rv3088,83332.Rv3168,83332.Rv3480c,83332.Rv3522,83332.Rv3546,83332.Rv3597c,83332.Rv3617,83332.Rv3734c,83332.Rv3817	dnaN,Rv0560c,tuf,spmT,narG,narH,Rv1218c,cysD,cysN,TB15.3,lipJ,katG,dosT,eis,bcp,dhaA,recA,tgs4,Rv3168,Rv3480c,ltp4,fadA5,lsr2,ephA,tgs2,Rv3817
GO Process	GO:0036293	Response to decreased oxygen levels	12	60	0.58	0.0075	83332.Rv0503c,83332.Rv0560c,83332.Rv0685,83332.Rv1161,83332.Rv1162,83332.Rv2027c,83332.Rv2246,83332.Rv2503c,83332.Rv2780,83332.Rv3088,83332.Rv3480c,83332.Rv3734c	cmaA2,Rv0560c,tuf,narG,narH,dosT,kasB,scoB,ald,tgs4,Rv3480c,tgs2
GO Process	GO:0009605	Response to external stimulus	24	232	0.29	0.0496	83332.Rv0169,83332.Rv0212c,83332.Rv0503c,83332.Rv0560c,83332.Rv0824c,83332.Rv1285,83332.Rv1286,83332.Rv1860,83332.Rv2416c,83332.Rv2528c,83332.Rv2557,83332.Rv2592c,83332.Rv2593c,83332.Rv2737c,83332.Rv2818c,83332.Rv2824c,83332.Rv2895c,83332.Rv2928,83332.Rv3237c,83332.Rv3487c,83332.Rv3515c,83332.Rv3516,83332.Rv3597c,83332.Rv3825c	mce1A,nadR,cmaA2,Rv0560c,desA1,cysD,cysN,apa,eis,mrr,Rv2557,ruvB,ruvA,recA,csm6,cas6,viuB,tesA,Rv3237c,lipF,fadD19,echA19,lsr2,pks2
GO Process	GO:0001666	Response to hypoxia	10	57	0.52	0.0431	83332.Rv0503c,83332.Rv0560c,83332.Rv0685,83332.Rv2027c,83332.Rv2246,83332.Rv2503c,83332.Rv2780,83332.Rv3088,83332.Rv3480c,83332.Rv3734c	cmaA2,Rv0560c,tuf,dosT,kasB,scoB,ald,tgs4,Rv3480c,tgs2
GO Process	GO:0070482	Response to oxygen levels	13	62	0.6	0.0031	83332.Rv0503c,83332.Rv0560c,83332.Rv0685,83332.Rv1161,83332.Rv1162,83332.Rv2027c,83332.Rv2246,83332.Rv2503c,83332.Rv2780,83332.Rv3088,83332.Rv3480c,83332.Rv3597c,83332.Rv3734c	cmaA2,Rv0560c,tuf,narG,narH,dosT,kasB,scoB,ald,tgs4,Rv3480c,lsr2,tgs2
GO Process	GO:0050896	Response to stimulus	56	558	0.28	0.00015	83332.Rv0002,83332.Rv0169,83332.Rv0212c,83332.Rv0384c,83332.Rv0503c,83332.Rv0560c,83332.Rv0631c,83332.Rv0685,83332.Rv0824c,83332.Rv0888,83332.Rv1161,83332.Rv1162,83332.Rv1218c,83332.Rv1285,83332.Rv1286,83332.Rv1636,83332.Rv1700,83332.Rv1860,83332.Rv1900c,83332.Rv1908c,83332.Rv2027c,83332.Rv2246,83332.Rv2416c,83332.Rv2503c,83332.Rv2521,83332.Rv2528c,83332.Rv2557,83332.Rv2579,83332.Rv2592c,83332.Rv…	dnaN,mce1A,nadR,clpB,cmaA2,Rv0560c,recC,tuf,desA1,spmT,narG,narH,Rv1218c,cysD,cysN,TB15.3,Rv1700,apa,lipJ,katG,dosT,kasB,eis,scoB,bcp,mrr,Rv2557,dhaA,ruvB,ruvA,suhB,recA,ald,csm6,cas6,viuB,tesA,mutT1,lipR,tgs4,fadD13,Rv3168,Rv3237c,mtrA,Rv3480c,lipF,fadD19,echA19,ltp4,fadA5,lsr2,ephA,lpqG,tgs2,Rv3817,pks2
GO Process	GO:0006950	Response to stress	30	221	0.41	0.00027	83332.Rv0384c,83332.Rv0503c,83332.Rv0560c,83332.Rv0631c,83332.Rv0685,83332.Rv1285,83332.Rv1286,83332.Rv1700,83332.Rv1860,83332.Rv1908c,83332.Rv2027c,83332.Rv2246,83332.Rv2503c,83332.Rv2521,83332.Rv2528c,83332.Rv2557,83332.Rv2592c,83332.Rv2593c,83332.Rv2737c,83332.Rv2780,83332.Rv2818c,83332.Rv2824c,83332.Rv2895c,83332.Rv2985,83332.Rv3088,83332.Rv3480c,83332.Rv3597c,83332.Rv3623,83332.Rv3734c,83332…	clpB,cmaA2,Rv0560c,recC,tuf,cysD,cysN,Rv1700,apa,katG,dosT,kasB,scoB,bcp,mrr,Rv2557,ruvB,ruvA,recA,ald,csm6,cas6,viuB,mutT1,tgs4,Rv3480c,lsr2,lpqG,tgs2,pks2
GO Process	GO:0044283	Small molecule biosynthetic process	53	303	0.52	1.59e-11	83332.Rv0035,83332.Rv0046c,83332.Rv0070c,83332.Rv0216,83332.Rv0255c,83332.Rv0489,83332.Rv0503c,83332.Rv0504c,83332.Rv0533c,83332.Rv0637,83332.Rv0642c,83332.Rv0643c,83332.Rv0644c,83332.Rv0824c,83332.Rv1013,83332.Rv1079,83332.Rv1094,83332.Rv1133c,83332.Rv1181,83332.Rv1185c,83332.Rv1527c,83332.Rv1658,83332.Rv1660,83332.Rv1665,83332.Rv2048c,83332.Rv2121c,83332.Rv2201,83332.Rv2220,83332.Rv2243,83332.R…	fadD34,ino1,glyA2,Rv0216,cobQ1,gpm1,cmaA2,Rv0504c,fabH,hadC,mmaA4,mmaA3,mmaA2,desA1,pks16,metB,desA2,metE,pks4,fadD21,pks5,argG,pks10,pks11,pks12,hisG,asnB,glnA1,fabD,kasA,kasB,cysK1,uppS,cysH,fadD9,pdxH,suhB,dapB,leuC,ilvC,fadD13,hisN,gpm2,fbiA,cmaA1,ilvX,fadD19,panC,hpt,pks13,pks2,fadD23,gltB
GO Process	GO:0044281	Small molecule metabolic process	95	682	0.42	3.06e-17	83332.Rv0001,83332.Rv0035,83332.Rv0046c,83332.Rv0070c,83332.Rv0119,83332.Rv0212c,83332.Rv0216,83332.Rv0255c,83332.Rv0489,83332.Rv0503c,83332.Rv0504c,83332.Rv0509,83332.Rv0533c,83332.Rv0637,83332.Rv0642c,83332.Rv0643c,83332.Rv0644c,83332.Rv0727c,83332.Rv0734,83332.Rv0772,83332.Rv0824c,83332.Rv0993,83332.Rv1013,83332.Rv1017c,83332.Rv1071c,83332.Rv1079,83332.Rv1094,83332.Rv1133c,83332.Rv1161,83332.R…	dnaA,fadD34,ino1,glyA2,fadD7,nadR,Rv0216,cobQ1,gpm1,cmaA2,Rv0504c,hemA,fabH,hadC,mmaA4,mmaA3,mmaA2,fucA,mapA,purD,desA1,galU,pks16,prsA,echA9,metB,desA2,metE,narG,narH,pks4,fadD21,murA,Rv1341,pyrB,dfp,metK,pks5,coaE,argG,pks10,pks11,tyrS,Rv1700,lldD2,lipJ,pks12,hisG,asnB,glnA1,fabD,kasA,kasB,cysK1,glyS,uppS,cysH,fadD9,pdxH,dut,suhB,dapB,ald,proS,leuC,ilvC,nrdF2,tgs4,fadD13,hisN,gpm2,fbiA,upp,htdY…
GO Process	GO:0000103	Sulfate assimilation	4	6	1.1	0.029	83332.Rv1285,83332.Rv1286,83332.Rv2391,83332.Rv2392	cysD,cysN,sirA,cysH
GO Process	GO:0006790	Sulfur compound metabolic process	16	102	0.47	0.0084	83332.Rv0503c,83332.Rv0533c,83332.Rv0734,83332.Rv1079,83332.Rv1133c,83332.Rv1170,83332.Rv1285,83332.Rv1286,83332.Rv1392,83332.Rv2334,83332.Rv2391,83332.Rv2392,83332.Rv2959c,83332.Rv3137,83332.Rv3392c,83332.Rv3826	cmaA2,fabH,mapA,metB,metE,mshB,cysD,cysN,metK,cysK1,sirA,cysH,Rv2959c,hisN,cmaA1,fadD23
GO Process	GO:0006412	Translation	23	100	0.64	1.9e-06	83332.Rv0641,83332.Rv0684,83332.Rv0685,83332.Rv0701,83332.Rv0702,83332.Rv0703,83332.Rv0704,83332.Rv0706,83332.Rv0707,83332.Rv0719,83332.Rv0720,83332.Rv0721,83332.Rv1015c,83332.Rv1630,83332.Rv1641,83332.Rv1689,83332.Rv2357c,83332.Rv2845c,83332.Rv2889c,83332.Rv2890c,83332.Rv2909c,83332.Rv3404c,83332.Rv3443c	rplA,fusA1,tuf,rplC,rplD,rplW,rplB,rplV,rpsC,rplF,rplR,rpsE,rplY,rpsA,infC,tyrS,glyS,proS,tsf,rpsB,rpsP,Rv3404c,rplM

## Sheet: IlaE_downregulated_Revigo
TermID	Name	Value	LogSize	Frequency	Uniqueness	Dispensability	PC_0	PC_1	Representative
GO:0000103	sulfate assimilation	-1.5376	0.845098	0.268577	0.911657	0.0827352	1.67409	8.85453	null
GO:0005975	carbohydrate metabolic process	-1.31876	2.15836	6.40107	0.911334	0.114874	-0.414975	-5.81277	null
GO:0006412	translation	-5.72125	2.01284	4.5658	0.763769	0.262296	6.42799	2.82217	null
GO:0010467	gene expression	-4.80688	2.33646	9.66876	0.745778	0.604966	null	null	6412
GO:0006520	amino acid metabolic process	-3.03621	2.26245	8.14682	0.907022	0.12132	1.22274	-6.19071	null
GO:0006629	lipid metabolic process	-7.70997	2.57287	16.6965	0.891261	0.105113	7.23343	-2.09855	null
GO:0006633	fatty acid biosynthetic process	-9.39041	1.94939	3.93912	0.672392	0	4.60975	4.45485	null
GO:0006631	fatty acid metabolic process	-7.75449	2.18469	6.80394	0.689848	0.757147	null	null	6633
GO:0008610	lipid biosynthetic process	-8.52724	2.34635	9.89257	0.788261	0.537569	null	null	6633
GO:0008652	amino acid biosynthetic process	-1.30627	2.05308	5.01343	0.832465	0.801304	null	null	6633
GO:0019752	carboxylic acid metabolic process	-10.699	2.56585	16.4279	0.695694	0.580959	null	null	6633
GO:0032787	monocarboxylic acid metabolic process	-6.97881	2.3075	9.04208	0.725536	0.695637	null	null	6633
GO:0043436	oxoacid metabolic process	-10.9706	2.5832	17.0994	0.694359	0.811478	null	null	6633
GO:0044255	cellular lipid metabolic process	-7.70997	2.41497	11.5936	0.78404	0.667445	null	null	6633
GO:0046394	carboxylic acid biosynthetic process	-10.2628	2.35984	10.2059	0.658253	0.763408	null	null	6633
GO:0071768	mycolic acid biosynthetic process	-2.07572	1.17609	0.626679	0.624667	0.709222	null	null	6633
GO:0071770	DIM/DIP cell wall layer assembly	-1.88606	1.38021	1.02954	0.834215	0.748925	null	null	6633
GO:0072330	monocarboxylic acid biosynthetic process	-8.8041	2.01284	4.5658	0.693065	0.691678	null	null	6633
GO:1901605	alpha-amino acid metabolic process	-1.98297	2.15534	6.35631	0.696673	0.641894	null	null	6633
GO:0006790	sulfur compound metabolic process	-2.07572	1.97772	4.2077	0.870157	0.118292	2.09515	0.988417	null
GO:0006793	phosphorus metabolic process	-3.56864	2.48144	13.5184	0.837581	0.146509	7.80696	1.18242	null
GO:0006950	response to stress	-3.56864	2.35793	10.1611	0.900474	0.370261	-2.99726	5.81265	null
GO:0007154	cell communication	-1.75696	1.76343	2.55148	0.956475	0.0386143	-6.68051	2.56084	null
GO:0008152	metabolic process	-31.8697	3.17522	66.9651	1	0	-6.78108	0.730317	null
GO:0009056	catabolic process	-2.36653	2.42651	11.9069	0.923457	0.0926816	0.011398	8.7409	null
GO:0009058	biosynthetic process	-23.7905	2.94151	39.0779	0.894313	0.158631	4.45564	-4.62751	null
GO:0009059	macromolecule biosynthetic process	-9.55284	2.51587	14.6374	0.742552	0.387617	5.83892	2.8352	null
GO:0009165	nucleotide biosynthetic process	-1.45842	2.00432	4.47628	0.69938	0.276115	3.99925	4.98488	null
GO:0006753	nucleoside phosphate metabolic process	-1.6216	2.18752	6.8487	0.707848	0.793817	null	null	9165
GO:0006796	phosphate-containing compound metabolic process	-2.4318	2.46538	13.026	0.776967	0.672784	null	null	9165
GO:0009117	nucleotide metabolic process	-1.36552	2.18184	6.75918	0.706751	0.861107	null	null	9165
GO:0019637	organophosphate metabolic process	-1.40671	2.39445	11.0564	0.783655	0.816248	null	null	9165
GO:0009605	response to external stimulus	-1.30452	2.29003	8.68397	0.902911	0.425328	-3.37513	6.29097	null
GO:0009628	response to abiotic stimulus	-3.22185	1.98677	4.29722	0.912745	0	-4.10369	5.69852	null
GO:0009987	cellular process	-26.6402	3.17464	66.8756	1	0	-4.1709	-4.48285	null
GO:0019538	protein metabolic process	-4.20901	2.42325	11.8174	0.83936	0.478472	6.70329	0.246878	null
GO:0042221	response to chemical	-2.49485	2.31597	9.22113	0.90199	0.430794	-3.6285	5.95241	null
GO:0043170	macromolecule metabolic process	-5.8729	2.77525	26.6338	0.905906	0.129016	1.37324	-3.2911	null
GO:0043603	amide metabolic process	-5.72125	1.69897	2.19338	0.944797	0.037559	-5.48872	-3.0287	null
GO:0043604	amide biosynthetic process	-5.09637	1.44716	1.20859	0.892001	0.149657	5.59067	6.44001	null
GO:0044237	cellular metabolic process	-25.7258	3.03222	48.1647	0.862701	0.0672282	3.59776	-3.32944	null
GO:0044238	primary metabolic process	-23.2782	3.09447	55.5953	0.8811	0.201075	4.57526	-3.05182	null
GO:0044249	cellular biosynthetic process	-22.6459	2.83251	30.3939	0.736897	0.267648	4.98973	2.74931	null
GO:0044281	small molecule metabolic process	-16.5143	2.81358	29.0958	0.903463	0.134821	3.17181	-5.60114	null
GO:0044283	small molecule biosynthetic process	-10.7986	2.47712	13.3841	0.749353	0.357543	4.64251	5.27392	null
GO:0044419	biological process involved in interspecies interaction between organisms	-1.54516	2.49415	13.9212	1	0	-2.31697	-5.79122	null
GO:0050896	response to stimulus	-3.82391	2.76118	25.7833	1	0	-6.35821	-1.18957	null
GO:0051246	regulation of protein metabolic process	-1.34582	1.5682	1.61146	1	0	-2.18322	-3.89179	null
GO:0051716	cellular response to stimulus	-2.74473	2.34044	9.75828	0.851505	0.436081	-3.26257	5.48227	null
GO:0055086	nucleobase-containing small molecule metabolic process	-2.56864	2.26482	8.19158	0.788135	0.458074	2.74298	6.5468	null
GO:0034654	nucleobase-containing compound biosynthetic process	-1.8041	2.33041	9.53447	0.792824	0.529455	null	null	55086
GO:0070482	response to oxygen levels	-2.50864	1.79934	2.77529	0.886502	0.298877	-2.74111	6.44759	null
GO:0001666	response to hypoxia	-1.36552	1.77085	2.59624	0.874695	0.95894	null	null	70482
GO:0036293	response to decreased oxygen levels	-2.12494	1.78533	2.68577	0.883283	0.836467	null	null	70482
GO:0070887	cellular response to chemical stimulus	-1.83863	1.81291	2.86482	0.868105	0.300293	-3.83153	5.07688	null
GO:0033554	cellular response to stress	-1.8041	2.11727	5.81916	0.845348	0.656582	null	null	70887
GO:0071554	cell wall organization or biogenesis	-4.61618	2.09342	5.50582	0.950517	0.0734298	-3.99634	-1.61065	null
GO:0071766	Actinobacterium-type cell wall biogenesis	-5.22185	1.74819	2.46195	0.820076	0.0384155	-1.17106	-1.56445	null
GO:0009273	peptidoglycan-based cell wall biogenesis	-4.71444	1.95904	4.02865	0.809401	0.881039	null	null	71766
GO:0016043	cellular component organization	-2.284	2.26482	8.19158	0.82669	0.786192	null	null	71766
GO:0022607	cellular component assembly	-1.5376	1.86923	3.26768	0.831364	0.687004	null	null	71766
GO:0044038	cell wall macromolecule biosynthetic process	-1.6216	1.72428	2.32766	0.682908	0.816291	null	null	71766
GO:0044085	cellular component biogenesis	-3.65758	2.20683	7.16204	0.829937	0.637133	null	null	71766
GO:0071840	cellular component organization or biogenesis	-4.54516	2.37107	10.4745	0.944106	0.0892414	-1.72869	0.868464	null
GO:1901135	carbohydrate derivative metabolic process	-1.75696	2.42975	11.9964	0.923324	0.0929251	-4.76006	0.793959	null
GO:1901137	carbohydrate derivative biosynthetic process	-1.52724	2.28103	8.50492	0.851101	0.313194	6.18267	4.82558	null
GO:1901564	organonitrogen compound metabolic process	-8.74232	2.82543	29.9015	0.902682	0.136721	6.0632	-4.01112	null
GO:1901566	organonitrogen compound biosynthetic process	-8.48945	2.64345	19.6509	0.800172	0.406272	5.88138	3.50267	null

## Sheet: IlaE_upregulated_String
#category	term ID	term description	observed gene count	background gene count	strength	false discovery rate	matching proteins in your network (IDs)	matching proteins in your network (labels)
GO Process	GO:0006950	Response to stress	19	221	0.59	0.0011	83332.Rv0182c,83332.Rv0251c,83332.Rv0384c,83332.Rv0465c,83332.Rv0938,83332.Rv1173,83332.Rv1253,83332.Rv1316c,83332.Rv1420,83332.Rv1633,83332.Rv2285,83332.Rv2428,83332.Rv2484c,83332.Rv2583c,83332.Rv2629,83332.Rv2710,83332.Rv2745c,83332.Rv3715c,83332.Rv3765c	sigG,hsp,clpB,ramB,ligD,fbiC,deaD,ogt,uvrC,uvrB,Rv2285,ahpC,Rv2484c,relA,Rv2629,sigB,clgR,recR,tcrX
GO Process	GO:0050896	Response to stimulus	30	558	0.39	0.0017	83332.Rv0146,83332.Rv0182c,83332.Rv0190,83332.Rv0251c,83332.Rv0264c,83332.Rv0384c,83332.Rv0430,83332.Rv0465c,83332.Rv0938,83332.Rv0967,83332.Rv1173,83332.Rv1253,83332.Rv1316c,83332.Rv1420,83332.Rv1633,83332.Rv2285,83332.Rv2428,83332.Rv2430c,83332.Rv2484c,83332.Rv2496c,83332.Rv2583c,83332.Rv2629,83332.Rv2710,83332.Rv2745c,83332.Rv2930,83332.Rv3645,83332.Rv3715c,83332.Rv3759c,83332.Rv3764c,83332.Rv…	Rv0146,sigG,ricR,hsp,Rv0264c,clpB,Rv0430,ramB,ligD,csoR,fbiC,deaD,ogt,uvrC,uvrB,Rv2285,ahpC,PPE41,Rv2484c,bkdB,relA,Rv2629,sigB,clgR,fadD26,Rv3645,recR,proX,tcrY,tcrX
GO Process	GO:0008152	Metabolic process	59	1630	0.21	0.0011	83332.Rv0146,83332.Rv0182c,83332.Rv0220,83332.Rv0274,83332.Rv0337c,83332.Rv0392c,83332.Rv0483,83332.Rv0486,83332.Rv0558,83332.Rv0563,83332.Rv0659c,83332.Rv0724,83332.Rv0726c,83332.Rv0778,83332.Rv0893c,83332.Rv0938,83332.Rv1173,83332.Rv1207,83332.Rv1253,83332.Rv1262c,83332.Rv1316c,83332.Rv1330c,83332.Rv1331,83332.Rv1335,83332.Rv1416,83332.Rv1420,83332.Rv1521,83332.Rv1569,83332.Rv1633,83332.Rv1854c…	Rv0146,sigG,lipC,Rv0274,aspC,ndhA,lprQ,mshA,menH,htpX,mazF2,sppA,Rv0726c,cyp126,Rv0893c,ligD,fbiC,folP2,deaD,Rv1262c,ogt,pncB1,clpS,cysO,ribH,uvrC,fadD25,bioF1,uvrB,ndh,Rv2037c,rsmH,Rv2182c,Rv2285,Rv2484c,bkdB,bkdA,relA,pimA,Rv2659c,sigB,fadD26,ppsA,ppsB,fbiD,TB22.2,nrdI,pmmA,rmlD,amiB1,Rv3399,vapC47,cut4,Rv3645,recR,tcrY,Rv3767c,Rv3814c,Rv3815c
GO Process	GO:0009987	Cellular process	58	1738	0.18	0.0156	83332.Rv0027,83332.Rv0092,83332.Rv0182c,83332.Rv0220,83332.Rv0251c,83332.Rv0274,83332.Rv0384c,83332.Rv0483,83332.Rv0486,83332.Rv0558,83332.Rv0659c,83332.Rv0724,83332.Rv0938,83332.Rv1173,83332.Rv1207,83332.Rv1253,83332.Rv1262c,83332.Rv1316c,83332.Rv1330c,83332.Rv1335,83332.Rv1416,83332.Rv1420,83332.Rv1521,83332.Rv1569,83332.Rv1633,83332.Rv1854c,83332.Rv2094c,83332.Rv2165c,83332.Rv2182c,83332.Rv228…	Rv0027,ctpA,sigG,lipC,hsp,Rv0274,clpB,lprQ,mshA,menH,mazF2,sppA,ligD,fbiC,folP2,deaD,Rv1262c,ogt,pncB1,cysO,ribH,uvrC,fadD25,bioF1,uvrB,ndh,tatA,rsmH,Rv2182c,Rv2285,ahpC,Rv2484c,bkdB,bkdA,relA,yajC,pimA,Rv2659c,sigB,clgR,ffh,fadD26,ppsA,ppsB,fbiD,pmmA,rmlD,amiB1,vapC47,Rv3645,recR,proX,tcrY,tcrX,Rv3814c,Rv3815c,Rv3856c,esxB

## Sheet: IlaE_upregulated_Revigo
TermID	Name	Value	LogSize	Frequency	Uniqueness	Dispensability	PC_0	PC_1	Representative
GO:0006950	response to stress	-2.95861	2.35793	10.1611	1	0	1.63687	6.46222	null
GO:0008152	metabolic process	-2.95861	3.17522	66.9651	1	0	-1.03733	-5.30893	null
GO:0009987	cellular process	-1.80688	3.17464	66.8756	1	0	6.18532	-0.760386	null
GO:0050896	response to stimulus	-2.76955	2.76118	25.7833	1	0	-5.58579	1.91379	null

## Sheet: Ecu _downregulated_String
#category	term ID	term description	observed gene count	background gene count	strength	false discovery rate	matching proteins in your network (IDs)	matching proteins in your network (labels)
GO Process	GO:0043604	Amide biosynthetic process	21	139	0.32	0.0427	83332.Rv0056,83332.Rv0703,83332.Rv0706,83332.Rv0715,83332.Rv0716,83332.Rv0719,83332.Rv0720,83332.Rv0722,83332.Rv1015c,83332.Rv1347c,83332.Rv1524,83332.Rv1589,83332.Rv1641,83332.Rv2441c,83332.Rv2842c,83332.Rv2890c,83332.Rv2909c,83332.Rv3009c,83332.Rv3443c,83332.Rv3456c,83332.Rv3606c	rplI,rplW,rplV,rplX,rplE,rplF,rplR,rpmD,rplY,mbtK,Rv1524,bioB,infC,rpmA,rimP,rpsB,rpsP,gatB,rplM,rplQ,folK
GO Process	GO:0051701	Biological process involved in interaction with host	41	270	0.33	0.001	83332.Rv0019c,83332.Rv0137c,83332.Rv0169,83332.Rv0170,83332.Rv0171,83332.Rv0172,83332.Rv0173,83332.Rv0174,83332.Rv0176,83332.Rv0177,83332.Rv0386,83332.Rv0392c,83332.Rv0410c,83332.Rv0503c,83332.Rv0824c,83332.Rv0899,83332.Rv0986,83332.Rv1755c,83332.Rv1860,83332.Rv1956,83332.Rv1959c,83332.Rv2051c,83332.Rv2206,83332.Rv2234,83332.Rv2284,83332.Rv2301,83332.Rv2349c,83332.Rv2350c,83332.Rv2351c,83332.Rv29…	fhaB,msrA,mce1A,mce1B,mce1C,mce1D,lprK,mce1F,Rv0176,Rv0177,Rv0386,ndhA,pknG,cmaA2,desA1,ompA,Rv0986,plcD,apa,higA,parE1,ppm1,Rv2206,ptpA,lipM,cut2,plcC,plcB,plcA,glnB,mymA,lipR,tgs4,PPE52,Rv3237c,mtrA,PPE60,lipF,fadD19,cyp125,espC
GO Process	GO:0044419	Biological process involved in interspecies interaction between organisms	44	287	0.33	0.00045	83332.Rv0019c,83332.Rv0137c,83332.Rv0169,83332.Rv0170,83332.Rv0171,83332.Rv0172,83332.Rv0173,83332.Rv0174,83332.Rv0176,83332.Rv0177,83332.Rv0386,83332.Rv0392c,83332.Rv0410c,83332.Rv0503c,83332.Rv0824c,83332.Rv0888,83332.Rv0899,83332.Rv0986,83332.Rv1755c,83332.Rv1860,83332.Rv1956,83332.Rv1959c,83332.Rv2051c,83332.Rv2206,83332.Rv2234,83332.Rv2284,83332.Rv2301,83332.Rv2349c,83332.Rv2350c,83332.Rv235…	fhaB,msrA,mce1A,mce1B,mce1C,mce1D,lprK,mce1F,Rv0176,Rv0177,Rv0386,ndhA,pknG,cmaA2,desA1,spmT,ompA,Rv0986,plcD,apa,higA,parE1,ppm1,Rv2206,ptpA,lipM,cut2,plcC,plcB,plcA,mrr,csm3,glnB,mymA,lipR,tgs4,PPE52,Rv3237c,mtrA,PPE60,lipF,fadD19,cyp125,espC
GO Process	GO:0065007	Biological regulation	66	514	0.25	0.00043	83332.Rv0011c,83332.Rv0016c,83332.Rv0050,83332.Rv0078,83332.Rv0092,83332.Rv0135c,83332.Rv0206c,83332.Rv0386,83332.Rv0410c,83332.Rv0456c,83332.Rv0474,83332.Rv0530,83332.Rv0560c,83332.Rv0602c,83332.Rv0825c,83332.Rv0890c,83332.Rv1033c,83332.Rv1103c,83332.Rv1205,83332.Rv1241,83332.Rv1264,83332.Rv1320c,83332.Rv1398c,83332.Rv1423,83332.Rv1534,83332.Rv1608c,83332.Rv1641,83332.Rv1657,83332.Rv1698,83332.R…	crgA,pbpA,ponA1,Rv0078,ctpA,Rv0135c,mmpL3,Rv0386,pknG,echA2,Rv0474,Rv0530,Rv0560c,tcrA,Rv0825c,Rv0890c,trcR,mazE3,log,vapB33,Rv1264,Rv1320c,vapB10,whiA,Rv1534,bcpB,infC,argR,mctB,Rv1773c,higA,parD1,mce3R,cmtR,dosT,Rv2034,rbpA,ftsZ,murG,ptpA,smtB,clpX,ldtB,nusB,lexA,dacB2,glnB,Rv3050c,Rv3058c,Rv3198A,Rv3208,hpf,mtrA,dacB1,vapC46,vapB47,rplM,kstR,Rv3575c,lsr2,cspA,vapC48,Rv3788,Rv3860,parB,Rv3920c
GO Process	GO:0009058	Biosynthetic process	106	779	0.28	1.18e-08	83332.Rv0013,83332.Rv0016c,83332.Rv0035,83332.Rv0046c,83332.Rv0050,83332.Rv0056,83332.Rv0070c,83332.Rv0130,83332.Rv0206c,83332.Rv0216,83332.Rv0221,83332.Rv0386,83332.Rv0503c,83332.Rv0509,83332.Rv0558,83332.Rv0564c,83332.Rv0567,83332.Rv0644c,83332.Rv0703,83332.Rv0706,83332.Rv0715,83332.Rv0716,83332.Rv0719,83332.Rv0720,83332.Rv0722,83332.Rv0772,83332.Rv0824c,83332.Rv0993,83332.Rv1002c,83332.Rv1013,…	trpG,pbpA,fadD34,ino1,ponA1,rplI,glyA2,htdZ,mmpL3,Rv0216,Rv0221,Rv0386,cmaA2,hemA,menH,gpdA1,Rv0567,mmaA2,rplW,rplV,rplX,rplE,rplF,rplR,rpmD,purD,desA1,galU,pmt,pks16,rplY,Rv1106c,lpqW,pks4,log,Rv1264,Rv1320c,mbtK,Rv1425,Rv1524,dnaE1,bioB,lgt,infC,argR,pks10,Rv1697,cmk,pgsA2,ppm1,cobH,pyrD,murG,Rv2182c,fadD15,fabD,acpM,kasA,Rv2285,cdh,dnaG,cysH,rpmA,Rv2449c,plsC,Rv2484c,ldtB,nusB,mltG,relA,apt,af…
GO Process	GO:1901137	Carbohydrate derivative biosynthetic process	30	181	0.36	0.0029	83332.Rv0016c,83332.Rv0050,83332.Rv0386,83332.Rv0564c,83332.Rv0772,83332.Rv1002c,83332.Rv1166,83332.Rv1264,83332.Rv1320c,83332.Rv1524,83332.Rv2051c,83332.Rv2139,83332.Rv2153c,83332.Rv2244,83332.Rv2449c,83332.Rv2518c,83332.Rv2553c,83332.Rv2583c,83332.Rv2584c,83332.Rv2697c,83332.Rv2911,83332.Rv2953,83332.Rv3032,83332.Rv3330,83332.Rv3441c,83332.Rv3624c,83332.Rv3682,83332.Rv3683,83332.Rv3793,83332.Rv…	pbpA,ponA1,Rv0386,gpdA1,purD,pmt,lpqW,Rv1264,Rv1320c,Rv1524,ppm1,pyrD,murG,acpM,Rv2449c,ldtB,mltG,relA,apt,dut,dacB2,Rv2953,Rv3032,dacB1,mrsA,hpt,ponA2,Rv3683,embC,glfT2
GO Process	GO:1901135	Carbohydrate derivative metabolic process	37	263	0.29	0.007	83332.Rv0016c,83332.Rv0050,83332.Rv0386,83332.Rv0564c,83332.Rv0772,83332.Rv0993,83332.Rv1002c,83332.Rv1022,83332.Rv1121,83332.Rv1166,83332.Rv1264,83332.Rv1320c,83332.Rv1524,83332.Rv2051c,83332.Rv2139,83332.Rv2153c,83332.Rv2244,83332.Rv2344c,83332.Rv2449c,83332.Rv2518c,83332.Rv2553c,83332.Rv2583c,83332.Rv2584c,83332.Rv2697c,83332.Rv2911,83332.Rv2953,83332.Rv3032,83332.Rv3225c,83332.Rv3330,83332.Rv…	pbpA,ponA1,Rv0386,gpdA1,purD,galU,pmt,lpqU,zwf1,lpqW,Rv1264,Rv1320c,Rv1524,ppm1,pyrD,murG,acpM,dgt,Rv2449c,ldtB,mltG,relA,apt,dut,dacB2,Rv2953,Rv3032,Rv3225c,dacB1,nagA,mrsA,hpt,ponA2,Rv3683,Rv3717,embC,glfT2
GO Process	GO:0005975	Carbohydrate metabolic process	25	157	0.35	0.0149	83332.Rv0046c,83332.Rv0062,83332.Rv0221,83332.Rv0315,83332.Rv0564c,83332.Rv1121,83332.Rv1425,83332.Rv1524,83332.Rv2153c,83332.Rv2244,83332.Rv2285,83332.Rv2484c,83332.Rv2673,83332.Rv3031,83332.Rv3032,83332.Rv3088,83332.Rv3265c,83332.Rv3332,83332.Rv3441c,83332.Rv3480c,83332.Rv3683,83332.Rv3734c,83332.Rv3792,83332.Rv3808c,83332.Rv3842c	ino1,celA1,Rv0221,Rv0315,gpdA1,zwf1,Rv1425,Rv1524,murG,acpM,Rv2285,Rv2484c,aftC,Rv3031,Rv3032,tgs4,wbbL1,nagA,mrsA,Rv3480c,Rv3683,tgs2,aftA,glfT2,glpQ1
GO Process	GO:0009056	Catabolic process	35	275	0.25	0.0349	83332.Rv0062,83332.Rv0070c,83332.Rv0406c,83332.Rv0410c,83332.Rv0564c,83332.Rv0646c,83332.Rv0654,83332.Rv0873,83332.Rv0888,83332.Rv0983,83332.Rv1022,83332.Rv1106c,83332.Rv1399c,83332.Rv1755c,83332.Rv1769,83332.Rv1850,83332.Rv1905c,83332.Rv1963c,83332.Rv1977,83332.Rv2289,83332.Rv2344c,83332.Rv2457c,83332.Rv2697c,83332.Rv2780,83332.Rv2859c,83332.Rv3091,83332.Rv3194c,83332.Rv3225c,83332.Rv3332,83332.…	celA1,glyA2,Rv0406c,pknG,gpdA1,lipG,Rv0654,fadE10,spmT,pepD,lpqU,Rv1106c,nlhH,plcD,Rv1769,ureC,aao,mce3R,Rv1977,cdh,dgt,clpX,dut,ald,Rv2859c,Rv3091,Rv3194c,Rv3225c,nagA,choD,Rv3479,cyp125,fadA5,egtD,Rv3717
GO Process	GO:0007154	Cell communication	18	100	0.4	0.024	83332.Rv0386,83332.Rv0560c,83332.Rv0602c,83332.Rv1033c,83332.Rv1264,83332.Rv1320c,83332.Rv1696,83332.Rv1860,83332.Rv2027c,83332.Rv2557,83332.Rv2558,83332.Rv2583c,83332.Rv2592c,83332.Rv2720,83332.Rv2737c,83332.Rv3246c,83332.Rv3583c,83332.Rv3597c	Rv0386,Rv0560c,tcrA,trcR,Rv1264,Rv1320c,recN,apa,dosT,Rv2557,Rv2558,relA,ruvB,lexA,recA,mtrA,carD,lsr2
GO Process	GO:0051301	Cell division	9	29	0.64	0.0236	83332.Rv0011c,83332.Rv0019c,83332.Rv1423,83332.Rv1701,83332.Rv1710,83332.Rv2147c,83332.Rv2150c,83332.Rv2153c,83332.Rv2457c	crgA,fhaB,whiA,xerD,scpB,sepF,ftsZ,murG,clpX
GO Process	GO:0044038	Cell wall macromolecule biosynthetic process	14	51	0.58	0.0036	83332.Rv0016c,83332.Rv0050,83332.Rv0206c,83332.Rv0503c,83332.Rv0644c,83332.Rv2153c,83332.Rv2518c,83332.Rv2553c,83332.Rv2911,83332.Rv3330,83332.Rv3441c,83332.Rv3682,83332.Rv3792,83332.Rv3808c	pbpA,ponA1,mmpL3,cmaA2,mmaA2,murG,ldtB,mltG,dacB2,dacB1,mrsA,ponA2,aftA,glfT2
GO Process	GO:0044036	Cell wall macromolecule metabolic process	15	54	0.59	0.0022	83332.Rv0016c,83332.Rv0050,83332.Rv0206c,83332.Rv0503c,83332.Rv0644c,83332.Rv2153c,83332.Rv2518c,83332.Rv2553c,83332.Rv2911,83332.Rv3330,83332.Rv3441c,83332.Rv3682,83332.Rv3717,83332.Rv3792,83332.Rv3808c	pbpA,ponA1,mmpL3,cmaA2,mmaA2,murG,ldtB,mltG,dacB2,dacB1,mrsA,ponA2,Rv3717,aftA,glfT2
GO Process	GO:0071555	Cell wall organization	15	64	0.51	0.008	83332.Rv0016c,83332.Rv0050,83332.Rv0206c,83332.Rv2153c,83332.Rv2518c,83332.Rv2553c,83332.Rv2673,83332.Rv2911,83332.Rv3330,83332.Rv3717,83332.Rv3792,83332.Rv3793,83332.Rv3795,83332.Rv3808c,83332.Rv3920c	pbpA,ponA1,mmpL3,murG,ldtB,mltG,aftC,dacB2,dacB1,Rv3717,aftA,embC,embB,glfT2,Rv3920c
GO Process	GO:0071554	Cell wall organization or biogenesis	24	129	0.41	0.0032	83332.Rv0016c,83332.Rv0050,83332.Rv0206c,83332.Rv0503c,83332.Rv0644c,83332.Rv1660,83332.Rv2153c,83332.Rv2187,83332.Rv2518c,83332.Rv2553c,83332.Rv2673,83332.Rv2911,83332.Rv2952,83332.Rv2953,83332.Rv3330,83332.Rv3441c,83332.Rv3515c,83332.Rv3682,83332.Rv3717,83332.Rv3792,83332.Rv3793,83332.Rv3795,83332.Rv3808c,83332.Rv3920c	pbpA,ponA1,mmpL3,cmaA2,mmaA2,pks10,murG,fadD15,ldtB,mltG,aftC,dacB2,Rv2952,Rv2953,dacB1,mrsA,fadD19,ponA2,Rv3717,aftA,embC,embB,glfT2,Rv3920c
GO Process	GO:0043603	Cellular amide metabolic process	27	167	0.35	0.008	83332.Rv0056,83332.Rv0070c,83332.Rv0406c,83332.Rv0703,83332.Rv0706,83332.Rv0715,83332.Rv0716,83332.Rv0719,83332.Rv0720,83332.Rv0722,83332.Rv0888,83332.Rv1015c,83332.Rv1347c,83332.Rv1524,83332.Rv1589,83332.Rv1641,83332.Rv1850,83332.Rv2244,83332.Rv2441c,83332.Rv2842c,83332.Rv2890c,83332.Rv2903c,83332.Rv2909c,83332.Rv3009c,83332.Rv3443c,83332.Rv3456c,83332.Rv3606c	rplI,glyA2,Rv0406c,rplW,rplV,rplX,rplE,rplF,rplR,rpmD,spmT,rplY,mbtK,Rv1524,bioB,infC,ureC,acpM,rpmA,rimP,rpsB,lepB,rpsP,gatB,rplM,rplQ,folK
GO Process	GO:0044249	Cellular biosynthetic process	102	741	0.28	1.61e-08	83332.Rv0013,83332.Rv0016c,83332.Rv0035,83332.Rv0046c,83332.Rv0050,83332.Rv0056,83332.Rv0070c,83332.Rv0130,83332.Rv0206c,83332.Rv0216,83332.Rv0221,83332.Rv0386,83332.Rv0503c,83332.Rv0509,83332.Rv0558,83332.Rv0564c,83332.Rv0567,83332.Rv0644c,83332.Rv0703,83332.Rv0706,83332.Rv0715,83332.Rv0716,83332.Rv0719,83332.Rv0720,83332.Rv0722,83332.Rv0772,83332.Rv0824c,83332.Rv1002c,83332.Rv1013,83332.Rv1015c…	trpG,pbpA,fadD34,ino1,ponA1,rplI,glyA2,htdZ,mmpL3,Rv0216,Rv0221,Rv0386,cmaA2,hemA,menH,gpdA1,Rv0567,mmaA2,rplW,rplV,rplX,rplE,rplF,rplR,rpmD,purD,desA1,pmt,pks16,rplY,lpqW,pks4,log,Rv1264,Rv1320c,mbtK,Rv1425,Rv1524,dnaE1,bioB,lgt,infC,argR,pks10,Rv1697,cmk,pgsA2,ppm1,cobH,pyrD,murG,Rv2182c,fadD15,fabD,acpM,kasA,Rv2285,cdh,dnaG,cysH,rpmA,Rv2449c,plsC,Rv2484c,ldtB,nusB,mltG,relA,apt,aftC,dut,dapB,r…
GO Process	GO:0044262	Cellular carbohydrate metabolic process	16	91	0.39	0.0407	83332.Rv0046c,83332.Rv0062,83332.Rv0221,83332.Rv1425,83332.Rv2285,83332.Rv2484c,83332.Rv2673,83332.Rv3031,83332.Rv3032,83332.Rv3088,83332.Rv3265c,83332.Rv3480c,83332.Rv3734c,83332.Rv3792,83332.Rv3808c,83332.Rv3842c	ino1,celA1,Rv0221,Rv1425,Rv2285,Rv2484c,aftC,Rv3031,Rv3032,tgs4,wbbL1,Rv3480c,tgs2,aftA,glfT2,glpQ1
GO Process	GO:0044085	Cellular component biogenesis	34	172	0.44	5.55e-05	83332.Rv0016c,83332.Rv0050,83332.Rv0206c,83332.Rv0503c,83332.Rv0644c,83332.Rv0703,83332.Rv0706,83332.Rv1010,83332.Rv1540,83332.Rv1657,83332.Rv1660,83332.Rv2147c,83332.Rv2150c,83332.Rv2153c,83332.Rv2187,83332.Rv2418c,83332.Rv2518c,83332.Rv2553c,83332.Rv2554c,83332.Rv2838c,83332.Rv2842c,83332.Rv2907c,83332.Rv2911,83332.Rv2952,83332.Rv2953,83332.Rv3211,83332.Rv3330,83332.Rv3441c,83332.Rv3515c,83332.…	pbpA,ponA1,mmpL3,cmaA2,mmaA2,rplW,rplV,ksgA,Rv1540,argR,pks10,sepF,ftsZ,murG,fadD15,octT,ldtB,mltG,Rv2554c,rbfA,rimP,rimM,dacB2,Rv2952,Rv2953,rhlE,dacB1,mrsA,fadD19,ponA2,aftA,embC,embB,glfT2
GO Process	GO:0016043	Cellular component organization	32	189	0.37	0.0014	83332.Rv0016c,83332.Rv0050,83332.Rv0206c,83332.Rv0503c,83332.Rv0629c,83332.Rv0630c,83332.Rv0631c,83332.Rv0703,83332.Rv0706,83332.Rv1641,83332.Rv1657,83332.Rv1660,83332.Rv2147c,83332.Rv2150c,83332.Rv2153c,83332.Rv2418c,83332.Rv2518c,83332.Rv2553c,83332.Rv2592c,83332.Rv2673,83332.Rv2842c,83332.Rv2911,83332.Rv2952,83332.Rv2953,83332.Rv3211,83332.Rv3330,83332.Rv3717,83332.Rv3792,83332.Rv3793,83332.Rv…	pbpA,ponA1,mmpL3,cmaA2,recD,recB,recC,rplW,rplV,infC,argR,pks10,sepF,ftsZ,murG,octT,ldtB,mltG,ruvB,aftC,rimP,dacB2,Rv2952,Rv2953,rhlE,dacB1,Rv3717,aftA,embC,embB,glfT2,Rv3920c
GO Process	GO:0071840	Cellular component organization or biogenesis	42	240	0.39	5.12e-05	83332.Rv0016c,83332.Rv0050,83332.Rv0206c,83332.Rv0503c,83332.Rv0629c,83332.Rv0630c,83332.Rv0631c,83332.Rv0644c,83332.Rv0703,83332.Rv0706,83332.Rv1010,83332.Rv1540,83332.Rv1641,83332.Rv1657,83332.Rv1660,83332.Rv2147c,83332.Rv2150c,83332.Rv2153c,83332.Rv2187,83332.Rv2418c,83332.Rv2518c,83332.Rv2553c,83332.Rv2554c,83332.Rv2592c,83332.Rv2673,83332.Rv2838c,83332.Rv2842c,83332.Rv2907c,83332.Rv2911,8333…	pbpA,ponA1,mmpL3,cmaA2,recD,recB,recC,mmaA2,rplW,rplV,ksgA,Rv1540,infC,argR,pks10,sepF,ftsZ,murG,fadD15,octT,ldtB,mltG,Rv2554c,ruvB,aftC,rbfA,rimP,rimM,dacB2,Rv2952,Rv2953,rhlE,dacB1,mrsA,fadD19,ponA2,Rv3717,aftA,embC,embB,glfT2,Rv3920c
GO Process	GO:0044255	Cellular lipid metabolic process	45	274	0.36	7.39e-05	83332.Rv0035,83332.Rv0046c,83332.Rv0130,83332.Rv0206c,83332.Rv0216,83332.Rv0221,83332.Rv0503c,83332.Rv0564c,83332.Rv0644c,83332.Rv0646c,83332.Rv0654,83332.Rv0824c,83332.Rv0873,83332.Rv0888,83332.Rv1013,83332.Rv1166,83332.Rv1181,83332.Rv1425,83332.Rv1524,83332.Rv1660,83332.Rv1822,83332.Rv2051c,83332.Rv2153c,83332.Rv2182c,83332.Rv2187,83332.Rv2243,83332.Rv2244,83332.Rv2245,83332.Rv2285,83332.Rv2289…	fadD34,ino1,htdZ,mmpL3,Rv0216,Rv0221,cmaA2,gpdA1,mmaA2,lipG,Rv0654,desA1,fadE10,spmT,pks16,lpqW,pks4,Rv1425,Rv1524,pks10,pgsA2,ppm1,murG,Rv2182c,fadD15,fabD,acpM,kasA,Rv2285,cdh,Rv2449c,plsC,Rv2484c,Rv2953,Rv3032,tgs4,Rv3230c,Rv3480c,fadD19,fadA5,Rv3683,tgs2,embC,glfT2,Rv3816c
GO Process	GO:0034645	Cellular macromolecule biosynthetic process	38	185	0.46	7.81e-06	83332.Rv0016c,83332.Rv0050,83332.Rv0056,83332.Rv0206c,83332.Rv0503c,83332.Rv0644c,83332.Rv0703,83332.Rv0706,83332.Rv0715,83332.Rv0716,83332.Rv0719,83332.Rv0720,83332.Rv0722,83332.Rv1002c,83332.Rv1015c,83332.Rv1614,83332.Rv1641,83332.Rv2051c,83332.Rv2153c,83332.Rv2441c,83332.Rv2518c,83332.Rv2553c,83332.Rv2673,83332.Rv2842c,83332.Rv2890c,83332.Rv2909c,83332.Rv2911,83332.Rv3009c,83332.Rv3031,83332.R…	pbpA,ponA1,rplI,mmpL3,cmaA2,mmaA2,rplW,rplV,rplX,rplE,rplF,rplR,rpmD,pmt,rplY,lgt,infC,ppm1,murG,rpmA,ldtB,mltG,aftC,rimP,rpsB,rpsP,dacB2,gatB,Rv3031,Rv3032,wbbL1,dacB1,mrsA,rplM,rplQ,ponA2,aftA,glfT2
GO Process	GO:0044260	Cellular macromolecule metabolic process	64	434	0.31	1.13e-05	83332.Rv0016c,83332.Rv0050,83332.Rv0056,83332.Rv0062,83332.Rv0206c,83332.Rv0503c,83332.Rv0629c,83332.Rv0630c,83332.Rv0631c,83332.Rv0644c,83332.Rv0703,83332.Rv0706,83332.Rv0715,83332.Rv0716,83332.Rv0719,83332.Rv0720,83332.Rv0722,83332.Rv0795,83332.Rv1002c,83332.Rv1010,83332.Rv1015c,83332.Rv1156,83332.Rv1210,83332.Rv1259,83332.Rv1316c,83332.Rv1547,83332.Rv1614,83332.Rv1641,83332.Rv1696,83332.Rv1701…	pbpA,ponA1,rplI,celA1,mmpL3,cmaA2,recD,recB,recC,mmaA2,rplW,rplV,rplX,rplE,rplF,rplR,rpmD,Rv0795,pmt,ksgA,rplY,Rv1156,tagA,udgB,ogt,dnaE1,lgt,infC,recN,xerD,ppm1,Rv2090,murG,dnaG,rpmA,ldtB,mrr,mltG,ruvB,aftC,lexA,recA,rimP,rpsB,rpsP,dacB2,ung,mutT1,gatB,Rv3030,Rv3031,Rv3032,wbbL1,dacB1,mrsA,rplM,rplQ,lsr2,nth,ponA2,egtD,Rv3717,aftA,glfT2
GO Process	GO:0044237	Cellular metabolic process	168	1411	0.22	5.87e-12	83332.Rv0013,83332.Rv0016c,83332.Rv0035,83332.Rv0046c,83332.Rv0050,83332.Rv0056,83332.Rv0062,83332.Rv0070c,83332.Rv0130,83332.Rv0147,83332.Rv0206c,83332.Rv0216,83332.Rv0221,83332.Rv0386,83332.Rv0406c,83332.Rv0410c,83332.Rv0503c,83332.Rv0509,83332.Rv0558,83332.Rv0564c,83332.Rv0567,83332.Rv0629c,83332.Rv0630c,83332.Rv0631c,83332.Rv0644c,83332.Rv0646c,83332.Rv0654,83332.Rv0703,83332.Rv0706,83332.Rv0…	trpG,pbpA,fadD34,ino1,ponA1,rplI,celA1,glyA2,htdZ,Rv0147,mmpL3,Rv0216,Rv0221,Rv0386,Rv0406c,pknG,cmaA2,hemA,menH,gpdA1,Rv0567,recD,recB,recC,mmaA2,lipG,Rv0654,rplW,rplV,rplX,rplE,rplF,rplR,rpmD,purD,Rv0795,desA1,fadE10,spmT,galU,pmt,ksgA,pks16,rplY,zwf1,Rv1156,narH,lpqW,pks4,log,tagA,udgB,Rv1264,ogt,Rv1320c,mbtK,Rv1425,Rv1524,Rv1540,dnaE1,bioB,lgt,cydA,infC,argR,pks10,recN,Rv1697,xerD,cmk,Rv1769,…
GO Process	GO:0044271	Cellular nitrogen compound biosynthetic process	42	360	0.21	0.0423	83332.Rv0013,83332.Rv0056,83332.Rv0386,83332.Rv0509,83332.Rv0703,83332.Rv0706,83332.Rv0715,83332.Rv0716,83332.Rv0719,83332.Rv0720,83332.Rv0722,83332.Rv0772,83332.Rv1015c,83332.Rv1264,83332.Rv1320c,83332.Rv1347c,83332.Rv1524,83332.Rv1547,83332.Rv1589,83332.Rv1641,83332.Rv1697,83332.Rv1712,83332.Rv2065,83332.Rv2139,83332.Rv2343c,83332.Rv2441c,83332.Rv2533c,83332.Rv2583c,83332.Rv2584c,83332.Rv2697c,…	trpG,rplI,Rv0386,hemA,rplW,rplV,rplX,rplE,rplF,rplR,rpmD,purD,rplY,Rv1264,Rv1320c,mbtK,Rv1524,dnaE1,bioB,infC,Rv1697,cmk,cobH,pyrD,dnaG,rpmA,nusB,relA,apt,dut,rimP,rpsB,rpsP,gatB,mrsA,rplM,rplQ,carD,folK,hpt,egtD,Rv3788
GO Process	GO:0034641	Cellular nitrogen compound metabolic process	83	740	0.19	0.0017	83332.Rv0013,83332.Rv0056,83332.Rv0070c,83332.Rv0386,83332.Rv0406c,83332.Rv0509,83332.Rv0629c,83332.Rv0630c,83332.Rv0631c,83332.Rv0703,83332.Rv0706,83332.Rv0715,83332.Rv0716,83332.Rv0719,83332.Rv0720,83332.Rv0722,83332.Rv0772,83332.Rv0795,83332.Rv0888,83332.Rv0993,83332.Rv1010,83332.Rv1015c,83332.Rv1156,83332.Rv1210,83332.Rv1259,83332.Rv1264,83332.Rv1316c,83332.Rv1320c,83332.Rv1347c,83332.Rv1524,…	trpG,rplI,glyA2,Rv0386,Rv0406c,hemA,recD,recB,recC,rplW,rplV,rplX,rplE,rplF,rplR,rpmD,purD,Rv0795,spmT,galU,ksgA,rplY,Rv1156,tagA,udgB,Rv1264,ogt,Rv1320c,mbtK,Rv1524,Rv1540,dnaE1,bioB,infC,recN,Rv1697,xerD,cmk,ureC,cobH,Rv2090,pyrD,acpM,moeW,dnaG,dgt,rpmA,mrr,nusB,Rv2554c,relA,apt,ruvB,dut,lexA,recA,csm3,rbfA,rimP,Rv2859c,rpsB,lepB,rimM,rpsP,ung,mutT1,gatB,Rv3030,vapC46,mrsA,rplM,truA,rplQ,carD,l…
GO Process	GO:0009987	Cellular process	205	1738	0.22	3.04e-17	83332.Rv0011c,83332.Rv0013,83332.Rv0016c,83332.Rv0019c,83332.Rv0035,83332.Rv0046c,83332.Rv0050,83332.Rv0056,83332.Rv0062,83332.Rv0070c,83332.Rv0073,83332.Rv0092,83332.Rv0130,83332.Rv0137c,83332.Rv0147,83332.Rv0169,83332.Rv0206c,83332.Rv0216,83332.Rv0221,83332.Rv0386,83332.Rv0406c,83332.Rv0410c,83332.Rv0503c,83332.Rv0509,83332.Rv0558,83332.Rv0560c,83332.Rv0564c,83332.Rv0567,83332.Rv0602c,83332.Rv0…	crgA,trpG,pbpA,fhaB,fadD34,ino1,ponA1,rplI,celA1,glyA2,Rv0073,ctpA,htdZ,msrA,Rv0147,mce1A,mmpL3,Rv0216,Rv0221,Rv0386,Rv0406c,pknG,cmaA2,hemA,menH,Rv0560c,gpdA1,Rv0567,tcrA,recD,recB,recC,mmaA2,lipG,Rv0654,rplW,rplV,rplX,rplE,rplF,rplR,rpmD,secY,purD,Rv0795,desA1,fadE10,spmT,ompA,pepD,Rv0986,galU,pmt,ksgA,pks16,rplY,trcR,zwf1,Rv1156,narH,lpqW,pks4,log,tagA,udgB,Rv1264,oppD,ogt,Rv1320c,mbtK,whiA,Rv…
GO Process	GO:0006974	Cellular response to DNA damage stimulus	15	72	0.46	0.019	83332.Rv0629c,83332.Rv0630c,83332.Rv0631c,83332.Rv1156,83332.Rv1210,83332.Rv1259,83332.Rv1316c,83332.Rv1696,83332.Rv2592c,83332.Rv2720,83332.Rv2737c,83332.Rv2976c,83332.Rv2985,83332.Rv3623,83332.Rv3674c	recD,recB,recC,Rv1156,tagA,udgB,ogt,recN,ruvB,lexA,recA,ung,mutT1,lpqG,nth
GO Process	GO:0031668	Cellular response to extracellular stimulus	11	47	0.51	0.0349	83332.Rv0560c,83332.Rv1696,83332.Rv1860,83332.Rv2557,83332.Rv2558,83332.Rv2583c,83332.Rv2592c,83332.Rv2720,83332.Rv2737c,83332.Rv3583c,83332.Rv3597c	Rv0560c,recN,apa,Rv2557,Rv2558,relA,ruvB,lexA,recA,carD,lsr2
GO Process	GO:0051716	Cellular response to stimulus	36	222	0.35	0.001	83332.Rv0050,83332.Rv0137c,83332.Rv0386,83332.Rv0560c,83332.Rv0602c,83332.Rv0629c,83332.Rv0630c,83332.Rv0631c,83332.Rv0888,83332.Rv0983,83332.Rv1033c,83332.Rv1156,83332.Rv1162,83332.Rv1210,83332.Rv1259,83332.Rv1264,83332.Rv1316c,83332.Rv1320c,83332.Rv1608c,83332.Rv1696,83332.Rv1860,83332.Rv2027c,83332.Rv2557,83332.Rv2558,83332.Rv2583c,83332.Rv2592c,83332.Rv2720,83332.Rv2737c,83332.Rv2976c,83332.R…	ponA1,msrA,Rv0386,Rv0560c,tcrA,recD,recB,recC,spmT,pepD,trcR,Rv1156,narH,tagA,udgB,Rv1264,ogt,Rv1320c,bcpB,recN,apa,dosT,Rv2557,Rv2558,relA,ruvB,lexA,recA,ung,mutT1,mtrA,fadA5,carD,lsr2,lpqG,nth
GO Process	GO:0033554	Cellular response to stress	25	133	0.42	0.0022	83332.Rv0050,83332.Rv0137c,83332.Rv0560c,83332.Rv0629c,83332.Rv0630c,83332.Rv0631c,83332.Rv1156,83332.Rv1210,83332.Rv1259,83332.Rv1316c,83332.Rv1608c,83332.Rv1696,83332.Rv1860,83332.Rv2557,83332.Rv2558,83332.Rv2583c,83332.Rv2592c,83332.Rv2720,83332.Rv2737c,83332.Rv2976c,83332.Rv2985,83332.Rv3583c,83332.Rv3597c,83332.Rv3623,83332.Rv3674c	ponA1,msrA,Rv0560c,recD,recB,recC,Rv1156,tagA,udgB,ogt,bcpB,recN,apa,Rv2557,Rv2558,relA,ruvB,lexA,recA,ung,mutT1,carD,lsr2,lpqG,nth
GO Process	GO:0052008	Disruption by symbiont of host cellular component	4	4	1.14	0.0331	83332.Rv1755c,83332.Rv2349c,83332.Rv2350c,83332.Rv2351c	plcD,plcC,plcB,plcA
GO Process	GO:0006281	DNA repair	14	66	0.47	0.024	83332.Rv0629c,83332.Rv0630c,83332.Rv0631c,83332.Rv1156,83332.Rv1210,83332.Rv1259,83332.Rv1316c,83332.Rv1696,83332.Rv2592c,83332.Rv2720,83332.Rv2737c,83332.Rv2976c,83332.Rv2985,83332.Rv3674c	recD,recB,recC,Rv1156,tagA,udgB,ogt,recN,ruvB,lexA,recA,ung,mutT1,nth
GO Process	GO:0000724	Double-strand break repair via homologous recombination	4	5	1.05	0.042	83332.Rv0629c,83332.Rv0630c,83332.Rv0631c,83332.Rv1696	recD,recB,recC,recN
GO Process	GO:0010467	Gene expression	30	209	0.3	0.0181	83332.Rv0056,83332.Rv0703,83332.Rv0706,83332.Rv0715,83332.Rv0716,83332.Rv0719,83332.Rv0720,83332.Rv0722,83332.Rv1010,83332.Rv1015c,83332.Rv1540,83332.Rv1641,83332.Rv2338c,83332.Rv2441c,83332.Rv2533c,83332.Rv2554c,83332.Rv2737c,83332.Rv2838c,83332.Rv2842c,83332.Rv2890c,83332.Rv2903c,83332.Rv2907c,83332.Rv2909c,83332.Rv3009c,83332.Rv3030,83332.Rv3443c,83332.Rv3455c,83332.Rv3456c,83332.Rv3583c,83332…	rplI,rplW,rplV,rplX,rplE,rplF,rplR,rpmD,ksgA,rplY,Rv1540,infC,moeW,rpmA,nusB,Rv2554c,recA,rbfA,rimP,rpsB,lepB,rimM,rpsP,gatB,Rv3030,rplM,truA,rplQ,carD,Rv3788
GO Process	GO:0006071	Glycerol metabolic process	8	24	0.67	0.0291	83332.Rv0221,83332.Rv1425,83332.Rv2285,83332.Rv2484c,83332.Rv3088,83332.Rv3480c,83332.Rv3734c,83332.Rv3842c	Rv0221,Rv1425,Rv2285,Rv2484c,tgs4,Rv3480c,tgs2,glpQ1
GO Process	GO:0045017	Glycerolipid biosynthetic process	11	33	0.67	0.0049	83332.Rv0221,83332.Rv1425,83332.Rv1822,83332.Rv2182c,83332.Rv2285,83332.Rv2483c,83332.Rv2484c,83332.Rv3088,83332.Rv3480c,83332.Rv3734c,83332.Rv3816c	Rv0221,Rv1425,pgsA2,Rv2182c,Rv2285,plsC,Rv2484c,tgs4,Rv3480c,tgs2,Rv3816c
GO Process	GO:0046486	Glycerolipid metabolic process	15	54	0.59	0.0022	83332.Rv0221,83332.Rv0564c,83332.Rv0646c,83332.Rv1166,83332.Rv1425,83332.Rv1822,83332.Rv2182c,83332.Rv2285,83332.Rv2289,83332.Rv2483c,83332.Rv2484c,83332.Rv3088,83332.Rv3480c,83332.Rv3734c,83332.Rv3816c	Rv0221,gpdA1,lipG,lpqW,Rv1425,pgsA2,Rv2182c,Rv2285,cdh,plsC,Rv2484c,tgs4,Rv3480c,tgs2,Rv3816c
GO Process	GO:0008610	Lipid biosynthetic process	39	214	0.4	5.12e-05	83332.Rv0035,83332.Rv0046c,83332.Rv0130,83332.Rv0206c,83332.Rv0216,83332.Rv0221,83332.Rv0503c,83332.Rv0564c,83332.Rv0644c,83332.Rv0824c,83332.Rv1013,83332.Rv1106c,83332.Rv1166,83332.Rv1181,83332.Rv1425,83332.Rv1660,83332.Rv1822,83332.Rv2051c,83332.Rv2182c,83332.Rv2187,83332.Rv2243,83332.Rv2244,83332.Rv2245,83332.Rv2285,83332.Rv2289,83332.Rv2449c,83332.Rv2483c,83332.Rv2484c,83332.Rv2953,83332.Rv30…	fadD34,ino1,htdZ,mmpL3,Rv0216,Rv0221,cmaA2,gpdA1,mmaA2,desA1,pks16,Rv1106c,lpqW,pks4,Rv1425,pks10,pgsA2,ppm1,Rv2182c,fadD15,fabD,acpM,kasA,Rv2285,cdh,Rv2449c,plsC,Rv2484c,Rv2953,Rv3032,tgs4,Rv3480c,fadD19,Rv3683,Rv3720,tgs2,embC,glfT2,Rv3816c
GO Process	GO:0006629	Lipid metabolic process	57	355	0.35	7.13e-06	83332.Rv0035,83332.Rv0046c,83332.Rv0130,83332.Rv0206c,83332.Rv0216,83332.Rv0221,83332.Rv0317c,83332.Rv0503c,83332.Rv0564c,83332.Rv0644c,83332.Rv0646c,83332.Rv0654,83332.Rv0824c,83332.Rv0873,83332.Rv0888,83332.Rv1013,83332.Rv1106c,83332.Rv1166,83332.Rv1181,83332.Rv1184c,83332.Rv1425,83332.Rv1524,83332.Rv1660,83332.Rv1755c,83332.Rv1822,83332.Rv1963c,83332.Rv2051c,83332.Rv2153c,83332.Rv2182c,83332.R…	fadD34,ino1,htdZ,mmpL3,Rv0216,Rv0221,glpQ2,cmaA2,gpdA1,mmaA2,lipG,Rv0654,desA1,fadE10,spmT,pks16,Rv1106c,lpqW,pks4,chp2,Rv1425,Rv1524,pks10,plcD,pgsA2,mce3R,ppm1,murG,Rv2182c,fadD15,fabD,acpM,kasA,Rv2285,cdh,Rv2449c,plsC,Rv2484c,Rv2952,Rv2953,Rv3032,tgs4,Rv3091,Rv3230c,choD,Rv3479,Rv3480c,fadD19,cyp125,fadA5,Rv3683,Rv3720,tgs2,embC,glfT2,Rv3816c,glpQ1
GO Process	GO:0009059	Macromolecule biosynthetic process	43	232	0.41	1.07e-05	83332.Rv0016c,83332.Rv0050,83332.Rv0056,83332.Rv0206c,83332.Rv0503c,83332.Rv0644c,83332.Rv0703,83332.Rv0706,83332.Rv0715,83332.Rv0716,83332.Rv0719,83332.Rv0720,83332.Rv0722,83332.Rv1002c,83332.Rv1015c,83332.Rv1547,83332.Rv1614,83332.Rv1641,83332.Rv2051c,83332.Rv2153c,83332.Rv2343c,83332.Rv2441c,83332.Rv2518c,83332.Rv2533c,83332.Rv2553c,83332.Rv2673,83332.Rv2842c,83332.Rv2890c,83332.Rv2909c,83332.…	pbpA,ponA1,rplI,mmpL3,cmaA2,mmaA2,rplW,rplV,rplX,rplE,rplF,rplR,rpmD,pmt,rplY,dnaE1,lgt,infC,ppm1,murG,dnaG,rpmA,ldtB,nusB,mltG,aftC,rimP,rpsB,rpsP,dacB2,gatB,Rv3031,Rv3032,wbbL1,dacB1,mrsA,rplM,rplQ,carD,ponA2,Rv3788,aftA,glfT2
GO Process	GO:0043170	Macromolecule metabolic process	89	704	0.25	1.17e-05	83332.Rv0016c,83332.Rv0050,83332.Rv0056,83332.Rv0062,83332.Rv0206c,83332.Rv0410c,83332.Rv0503c,83332.Rv0629c,83332.Rv0630c,83332.Rv0631c,83332.Rv0644c,83332.Rv0703,83332.Rv0706,83332.Rv0715,83332.Rv0716,83332.Rv0719,83332.Rv0720,83332.Rv0722,83332.Rv0795,83332.Rv0983,83332.Rv1002c,83332.Rv1010,83332.Rv1015c,83332.Rv1022,83332.Rv1156,83332.Rv1210,83332.Rv1259,83332.Rv1316c,83332.Rv1540,83332.Rv154…	pbpA,ponA1,rplI,celA1,mmpL3,pknG,cmaA2,recD,recB,recC,mmaA2,rplW,rplV,rplX,rplE,rplF,rplR,rpmD,Rv0795,pepD,pmt,ksgA,rplY,lpqU,Rv1156,tagA,udgB,ogt,Rv1540,dnaE1,lgt,infC,recN,xerD,Rv1977,dosT,ppm1,Rv2090,murG,ptpA,moeW,dnaG,rpmA,clpX,ldtB,mrr,nusB,mltG,Rv2554c,ruvB,aftC,msrB,lexA,recA,csm3,rbfA,rimP,rpsB,lepB,rimM,rpsP,dacB2,ung,mutT1,gatB,Rv3030,Rv3031,Rv3032,moaE1,Rv3194c,Rv3207c,mtrA,wbbL1,dacB…
GO Process	GO:0008152	Metabolic process	199	1630	0.23	1.06e-17	83332.Rv0013,83332.Rv0016c,83332.Rv0035,83332.Rv0046c,83332.Rv0050,83332.Rv0056,83332.Rv0062,83332.Rv0070c,83332.Rv0130,83332.Rv0147,83332.Rv0206c,83332.Rv0216,83332.Rv0221,83332.Rv0315,83332.Rv0317c,83332.Rv0386,83332.Rv0392c,83332.Rv0406c,83332.Rv0410c,83332.Rv0503c,83332.Rv0509,83332.Rv0558,83332.Rv0560c,83332.Rv0564c,83332.Rv0567,83332.Rv0629c,83332.Rv0630c,83332.Rv0631c,83332.Rv0644c,83332.R…	trpG,pbpA,fadD34,ino1,ponA1,rplI,celA1,glyA2,htdZ,Rv0147,mmpL3,Rv0216,Rv0221,Rv0315,glpQ2,Rv0386,ndhA,Rv0406c,pknG,cmaA2,hemA,menH,Rv0560c,gpdA1,Rv0567,recD,recB,recC,mmaA2,lipG,Rv0654,rplW,rplV,rplX,rplE,rplF,rplR,rpmD,Rv0731c,purD,Rv0795,desA1,fadE10,spmT,pepD,galU,pmt,ksgA,pks16,rplY,lpqU,Rv1106c,zwf1,Rv1156,narH,lpqW,pks4,chp2,log,tagA,Rv1220c,udgB,Rv1264,ogt,Rv1320c,mbtK,nlhH,Rv1425,Rv1523,R…
GO Process	GO:0032259	Methylation	17	92	0.41	0.0254	83332.Rv0503c,83332.Rv0558,83332.Rv0560c,83332.Rv0567,83332.Rv0644c,83332.Rv0731c,83332.Rv1010,83332.Rv1220c,83332.Rv1316c,83332.Rv1523,83332.Rv2622,83332.Rv2751,83332.Rv2952,83332.Rv3030,83332.Rv3238c,83332.Rv3701c,83332.Rv3720	cmaA2,menH,Rv0560c,Rv0567,mmaA2,Rv0731c,ksgA,Rv1220c,ogt,Rv1523,Rv2622,Rv2751,Rv2952,Rv3030,mddA,egtD,Rv3720
GO Process	GO:0052043	Modification by symbiont of host cellular component	5	5	1.14	0.0102	83332.Rv1755c,83332.Rv2234,83332.Rv2349c,83332.Rv2350c,83332.Rv2351c	plcD,ptpA,plcC,plcB,plcA
GO Process	GO:0006807	Nitrogen compound metabolic process	116	1051	0.19	5.12e-05	83332.Rv0013,83332.Rv0016c,83332.Rv0050,83332.Rv0056,83332.Rv0070c,83332.Rv0386,83332.Rv0406c,83332.Rv0410c,83332.Rv0509,83332.Rv0629c,83332.Rv0630c,83332.Rv0631c,83332.Rv0703,83332.Rv0706,83332.Rv0715,83332.Rv0716,83332.Rv0719,83332.Rv0720,83332.Rv0722,83332.Rv0772,83332.Rv0795,83332.Rv0888,83332.Rv0983,83332.Rv0993,83332.Rv1002c,83332.Rv1010,83332.Rv1015c,83332.Rv1022,83332.Rv1156,83332.Rv1162,…	trpG,pbpA,ponA1,rplI,glyA2,Rv0386,Rv0406c,pknG,hemA,recD,recB,recC,rplW,rplV,rplX,rplE,rplF,rplR,rpmD,purD,Rv0795,spmT,pepD,galU,pmt,ksgA,rplY,lpqU,Rv1156,narH,log,tagA,udgB,Rv1264,ogt,Rv1320c,mbtK,Rv1524,Rv1540,dnaE1,bioB,lgt,infC,argR,recN,Rv1697,xerD,cmk,Rv1769,ureC,aao,Rv1977,dosT,ppm1,cobH,Rv2090,pyrD,murG,ptpA,acpM,moeW,dnaG,dgt,cysH,rpmA,clpX,ldtB,mrr,nusB,mltG,Rv2554c,relA,apt,ruvB,msrB,d…
GO Process	GO:1901576	Organic substance biosynthetic process	102	763	0.27	6.97e-08	83332.Rv0013,83332.Rv0016c,83332.Rv0035,83332.Rv0046c,83332.Rv0050,83332.Rv0056,83332.Rv0070c,83332.Rv0130,83332.Rv0206c,83332.Rv0216,83332.Rv0221,83332.Rv0386,83332.Rv0503c,83332.Rv0509,83332.Rv0558,83332.Rv0564c,83332.Rv0644c,83332.Rv0703,83332.Rv0706,83332.Rv0715,83332.Rv0716,83332.Rv0719,83332.Rv0720,83332.Rv0722,83332.Rv0772,83332.Rv0824c,83332.Rv1002c,83332.Rv1013,83332.Rv1015c,83332.Rv1106…	trpG,pbpA,fadD34,ino1,ponA1,rplI,glyA2,htdZ,mmpL3,Rv0216,Rv0221,Rv0386,cmaA2,hemA,menH,gpdA1,mmaA2,rplW,rplV,rplX,rplE,rplF,rplR,rpmD,purD,desA1,pmt,pks16,rplY,Rv1106c,lpqW,pks4,Rv1264,Rv1320c,mbtK,Rv1425,Rv1524,dnaE1,bioB,lgt,infC,argR,pks10,Rv1697,cmk,pgsA2,ppm1,cobH,pyrD,murG,Rv2182c,fadD15,fabD,acpM,kasA,Rv2285,cdh,dnaG,cysH,rpmA,Rv2449c,plsC,Rv2484c,ldtB,nusB,mltG,relA,apt,aftC,dut,dapB,rimP…
GO Process	GO:1901575	Organic substance catabolic process	34	267	0.25	0.0354	83332.Rv0062,83332.Rv0070c,83332.Rv0406c,83332.Rv0410c,83332.Rv0564c,83332.Rv0646c,83332.Rv0654,83332.Rv0873,83332.Rv0888,83332.Rv0983,83332.Rv1022,83332.Rv1106c,83332.Rv1755c,83332.Rv1769,83332.Rv1850,83332.Rv1905c,83332.Rv1963c,83332.Rv1977,83332.Rv2289,83332.Rv2344c,83332.Rv2457c,83332.Rv2697c,83332.Rv2780,83332.Rv2859c,83332.Rv3091,83332.Rv3194c,83332.Rv3225c,83332.Rv3332,83332.Rv3409c,83332.…	celA1,glyA2,Rv0406c,pknG,gpdA1,lipG,Rv0654,fadE10,spmT,pepD,lpqU,Rv1106c,plcD,Rv1769,ureC,aao,mce3R,Rv1977,cdh,dgt,clpX,dut,ald,Rv2859c,Rv3091,Rv3194c,Rv3225c,nagA,choD,Rv3479,cyp125,fadA5,egtD,Rv3717
GO Process	GO:0071704	Organic substance metabolic process	179	1494	0.22	1.05e-13	83332.Rv0013,83332.Rv0016c,83332.Rv0035,83332.Rv0046c,83332.Rv0050,83332.Rv0056,83332.Rv0062,83332.Rv0070c,83332.Rv0130,83332.Rv0147,83332.Rv0206c,83332.Rv0216,83332.Rv0221,83332.Rv0315,83332.Rv0317c,83332.Rv0386,83332.Rv0406c,83332.Rv0410c,83332.Rv0503c,83332.Rv0509,83332.Rv0558,83332.Rv0564c,83332.Rv0629c,83332.Rv0630c,83332.Rv0631c,83332.Rv0644c,83332.Rv0646c,83332.Rv0654,83332.Rv0703,83332.Rv…	trpG,pbpA,fadD34,ino1,ponA1,rplI,celA1,glyA2,htdZ,Rv0147,mmpL3,Rv0216,Rv0221,Rv0315,glpQ2,Rv0386,Rv0406c,pknG,cmaA2,hemA,menH,gpdA1,recD,recB,recC,mmaA2,lipG,Rv0654,rplW,rplV,rplX,rplE,rplF,rplR,rpmD,purD,Rv0795,desA1,fadE10,spmT,pepD,galU,pmt,ksgA,pks16,rplY,lpqU,Rv1106c,zwf1,Rv1156,narH,lpqW,pks4,chp2,log,tagA,udgB,Rv1264,ogt,Rv1320c,mbtK,Rv1425,Rv1524,Rv1540,dnaE1,bioB,lgt,infC,argR,pks10,recN…
GO Process	GO:1901566	Organonitrogen compound biosynthetic process	53	444	0.22	0.0109	83332.Rv0013,83332.Rv0016c,83332.Rv0050,83332.Rv0056,83332.Rv0070c,83332.Rv0386,83332.Rv0509,83332.Rv0703,83332.Rv0706,83332.Rv0715,83332.Rv0716,83332.Rv0719,83332.Rv0720,83332.Rv0722,83332.Rv0772,83332.Rv1002c,83332.Rv1015c,83332.Rv1264,83332.Rv1320c,83332.Rv1347c,83332.Rv1524,83332.Rv1589,83332.Rv1614,83332.Rv1641,83332.Rv1657,83332.Rv1697,83332.Rv2051c,83332.Rv2065,83332.Rv2139,83332.Rv2153c,8…	trpG,pbpA,ponA1,rplI,glyA2,Rv0386,hemA,rplW,rplV,rplX,rplE,rplF,rplR,rpmD,purD,pmt,rplY,Rv1264,Rv1320c,mbtK,Rv1524,bioB,lgt,infC,argR,Rv1697,ppm1,cobH,pyrD,murG,cysH,rpmA,ldtB,mltG,relA,apt,dut,dapB,rimP,rpsB,rpsP,dacB2,leuC,gatB,moaE1,dacB1,mrsA,rplM,rplQ,folK,hpt,ponA2,egtD
GO Process	GO:1901565	Organonitrogen compound catabolic process	18	80	0.5	0.0034	83332.Rv0070c,83332.Rv0406c,83332.Rv0410c,83332.Rv0888,83332.Rv0983,83332.Rv1022,83332.Rv1769,83332.Rv1850,83332.Rv1905c,83332.Rv1977,83332.Rv2344c,83332.Rv2457c,83332.Rv2697c,83332.Rv2780,83332.Rv2859c,83332.Rv3194c,83332.Rv3701c,83332.Rv3717	glyA2,Rv0406c,pknG,spmT,pepD,lpqU,Rv1769,ureC,aao,Rv1977,dgt,clpX,dut,ald,Rv2859c,Rv3194c,egtD,Rv3717
GO Process	GO:1901564	Organonitrogen compound metabolic process	79	661	0.22	0.00045	83332.Rv0013,83332.Rv0016c,83332.Rv0050,83332.Rv0056,83332.Rv0070c,83332.Rv0386,83332.Rv0406c,83332.Rv0410c,83332.Rv0509,83332.Rv0703,83332.Rv0706,83332.Rv0715,83332.Rv0716,83332.Rv0719,83332.Rv0720,83332.Rv0722,83332.Rv0772,83332.Rv0888,83332.Rv0983,83332.Rv1002c,83332.Rv1015c,83332.Rv1022,83332.Rv1205,83332.Rv1264,83332.Rv1320c,83332.Rv1347c,83332.Rv1524,83332.Rv1589,83332.Rv1614,83332.Rv1641,8…	trpG,pbpA,ponA1,rplI,glyA2,Rv0386,Rv0406c,pknG,hemA,rplW,rplV,rplX,rplE,rplF,rplR,rpmD,purD,spmT,pepD,pmt,rplY,lpqU,log,Rv1264,Rv1320c,mbtK,Rv1524,bioB,lgt,infC,argR,Rv1697,cmk,Rv1769,ureC,aao,Rv1977,dosT,ppm1,cobH,pyrD,murG,ptpA,acpM,dgt,cysH,rpmA,clpX,ldtB,mltG,relA,apt,msrB,dut,lexA,recA,dapB,ald,rimP,Rv2859c,rpsB,lepB,rpsP,dacB2,leuC,gatB,moaE1,Rv3194c,Rv3207c,mtrA,dacB1,mrsA,rplM,rplQ,folK,h…
GO Process	GO:0043043	Peptide biosynthetic process	19	117	0.35	0.0362	83332.Rv0056,83332.Rv0703,83332.Rv0706,83332.Rv0715,83332.Rv0716,83332.Rv0719,83332.Rv0720,83332.Rv0722,83332.Rv1015c,83332.Rv1347c,83332.Rv1524,83332.Rv1641,83332.Rv2441c,83332.Rv2842c,83332.Rv2890c,83332.Rv2909c,83332.Rv3009c,83332.Rv3443c,83332.Rv3456c	rplI,rplW,rplV,rplX,rplE,rplF,rplR,rpmD,rplY,mbtK,Rv1524,infC,rpmA,rimP,rpsB,rpsP,gatB,rplM,rplQ
GO Process	GO:0006518	Peptide metabolic process	20	123	0.36	0.0344	83332.Rv0056,83332.Rv0703,83332.Rv0706,83332.Rv0715,83332.Rv0716,83332.Rv0719,83332.Rv0720,83332.Rv0722,83332.Rv1015c,83332.Rv1347c,83332.Rv1524,83332.Rv1641,83332.Rv2441c,83332.Rv2842c,83332.Rv2890c,83332.Rv2903c,83332.Rv2909c,83332.Rv3009c,83332.Rv3443c,83332.Rv3456c	rplI,rplW,rplV,rplX,rplE,rplF,rplR,rpmD,rplY,mbtK,Rv1524,infC,rpmA,rimP,rpsB,lepB,rpsP,gatB,rplM,rplQ
GO Process	GO:0009252	Peptidoglycan biosynthetic process	9	32	0.59	0.0349	83332.Rv0016c,83332.Rv0050,83332.Rv2153c,83332.Rv2518c,83332.Rv2553c,83332.Rv2911,83332.Rv3330,83332.Rv3441c,83332.Rv3682	pbpA,ponA1,murG,ldtB,mltG,dacB2,dacB1,mrsA,ponA2
GO Process	GO:0000270	Peptidoglycan metabolic process	11	40	0.58	0.0162	83332.Rv0016c,83332.Rv0050,83332.Rv1022,83332.Rv2153c,83332.Rv2518c,83332.Rv2553c,83332.Rv2911,83332.Rv3330,83332.Rv3441c,83332.Rv3682,83332.Rv3717	pbpA,ponA1,lpqU,murG,ldtB,mltG,dacB2,dacB1,mrsA,ponA2,Rv3717
GO Process	GO:0009273	Peptidoglycan-based cell wall biogenesis	21	98	0.47	0.002	83332.Rv0016c,83332.Rv0050,83332.Rv0206c,83332.Rv0503c,83332.Rv0644c,83332.Rv1660,83332.Rv2153c,83332.Rv2187,83332.Rv2518c,83332.Rv2553c,83332.Rv2911,83332.Rv2952,83332.Rv2953,83332.Rv3330,83332.Rv3441c,83332.Rv3515c,83332.Rv3682,83332.Rv3792,83332.Rv3793,83332.Rv3795,83332.Rv3808c	pbpA,ponA1,mmpL3,cmaA2,mmaA2,pks10,murG,fadD15,ldtB,mltG,dacB2,Rv2952,Rv2953,dacB1,mrsA,fadD19,ponA2,aftA,embC,embB,glfT2
GO Process	GO:0044238	Primary metabolic process	162	1342	0.23	8.42e-12	83332.Rv0013,83332.Rv0035,83332.Rv0046c,83332.Rv0050,83332.Rv0056,83332.Rv0062,83332.Rv0070c,83332.Rv0130,83332.Rv0206c,83332.Rv0216,83332.Rv0221,83332.Rv0315,83332.Rv0317c,83332.Rv0386,83332.Rv0410c,83332.Rv0503c,83332.Rv0509,83332.Rv0564c,83332.Rv0629c,83332.Rv0630c,83332.Rv0631c,83332.Rv0644c,83332.Rv0646c,83332.Rv0654,83332.Rv0703,83332.Rv0706,83332.Rv0715,83332.Rv0716,83332.Rv0719,83332.Rv07…	trpG,fadD34,ino1,ponA1,rplI,celA1,glyA2,htdZ,mmpL3,Rv0216,Rv0221,Rv0315,glpQ2,Rv0386,pknG,cmaA2,hemA,gpdA1,recD,recB,recC,mmaA2,lipG,Rv0654,rplW,rplV,rplX,rplE,rplF,rplR,rpmD,purD,Rv0795,desA1,fadE10,spmT,pepD,galU,pmt,ksgA,pks16,rplY,Rv1106c,zwf1,Rv1156,lpqW,pks4,chp2,tagA,udgB,Rv1264,ogt,Rv1320c,Rv1425,Rv1524,Rv1540,dnaE1,lgt,infC,argR,pks10,recN,xerD,cmk,plcD,Rv1769,pgsA2,aao,mce3R,Rv1977,dosT…
GO Process	GO:0019538	Protein metabolic process	39	262	0.32	0.0021	83332.Rv0050,83332.Rv0056,83332.Rv0410c,83332.Rv0703,83332.Rv0706,83332.Rv0715,83332.Rv0716,83332.Rv0719,83332.Rv0720,83332.Rv0722,83332.Rv0983,83332.Rv1002c,83332.Rv1015c,83332.Rv1614,83332.Rv1641,83332.Rv1977,83332.Rv2027c,83332.Rv2051c,83332.Rv2234,83332.Rv2441c,83332.Rv2457c,83332.Rv2674,83332.Rv2720,83332.Rv2737c,83332.Rv2842c,83332.Rv2890c,83332.Rv2903c,83332.Rv2909c,83332.Rv2911,83332.Rv30…	ponA1,rplI,pknG,rplW,rplV,rplX,rplE,rplF,rplR,rpmD,pepD,pmt,rplY,lgt,infC,Rv1977,dosT,ppm1,ptpA,rpmA,clpX,msrB,lexA,recA,rimP,rpsB,lepB,rpsP,dacB2,gatB,moaE1,Rv3194c,Rv3207c,mtrA,dacB1,rplM,rplQ,ponA2,egtD
GO Process	GO:0050789	Regulation of biological process	61	470	0.26	0.00071	83332.Rv0011c,83332.Rv0016c,83332.Rv0050,83332.Rv0078,83332.Rv0135c,83332.Rv0386,83332.Rv0410c,83332.Rv0456c,83332.Rv0474,83332.Rv0530,83332.Rv0602c,83332.Rv0825c,83332.Rv0890c,83332.Rv1033c,83332.Rv1103c,83332.Rv1241,83332.Rv1264,83332.Rv1320c,83332.Rv1398c,83332.Rv1423,83332.Rv1534,83332.Rv1608c,83332.Rv1641,83332.Rv1657,83332.Rv1773c,83332.Rv1956,83332.Rv1960c,83332.Rv1963c,83332.Rv1994c,83332…	crgA,pbpA,ponA1,Rv0078,Rv0135c,Rv0386,pknG,echA2,Rv0474,Rv0530,tcrA,Rv0825c,Rv0890c,trcR,mazE3,vapB33,Rv1264,Rv1320c,vapB10,whiA,Rv1534,bcpB,infC,argR,Rv1773c,higA,parD1,mce3R,cmtR,dosT,Rv2034,rbpA,ftsZ,murG,ptpA,smtB,clpX,ldtB,nusB,lexA,dacB2,glnB,Rv3050c,Rv3058c,Rv3198A,Rv3208,hpf,mtrA,dacB1,vapC46,vapB47,rplM,kstR,Rv3575c,lsr2,cspA,vapC48,Rv3788,Rv3860,parB,Rv3920c
GO Process	GO:0031326	Regulation of cellular biosynthetic process	32	245	0.26	0.0349	83332.Rv0078,83332.Rv0135c,83332.Rv0386,83332.Rv0474,83332.Rv0602c,83332.Rv0890c,83332.Rv1033c,83332.Rv1398c,83332.Rv1534,83332.Rv1641,83332.Rv1657,83332.Rv1773c,83332.Rv1956,83332.Rv1960c,83332.Rv1963c,83332.Rv1994c,83332.Rv2034,83332.Rv2050,83332.Rv2358,83332.Rv2533c,83332.Rv2720,83332.Rv3050c,83332.Rv3058c,83332.Rv3208,83332.Rv3241c,83332.Rv3246c,83332.Rv3443c,83332.Rv3574,83332.Rv3575c,83332.…	Rv0078,Rv0135c,Rv0386,Rv0474,tcrA,Rv0890c,trcR,vapB10,Rv1534,infC,argR,Rv1773c,higA,parD1,mce3R,cmtR,Rv2034,rbpA,smtB,nusB,lexA,Rv3050c,Rv3058c,Rv3208,hpf,mtrA,rplM,kstR,Rv3575c,lsr2,cspA,Rv3788
GO Process	GO:0031323	Regulation of cellular metabolic process	33	262	0.24	0.0427	83332.Rv0078,83332.Rv0135c,83332.Rv0386,83332.Rv0456c,83332.Rv0474,83332.Rv0602c,83332.Rv0890c,83332.Rv1033c,83332.Rv1398c,83332.Rv1534,83332.Rv1641,83332.Rv1657,83332.Rv1773c,83332.Rv1956,83332.Rv1960c,83332.Rv1963c,83332.Rv1994c,83332.Rv2034,83332.Rv2050,83332.Rv2358,83332.Rv2533c,83332.Rv2720,83332.Rv3050c,83332.Rv3058c,83332.Rv3208,83332.Rv3241c,83332.Rv3246c,83332.Rv3443c,83332.Rv3574,83332.…	Rv0078,Rv0135c,Rv0386,echA2,Rv0474,tcrA,Rv0890c,trcR,vapB10,Rv1534,infC,argR,Rv1773c,higA,parD1,mce3R,cmtR,Rv2034,rbpA,smtB,nusB,lexA,Rv3050c,Rv3058c,Rv3208,hpf,mtrA,rplM,kstR,Rv3575c,lsr2,cspA,Rv3788
GO Process	GO:0050794	Regulation of cellular process	44	341	0.25	0.0091	83332.Rv0078,83332.Rv0135c,83332.Rv0386,83332.Rv0456c,83332.Rv0474,83332.Rv0530,83332.Rv0602c,83332.Rv0890c,83332.Rv1033c,83332.Rv1264,83332.Rv1320c,83332.Rv1398c,83332.Rv1534,83332.Rv1608c,83332.Rv1641,83332.Rv1657,83332.Rv1773c,83332.Rv1956,83332.Rv1960c,83332.Rv1963c,83332.Rv1994c,83332.Rv2027c,83332.Rv2034,83332.Rv2050,83332.Rv2150c,83332.Rv2234,83332.Rv2358,83332.Rv2457c,83332.Rv2533c,83332.…	Rv0078,Rv0135c,Rv0386,echA2,Rv0474,Rv0530,tcrA,Rv0890c,trcR,Rv1264,Rv1320c,vapB10,Rv1534,bcpB,infC,argR,Rv1773c,higA,parD1,mce3R,cmtR,dosT,Rv2034,rbpA,ftsZ,ptpA,smtB,clpX,nusB,lexA,Rv3050c,Rv3058c,Rv3198A,Rv3208,hpf,mtrA,rplM,kstR,Rv3575c,lsr2,cspA,Rv3788,Rv3860,parB
GO Process	GO:0050793	Regulation of developmental process	10	36	0.59	0.024	83332.Rv0011c,83332.Rv0016c,83332.Rv0050,83332.Rv1423,83332.Rv2153c,83332.Rv2518c,83332.Rv2911,83332.Rv3330,83332.Rv3917c,83332.Rv3920c	crgA,pbpA,ponA1,whiA,murG,ldtB,dacB2,dacB1,parB,Rv3920c
GO Process	GO:0010556	Regulation of macromolecule biosynthetic process	32	239	0.27	0.0291	83332.Rv0078,83332.Rv0135c,83332.Rv0386,83332.Rv0474,83332.Rv0602c,83332.Rv0890c,83332.Rv1033c,83332.Rv1398c,83332.Rv1534,83332.Rv1641,83332.Rv1657,83332.Rv1773c,83332.Rv1956,83332.Rv1960c,83332.Rv1963c,83332.Rv1994c,83332.Rv2034,83332.Rv2050,83332.Rv2358,83332.Rv2533c,83332.Rv2720,83332.Rv3050c,83332.Rv3058c,83332.Rv3208,83332.Rv3241c,83332.Rv3246c,83332.Rv3443c,83332.Rv3574,83332.Rv3575c,83332.…	Rv0078,Rv0135c,Rv0386,Rv0474,tcrA,Rv0890c,trcR,vapB10,Rv1534,infC,argR,Rv1773c,higA,parD1,mce3R,cmtR,Rv2034,rbpA,smtB,nusB,lexA,Rv3050c,Rv3058c,Rv3208,hpf,mtrA,rplM,kstR,Rv3575c,lsr2,cspA,Rv3788
GO Process	GO:0006355	Regulation of transcription, DNA-templated	29	212	0.28	0.0349	83332.Rv0078,83332.Rv0135c,83332.Rv0386,83332.Rv0474,83332.Rv0602c,83332.Rv0890c,83332.Rv1033c,83332.Rv1398c,83332.Rv1534,83332.Rv1657,83332.Rv1773c,83332.Rv1956,83332.Rv1960c,83332.Rv1963c,83332.Rv1994c,83332.Rv2034,83332.Rv2050,83332.Rv2358,83332.Rv2533c,83332.Rv2720,83332.Rv3050c,83332.Rv3058c,83332.Rv3208,83332.Rv3246c,83332.Rv3574,83332.Rv3575c,83332.Rv3597c,83332.Rv3648c,83332.Rv3788	Rv0078,Rv0135c,Rv0386,Rv0474,tcrA,Rv0890c,trcR,vapB10,Rv1534,argR,Rv1773c,higA,parD1,mce3R,cmtR,Rv2034,rbpA,smtB,nusB,lexA,Rv3050c,Rv3058c,Rv3208,mtrA,kstR,Rv3575c,lsr2,cspA,Rv3788
GO Process	GO:0009628	Response to abiotic stimulus	24	97	0.54	9.49e-05	83332.Rv0050,83332.Rv0221,83332.Rv0503c,83332.Rv0560c,83332.Rv0569,83332.Rv0899,83332.Rv1162,83332.Rv1264,83332.Rv1425,83332.Rv1696,83332.Rv1956,83332.Rv2027c,83332.Rv2185c,83332.Rv2285,83332.Rv2484c,83332.Rv2737c,83332.Rv2780,83332.Rv3083,83332.Rv3084,83332.Rv3088,83332.Rv3480c,83332.Rv3487c,83332.Rv3597c,83332.Rv3734c	ponA1,Rv0221,cmaA2,Rv0560c,Rv0569,ompA,narH,Rv1264,Rv1425,recN,higA,dosT,TB16.3,Rv2285,Rv2484c,recA,ald,mymA,lipR,tgs4,Rv3480c,lipF,lsr2,tgs2
GO Process	GO:0042221	Response to chemical	32	206	0.34	0.0041	83332.Rv0050,83332.Rv0137c,83332.Rv0206c,83332.Rv0221,83332.Rv0406c,83332.Rv0410c,83332.Rv0560c,83332.Rv0888,83332.Rv0983,83332.Rv1103c,83332.Rv1162,83332.Rv1425,83332.Rv1473,83332.Rv1608c,83332.Rv1960c,83332.Rv1994c,83332.Rv2027c,83332.Rv2285,83332.Rv2358,83332.Rv2484c,83332.Rv2720,83332.Rv2737c,83332.Rv2779c,83332.Rv3088,83332.Rv3168,83332.Rv3480c,83332.Rv3546,83332.Rv3597c,83332.Rv3682,83332.R…	ponA1,msrA,mmpL3,Rv0221,Rv0406c,pknG,Rv0560c,spmT,pepD,mazE3,narH,Rv1425,Rv1473,bcpB,parD1,cmtR,dosT,Rv2285,smtB,Rv2484c,lexA,recA,Rv2779c,tgs4,Rv3168,Rv3480c,fadA5,lsr2,ponA2,tgs2,embC,embB
GO Process	GO:0036293	Response to decreased oxygen levels	16	60	0.57	0.002	83332.Rv0050,83332.Rv0221,83332.Rv0503c,83332.Rv0560c,83332.Rv0569,83332.Rv1162,83332.Rv1425,83332.Rv1956,83332.Rv2027c,83332.Rv2185c,83332.Rv2285,83332.Rv2484c,83332.Rv2780,83332.Rv3088,83332.Rv3480c,83332.Rv3734c	ponA1,Rv0221,cmaA2,Rv0560c,Rv0569,narH,Rv1425,higA,dosT,TB16.3,Rv2285,Rv2484c,ald,tgs4,Rv3480c,tgs2
GO Process	GO:0009605	Response to external stimulus	31	232	0.27	0.0344	83332.Rv0137c,83332.Rv0169,83332.Rv0410c,83332.Rv0503c,83332.Rv0560c,83332.Rv0824c,83332.Rv0899,83332.Rv0986,83332.Rv1696,83332.Rv1860,83332.Rv2051c,83332.Rv2206,83332.Rv2234,83332.Rv2284,83332.Rv2301,83332.Rv2528c,83332.Rv2557,83332.Rv2558,83332.Rv2583c,83332.Rv2592c,83332.Rv2720,83332.Rv2737c,83332.Rv2821c,83332.Rv3144c,83332.Rv3237c,83332.Rv3478,83332.Rv3487c,83332.Rv3515c,83332.Rv3583c,83332.…	msrA,mce1A,pknG,cmaA2,Rv0560c,desA1,ompA,Rv0986,recN,apa,ppm1,Rv2206,ptpA,lipM,cut2,mrr,Rv2557,Rv2558,relA,ruvB,lexA,recA,csm3,PPE52,Rv3237c,PPE60,lipF,fadD19,carD,lsr2,espC
GO Process	GO:0001666	Response to hypoxia	15	57	0.56	0.0032	83332.Rv0050,83332.Rv0221,83332.Rv0503c,83332.Rv0560c,83332.Rv0569,83332.Rv1425,83332.Rv1956,83332.Rv2027c,83332.Rv2185c,83332.Rv2285,83332.Rv2484c,83332.Rv2780,83332.Rv3088,83332.Rv3480c,83332.Rv3734c	ponA1,Rv0221,cmaA2,Rv0560c,Rv0569,Rv1425,higA,dosT,TB16.3,Rv2285,Rv2484c,ald,tgs4,Rv3480c,tgs2
GO Process	GO:0071731	Response to nitric oxide	8	21	0.72	0.0169	83332.Rv0221,83332.Rv1162,83332.Rv1425,83332.Rv2285,83332.Rv2484c,83332.Rv3088,83332.Rv3480c,83332.Rv3734c	Rv0221,narH,Rv1425,Rv2285,Rv2484c,tgs4,Rv3480c,tgs2
GO Process	GO:1901698	Response to nitrogen compound	9	24	0.72	0.0093	83332.Rv0221,83332.Rv1162,83332.Rv1425,83332.Rv2285,83332.Rv2484c,83332.Rv2779c,83332.Rv3088,83332.Rv3480c,83332.Rv3734c	Rv0221,narH,Rv1425,Rv2285,Rv2484c,Rv2779c,tgs4,Rv3480c,tgs2
GO Process	GO:0070482	Response to oxygen levels	17	62	0.58	0.001	83332.Rv0050,83332.Rv0221,83332.Rv0503c,83332.Rv0560c,83332.Rv0569,83332.Rv1162,83332.Rv1425,83332.Rv1956,83332.Rv2027c,83332.Rv2185c,83332.Rv2285,83332.Rv2484c,83332.Rv2780,83332.Rv3088,83332.Rv3480c,83332.Rv3597c,83332.Rv3734c	ponA1,Rv0221,cmaA2,Rv0560c,Rv0569,narH,Rv1425,higA,dosT,TB16.3,Rv2285,Rv2484c,ald,tgs4,Rv3480c,lsr2,tgs2
GO Process	GO:1901700	Response to oxygen-containing compound	11	44	0.54	0.0266	83332.Rv0221,83332.Rv0560c,83332.Rv1162,83332.Rv1425,83332.Rv2285,83332.Rv2484c,83332.Rv2779c,83332.Rv3088,83332.Rv3480c,83332.Rv3597c,83332.Rv3734c	Rv0221,Rv0560c,narH,Rv1425,Rv2285,Rv2484c,Rv2779c,tgs4,Rv3480c,lsr2,tgs2
GO Process	GO:0009268	Response to pH	7	19	0.71	0.0349	83332.Rv0899,83332.Rv1162,83332.Rv1264,83332.Rv3083,83332.Rv3084,83332.Rv3088,83332.Rv3487c	ompA,narH,Rv1264,mymA,lipR,tgs4,lipF
GO Process	GO:0050896	Response to stimulus	82	558	0.31	1.38e-07	83332.Rv0019c,83332.Rv0050,83332.Rv0137c,83332.Rv0169,83332.Rv0206c,83332.Rv0221,83332.Rv0386,83332.Rv0406c,83332.Rv0410c,83332.Rv0503c,83332.Rv0560c,83332.Rv0569,83332.Rv0602c,83332.Rv0629c,83332.Rv0630c,83332.Rv0631c,83332.Rv0824c,83332.Rv0888,83332.Rv0899,83332.Rv0983,83332.Rv0986,83332.Rv1033c,83332.Rv1103c,83332.Rv1156,83332.Rv1162,83332.Rv1210,83332.Rv1259,83332.Rv1264,83332.Rv1316c,83332.R…	fhaB,ponA1,msrA,mce1A,mmpL3,Rv0221,Rv0386,Rv0406c,pknG,cmaA2,Rv0560c,Rv0569,tcrA,recD,recB,recC,desA1,spmT,ompA,pepD,Rv0986,trcR,mazE3,Rv1156,narH,tagA,udgB,Rv1264,ogt,Rv1320c,Rv1425,Rv1473,bcpB,recN,apa,higA,parD1,cmtR,dosT,ppm1,TB16.3,Rv2206,ptpA,lipM,Rv2285,cut2,smtB,Rv2484c,mrr,Rv2557,Rv2558,relA,ruvB,msrB,lexA,recA,Rv2779c,ald,csm3,ung,mutT1,mymA,lipR,tgs4,PPE52,Rv3168,Rv3237c,mtrA,PPE60,Rv3…
GO Process	GO:0006950	Response to stress	42	221	0.42	9.02e-06	83332.Rv0019c,83332.Rv0050,83332.Rv0137c,83332.Rv0221,83332.Rv0503c,83332.Rv0560c,83332.Rv0569,83332.Rv0629c,83332.Rv0630c,83332.Rv0631c,83332.Rv1156,83332.Rv1210,83332.Rv1259,83332.Rv1316c,83332.Rv1425,83332.Rv1608c,83332.Rv1696,83332.Rv1860,83332.Rv1956,83332.Rv2027c,83332.Rv2185c,83332.Rv2285,83332.Rv2484c,83332.Rv2528c,83332.Rv2557,83332.Rv2558,83332.Rv2583c,83332.Rv2592c,83332.Rv2674,83332.R…	fhaB,ponA1,msrA,Rv0221,cmaA2,Rv0560c,Rv0569,recD,recB,recC,Rv1156,tagA,udgB,ogt,Rv1425,bcpB,recN,apa,higA,dosT,TB16.3,Rv2285,Rv2484c,mrr,Rv2557,Rv2558,relA,ruvB,msrB,lexA,recA,ald,csm3,ung,mutT1,tgs4,Rv3480c,carD,lsr2,lpqG,nth,tgs2
GO Process	GO:0006412	Translation	17	100	0.37	0.0407	83332.Rv0056,83332.Rv0703,83332.Rv0706,83332.Rv0715,83332.Rv0716,83332.Rv0719,83332.Rv0720,83332.Rv0722,83332.Rv1015c,83332.Rv1641,83332.Rv2441c,83332.Rv2842c,83332.Rv2890c,83332.Rv2909c,83332.Rv3009c,83332.Rv3443c,83332.Rv3456c	rplI,rplW,rplV,rplX,rplE,rplF,rplR,rpmD,rplY,infC,rpmA,rimP,rpsB,rpsP,gatB,rplM,rplQ
GO Process	GO:0019432	Triglyceride biosynthetic process	7	19	0.71	0.0349	83332.Rv0221,83332.Rv1425,83332.Rv2285,83332.Rv2484c,83332.Rv3088,83332.Rv3480c,83332.Rv3734c	Rv0221,Rv1425,Rv2285,Rv2484c,tgs4,Rv3480c,tgs2

## Sheet: Ecu_downregulated_Revigo
TermID	Name	Value	LogSize	Frequency	Uniqueness	Dispensability	PC_0	PC_1	Representative
GO:0000270	peptidoglycan metabolic process	-1.79048	1.63347	1.88004	0.858687	0.234812	-0.246205	-7.51944	null
GO:0009252	peptidoglycan biosynthetic process	-1.45717	1.54407	1.52193	0.727566	0.949695	null	null	270
GO:1901137	carbohydrate derivative biosynthetic process	-2.5376	2.28103	8.50492	0.87096	0.5797	null	null	270
GO:0005975	carbohydrate metabolic process	-1.82681	2.15836	6.40107	0.940134	0.114874	-7.60583	-1.42307	null
GO:0006071	glycerol metabolic process	-1.53611	1.39794	1.07431	0.95475	0.0630077	5.12023	0.781986	null
GO:0006281	DNA repair	-1.61979	1.83885	3.04387	0.731763	0.303036	3.18468	-5.45146	null
GO:0000724	double-strand break repair via homologous recombination	-1.37675	0.69897	0.179051	0.803059	0.677209	null	null	6281
GO:0006974	DNA damage response	-1.72125	1.86332	3.22292	0.815491	0.773364	null	null	6281
GO:0033554	cellular response to stress	-2.65758	2.11727	5.81916	0.808605	0.662865	null	null	6281
GO:0006412	translation	-1.39041	2.01284	4.5658	0.810568	0.274947	-1.89691	-6.72361	null
GO:0010467	gene expression	-1.74232	2.33646	9.66876	0.801047	0.604966	null	null	6412
GO:0006518	peptide metabolic process	-1.46344	1.34242	0.940018	0.965802	0.0335314	3.31482	-8.81702	null
GO:0006629	lipid metabolic process	-5.14691	2.57287	16.6965	0.927348	0.105113	-6.99755	-2.77126	null
GO:0006950	response to stress	-5.04479	2.35793	10.1611	0.855049	0.370261	5.00043	-4.65022	null
GO:0007154	cell communication	-1.61979	1.76343	2.55148	0.972423	0.0387405	7.15005	0.85836	null
GO:0008152	metabolic process	-2.76955	3.17522	66.9651	1	0	7.66568	-0.557894	null
GO:0008610	lipid biosynthetic process	-4.29073	2.34635	9.89257	0.84262	0.49255	-4.64044	-5.46629	null
GO:0044255	cellular lipid metabolic process	-4.13136	2.41497	11.5936	0.854565	0.667445	null	null	8610
GO:0009056	catabolic process	-1.45717	2.42651	11.9069	0.947054	0.0926816	5.36611	3.66108	null
GO:0009058	biosynthetic process	-7.92812	2.94151	39.0779	0.927837	0.158631	-6.51606	0.866972	null
GO:0009059	macromolecule biosynthetic process	-5.10735	2.51587	14.6374	0.804574	0.387617	-2.31952	-5.9584	null
GO:0009273	peptidoglycan-based cell wall biogenesis	-2.69897	1.95904	4.02865	0.852158	0	6.41683	2.37127	null
GO:0016043	cellular component organization	-2.85387	2.26482	8.19158	0.877847	0.786192	null	null	9273
GO:0044036	cell wall macromolecule metabolic process	-2.65758	0.845098	0.268577	0.865223	0.60006	null	null	9273
GO:0044038	cell wall macromolecule biosynthetic process	-2.4437	1.72428	2.32766	0.749523	0.873951	null	null	9273
GO:0044085	cellular component biogenesis	-4.25571	2.20683	7.16204	0.880036	0.690787	null	null	9273
GO:0071555	cell wall organization	-2.09691	1.83251	2.9991	0.861723	0.815567	null	null	9273
GO:0009605	response to external stimulus	-1.46344	2.29003	8.68397	0.858447	0.425328	4.9885	-5.0635	null
GO:0009628	response to abiotic stimulus	-4.02273	1.98677	4.29722	0.872115	0	5.32767	-5.45658	null
GO:0009987	cellular process	-16.5171	3.17464	66.8756	1	0	1.74398	-9.38099	null
GO:0019538	protein metabolic process	-2.67778	2.42325	11.8174	0.846274	0.478472	-0.847833	-7.2433	null
GO:0032259	methylation	-1.59517	1.94939	3.93912	0.957351	0.0409588	0.742026	-0.827408	null
GO:0042221	response to chemical	-2.38722	2.31597	9.22113	0.857164	0.430794	5.62202	-4.96528	null
GO:0043043	peptide biosynthetic process	-1.44129	1.27875	0.80573	0.927728	0.0328897	-2.65827	-3.50912	null
GO:0043170	macromolecule metabolic process	-4.94692	2.77525	26.6338	0.935454	0.129016	-5.96347	2.40832	null
GO:0043603	amide metabolic process	-2.09691	1.69897	2.19338	0.96128	0.037559	2.57928	0.77144	null
GO:0043604	amide biosynthetic process	-1.36957	1.44716	1.20859	0.923767	0.123945	-4.33913	-7.35661	null
GO:0044237	cellular metabolic process	-11.2314	3.03222	48.1647	0.900827	0.0676115	-5.78669	0.143041	null
GO:0044238	primary metabolic process	-11.0747	3.09447	55.5953	0.91931	0.201075	-5.07719	-0.286222	null
GO:0044249	cellular biosynthetic process	-7.79317	2.83251	30.3939	0.839036	0.204198	-4.03742	-4.58585	null
GO:0044419	biological process involved in interspecies interaction between organisms	-3.34679	2.49415	13.9212	1	0	1.03046	3.25024	null
GO:0045017	glycerolipid biosynthetic process	-2.3098	1.51851	1.43241	0.845952	0.476999	-5.07034	-5.65046	null
GO:0019432	triglyceride biosynthetic process	-1.45717	1.25527	0.760967	0.85662	0.800622	null	null	45017
GO:0046486	glycerolipid metabolic process	-2.65758	1.73239	2.37243	0.880472	0.0383351	-6.13683	-5.0641	null
GO:0050789	regulation of biological process	-3.14874	2.62941	19.0242	0.889586	0.455143	-1.27362	5.43119	null
GO:0006355	regulation of DNA-templated transcription	-1.45717	2.33646	9.66876	0.883004	0.65308	null	null	50789
GO:0010556	regulation of macromolecule biosynthetic process	-1.53611	2.42813	11.9517	0.878488	0.829204	null	null	50789
GO:0031323	regulation of cellular metabolic process	-1.36957	2.45179	12.6231	0.87925	0.841667	null	null	50789
GO:0031326	regulation of cellular biosynthetic process	-1.45717	2.43616	12.1755	0.878233	0.868508	null	null	50789
GO:0050794	regulation of cellular process	-2.04096	2.51851	14.7269	0.892375	0.729948	null	null	50789
GO:0050793	regulation of developmental process	-1.61979	1.59106	1.70098	0.925248	0	-1.59616	5.38746	null
GO:0050896	response to stimulus	-6.86012	2.76118	25.7833	1	0	0.781992	5.67632	null
GO:0051301	cell division	-1.62709	1.4624	1.25336	0.975061	0.0351127	-0.972265	0.597282	null
GO:0051701	biological process involved in interaction with host	-3	2.46538	13.026	0.98827	0.405875	-4.25522	4.20181	null
GO:0051716	cellular response to stimulus	-3	2.34044	9.75828	0.828641	0.436081	5.44307	-4.60582	null
GO:0052008	symbiont-mediated disruption of host cellular anatomical entity	-1.48017	0.69897	0.179051	0.98827	0	-3.9441	4.36498	null
GO:0065007	biological regulation	-3.36653	2.64444	19.6956	1	0	3.90559	4.81575	null
GO:0070482	response to oxygen levels	-3	1.79934	2.77529	0.836791	0.298877	4.84407	-4.03404	null
GO:0001666	response to hypoxia	-2.49485	1.77085	2.59624	0.805146	0.832548	null	null	70482
GO:0009268	response to pH	-1.45717	1.27875	0.80573	0.857695	0.716656	null	null	70482
GO:0036293	response to decreased oxygen levels	-2.69897	1.78533	2.68577	0.833964	0.95894	null	null	70482
GO:0071554	cell wall organization or biogenesis	-2.49485	2.09342	5.50582	0.968845	0.0734298	3.48544	2.91292	null
GO:0071731	response to nitric oxide	-1.77211	1.32222	0.895255	0.881041	0.465756	6.15701	-4.0398	null
GO:0071840	cellular component organization or biogenesis	-4.29073	2.37107	10.4745	0.965041	0.0892414	-1.46362	2.90485	null
GO:1901135	carbohydrate derivative metabolic process	-2.1549	2.42975	11.9964	0.946966	0.0929251	2.32155	5.34107	null
GO:1901564	organonitrogen compound metabolic process	-3.34679	2.82543	29.9015	0.93333	0.136721	-4.05206	1.18301	null
GO:1901565	organonitrogen compound catabolic process	-2.46852	1.94939	3.93912	0.924293	0	-0.969588	-8.65652	null
GO:1901566	organonitrogen compound biosynthetic process	-1.96257	2.64345	19.6509	0.846541	0.406272	-2.62176	-6.70956	null
GO:1901698	response to nitrogen compound	-2.03152	1.38021	1.02954	0.879216	0.260502	5.86465	-3.75567	null
GO:1901700	response to oxygen-containing compound	-1.57512	1.64345	1.9248	0.87037	0.50757	null	null	1901698

[truncated: 2 more sheets: Ecu_upregulated_String, Ecu_upregulated_Revigo]
